# Supplementary material for: Transcriptomic analysis reveals reduced transcriptional activity in the malaria parasite Plasmodium cynomolgi during progression into dormancy
Source: eLife journal article supplement (doi:10.7554/elife.41081), 2018-12-27

Figure 1- Figure supplement 3

A.

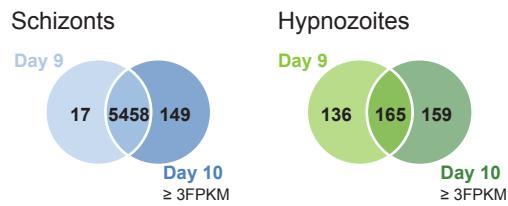

B.

|                          | Gene ID       | Annotation       | SZ Day 9 |         | SZ Day 10 |       | HZ Day9 |  | HZ Day10 |  |
|--------------------------|---------------|------------------|----------|---------|-----------|-------|---------|--|----------|--|
|                          |               |                  |          |         |           |       |         |  |          |  |
| merozoite-specific genes | PcyM_1152100  | DBP              | 17.80    | 50.38   | 0.01      | 3.66  |         |  |          |  |
|                          | PcyM_1476400  | RBP2b            | 9.60     | 22.17   | 0.02      | 1.42  |         |  |          |  |
|                          | PcyM_0424000  | RBP2b            | 6.63     | 19.02   | 0.03      | 1.41  |         |  |          |  |
|                          | PcyM_0628800  | DBP              | 19.66    | 55.69   | 0.05      | 4.39  |         |  |          |  |
|                          | PcyM_0628800  | EBA175           | 19.66    | 55.69   | 0.05      | 4.39  |         |  |          |  |
|                          | PcyM_1026500  | SUB1             | 8.96     | 42.31   | 0.06      | 1.31  |         |  |          |  |
|                          | PcyM_0731100  | MSP1P            | 15.07    | 37.73   | 0.08      | 0.49  |         |  |          |  |
|                          | PcyM_0535100  | RBP2b            | 14.72    | 48.68   | 0.09      | 3.66  |         |  |          |  |
|                          | PcyM_0700500  | Rbp1             | 19.40    | 52.66   | 0.13      | 3.63  |         |  |          |  |
|                          | PcyM_0941900  | SUB2             | 42.41    | 35.64   | 0.17      | 0.54  |         |  |          |  |
|                          | PcyM_0322500  | RALP1            | 29.87    | 39.09   | 0.18      | 0.53  |         |  |          |  |
|                          | PcyM_0504400  | GAMA             | 26.43    | 64.77   | 0.20      | 2.86  |         |  |          |  |
|                          | PcyM_0938200  | AMA1             | 44.16    | 116.39  | 0.22      | 5.83  |         |  |          |  |
|                          | PcyM_0617400  | MTRAP            | 41.93    | 108.97  | 0.24      | 3.99  |         |  |          |  |
|                          | PcyM_10108200 | RAMA             | 62.43    | 149.15  | 0.29      | 2.30  |         |  |          |  |
|                          | PcyM_1438300  | TRAMP            | 45.43    | 80.01   | 0.32      | 2.03  |         |  |          |  |
|                          | PcyM_0817800  | RIPR             | 49.79    | 86.46   | 0.41      | 2.25  |         |  |          |  |
|                          | PcyM_0731200  | MSP1             | 231.65   | 364.96  | 1.49      | 4.63  |         |  |          |  |
| house-keeping genes      | PcyM_1436300  | ser-tRNA ligase  | 86.52    | 86.31   | 0.48      | 0.59  |         |  |          |  |
|                          | PcyM_1002800  | cyclophilin      | 58.47    | 58.97   | 0.49      | 0.45  |         |  |          |  |
|                          | PcyM_0406600  | RNA-Pol II       | 84.26    | 65.76   | 0.67      | 0.70  |         |  |          |  |
|                          | PcyM_1225800  | glut-tRNA ligase | 117.43   | 75.35   | 0.76      | 0.85  |         |  |          |  |
|                          | PcyM_0532100  | tubulin, alpha   | 220.46   | 185.66  | 1.69      | 1.66  |         |  |          |  |
|                          | PcyM_0701400  | tubulin, alpha   | 166.94   | 124.24  | 1.97      | 1.50  |         |  |          |  |
|                          | PcyM_1439000  | arg-tRNA ligase  | 263.87   | 265.38  | 3.42      | 3.48  |         |  |          |  |
|                          | PcyM_0808300  | Tubulin, beta    | 409.05   | 462.81  | 4.14      | 3.58  |         |  |          |  |
|                          | PcyM_0515400  | hsp70            | 1706.75  | 1650.80 | 13.58     | 12.60 |         |  |          |  |
|                          | PcyM_1114700  | EF1alpha         | 1853.50  | 1685.33 | 15.92     | 13.44 |         |  |          |  |

10+  
0 [FPKM] (avg.)

C.

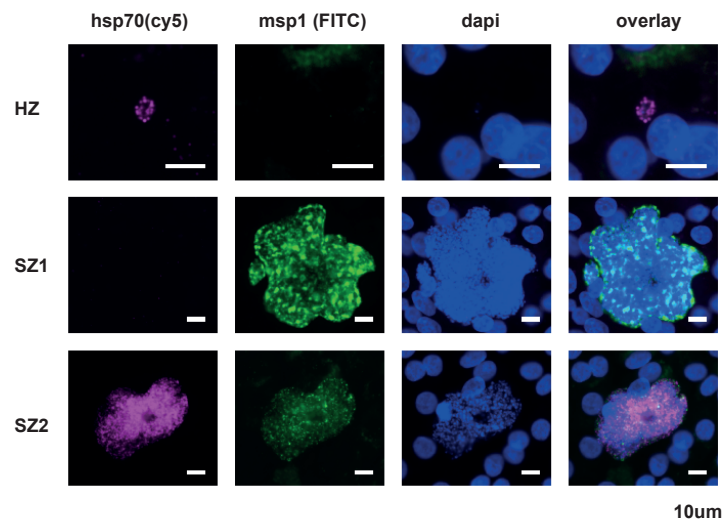

Supplement: supp [file elife-41081-supp-v1.zip]
