# Supplementary material for: Transcriptomic analysis reveals reduced transcriptional activity in the malaria parasite Plasmodium cynomolgi during progression into dormancy
Source: eLife journal article supplement (doi:10.7554/elife.41081), 2018-12-27

Figure 1 - Figure supplement 5

A.

| Gene ID      | Annotation                                                 | HZ Day 9 [Avg. FPKM] | SZ Day 9 [Avg. FPKM] |
|--------------|------------------------------------------------------------|----------------------|----------------------|
| PcyM_0317700 | dynein heavy chain, putative                               | 0.20                 | 17.30                |
| PcyM_1124800 | conserved Plasmodium protein, unknown function             | 0.28                 | 36.55                |
| PcyM_0519400 | n.a.                                                       | 0.12                 | 14.61                |
| PcyM_0516100 | Plasmodium exported protein (PHIST), unknown function      | 0.18                 | 33.02                |
| PcyM_1453900 | conserved Plasmodium protein, unknown function             | 0.00                 | 5.07                 |
| PcyM_1261200 | conserved Plasmodium protein, unknown function             | 0.27                 | 39.59                |
| PcyM_1031600 | merozoite surface protein 3 (MSP3.6)                       | 0.10                 | 35.80                |
| PcyM_1265700 | conserved Plasmodium protein, unknown function             | 0.06                 | 10.73                |
| PcyM_1450200 | merozoite surface protein 9 (MSP9)                         | 0.00                 | 19.04                |
| PcyM_0303600 | Plasmodium exported protein, unknown function              | 0.00                 | 16.03                |
| PcyM_1250300 | conserved Plasmodium protein, unknown function             | 0.12                 | 36.68                |
| PcyM_0533600 | early transcribed membrane protein (ETRAMP)                | 0.00                 | 21.52                |
| PcyM_0944000 | RNA-binding protein, putative                              | 0.13                 | 16.88                |
| PcyM_1423400 | phosphodiesterase gamma, putative (PDEgamma)               | 0.13                 | 8.03                 |
| PcyM_1006500 | acyl-CoA synthetase (ACS10)                                | 0.17                 | 47.68                |
| PcyM_1108500 | conserved Plasmodium protein, unknown function             | 0.10                 | 10.39                |
| PcyM_1005800 | inner membrane complex protein 1g, putative (IMC1g)        | 0.13                 | 12.30                |
| PcyM_1127600 | transcription factor with AP2 domain(s), putative (ApiAP2) | 0.10                 | 27.34                |
| PcyM_1219100 | n.a.                                                       | 0.18                 | 27.41                |
| PcyM_0518700 | conserved Plasmodium protein, unknown function             | 0.23                 | 18.22                |
| PcyM_1145100 | MYND finger protein, putative                              | 0.59                 | 19.54                |
| PcyM_0316800 | calcium-dependent protein kinase 4 (CDPK4)                 | 0.35                 | 70.74                |
| PcyM_0121700 | Plasmodium exported protein (PHISTc), unknown function     | 0.13                 | 10.79                |
| PcyM_0942900 | conserved Plasmodium protein, unknown function             | 0.06                 | 2.95                 |

B.

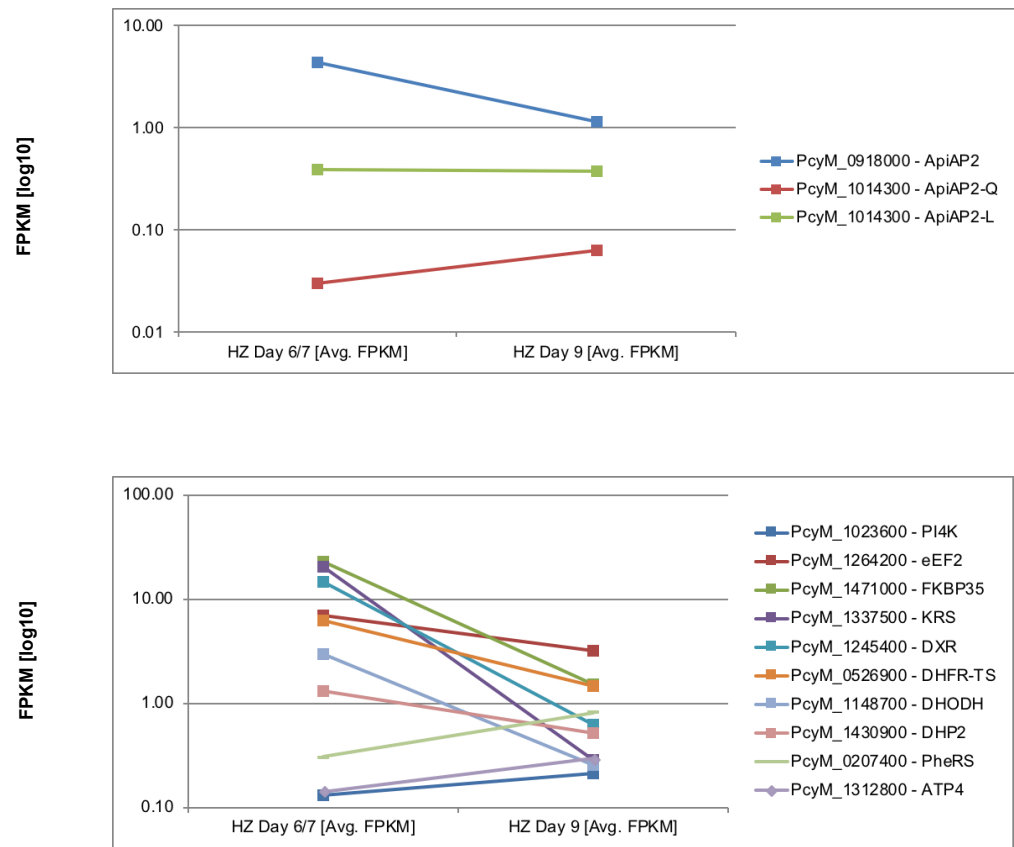

Supplement: supp [file elife-41081-supp-v1.zip]
