# Supplementary material for: Transcriptomic analysis reveals reduced transcriptional activity in the malaria parasite Plasmodium cynomolgi during progression into dormancy
Source: eLife. 2018 Dec 27;7:e41081. doi: 10.7554/eLife.41081 (PMC6344078; doi:10.7554/eLife.41081)
Supplement: Supplementary file 1. [file elife-41081-supp1.xlsx]

## Sheet: Sheet1
Supplementary file 1: P. cynomolgi samples used for RNA-seq, related to Figure 1
Sample	Sample ID	Infection	Hepatocyte origin	EEF harvested at	# sorted parasites
GFPhigh	Sz-1 Day 9/10	PAC27-Feed1	M. mulatta	Day 9	7271
	Sz-2 Day 9/10	PAC27-Feed1	M. mulatta	Day 10	6742
	Sz-3 Day 9/10	PAC27-Feed2	M. mulatta	Day 9	3610
	Sz-4 Day 9/10	PAC27-Feed2	M. mulatta	Day 10	2998
	Sz-5 Day 9/10	PAC30-Feed2	M. mulatta	Day 10	4296
	Sz-6 Day 9/10	PAC31-Feed1+2	M. mulatta	Day 10	1320
GFPlow	Hz-1 Day 9/10	PAC27-Feed1	M. mulatta	Day 9	1742
	Hz-2 Day 9/10	PAC27-Feed1	M. mulatta	Day 10	2877
	Hz-3 Day 9/10	PAC27-Feed2	M. mulatta	Day 9	714
	Hz-4 Day 9/10	PAC27-Feed2	M. mulatta	Day 10	2119
	Hz-5 Day 9/10	PAC30-Feed2	M. mulatta	Day 10	7350
	Hz-6 Day 9/10	PAC31-Feed1+2	M. mulatta	Day 10	408
