# Supplementary material for: Transcriptomic analysis reveals reduced transcriptional activity in the malaria parasite Plasmodium cynomolgi during progression into dormancy
Source: eLife. 2018 Dec 27;7:e41081. doi: 10.7554/eLife.41081 (PMC6344078; doi:10.7554/eLife.41081)
Supplement: Supplementary file 2. [file elife-41081-supp2.xlsx]

## Sheet: Sheet1
Supplementary file 2: Genes with expression vaues ≥ 3 FPKM in hypnozoite samples at day 9 or day 10, related to Figure 1-figure supplement 3B.
HYP-DAY 10 only >=3FPKM					HYP-DAY 9 only >=3FPKM
Gene ID	Annotation	Mean HZ Day 9	Mean HZ Day 10		Gene ID	Annotation	Mean HZ Day 9	Mean HZ Day 10
PcyM_1260600	aminopeptidase P (APP)	1.49382	3.57472		PcyM_1435600	10 kDa chaperonin (CPN10)	3.94189	2.83444
PcyM_1219600	calcium-dependent protein kinase 5 (CDPK5)	0.400448	5.0061		PcyM_0503400	18S ribosomal RNA	8.58099	2.40103
PcyM_0616100	centrin-3, putative (CEN3)	2.48466	3.10537		PcyM_0120400	1-cys peroxiredoxin (1-CysPxn)	3.65989	2.76136
PcyM_0919300	chaperone protein ClpB1, putative (ClpB1)	0.358665	8.0898		PcyM_0113700	26S proteasome regulatory subunit RPN10, putative (RPN10)	3.32443	2.04698
PcyM_1112200	CUGBP Elav-like family member 1, putative (CELF1)	2.52054	3.00567		PcyM_0830500	26S proteasome regulatory subunit RPN12, putative (RPN12)	3.45977	2.33067
PcyM_0212400	cyclase-associated protein (C-CAP)	0.861135	4.66065		PcyM_0321900	40S ribosomal protein S5, putative	6.06029	2.85484
PcyM_1255400	cysteine proteinase falcipain 1 (FP1)	2.98924	3.12661		PcyM_1011900	40S ribosomal protein S9, putative	6.3007	2.11285
PcyM_0917700	cysteine proteinase, putative	1.14487	4.11089		PcyM_0213400	4-hydroxy-3-methylbut-2-enyl diphosphate reductase, putative (LytB)	3.3131	1.25845
PcyM_0220700	DnaJ domain containing protein	0	3.41309		PcyM_0112400	50S ribosomal protein L1, mitochondrial, putative (RPL1)	3.17148	1.57603
PcyM_0115500	DnaJ protein, putative	1.04482	3.38204		PcyM_1340600	60S ribosomal protein L10, putative	3.2688	1.28442
PcyM_1403200	EMP1-trafficking protein (PTP6)	0.262501	10.8412		PcyM_1320400	60S ribosomal protein L14, putative	4.66133	2.05897
PcyM_0117200	gamete release protein, putative	0.148443	7.09287		PcyM_0524100	60S ribosomal protein L15, putative	3.66886	2.36618
PcyM_1403500	gametocyte associated protein, putative (GAP)	0.218003	3.66961		PcyM_1410700	60S ribosomal protein L24, putative	7.29002	2.15082
PcyM_1349200	glideosome associated protein with multiple membrane spans 3, putative (GAPM3)	1.35299	3.15997		PcyM_1253000	60S ribosomal protein L29, putative	5.29133	0.558569
PcyM_0837900	glutaredoxin 1, putative (GRX1)	2.96385	3.37306		PcyM_0928900	60S ribosomal protein L35, putative	3.79159	2.05716
PcyM_1259500	hemolysin III (HlyIII)	0.516969	3.53558		PcyM_0949100	60S ribosomal protein L41, putative	5.78661	1.90928
PcyM_0803000	inner membrane complex protein 1c, putative (IMC1c)	0.503316	11.6676		PcyM_1218900	60S ribosomal protein L6-2, putative	4.05953	2.92621
PcyM_1252600	inner membrane complex sub-compartment protein 3 (ISP3)	1.759	3.17796		PcyM_0835500	activator of Hsp90 ATPase, putative	4.78639	1.82033
PcyM_0502500	liver stage associated protein 2 (LSAP2)	0.324496	9.20963		PcyM_0405000	ATP synthase F1, alpha subunit, putative	3.4277	2.16382
PcyM_1146200	long chain polyunsaturated fatty acid elongation enzyme, putative	0.949021	12.0605		PcyM_1459000	ATP synthase subunit beta, mitochondrial	3.82848	2.5079
PcyM_0407300	long-chain acyl-CoA synthase, putative	1.03487	15.5673		PcyM_0702400	bacterial histone-like protein, putative (HU)	3.38743	2.13408
PcyM_1281000	lysophospholipase, putative	0	5.16865		PcyM_0615200	biotin--acetyl-CoA-carboxylase, putative	3.33303	2.69548
PcyM_1008800	multidrug resistance protein 1 (MDR1)	0.622887	3.67648		PcyM_1011200	bis(5'-nucleosyl)-tetraphosphatase [asymmetrical]	3.26001	1.40946
PcyM_1214000	myosin A (MyoA)	0.689579	17.0679		PcyM_1317400	calmodulin, putative (CAM)	3.0435	2.4181
PcyM_1470000	myosin A tail domain interacting protein (MTIP)	1.07946	8.80858		PcyM_1121800	choline/ethanolaminephosphotransferase (CEPT)	3.55084	2.44364
PcyM_1207200	nucleoside diphosphate hydrolase, putative	2.0231	3.36409		PcyM_0113000	coatomer subunit epsilon, putative (SEC28)	4.0324	1.68056
PcyM_1424500	palmitoyltransferase, putative (DHHC4)	0.723578	3.55972		PcyM_1461800	conserved protein, unknown function	4.32165	2.87895
PcyM_0116600	PAP2-like protein, putative	0.215132	4.09206		PcyM_MT03400	cytochrome b (CYTB)	3.66714	0.589439
PcyM_0410700	peptide chain release factor subunit 1, putative	1.0387	4.51269		PcyM_0805700	DNA/RNA-binding protein Alba 3 (ALBA3)	3.48222	2.7677
PcyM_1142600	permease, putative	1.60275	5.4161		PcyM_1208900	DNA/RNA-binding protein Alba 4 (ALBA4)	4.11126	2.24712
PcyM_0208200	photosensitized INA-labeled protein PHIL1, putative (PHIL1)	0.549971	4.7965		PcyM_0948000	DnaJ protein, putative	4.90401	2.4596
PcyM_0113200	plasmepsin X	0.243317	3.56398		PcyM_1264000	E3 SUMO-protein ligase NSE2, putative (NSE2)	4.05903	2.76349
PcyM_1280800	protein SIS1, putative (SIS1)	0.0634778	14.8202		PcyM_0822300	elongation factor 1 (EF-1), putative	3.43059	1.27022
PcyM_1402400	PST-A protein	0	3.14961		PcyM_0711400	elongation factor 1-beta, putative	3.40576	1.92721
PcyM_1123400	pyruvate kinase, putative	1.92582	5.29696		PcyM_1218800	elongation factor 1-gamma, putative	4.63412	2.86347
PcyM_1412300	RNA-binding protein, putative	0.15776	4.56787		PcyM_0910600	endoplasmic reticulum-resident calcium binding protein, putative (ERC)	4.16858	1.73507
PcyM_0510400	RNA-binding protein, putative	0.359808	5.27133		PcyM_0718500	fatty acid elongation protein, GNS1/SUR4 family, putative, pseudogene	3.49025	2.38293
PcyM_0716300	secreted acid phosphatase, putative (GAP50)	2.00352	3.14505		PcyM_0933000	geranylgeranyl pyrophosphate synthase, putative (GGPPS)	4.2713	2.36132
PcyM_0732300	selenoprotein, putative (Sel2)	2.33783	3.41628		PcyM_1254500	golgi apparatus membrane protein TVP23, putative (TVP23)	3.00073	1.17862
PcyM_1034300	skeleton-binding protein 1 (SBP1)	0.806959	8.09807		PcyM_1112700	GTP-binding protein, putative	3.18371	1.81893
PcyM_0502900	sporozoite invasion-associated protein 2, putative (SIAP2)	0.511372	3.0307		PcyM_1440900	heterochromatin protein 1 (HP1)	4.22289	1.99041
PcyM_0213700	StAR-related lipid transfer protein, putative	1.90412	8.13227		PcyM_0610700	HORMA domain protein, putative	3.71627	1.30618
PcyM_0205800	transcription initiation factor TFIIB, putative	1.7986	3.08458		PcyM_1112900	HVA22-like protein, putative	4.23931	1.6035
PcyM_1025400	triose phosphate transporter, putative	0.992611	5.08132		PcyM_1001600	hypothetical protein, conserved	4.26933	1.99122
PcyM_0417900	unspecified product	0.356387	3.58076		PcyM_1301100	liver stage associated protein 1 (LSAP1)	3.28807	2.71189
PcyM_0322200	V-type ATPase V0 subunit e, putative	2.00686	3.54258		PcyM_0325800	mago nashi protein homologue, putative	4.84738	1.81831
PcyM_0724800	zinc binding protein (Yippee), putative	1.94572	3.17735		PcyM_0712900	major facilitator superfamily-related transporter, putative	3.40634	2.59901
PcyM_0704500	zinc finger protein, putative	1.41247	3.45852		PcyM_1316800	mitochondrial acidic protein MAM33, putative	3.11531	2.11873
PcyM_0517000	zinc finger protein, putative	0.379139	3.00466		PcyM_1233400	mitochondrial fission 1 protein, putative (FIS1)	4.08258	1.89952
					PcyM_1012900	mitochondrial ribosomal protein L14 precursor, putative	4.02886	2.14801
Conserved proteins, unknown function					PcyM_1412600	mitochondrial ribosomal protein S15 precursor, putative	3.30653	2.27167
PcyM_0725200	conserved Plasmodium protein, unknown function	2.78505	16.4456		PcyM_1321700	NADP-specific glutamate dehydrogenase, putative (GDH2)	3.18465	2.66789
PcyM_1259600	conserved Plasmodium protein, unknown function	0.260639	6.93176		PcyM_1343100	nuclear transport factor 2, putative (NTF2)	3.77918	1.38334
PcyM_1416700	conserved Plasmodium protein, unknown function	0.894688	4.69705		PcyM_1104800	nucleoside diphosphate kinase (NDK)	4.63129	2.15054
PcyM_1251500	conserved Plasmodium protein, unknown function	1.23286	5.25887		PcyM_1209200	nucleoside transporter 1 (NT1)	3.07225	2.38691
PcyM_0930000	conserved Plasmodium protein, unknown function	0.664133	6.55895		PcyM_0918100	peptidyl-prolyl cis-trans isomerase, putative	4.35314	2.05324
PcyM_1454300	conserved Plasmodium protein, unknown function	2.79529	3.05776		PcyM_0603900	PHF5-like protein, putative	4.41382	2.27493
PcyM_0310400	conserved Plasmodium protein, unknown function	0.179624	3.31871		PcyM_1021100	prefoldin subunit, putative	3.24513	1.44377
PcyM_0625800	conserved Plasmodium protein, unknown function	0.629827	5.53311		PcyM_1003500	proteasome maturation factor UMP1, putative (UMP1)	7.78354	2.44794
PcyM_0104000	conserved Plasmodium protein, unknown function	0.690673	5.12584		PcyM_1118200	proteasome subunit alpha type-4, putative	3.12233	1.73672
PcyM_0420700	conserved Plasmodium protein, unknown function	1.22023	4.7219		PcyM_0114000	proteasome subunit alpha type-6, putative	3.41274	2.59794
PcyM_0625600	conserved Plasmodium protein, unknown function	0.413683	4.04573		PcyM_1013700	proteasome subunit beta type-1, putative	5.34129	2.83991
PcyM_0733200	conserved Plasmodium protein, unknown function	1.51904	4.1163		PcyM_0811700	proteasome subunit beta type-5	3.76382	2.28874
PcyM_0321800	conserved Plasmodium protein, unknown function	2.52412	4.16624		PcyM_0821800	protein phosphatase inhibitor 2, putative	3.31839	1.07656
PcyM_1237600	conserved Plasmodium protein, unknown function	2.51936	4.79178		PcyM_0700800	protein RER1, putative (RER1)	4.38214	2.29064
PcyM_0602900	conserved Plasmodium protein, unknown function	0.438991	4.82143		PcyM_0915700	protein tyrosine phosphatase, putative	4.80672	2.27545
PcyM_1150600	conserved Plasmodium protein, unknown function	0.245587	14.9447		PcyM_1466100	rab specific GDP dissociation inhibitor (rabGDI)	3.36246	2.99159
PcyM_0208700	conserved Plasmodium protein, unknown function	2.20771	24.6056		PcyM_0529700	ran binding protein 1, putative	3.46784	2.7718
PcyM_1100700	conserved Plasmodium protein, unknown function	0.91733	3.34759		PcyM_0700900	ras-related protein RAB7, putative (RAB7)	3.86493	2.52393
PcyM_0108400	conserved Plasmodium protein, unknown function	0.502323	3.93605		PcyM_1465000	replication factor C subunit 4, putative (RFC4)	4.44535	2.08367
PcyM_1351400	conserved Plasmodium protein, unknown function	0.951153	3.95894		PcyM_0413200	Sec61-gamma subunit of protein translocation complex, putative	6.5468	2.94764
PcyM_1442000	conserved Plasmodium protein, unknown function	0.362741	6.75665		PcyM_1278000	secretory complex protein 62 (SEC62)	3.07046	2.74208
PcyM_0326000	conserved Plasmodium protein, unknown function	0.470895	5.36489		PcyM_1335500	signal recognition particle RNA	10.3589	0.474287
PcyM_0510500	n.a.	0.460519	4.26798		PcyM_0218200	signal recognition particle subunit SRP9, putative (SRP9)	3.40531	1.32725
PcyM_0817600	n.a.	1.89655	4.04404		PcyM_1206000	small nuclear ribonucleoprotein E, putative (SNRPE)	3.42506	2.47133
PcyM_1142800	n.a.	0.825631	3.5363		PcyM_0931300	small nuclear ribonucleoprotein F, putative (SNRPF)	3.06693	1.00264
PcyM_0714900	n.a.	1.25347	3.28389		PcyM_0708100	small nuclear ribonucleoprotein Sm D3, putative (SNRPD3)	3.37498	0.953682
PcyM_0601100	hypothetical protein	0.551301	4.77194		PcyM_1104200	suppressor of kinetochore protein 1, putative (SKP1)	3.28072	2.19737
PcyM_1403700	hypothetical protein	0.311646	3.22444		PcyM_1451500	T-complex protein 1 subunit gamma, putative	5.45144	0.784593
PcyM_0737700	hypothetical protein, conserved	0.194269	34.2581		PcyM_1277200	thioredoxin peroxidase 1 (Trx-Px1)	4.88817	2.41534
					PcyM_1435300	thioredoxin peroxidase 2 (Trx-Px2)	3.04337	1.72081
Exported proteins					PcyM_0528600	trafficking protein particle complex subunit 3, putative (BET3)	4.4108	2.03638
PcyM_0938200	apical membrane antigen 1 (AMA1)	0.223433	5.82785		PcyM_1011500	U6 snRNA-associated Sm-like protein LSm2, putative (LSM2)	3.25669	0.984945
PcyM_0924700	circumsporozoite-related antigen (EXP1)	2.56567	17.0893		PcyM_1272500	U6 snRNA-associated Sm-like protein LSm5, putative (LSM5)	6.74726	1.68137
PcyM_0533700	cysteine-rich protective antigen, putative	0.0728918	3.01979		PcyM_1215700	U6 spliceosomal RNA	11.1238	0.335446
PcyM_0326400	early transcribed membrane protein (ETRAMP)	0.0355307	9.35625		PcyM_1353600	ubiquitin-40S ribosomal protein S27a, putative	7.39449	2.98378
PcyM_0422500	early transcribed membrane protein 2 (ETRAMP2)	1.45183	59.6769		PcyM_0719700	ubiquitin-conjugating enzyme, putative	3.13821	2.88714
PcyM_0628800	erythrocyte binding antigen-165, pseudogene (EBA165)	0.0492327	4.39167		PcyM_1032800	zinc binding protein, putative	3.13689	1.52857
PcyM_1152100	erythrocyte binding antigen-165, pseudogene (EBA165)	0.0143163	3.65782
PcyM_0312600	erythrocyte vesicle protein 1, putative (EVP1)	0.208303	4.66975		Conserved proteins, unknown function
PcyM_1240800	exported protein 2 (EXP2)	1.23428	12.6887		PcyM_0107100	conserved Plasmodium protein, unknown function	3.14234	1.33183
PcyM_1249300	fam-a protein	2.86861	10.9979		PcyM_0320800	conserved Plasmodium protein, unknown function	5.13243	1.49824
PcyM_1402700	interspersed repeat antigen (FIRA)	2.01985	96.009		PcyM_0914100	conserved Plasmodium protein, unknown function	6.1829	1.77818
PcyM_0402100	liver stage antigen 3, putative	0.0378489	6.08557		PcyM_1336600	conserved Plasmodium protein, unknown function	3.41352	1.68251
PcyM_0731200	merozoite surface protein 1 (MSP1)	1.49089	4.62953		PcyM_0838800	conserved Plasmodium protein, unknown function	3.46127	1.92581
PcyM_1031300	merozoite surface protein 3b, putative	0.185648	3.92936		PcyM_1027600	conserved Plasmodium protein, unknown function	4.4786	1.83873
PcyM_1222800	merozoite surface protein 7 (MSP7)	0.303346	3.71528		PcyM_0617500	conserved Plasmodium protein, unknown function	5.14071	1.80312
PcyM_0617400	merozoite TRAP-like protein, putative (MTRAP)	0.235179	3.99113		PcyM_1336400	conserved Plasmodium protein, unknown function	3.02837	1.82386
PcyM_0953800	merozoite-associated tryptophan-rich antigen (MaTrA)	0.090915	4.2277		PcyM_0627600	conserved Plasmodium protein, unknown function	6.02828	0.998399
PcyM_1222600	MSP7-like protein	0.720087	6.30745		PcyM_1244900	conserved Plasmodium protein, unknown function	7.65425	2.29659
PcyM_1222100	MSP7-like protein	0.61691	4.31057		PcyM_1143800	conserved Plasmodium protein, unknown function	3.21968	1.69467
PcyM_1151000	PIR protein	0.660106	3.01436		PcyM_1325400	conserved Plasmodium protein, unknown function	3.78021	1.13806
PcyM_1403000	Plasmodium exported protein (hyp11), unknown function	0.312876	10.638		PcyM_0414700	conserved Plasmodium protein, unknown function	4.02815	2.09378
PcyM_0515900	Plasmodium exported protein (PHIST), unknown function	0.0260861	9.22646		PcyM_1140700	conserved Plasmodium protein, unknown function	4.71268	2.6476
PcyM_1202700	Plasmodium exported protein (PHIST), unknown function	0.0502259	8.73651		PcyM_0709900	conserved Plasmodium protein, unknown function	3.27867	1.55162
PcyM_0601600	Plasmodium exported protein (PHIST), unknown function	0.0817653	5.09258		PcyM_0700600	conserved Plasmodium protein, unknown function	3.05494	1.60106
PcyM_0808700	Plasmodium exported protein (PHIST), unknown function	0.450215	12.4235		PcyM_1347100	conserved Plasmodium protein, unknown function	3.12133	1.64486
PcyM_0100300	Plasmodium exported protein (PHIST), unknown function	0	6.5446		PcyM_0323900	conserved Plasmodium protein, unknown function	4.12314	2.21005
PcyM_0502300	Plasmodium exported protein (PHIST), unknown function	0.0781589	4.0477		PcyM_0319500	conserved Plasmodium protein, unknown function	5.53805	2.0919
PcyM_0423100	Plasmodium exported protein (PHIST), unknown function	0	6.28003		PcyM_0952600	conserved Plasmodium protein, unknown function	5.21822	2.43384
PcyM_1202600	Plasmodium exported protein (PHIST), unknown function	0.254395	18.3449		PcyM_1111600	conserved Plasmodium protein, unknown function	3.43789	2.03523
PcyM_0808800	Plasmodium exported protein (PHIST), unknown function	1.1286	10.4683		PcyM_1419000	conserved Plasmodium protein, unknown function	3.20311	1.62308
PcyM_1259000	Plasmodium exported protein (PHIST), unknown function	0.0534569	7.95689		PcyM_0323000	conserved Plasmodium protein, unknown function	4.17699	2.39373
PcyM_0525400	Plasmodium exported protein (PHIST), unknown function	0	6.6863		PcyM_0521200	conserved Plasmodium protein, unknown function	3.32942	2.84853
PcyM_0524900	Plasmodium exported protein (PHIST), unknown function	0.0357727	6.67325		PcyM_0929700	conserved Plasmodium protein, unknown function	4.15347	1.98777
PcyM_0601700	Plasmodium exported protein (PHISTc), unknown function	0.233998	9.95915		PcyM_1021000	conserved Plasmodium protein, unknown function	3.72645	1.48304
PcyM_0121700	Plasmodium exported protein (PHISTc), unknown function	0.195818	7.87638		PcyM_0802500	conserved Plasmodium protein, unknown function	3.63198	2.17819
PcyM_0402300	Plasmodium exported protein (PHISTc), unknown function	0.108059	5.00748		PcyM_0319600	conserved Plasmodium protein, unknown function	3.59431	2.24014
PcyM_0628000	Plasmodium exported protein (PHISTc), unknown function (GEXP12)	0.0018652	5.69519		PcyM_0121100	conserved Plasmodium protein, unknown function	3.48623	1.78549
PcyM_0525300	Plasmodium exported protein (PHISTc), unknown function (GEXP20)	0.091645	6.07832		PcyM_0511900	conserved Plasmodium protein, unknown function	5.02281	1.70875
PcyM_0422900	Plasmodium exported protein, unknown function	0.219395	6.48539		PcyM_0509800	conserved Plasmodium protein, unknown function	3.66298	2.1136
PcyM_0123400	Plasmodium exported protein, unknown function	0.681253	3.78012		PcyM_0917300	conserved Plasmodium protein, unknown function (PCAS_091160:exon:5)	3.71743	2.24718
PcyM_1402900	Plasmodium exported protein, unknown function	0	3.93202		PcyM_1138200	unspecified product	3.76592	1.98207
PcyM_0502400	Plasmodium exported protein, unknown function	0	4.53962		PcyM_1227600	unspecified product	4.5394	2.14655
PcyM_0423300	Plasmodium exported protein, unknown function	1.76072	111.767		PcyM_MT03200	n.a.	42.5689	0.418054
PcyM_1401700	Plasmodium exported protein, unknown function	0.0491338	3.55628		PcyM_0605000	n.a.	3.09955	2.00633
PcyM_1150800	Plasmodium exported protein, unknown function	0.494845	14.2174		PcyM_MT01900	n.a.	15.8187	0.351034
PcyM_0842400	Plasmodium exported protein, unknown function	0.033495	6.51955		PcyM_MT02800	n.a.	23.898	0.940706
PcyM_1477600	Plasmodium exported protein, unknown function	0.231053	6.04138		PcyM_MT00700	n.a.	14.6043	0.250388
PcyM_0842300	Plasmodium exported protein, unknown function	0.00140382	6.41635		PcyM_1013000	n.a.	4.26541	1.47087
PcyM_0402200	Plasmodium exported protein, unknown function	0.0809573	3.29508		PcyM_1412500	n.a.	4.15241	1.85315
PcyM_0801100	Plasmodium exported protein, unknown function	0	4.92869		PcyM_0060600	n.a.	3.30268	0.0208413
PcyM_0203800	Plasmodium exported protein, unknown function	0.0460299	3.16319		PcyM_1276400	n.a.	4.16863	2.34727
PcyM_1203100	Plasmodium exported protein, unknown function	0.481313	4.57671		PcyM_MT02000	n.a.	6.0513	0.0372639
PcyM_1401800	Plasmodium exported protein, unknown function	0	3.97701		PcyM_MT00500	n.a.	7.27137	0.0211119
PcyM_1150300	Plasmodium exported protein, unknown function	0.321869	4.50692		PcyM_0324000	n.a.	4.23174	2.12446
PcyM_1202800	Plasmodium exported protein, unknown function	0.00327151	3.68786		PcyM_MT02700	n.a.	6.82882	0.00534026
PcyM_0303700	Plasmodium exported protein, unknown function	0	3.54586
PcyM_0327000	Plasmodium exported protein, unknown function	0	3.43377		Exported proteins
PcyM_0525100	RAD protein (Pv-fam-e)	0.0848703	4.88672		PcyM_1223200	MSP7-like protein (MSRP5)	3.36483	2.17993
PcyM_0304600	RAD protein (Pv-fam-e)	0.00236158	5.84629
PcyM_0524500	RAD protein (Pv-fam-e)	0.115322	6.72932
PcyM_0700500	reticulocyte binding protein 1b (RBP1b)	0.129053	3.62639
PcyM_0535200	reticulocyte binding protein 2 precursor (PvRBP-2), putative	0.249756	7.51674
PcyM_0535100	reticulocyte binding protein homologue 3, pseudogene (RH3)	0.0896886	3.66303
PcyM_1034100	rhoptry-associated protein 2/3 (RAP2/3)	0.411495	3.07339
PcyM_0400400	S-antigen, putative	0	4.12594
PcyM_1211300	thioredoxin 2 (TRX2)	2.60271	3.8538
PcyM_1420600	translocation protein SEC63 (SEC63)	1.14447	3.42198
PcyM_1315200	translocon component PTEX150, putative (PTEX150)	1.29482	13.9494
PcyM_0907400	translocon component PTEX88 (PTEX88)	1.37793	8.18121
PcyM_0534100	tryptophan/threonine-rich antigen	0	4.26472
PcyM_0502700	tryptophan/threonine-rich antigen, putative	0.0488086	4.13441
PcyM_1402300	tryptophan-rich antigen	0.72883	10.4143
PcyM_0700300	tryptophan-rich antigen	0.654502	7.12405
PcyM_0401500	tryptophan-rich antigen	0.991025	3.32162
PcyM_0502100	tryptophan-rich antigen	0.113214	4.6137
PcyM_0050900	tryptophan-rich antigen	0.051801	3.96805
PcyM_1203000	tryptophan-rich antigen, pseudogene	0.0844289	3.34541
PcyM_0700200	tryptophan-rich antigen, putative	0.084179	4.47987
PcyM_0013100	tryptophan-rich antigen, putative	0	3.89267
PcyM_0012700	tryptophan-rich antigen, putative	0.0661223	3.83271
PcyM_1034500	tryptophan-rich antigen, putative	1.68588	22.7525
