# Supplementary material for: Transcriptomic analysis reveals reduced transcriptional activity in the malaria parasite Plasmodium cynomolgi during progression into dormancy
Source: eLife. 2018 Dec 27;7:e41081. doi: 10.7554/eLife.41081 (PMC6344078; doi:10.7554/eLife.41081)
Supplement: Supplementary file 3. [file elife-41081-supp3.xlsx]

## Sheet: Sheet1
Supplementary file 3: Genes with expression vaues ≥ 10 FPKM in hypnozoite samples at day 9 and/or day 10, related to Figure 1.
Genes expressed >=10FPKM in HYP Day 6/7 and Day 9 samples
Gene ID	Annotation	MEAN HZ Day 6/7 [Avg. FPKM]	HZ Day 9 [Avg. FPKM]
PcyM_1466900	translation initiation factor SUI1, putative	356.675	28.5635
PcyM_0503000	0	115.156	101.231
PcyM_0801500	0	19.2916	15.2536
PcyM_0627400	antigen UB05, putative	91.5357	15.674
PcyM_1250000	glyceraldehyde-3-phosphate dehydrogenase (GAPDH)	182.926	17.2614
PcyM_0701600	60S ribosomal protein L32, putative (RPL32)	10.4951	15.5314
PcyM_0948800	40S ribosomal protein S21, putative (RPS21)	29.6312	17.1422
PcyM_1112800	40S ribosomal protein S15, putative (RPS15)	22.3233	14.0784
PcyM_1458400	conserved Plasmodium protein, unknown function	13.8059	20.8235
PcyM_1114600	elongation factor 1-alpha (EF-1alpha)	13.6206	11.3978
PcyM_1114700	elongation factor 1-alpha (EF-1alpha)	17.0821	10.4996
PcyM_MT03200	0	12.5924	27.7783
PcyM_1132800	histone H3 variant, putative (H3.3)	976.86	34.1427
PcyM_0503100	0	247.234	147.706
PcyM_1235900	60S ribosomal protein L23 (RPL23)	18.9343	11.3641
PcyM_0326100	0	321.42	21.8012
PcyM_1458200	conserved Plasmodium protein, unknown function	32.643	15.9429
PcyM_0906800	histone H4, putative	580.451	135.192
PcyM_MT02100	0	28.0393	50.4255
PcyM_0906900	histone H2B, putative (H2B)	518.605	71.367
PcyM_0837300	40S ribosomal protein S23, putative	24.5677	13.1901
Genes expressed >=10FPKM in HYP Day 9 sample only
Gene ID	Annotation	MEAN HZ Day 6/7 [Avg. FPKM]	HZ Day 9 [Avg. FPKM]
PcyM_1252500	60S ribosomal protein L27 (RPL27)	9.33143	11.9699
PcyM_MT01900	0	2.67057	10.3213
PcyM_MT02800	0	5.46602	15.6078
PcyM_1139600	60S ribosomal protein L39, putative	2.57243	11.0163
PcyM_0834100	60S acidic ribosomal protein P2, putative	5.76976	14.2213
PcyM_0904900	60S acidic ribosomal protein P1, putative	2.51689	16.4083
PcyM_1133000	histone H2A, putative (H2A)	4.22402	25.0575
PcyM_0820800	histone H2A variant, putative (H2A.Z)	2.53765	17.7265
PcyM_1413500	M1-family alanyl aminopeptidase (M1AAP)	4.15025	19.0539
Genes expressed >=10FPKM in HYP Day 6/7 sample only
Gene ID	Annotation	MEAN HZ Day 6/7 [Avg. FPKM]	HZ Day 9 [Avg. FPKM]
PcyM_1451400	macrophage migration inhibitory factor (MIF)	21.9689	9.69198
PcyM_1132400	ribosomal protein L27a, putative	91.0491	9.53257
PcyM_1261400	co-chaperone p23 (P23)	56.9192	9.12633
PcyM_0515400	heat shock protein 70 (HSP70)	41.998	8.95949
PcyM_1347700	40S ribosomal protein S8e, putative	70.2589	8.35731
PcyM_1132200	malate dehydrogenase, putative (MDH)	14.5659	8.07947
PcyM_0802900	40S ribosomal protein S20e, putative	16.5804	8.06333
PcyM_1409900	40S ribosomal protein S27 (RPS27)	199.623	7.94373
PcyM_1466000	40S ribosomal protein S17, putative	13.3384	7.73523
PcyM_0818300	40S ribosomal protein S3A, putative	31.0676	7.46487
PcyM_1215600	60S ribosomal protein L18, putative	63.772	7.39984
PcyM_0907200	40S ribosomal protein S4, putative	14.0694	7.09357
PcyM_1419500	40S ribosomal protein S19 (RPS19)	45.7378	6.9909
PcyM_0610100	CDGSH iron-sulfur domain-containing protein, putative	70.8942	6.97957
PcyM_1012500	40S ribosomal protein S24 (RPS24)	10.6565	6.96038
PcyM_1335500	0	24.6763	6.76141
PcyM_0320100	40S ribosomal protein S10, putative	18.4417	6.51865
PcyM_0209100	proteasome subunit beta type-3, putative	49.3559	6.4658
PcyM_1215500	60S ribosomal protein L18-2, putative	34.3733	6.44904
PcyM_0307500	6-cysteine protein (LISP2)	15.6049	6.40854
PcyM_1236300	60S ribosomal protein L6, putative	10.459	6.29283
PcyM_0627800	0	190.008	5.94284
PcyM_1110700	falcilysin (FLN)	10.0241	5.65064
PcyM_0503400	0	61.5396	5.62536
PcyM_0733500	profilin, putative (PFN)	10.4629	5.55059
PcyM_1003500	proteasome maturation factor UMP1, putative (UMP1)	10.7938	5.11469
PcyM_1244900	conserved Plasmodium protein, unknown function	21.3244	5.00863
PcyM_0415000	acyl carrier protein, putative (ACP)	13.692	4.86738
PcyM_1302700	high mobility group protein B1, putative (HMGB1)	29.8239	4.84068
PcyM_0321500	conserved Plasmodium protein, unknown function	69.4468	4.79831
PcyM_0520800	eukaryotic translation initiation factor 3 subunit G, putative (EIF3G)	28.4402	4.67767
PcyM_1214800	40S ribosomal protein S6	14.886	4.54788
PcyM_1140100	conserved Plasmodium protein, unknown function	15.6741	4.52049
PcyM_0818200	translation machinery-associated protein 7, putative (TMA7)	10.821	4.44472
PcyM_1251700	0	69.7154	4.43246
PcyM_1272500	U6 snRNA-associated Sm-like protein LSm5, putative (LSM5)	18.1876	4.42355
PcyM_0109400	heat shock protein 90, putative (HSP90)	13.6904	4.39504
PcyM_0505300	protein disulfide isomerase	25.7963	4.07664
PcyM_0112100	60S ribosomal protein L34 (RPL34)	26.4401	4.04795
PcyM_0528200	eukaryotic translation initiation factor 3 subunit M, putative (EIF3M)	13.0601	4.02493
PcyM_0321900	40S ribosomal protein S5, putative	20.2846	3.98814
PcyM_MT02000	0	11.5623	3.94621
PcyM_0627600	conserved Plasmodium protein, unknown function	23.9533	3.9395
PcyM_1030600	actin-depolymerizing factor 1 (ADF1)	23.209	3.87208
PcyM_0839900	60S ribosomal protein L44, putative (RPL44)	20.9021	3.82948
PcyM_1140600	transketolase, putative (TK)	62.638	3.76565
PcyM_1225700	60S ribosomal protein L23, putative	87.2046	3.6973
PcyM_1203500	thioredoxin-related protein, putative	62.7725	3.38866
PcyM_0617500	conserved Plasmodium protein, unknown function	12.1067	3.36818
PcyM_0511900	conserved Plasmodium protein, unknown function	49.6864	3.3073
PcyM_1277200	thioredoxin peroxidase 1 (Trx-Px1)	33.0152	3.21323
PcyM_0616200	60S ribosomal protein L3, putative (RPL3)	14.9183	3.20131
PcyM_0325800	mago nashi protein homologue, putative	11.3777	3.18542
PcyM_1122700	protein DJ-1, putative (DJ1)	39.3896	3.17968
PcyM_0825700	inorganic pyrophosphatase, putative	18.2447	3.15764
PcyM_1027600	conserved Plasmodium protein, unknown function	14.8304	2.94372
PcyM_1465000	replication factor C subunit 4, putative (RFC4)	49.9028	2.91285
PcyM_0528600	trafficking protein particle complex subunit 3, putative (BET3)	43.8992	2.89811
PcyM_1318000	microsomal signal peptidase protein, putative	73.6939	2.87687
PcyM_1141000	histone H3, putative	13.9293	2.82815
PcyM_1312300	heat shock protein DNAJ homologue Pfj4, putative	11.4747	2.77344
PcyM_1440900	heterochromatin protein 1 (HP1)	17.0209	2.76755
PcyM_1276400	0	12.3799	2.75011
PcyM_0323000	conserved Plasmodium protein, unknown function	144.093	2.74278
PcyM_0808300	tubulin beta chain	12.2954	2.72832
PcyM_1233400	mitochondrial fission 1 protein, putative (FIS1)	85.6316	2.68305
PcyM_1304400	eukaryotic translation initiation factor 5A, putative (EIF5A)	15.0396	2.67608
PcyM_1264000	E3 SUMO-protein ligase NSE2, putative (NSE2)	39.8429	2.6756
PcyM_0113000	coatomer subunit epsilon, putative (SEC28)	42.8323	2.64745
PcyM_1350400	ribonucleotide reductase small subunit, putative	13.9053	2.61516
PcyM_1435600	10 kDa chaperonin (CPN10)	17.7283	2.58959
PcyM_1301900	conserved protein, unknown function	48.3421	2.52961
PcyM_1343100	nuclear transport factor 2, putative (NTF2)	62.3096	2.48529
PcyM_0811700	proteasome subunit beta type-5	47.1842	2.48106
PcyM_0316100	eukaryotic translation initiation factor 3 subunit I, putative (EIF3I)	34.9061	2.45615
PcyM_1021000	conserved Plasmodium protein, unknown function	89.8818	2.44407
PcyM_0610700	HORMA domain protein, putative	10.5635	2.43376
PcyM_0120400	1-cys peroxiredoxin (1-CysPxn)	27.1254	2.41199
PcyM_0319600	conserved Plasmodium protein, unknown function	20.7015	2.36336
PcyM_0838800	conserved Plasmodium protein, unknown function	38.965	2.27904
PcyM_0830500	26S proteasome regulatory subunit RPN12, putative (RPN12)	17.5205	2.27449
PcyM_0218200	signal recognition particle subunit SRP9, putative (SRP9)	10.7145	2.23137
PcyM_0615200	biotin--acetyl-CoA-carboxylase, putative	30.9027	2.18629
PcyM_1412600	mitochondrial ribosomal protein S15 precursor, putative	19.742	2.18368
PcyM_0821800	0	89.1849	2.18141
PcyM_0213400	4-hydroxy-3-methylbut-2-enyl diphosphate reductase, putative (LytB)	22.5618	2.16834
PcyM_1301100	liver stage associated protein 1 (LSAP1)	17.4757	2.16064
PcyM_1021100	prefoldin subunit, putative	44.4729	2.13496
PcyM_1321700	NADP-specific glutamate dehydrogenase, putative (GDH2)	11.508	2.09857
PcyM_1032800	zinc binding protein, putative	80.8948	2.06857
PcyM_0719700	ubiquitin-conjugating enzyme, putative	15.6918	2.06633
PcyM_0107100	conserved Plasmodium protein, unknown function	19.1547	2.06169
PcyM_1347100	conserved Plasmodium protein, unknown function	12.2254	2.05768
PcyM_0605000	0	71.4241	2.04256
PcyM_1278000	secretory complex protein 62 (SEC62)	17.5604	2.02236
PcyM_0931300	small nuclear ribonucleoprotein F, putative (SNRPF)	24.5609	2.01445
PcyM_0212600	conserved Plasmodium protein, unknown function	29.8675	1.95923
PcyM_0837900	glutaredoxin 1, putative (GRX1)	40.3962	1.95464
PcyM_0210200	0	63.0831	1.95245
PcyM_1225900	0	17.043	1.95091
PcyM_0906200	conserved Plasmodium protein, unknown function	11.4021	1.95057
PcyM_0613800	conserved Plasmodium protein, unknown function	72.5117	1.94703
PcyM_1251600	0	269.032	1.90814
PcyM_1138100	conserved Plasmodium protein, unknown function	11.5745	1.89742
PcyM_1144000	diphthine methyltransferase, putative (DPH7)	11.8236	1.878
PcyM_1433000	unspecified product	29.3772	1.86489
PcyM_0914700	conserved protein, unknown function	40.3178	1.85393
PcyM_1310400	ATP synthase mitochondrial F1 complex assembly factor 1, putative (ATP11)	66.201	1.83583
PcyM_0326200	0	209.902	1.82892
PcyM_0204000	0	209.727	1.82695
PcyM_0829600	conserved Plasmodium protein, unknown function	15.6073	1.81935
PcyM_1242200	conserved Plasmodium protein, unknown function	41.9196	1.81872
PcyM_1142500	citrate synthase-like protein, putative	24.7124	1.7924
PcyM_0603800	0	41.6715	1.78097
PcyM_1334500	conserved Plasmodium protein, unknown function	14.6533	1.77763
PcyM_0704900	conserved Plasmodium protein, unknown function	47.5858	1.75675
PcyM_1228200	0	36.728	1.74002
PcyM_0735400	mitochondrial-processing peptidase subunit beta, putative (MAS1)	690.19	1.71202
PcyM_1435000	conserved Plasmodium protein, unknown function	14.7876	1.70348
PcyM_1242300	mediator of RNA polymerase II transcription subunit 6, putative	87.6439	1.6833
PcyM_1428200	conserved Plasmodium protein, unknown function	12.1203	1.67706
PcyM_1027900	60S ribosomal subunit protein L24, putative	26.861	1.667
PcyM_1352200	serine/threonine protein phosphatase CPPED1, putative (CPPED1)	14.7247	1.6651
PcyM_1112200	CUGBP Elav-like family member 1, putative (CELF1)	19.6598	1.6621
PcyM_0321800	conserved Plasmodium protein, unknown function	15.1409	1.65608
PcyM_1305800	conserved Plasmodium protein, unknown function	13.5502	1.63522
PcyM_0514200	U6 snRNA-associated Sm-like protein LSm3, putative (LSM3)	25.7732	1.62184
PcyM_0736300	0	15.4697	1.61506
PcyM_1227500	conserved Plasmodium protein, unknown function	32.601	1.58645
PcyM_1219000	26S proteasome regulatory subunit RPN3, putative (RPN3)	12.64	1.57401
PcyM_0810900	dolichyl-phosphate-mannose protein mannosyltransferase, putative	30.8403	1.57002
PcyM_1421800	rhoptry protein 2, putative (PRP2)	18.7261	1.56522
PcyM_1455000	cytochrome b5, putative	12.4672	1.56499
PcyM_1437800	conserved Plasmodium protein, unknown function	23.0302	1.56431
PcyM_0109300	EKC/KEOPS complex subunit BUD32, putative (BUD32)	15.7829	1.55746
PcyM_0527200	memo-like protein	41.8713	1.53306
PcyM_0710900	conserved Plasmodium protein, unknown function	74.7962	1.5292
PcyM_1004700	transmembrane emp24 domain-containing protein, putative	42.4488	1.52196
PcyM_1144900	uroporphyrinogen III decarboxylase, putative (UROD)	28.2202	1.51293
PcyM_1471000	FK506-binding protein (FKBP)-type peptidyl-prolyl isomerase (FKBP35)	23.0532	1.50081
PcyM_1423800	conserved Plasmodium protein, unknown function	35.6615	1.49737
PcyM_1009000	G10 protein, putative	14.8802	1.4916
PcyM_0818800	iron-sulfur assembly protein, putative (IscA2)	10.9131	1.49049
PcyM_1302200	peptidyl-prolyl cis-trans isomerase, putative (CYP26)	42.9388	1.49039
PcyM_1404600	methyltransferase-like protein, putative	10.2835	1.48986
PcyM_1002300	apicoplast TIC22 protein (TIC22)	28.0485	1.48521
PcyM_1227300	0	27.7106	1.47226
PcyM_1425500	calcium/calmodulin-dependent protein kinase, putative	25.3508	1.47142
PcyM_0701700	GTPase-activating protein, putative	26.9465	1.46005
PcyM_1263600	calcineurin subunit B (CNB)	13.5877	1.45662
PcyM_0610800	conserved Plasmodium protein, unknown function	16.2282	1.45557
PcyM_0208700	conserved Plasmodium protein, unknown function	100.153	1.45031
PcyM_1260300	6-phosphogluconate dehydrogenase, decarboxylating, putative	27.6498	1.44263
PcyM_1010100	DEAD/DEAH box ATP-dependent RNA helicase, putative	10.0007	1.41957
PcyM_0512000	0	40.3704	1.41855
PcyM_1266500	conserved Plasmodium protein, unknown function	18.2108	1.41698
PcyM_0939700	coatomer subunit delta, putative	13.8833	1.393
PcyM_0419100	conserved Plasmodium protein, unknown function	12.2249	1.35759
PcyM_0913200	replication factor C subunit 5, putative (RFC5)	14.1084	1.35352
PcyM_1145000	RING zinc finger protein, putative	38.6578	1.34782
PcyM_0726900	conserved Plasmodium protein, unknown function	23.1991	1.34695
PcyM_1207200	nucleoside diphosphate hydrolase, putative	12.7419	1.3331
PcyM_0906500	RNA polymerase subunit, putative	58.9997	1.33081
PcyM_1127900	conserved Plasmodium protein, unknown function	20.8688	1.31945
PcyM_0716300	secreted acid phosphatase, putative (GAP50)	12.6508	1.31885
PcyM_0713800	conserved Plasmodium protein, unknown function	37.6144	1.30985
PcyM_1241600	mitochondrial pyruvate carrier protein 2, putative (MPC2)	13.188	1.30148
PcyM_0526200	prohibitin-like protein, putative	28.5363	1.29203
PcyM_0704000	vacuolar protein sorting-associated protein 46, putative (VPS46)	13.5408	1.27088
PcyM_0506800	SNARE protein, putative	69.696	1.26594
PcyM_1138300	nucleolar GTP-binding protein 1, putative	16.5918	1.26377
PcyM_0419400	PCI domain-containing protein, putative	25.6936	1.26176
PcyM_1220600	nuclear movement protein, putative (NUDC)	10.8295	1.26175
PcyM_1416000	conserved Plasmodium protein, unknown function	19.2796	1.26004
PcyM_0814000	conserved Plasmodium protein, unknown function	25.8485	1.25828
PcyM_0503200	Senescence-associated protein, putative	344.85	1.25616
PcyM_1007800	karyopherin beta (KASbeta)	14.3229	1.24667
PcyM_0409700	conserved Plasmodium protein, unknown function	18.7373	1.2326
PcyM_1477400	Plasmodium exported protein, unknown function	11.7411	1.23084
PcyM_0939200	conserved Plasmodium protein, unknown function	16.7297	1.22422
PcyM_1268400	conserved Plasmodium protein, unknown function	10.4667	1.22382
PcyM_1233300	conserved Plasmodium protein, unknown function	14.5795	1.21862
PcyM_1232900	conserved Plasmodium protein, unknown function	62.7202	1.21781
PcyM_1447200	haloacid dehalogenase-like hydrolase, putative (HAD2)	23.8079	1.21335
PcyM_1313100	peripheral plastid protein 1, putative (PPP1)	19.7723	1.20976
PcyM_1226800	elongation factor Tu, putative	13.3322	1.20208
PcyM_1131900	trafficking protein particle complex subunit 6A, putative	12.4247	1.19229
PcyM_0837500	0	42.5786	1.18919
PcyM_0421700	ERCC1 nucleotide excision repair protein, putative (ERCC1)	11.1798	1.18603
PcyM_0306400	6-cysteine protein (P36)	20.7557	1.16807
PcyM_1409300	fork head domain protein, putative	14.7535	1.16281
PcyM_1470800	conserved Plasmodium protein, unknown function	96.686	1.16262
PcyM_0614900	0	25.3788	1.15099
PcyM_1225200	nucleotidyltransferase, putative	14.997	1.14882
PcyM_1302500	conserved Plasmodium protein, unknown function	11.725	1.14796
PcyM_1135600	enoyl-acyl carrier reductase (ENR)	16.6818	1.14633
PcyM_0716800	0	18.4422	1.14514
PcyM_1454900	dihydrolipoyl dehydrogenase, mitochondrial (LPD1)	18.77	1.1395
PcyM_1475200	conserved Plasmodium protein, unknown function	15.8242	1.1391
PcyM_0414900	0	17.8096	1.13503
PcyM_1274000	RNA polymerase II transcription factor B subunit 5, putative (TFB5)	36.1874	1.1281
PcyM_1116000	splicing factor 3B subunit 5, putative (SF3B5)	16.5201	1.12106
PcyM_1013100	histone RNA hairpin-binding protein, putative (SLBP)	40.8991	1.11676
PcyM_0627100	enhancer of rudimentary homolog, putative	27.0948	1.11496
PcyM_1106500	DNA-directed RNA polymerase II, putative	27.8417	1.10429
PcyM_1347800	conserved Plasmodium protein, unknown function	10.1343	1.09832
PcyM_0928400	pyruvate dehydrogenase E1 component subunit alpha (pdhA)	13.1824	1.08418
PcyM_1456900	homocysteine S-methyltransferase, putative	35.8586	1.07766
PcyM_0704600	leucine-rich repeat protein (LRR9)	21.4525	1.07562
PcyM_0702700	conserved Plasmodium protein, unknown function	20.2379	1.07532
PcyM_0413900	2C-methyl-D-erythritol 2,4-cyclodiphosphate synthase, putative (IspF)	34.9441	1.06977
PcyM_1216000	mitochondrial pyruvate carrier protein 1, putative (MPC1)	17.7459	1.06766
PcyM_1004500	ubiquitin-conjugating enzyme E2 N, putative (UBC13)	99.2582	1.06478
PcyM_1304800	conserved Plasmodium protein, unknown function	13.2008	1.06469
PcyM_1316600	cytochrome c oxidase assembly protein, putative	32.0434	1.05829
PcyM_0918900	guanine nucleotide-exchange factor SEC12, putative (SEC12)	31.523	1.05784
PcyM_1419100	conserved Plasmodium protein, unknown function	35.7971	1.05524
PcyM_0826400	0	13.7921	1.05446
PcyM_1308500	conserved Plasmodium protein, unknown function	44.5894	1.05263
PcyM_0518400	conserved Plasmodium protein, unknown function	33.5473	1.02483
PcyM_0907300	centrin-4, putative (CEN4)	25.2174	1.01869
PcyM_1310600	50S ribosomal protein L1, apicoplast, putative (RPL1)	18.9165	1.01836
PcyM_0952800	conserved Plasmodium protein, unknown function	12.6468	1.00928
PcyM_1264400	acetyl-CoA acetyltransferase, putative	25.7148	1.00683
PcyM_0703400	autophagy-related protein 3, putative (ATG3)	12.0911	1.00118
PcyM_0106600	importin-7, putative	22.3633	0.990234
PcyM_1423000	conserved protein, unknown function	28.3521	0.986174
PcyM_0825500	kinetochore protein NUF2, putative (NUF2)	10.4844	0.984738
PcyM_0610500	0	14.9494	0.984484
PcyM_0503600	early transcribed membrane protein 8 (ETRAMP8)	15.2129	0.9813
PcyM_1007600	conserved Plasmodium membrane protein, unknown function	14.2183	0.980431
PcyM_1032600	4-diphosphocytidyl-2-C-methyl-D-erythritol kinase, putative (IspE)	29.5013	0.976003
PcyM_0810800	eukaryotic translation initiation factor 2 beta subunit, putative	17.6281	0.973084
PcyM_0312900	conserved Plasmodium protein, unknown function	24.6171	0.954218
PcyM_0611900	conserved Plasmodium protein, unknown function	20.0833	0.951597
PcyM_1415000	peptidyl-prolyl cis-trans isomerase, putative	21.1087	0.950384
PcyM_1419900	glycerol-3-phosphate 1-O-acyltransferase, putative (G3PAT)	16.0177	0.950351
PcyM_0508100	conserved protein, unknown function	34.6797	0.950105
PcyM_0510900	conserved Plasmodium protein, unknown function	30.252	0.941865
PcyM_1412700	protein ISD11, putative (ISD11)	14.4155	0.94085
PcyM_0914000	conserved Plasmodium protein, unknown function	18.7668	0.939474
PcyM_1255900	vacuolar protein sorting-associated protein 4 (VPS4)	12.4604	0.934498
PcyM_1318900	conserved Plasmodium protein, unknown function	11.2165	0.931682
PcyM_0704500	zinc finger protein, putative	67.164	0.929271
PcyM_0810200	ribosomal protein L43, mitochondrial, putative	24.375	0.92688
PcyM_0519500	trafficking protein particle complex subunit 2-like protein, putative (TRAPPC2L)	12.8749	0.920576
PcyM_1256800	conserved Plasmodium protein, unknown function	10.926	0.907523
PcyM_1316500	ribonuclease H2 subunit B, putative	81.0124	0.904007
PcyM_1241400	RAP protein, putative	11.6484	0.898061
PcyM_1143900	0	10.2641	0.894394
PcyM_1463800	hydroxyethylthiazole kinase (ThzK)	25.6961	0.8928
PcyM_0823800	stomatin-like protein	82.1848	0.88447
PcyM_1133100	conserved Plasmodium protein, unknown function	12.4346	0.881329
PcyM_1220800	conserved Plasmodium protein, unknown function	39.7265	0.87862
PcyM_1120500	amino acid transporter, putative	52.2842	0.878446
PcyM_0532600	conserved Plasmodium protein, unknown function	12.7721	0.875802
PcyM_0836700	conserved protein, unknown function	12.8734	0.874525
PcyM_1318700	H/ACA ribonucleoprotein complex subunit 3, putative (NOP10)	13.121	0.874314
PcyM_0735200	conserved Plasmodium protein, unknown function	24.2304	0.871676
PcyM_0616600	zinc finger, C3HC4 type, putative	41.7421	0.868263
PcyM_1249100	cyclin homologue (CYC1)	14.4263	0.867722
PcyM_1141200	pre-mRNA-splicing factor SLU7, putative (SLU7)	18.394	0.862032
PcyM_0312300	peptide chain release factor 2, putative	10.288	0.854214
PcyM_1411100	H/ACA ribonucleoprotein complex subunit 1, putative (GAR1)	17.1722	0.853352
PcyM_0711100	26S proteasome regulatory subunit RPN8, putative (RPN8)	10.1604	0.845452
PcyM_1142400	conserved Plasmodium protein, unknown function	13.5958	0.843098
PcyM_1331900	copper transporter, putative	16.9036	0.841785
PcyM_1116900	DNA replication licensing factor MCM6, putative (MCM6)	19.0078	0.835149
PcyM_1212900	UDP-N-acetylglucosamine pyrophosphorylase, putative	12.4872	0.834106
PcyM_0708900	SNARE protein, putative	23.4233	0.833566
PcyM_0828600	conserved Plasmodium protein, unknown function	16.1287	0.828681
PcyM_1210700	isocitrate dehydrogenase [NADP], mitochondrial (IDH)	10.5765	0.826111
PcyM_0822800	E3 ubiquitin-protein ligase RBX1, putative (RBX1)	11.6212	0.822546
PcyM_1121000	nicotinate phosphoribosyltransferase, putative (NAPRT)	10.8232	0.821203
PcyM_1026000	0	19.7875	0.818175
PcyM_0908200	conserved Plasmodium protein, unknown function	14.0184	0.816332
PcyM_0419200	conserved Plasmodium protein, unknown function	15.1175	0.814378
PcyM_1228500	0	56.4895	0.811995
PcyM_0531500	steroid dehydrogenase, putative	23.5756	0.810271
PcyM_1114100	DNA helicase, putative	25.8797	0.808567
PcyM_0315100	phosphopantothenoylcysteine synthetase, putative	15.6637	0.807856
PcyM_0914400	ubiquinone biosynthesis protein COQ4, putative (COQ4)	48.71	0.806625
PcyM_1229200	transcriptional regulatory protein sir2a (SIR2A)	34.4916	0.8013
PcyM_0829000	GTP-binding protein, putative	16.7733	0.799236
PcyM_1413400	cytochrome c2 precursor, putative	14.0748	0.797837
PcyM_1306400	shewanella-like protein phosphatase 2, putative (SHLP2)	11.1317	0.79684
PcyM_1124700	conserved Plasmodium protein, unknown function	28.2377	0.796689
PcyM_0914600	conserved Plasmodium protein, unknown function	18.9829	0.794934
PcyM_0626000	phosducin-like protein, putative (PhLP2)	31.9457	0.794872
PcyM_0509000	conserved Plasmodium protein, unknown function	38.9737	0.791633
PcyM_1444300	50S ribosomal protein L24, putative	38.0974	0.780634
PcyM_0309400	methyltransferase, putative	22.9579	0.778316
PcyM_0836300	conserved Plasmodium protein, unknown function	12.3814	0.769455
PcyM_1466500	conserved Plasmodium protein, unknown function	14.7737	0.765839
PcyM_1434600	geranylgeranyl transferase type2 beta subunit, putative	44.0513	0.762008
PcyM_0835100	0	14.5801	0.761887
PcyM_1307200	conserved Plasmodium protein, unknown function	168.208	0.761288
PcyM_1408400	U1 small nuclear ribonucleoprotein A, putative	14.3827	0.760857
PcyM_0952000	protein YIPF6, putative	12.3729	0.755439
PcyM_0717900	protein disulfide isomerase, putative	13.5339	0.754608
PcyM_1005300	nucleolar Jumonji domain interacting protein, putative	36.2595	0.749135
PcyM_1345000	conserved Plasmodium protein, unknown function	10.0174	0.748825
PcyM_0735700	delta tubulin, putative	20.6021	0.74562
PcyM_0908000	conserved Plasmodium protein, unknown function	22.3788	0.744658
PcyM_1322700	mitochondrial ribosomal protein L15 precursor, putative	25.8064	0.743569
PcyM_1018500	aspartate--tRNA ligase, putative	10.6629	0.743307
PcyM_1123300	mitochondrial ribosomal protein L46 precursor, putative	23.5168	0.738388
PcyM_1239800	protein transport protein YIP1, putative (YIP1)	25.9826	0.737584
PcyM_1135500	conserved Plasmodium protein, unknown function	13.9963	0.73466
PcyM_1009500	S-adenosylmethionine-dependent methyltransferase, putative	29.3992	0.734415
PcyM_1458600	CCR4-NOT transcription complex subunit 4, putative (NOT4)	21.1355	0.733205
PcyM_1132500	conserved Plasmodium protein, unknown function	40.6661	0.730309
PcyM_1431300	aquaporin, putative (AQP2)	10.4349	0.730207
PcyM_1351700	mitochondrial ribosomal protein L16 precursor, putative	23.2859	0.723231
PcyM_1205600	conserved Plasmodium protein, unknown function	25.1323	0.722744
PcyM_1429600	conserved Plasmodium protein, unknown function	49.4554	0.721067
PcyM_0204900	0	45.0817	0.71932
PcyM_1270300	conserved Plasmodium protein, unknown function	11.0152	0.717273
PcyM_0218900	conserved Plasmodium protein, unknown function	20.3807	0.713243
PcyM_1447800	ataxin-3, putative (ATX3)	32.4528	0.712396
PcyM_1273100	conserved Plasmodium protein, unknown function	19.9869	0.702901
PcyM_0616500	protoporphyrinogen oxidase, putative (PPO)	19.8909	0.696334
PcyM_0718200	TLD domain-containing protein	17.1286	0.69399
PcyM_0720300	conserved Plasmodium protein, unknown function	14.6908	0.692369
PcyM_1120300	conserved Plasmodium protein, unknown function	21.6883	0.688021
PcyM_0828300	co-chaperone p23, putative	33.4277	0.685391
PcyM_0910200	D-tyrosyl-tRNA(Tyr) deacylase, putative (DTD)	46.14	0.684309
PcyM_1327300	conserved Plasmodium protein, unknown function	17.5311	0.675403
PcyM_1466200	mitochondrial import inner membrane translocase subunit TIM13, putative (TIM13)	25.2099	0.667502
PcyM_1018800	tubulin--tyrosine ligase, putative	20.6008	0.667181
PcyM_1239900	pre-mRNA-splicing factor ISY1, putative	41.9229	0.665176
PcyM_1121100	conserved Plasmodium protein, unknown function	15.8946	0.663609
PcyM_1208100	step II splicing factor, putative	12.9915	0.663581
PcyM_1135900	endonuclease III homologue, putative	17.3924	0.659287
PcyM_1301800	ATP dependent RNA helicase, putative	28.3463	0.655314
PcyM_0838600	AP endonuclease (DNA-[apurinic or apyrimidinic site] lyase), putative	10.3199	0.65516
PcyM_0923900	heat shock factor-binding protein 1, putative (HSBP)	10.1144	0.653048
PcyM_1338700	zinc finger protein, putative	46.0493	0.650811
PcyM_1427900	translation initiation factor SUI1, putative	10.0502	0.647299
PcyM_0213900	thrombospondin related sporozoite protein (TRSP)	26.8676	0.643391
PcyM_0921900	conserved protein, unknown function	26.7579	0.642642
PcyM_0720500	conserved Plasmodium protein, unknown function	14.7734	0.641188
PcyM_1336800	H/ACA ribonucleoprotein complex subunit 4, putative (CBF5)	19.9268	0.639585
PcyM_1428500	conserved Plasmodium protein, unknown function	11.0528	0.638982
PcyM_0216400	cysteine desulfurase, putative (NFS)	33.7185	0.637472
PcyM_1475400	thymidylate kinase (TMK)	15.7134	0.631728
PcyM_1205100	0	34.1256	0.631607
PcyM_1278200	conserved Plasmodium protein, unknown function	24.8773	0.624875
PcyM_0411100	conserved Plasmodium protein, unknown function	25.7534	0.624693
PcyM_0951100	ribosome assembly protein 4, putative (RSA4)	27.9146	0.624622
PcyM_1414000	mitochondrial ribosomal protein S35 precursor, putative	22.926	0.624563
PcyM_0724500	proline--tRNA ligase, putative (aPRS)	72.334	0.614902
PcyM_1245400	1-deoxy-D-xylulose 5-phosphate reductoisomerase (DXR)	14.3925	0.612066
PcyM_0518800	conserved Plasmodium protein, unknown function	11.9996	0.608927
PcyM_0836400	0	11.2229	0.603973
PcyM_0946900	conserved Plasmodium protein, unknown function	14.9396	0.599398
PcyM_1117800	methyltransferase, putative	10.5812	0.598407
PcyM_0932000	CRAL/TRIO domain-containing protein, putative	10.8101	0.59635
PcyM_1301300	XPA binding protein 1, putative	12.6562	0.595788
PcyM_1024100	asparagine--tRNA ligase, putative	12.9123	0.592681
PcyM_0217400	actin-like protein, putative (ALP3)	35.9732	0.591738
PcyM_1417400	tRNA (adenine(58)-N(1))-methyltransferase catalytic subunit TRM61, putative (GCD14)	19.1893	0.590691
PcyM_1217300	conserved Plasmodium protein, unknown function	17.0541	0.588491
PcyM_1254800	conserved Plasmodium protein, unknown function	13.2753	0.585169
PcyM_0405900	conserved Plasmodium protein, unknown function	10.5094	0.582044
PcyM_0949600	apicoplast import protein Tic20, putative (TIC20)	10.1414	0.581173
PcyM_0114800	RNA-helicase, putative	15.2778	0.579044
PcyM_1134300	conserved Plasmodium protein, unknown function	13.9331	0.577863
PcyM_0403300	pre-mRNA-processing protein 45, putative (PRP45)	16.5501	0.57722
PcyM_0727300	fumarate hydratase, putative (FH)	11.1884	0.576529
PcyM_0907600	conserved Plasmodium protein, unknown function	15.8055	0.570663
PcyM_0306100	conserved Plasmodium protein, unknown function	20.6587	0.569618
PcyM_0212400	cyclase-associated protein (C-CAP)	13.1728	0.569533
PcyM_1449500	leucine-rich repeat protein (LRR13)	46.4191	0.56503
PcyM_1209900	conserved Plasmodium protein, unknown function	38.1363	0.565007
PcyM_0523100	conserved Plasmodium protein, unknown function	17.5988	0.562697
PcyM_0716100	conserved Plasmodium protein, unknown function	28.7447	0.558931
PcyM_0116000	conserved Plasmodium protein, unknown function	14.439	0.557771
PcyM_0814600	initiation factor 2 subunit family, putative	31.5586	0.557367
PcyM_1426000	drug/metabolite exporter, drug/metabolite transporter	46.3123	0.556483
PcyM_1225100	SAM-dependent RNA methyltransferase, putative	32.5975	0.555319
PcyM_1238800	conserved Plasmodium protein, unknown function	120.268	0.55475
PcyM_1350700	conserved Plasmodium protein, unknown function	10.9101	0.554622
PcyM_1250800	thioredoxin-like protein (TLP1)	20.5525	0.55356
PcyM_0215300	conserved Plasmodium protein, unknown function	23.602	0.552613
PcyM_1009100	iron-sulfur assembly protein, putative	27.3032	0.551225
PcyM_1340700	conserved Plasmodium protein, unknown function	148.658	0.550467
PcyM_1149100	conserved Plasmodium protein, unknown function	14.2426	0.54762
PcyM_1231100	ribonuclease P protein subunit RPR2, putative (RPR2)	26.6933	0.546053
PcyM_0908100	exonuclease, putative	29.5947	0.544967
PcyM_1418300	choline-phosphate cytidylyltransferase (CCT)	13.3268	0.542376
PcyM_1348400	conserved Plasmodium protein, unknown function	28.9967	0.54178
PcyM_0211600	conserved Plasmodium protein, unknown function	15.9094	0.539619
PcyM_0320400	exosome complex component CSL4, putative (CSL4)	31.992	0.539382
PcyM_0119600	peptidyl-prolyl cis-trans isomerase (CYP81)	13.923	0.539322
PcyM_1438800	triose or hexose phosphate/phosphate translocator, putative	15.6911	0.538484
PcyM_0713500	conserved Plasmodium protein, unknown function	13.721	0.534715
PcyM_0218000	conserved Plasmodium protein, unknown function	25.7803	0.532742
PcyM_0411800	ubiquinol-cytochrome-c reductase complex assembly factor 1, putative	11.0197	0.530662
PcyM_1218600	conserved Plasmodium protein, unknown function	20.1951	0.530427
PcyM_0916500	rhomboid protease ROM1 (ROM1)	11.1362	0.529054
PcyM_1349600	conserved Plasmodium protein, unknown function	33.6538	0.52515
PcyM_1426100	zinc transporter, putative	13.4055	0.52272
PcyM_0408100	conserved Plasmodium protein, unknown function	40.4121	0.522563
PcyM_0305000	conserved Plasmodium protein, unknown function	18.1113	0.517273
PcyM_1436600	signal recognition particle subunit SRP19 (SRP19)	27.0288	0.516861
PcyM_0105900	origin recognition complex subunit 2, putative (ORC2)	11.8377	0.514145
PcyM_1271400	conserved Plasmodium protein, unknown function	10.1303	0.512276
PcyM_0410400	secreted protein with altered thrombospondin repeat domain, putative (SPATR)	10.7321	0.51099
PcyM_0804300	conserved Plasmodium protein, unknown function	74.1759	0.510769
PcyM_1255200	conserved Plasmodium protein, unknown function	21.9739	0.509
PcyM_1270400	protein serine/threonine kinase-1 (CLK1)	17.1122	0.507168
PcyM_1214600	conserved Plasmodium protein, unknown function	10.8382	0.504726
PcyM_0728300	#N/A	12.9737	0.504633
PcyM_0726800	CS domain protein, putative	113.5	0.504043
PcyM_1436000	conserved Plasmodium protein, unknown function	37.8999	0.500298
PcyM_0504900	conserved Plasmodium protein, unknown function	12.2033	0.500013
PcyM_0506900	ubiquitin conjugation factor E4 B, putative (UBE4B)	12.7228	0.498753
PcyM_0920900	haloacid dehalogenase-like hydrolase, putative	12.6297	0.49835
PcyM_1211700	aspartate carbamoyltransferase (ATCase)	17.645	0.497711
PcyM_0830900	conserved Plasmodium protein, unknown function	59.7405	0.497098
PcyM_0316700	queuine tRNA-ribosyltransferase, putative	37.8635	0.496031
PcyM_0110400	cg1 protein, putative	21.8735	0.495192
PcyM_0619500	calmodulin, putative	16.5972	0.49389
PcyM_1460900	conserved Plasmodium protein, unknown function	22.5921	0.493664
PcyM_1211900	lipoyl synthase (LipA)	21.9918	0.49055
PcyM_0806000	conserved Plasmodium protein, unknown function	20.5505	0.488215
PcyM_1027700	conserved Plasmodium protein, unknown function	103.094	0.488035
PcyM_0820100	protein kinase, putative	10.0081	0.487385
PcyM_0511700	mediator of RNA polymerase II transcription subunit 7, putative (MED7)	43.0751	0.485982
PcyM_0617800	0	11.9149	0.484958
PcyM_0825900	mitochondrial ribosomal protein L27 precursor, putative	10.8972	0.480964
PcyM_0940500	conserved Plasmodium protein, unknown function	15.7113	0.480496
PcyM_1225500	conserved Plasmodium membrane protein, unknown function	29.8203	0.478163
PcyM_0944700	conserved protein, unknown function	17.0615	0.477088
PcyM_0521700	50S ribosomal protein L10, putative	63.4252	0.474206
PcyM_0313700	conserved Plasmodium protein, unknown function	12.1036	0.474202
PcyM_0725800	0	13.9482	0.471728
PcyM_0925400	cupin-like protein, putative	12.1815	0.468779
PcyM_0323300	tRNAHis guanylyltransferase, putative	13.8984	0.466308
PcyM_0402700	conserved Plasmodium protein, unknown function	12.6331	0.461818
PcyM_0915600	0	21.3973	0.461145
PcyM_1205400	conserved Plasmodium protein, unknown function	38.4222	0.461104
PcyM_1220100	exoribonuclease, putative	12.5461	0.460573
PcyM_1126300	ribonuclease H2 subunit A, putative	15.4631	0.460248
PcyM_0808100	conserved Plasmodium protein, unknown function	11.0761	0.460163
PcyM_0721500	pre-mRNA-splicing factor 18, putative (PRP18)	31.0027	0.456558
PcyM_1106300	conserved Plasmodium protein, unknown function	13.9871	0.455961
PcyM_1255800	conserved Plasmodium protein, unknown function	22.5756	0.455267
PcyM_1303100	conserved Plasmodium protein, unknown function	27.5021	0.454136
PcyM_0513200	conserved Plasmodium protein, unknown function	25.4022	0.453849
PcyM_0215600	ubiquitin carboxyl-terminal hydrolase, putative	24.7514	0.451948
PcyM_1312400	mitochondrial ribosomal protein S18 precursor, putative	21.271	0.451291
PcyM_0815100	MO15-related protein kinase (MRK)	19.5251	0.450421
PcyM_1131800	conserved Plasmodium protein, unknown function	24.817	0.449863
PcyM_0810100	conserved Plasmodium protein, unknown function	10.3486	0.447346
PcyM_0508200	translation initiation factor IF-3, putative (IF3a)	11.6684	0.44686
PcyM_1124900	DNA polymerase 1, putative	14.9304	0.442932
PcyM_0719600	U4/U6 snRNA-associated-splicing factor, putative (PRP24)	36.5504	0.442362
PcyM_1241300	conserved Plasmodium protein, unknown function	14.6139	0.44195
PcyM_0711500	conserved Plasmodium protein, unknown function	18.9674	0.441071
PcyM_1027800	TATA-box binding protein, putative (TBP)	46.2407	0.438105
PcyM_0418000	adenylosuccinate lyase, putative (ASL)	48.2034	0.437917
PcyM_1125800	conserved Plasmodium protein, unknown function	11.1508	0.436286
PcyM_1005500	conserved Plasmodium membrane protein, unknown function	23.6624	0.434429
PcyM_1322300	serine/threonine protein phosphatase 2A activator, putative (PTPA)	18.754	0.431722
PcyM_0404400	conserved Plasmodium protein, unknown function	19.3977	0.431144
PcyM_0944400	conserved Plasmodium protein, unknown function	12.266	0.429053
PcyM_1248500	conserved Plasmodium protein, unknown function	48.8266	0.428619
PcyM_0618200	conserved Plasmodium protein, unknown function	17.2239	0.427202
PcyM_0626400	DNA polymerase zeta catalytic subunit, putative	35.3754	0.426937
PcyM_1411900	zinc finger protein, putative	24.614	0.426592
PcyM_1102600	mitochondrial import inner membrane translocase subunit TIM9, putative (TIM9)	14.421	0.426415
PcyM_1475500	conserved Plasmodium protein, unknown function	35.8639	0.425239
PcyM_0710000	GTP-binding protein, putative	17.2757	0.424086
PcyM_1271100	conserved Plasmodium protein, unknown function	10.0643	0.423338
PcyM_1418700	U4/U6.U5 tri-snRNP-associated protein 2, putative (USP39)	16.8149	0.421318
PcyM_0311700	protein SOF1, putative (SOF1)	20.9358	0.417212
PcyM_1228300	0	35.1667	0.416889
PcyM_1210400	dynactin subunit 2, putative	10.9182	0.41404
PcyM_1474700	0	33.1366	0.41171
PcyM_1139400	conserved Plasmodium protein, unknown function	32.6884	0.410782
PcyM_0614100	conserved Plasmodium protein, unknown function	15.1277	0.408459
PcyM_0208400	conserved Plasmodium protein, unknown function	10.8979	0.407974
PcyM_1417800	inositol polyphosphate kinase, putative (IPK2)	55.5559	0.407449
PcyM_1015300	conserved Plasmodium protein, unknown function	23.4179	0.407323
PcyM_0917000	serine/threonine protein kinase, putative (CLK3)	10.9686	0.406387
PcyM_1221100	conserved Plasmodium protein, unknown function	11.903	0.406344
PcyM_0729100	transcription initiation factor TFIID subunit 7, putative (TAF7)	49.4545	0.40511
PcyM_1128000	RNA methyltransferase, putative	23.4963	0.405036
PcyM_0707100	conserved Plasmodium protein, unknown function	12.5344	0.404063
PcyM_0935600	conserved Plasmodium protein, unknown function	10.0412	0.404018
PcyM_0943000	conserved Plasmodium protein, unknown function	13.5304	0.402965
PcyM_1312000	conserved Plasmodium protein, unknown function	20.9876	0.402018
PcyM_0827500	zinc finger protein, putative	17.6379	0.397586
PcyM_0912500	vacuolar protein sorting-associated protein 35, putative (VPS35)	59.7303	0.395771
PcyM_1276300	leucine carboxyl methyltransferase, putative	36.5025	0.393053
PcyM_0811100	conserved Plasmodium protein, unknown function	18.9266	0.392384
PcyM_1464100	vacuolar protein sorting-associated protein 16, putative (VPS16)	13.733	0.388721
PcyM_1102500	mitochondrial carrier protein, putative	14.6976	0.387794
PcyM_0728900	serine/threonine protein kinase, putative	10.4315	0.385786
PcyM_0921400	actin-related protein 2/3 complex subunit 1, putative (ARC40)	11.9234	0.384672
PcyM_0312100	0	24.1285	0.382645
PcyM_1129900	conserved Plasmodium protein, unknown function	99.075	0.378855
PcyM_1265000	NADPH--cytochrome P450 reductase, putative (CPR)	98.5267	0.378553
PcyM_1405000	sodium/hydrogen exchanger, putative	10.2768	0.376457
PcyM_1453400	serine/threonine protein kinase RIO1, putative (RIO1)	14.9537	0.375128
PcyM_1113500	conserved Plasmodium protein, unknown function	23.1864	0.373104
PcyM_0946400	conserved Plasmodium protein, unknown function	16.2052	0.369555
PcyM_1314800	conserved Plasmodium protein, unknown function	94.5201	0.367903
PcyM_1265100	conserved Plasmodium protein, unknown function	10.1128	0.367863
PcyM_1448600	conserved Plasmodium protein, unknown function	10.2305	0.366391
PcyM_0825800	conserved Plasmodium protein, unknown function	28.8843	0.365198
PcyM_0309500	0	123.135	0.364992
PcyM_0728800	0	15.6962	0.363344
PcyM_0806500	conserved membrane protein, unknown function	16.5112	0.359432
PcyM_1267700	conserved Plasmodium protein, unknown function	13.1826	0.356266
PcyM_1020300	ras-related protein Rab-1B, putative (RAB1b)	92.2358	0.356146
PcyM_0950600	ABC transporter B family member 3, putative (ABCB3)	12.1331	0.355666
PcyM_1117100	metacaspase 1 (MCA1)	74.2085	0.352918
PcyM_0404900	conserved Plasmodium protein, unknown function	21.2922	0.35184
PcyM_1118000	conserved Plasmodium protein, unknown function	16.9298	0.351755
PcyM_0932600	0	24.5226	0.348188
PcyM_1108000	polyubiquitin binding protein, putative (DOA1)	42.0378	0.347871
PcyM_1205900	conserved Plasmodium protein, unknown function	22.5305	0.347304
PcyM_0316800	calcium-dependent protein kinase 4 (CDPK4)	72.1245	0.346363
PcyM_1000900	conserved Plasmodium protein, unknown function	14.9339	0.339435
PcyM_0612700	conserved Plasmodium protein, unknown function	19.2142	0.339374
PcyM_0309300	conserved Plasmodium protein, unknown function	12.6574	0.338029
PcyM_1117200	#N/A	43.8484	0.337977
PcyM_0707400	GDP-fucose protein O-fucosyltransferase 2, putative (POFUT2)	10.0929	0.337562
PcyM_1338400	metacaspase-like protein (MCA3)	53.1799	0.336802
PcyM_1219300	0	16.7429	0.33596
PcyM_1254300	GTP-binding protein, putative	14.2892	0.334558
PcyM_1124000	conserved Plasmodium protein, unknown function	20.8112	0.333344
PcyM_1440200	pre-mRNA-processing factor 17, putative (PRP17)	15.0436	0.331583
PcyM_0505000	leucine--tRNA ligase, putative	21.048	0.330639
PcyM_1437300	conserved Plasmodium protein, unknown function	23.7226	0.329074
PcyM_1448100	#N/A	65.6083	0.328837
PcyM_1306100	high mobility group protein B3, putative (HMGB3)	17.8303	0.328755
PcyM_0819000	diacylglycerol O-acyltransferase (DGAT)	12.758	0.328564
PcyM_0108700	RAP protein, putative	46.8174	0.327608
PcyM_1133200	0	38.6019	0.326379
PcyM_1109100	conserved protein, unknown function	12.0375	0.326205
PcyM_1253400	biotin protein ligase, putative	16.2843	0.325146
PcyM_1469500	0	17.9067	0.32514
PcyM_0939400	0	182.457	0.324767
PcyM_1116700	histone-lysine N-methyltransferase, putative	13.1568	0.324541
PcyM_1022900	conserved Plasmodium protein, unknown function	21.1842	0.323116
PcyM_1349700	glycerophosphodiester phosphodiesterase, putative (GDPD)	14.4081	0.322988
PcyM_1318600	conserved Plasmodium protein, unknown function	10.6808	0.322875
PcyM_0623600	0	43.472	0.321962
PcyM_1137000	0	20.2211	0.317898
PcyM_0711700	protease, putative	17.1005	0.317815
PcyM_1008600	conserved Plasmodium protein, unknown function	11.6392	0.317525
PcyM_1235200	asparagine synthase, putative	20.3897	0.317136
PcyM_0619400	RNA methyltransferase, putative	30.9497	0.316833
PcyM_0724100	alpha-tubulin N-acetyltransferase, putative	27.4927	0.316814
PcyM_0512300	ribosomal RNA small subunit methyltransferase NEP1, putative (NEP1)	11.2334	0.315891
PcyM_0216900	conserved Plasmodium protein, unknown function	17.5607	0.314927
PcyM_0516600	0	85.0352	0.314664
PcyM_1231700	0	32.9073	0.314022
PcyM_0708500	hypothetical protein, conserved	17.6595	0.310834
PcyM_0523200	conserved Plasmodium protein, unknown function	13.5352	0.310097
PcyM_1025900	6-cysteine protein (P38)	47.2239	0.310092
PcyM_0731600	conserved Plasmodium protein, unknown function	45.6499	0.309986
PcyM_0835000	splicing factor 3B subunit 1, putative (SF3B1)	25.1348	0.309641
PcyM_0415300	conserved Plasmodium protein, unknown function	26.3245	0.309069
PcyM_1339400	0	12.0516	0.308421
PcyM_0922900	0	11.771	0.307694
PcyM_1427800	ABC transporter F family member 1, putative (ABCF1)	11.9714	0.307375
PcyM_0512700	0	20.7867	0.304803
PcyM_1226400	DEAD box helicase, putative	30.4933	0.302086
PcyM_1416600	general transcription factor IIH subunit 2 (P44)	23.8274	0.300829
PcyM_0609200	conserved Plasmodium protein, unknown function	22.2608	0.298338
PcyM_0831600	phosphatidylinositol 3- and 4-kinase, putative	85.5773	0.297021
PcyM_0828700	0	28.9034	0.296022
PcyM_1277700	metacaspase-like protein	13.9954	0.294907
PcyM_1208300	GTPase, putative	11.3419	0.294774
PcyM_0217800	zinc finger protein, putative	10.6262	0.294679
PcyM_0507200	alpha/beta hydrolase, putative	12.0179	0.292889
PcyM_1262900	DER1-like protein (Der1-1)	20.9833	0.291616
PcyM_0602900	conserved Plasmodium protein, unknown function	13.4784	0.290666
PcyM_0728200	conserved Plasmodium protein, unknown function	17.0234	0.290566
PcyM_1308200	tRNA delta(2)-isopentenylpyrophosphate transferase, putative (MiaA)	16.6652	0.289303
PcyM_1108200	bifunctional polynucleotide phosphatase/kinase (PNKP)	56.4523	0.287718
PcyM_1460700	S-adenosyl-methyltransferase, putative	100.424	0.285138
PcyM_1103300	conserved Plasmodium protein, unknown function	22.4559	0.284902
PcyM_0841900	ABC transporter B family member 4, putative (ABCB4)	14.6	0.283921
PcyM_1124800	conserved Plasmodium protein, unknown function	12.2216	0.283808
PcyM_0920300	DNA mismatch repair protein MLH, putative (MLH)	14.5753	0.282906
PcyM_1337500	lysine--tRNA ligase, putative	20.0476	0.282836
PcyM_0219100	dynein heavy chain, putative	13.1943	0.282758
PcyM_0414200	0	13.7789	0.282445
PcyM_1255500	conserved Plasmodium protein, unknown function	11.8668	0.280829
PcyM_1029300	conserved Plasmodium protein, unknown function	26.9213	0.277421
PcyM_1257300	conserved Plasmodium protein, unknown function	14.6896	0.274126
PcyM_1207100	0	133.994	0.273972
PcyM_1214900	V-type proton ATPase subunit D, putative	19.0376	0.272171
PcyM_0623100	myb2 transcription factor, putative (Myb2)	42.3719	0.270469
PcyM_0528300	conserved Plasmodium protein, unknown function	33.4603	0.269499
PcyM_1113600	patatin-like phospholipase, putative	12.95	0.268473
PcyM_1121900	0	11.9074	0.266925
PcyM_0946700	conserved Plasmodium protein, unknown function	30.3378	0.265667
PcyM_0624500	translation initiation factor IF-3, putative (IF3b)	15.5867	0.2652
PcyM_1466400	zinc finger protein, putative	31.9258	0.264394
PcyM_1219600	calcium-dependent protein kinase 5 (CDPK5)	15.0014	0.262874
PcyM_0831200	dolichyl-diphosphooligosaccharide--protein glycosyltransferase subunit 1, putative	33.7881	0.262519
PcyM_0937300	conserved Plasmodium protein, unknown function	11.0211	0.260203
PcyM_0714400	conserved Plasmodium protein, unknown function	15.9718	0.25789
PcyM_1260700	serine/threonine protein kinase KIN, putative (KIN)	30.1655	0.257508
PcyM_0509400	exonuclease, putative	30.8399	0.256797
PcyM_1204900	conserved Plasmodium protein, unknown function	18.6544	0.256314
PcyM_0118000	U2 snRNA/tRNA pseudouridine synthase, putative	20.1387	0.255732
PcyM_0620200	conserved Plasmodium protein, unknown function	21.6747	0.255423
PcyM_1126500	ATP-dependent DEAD box helicase, putative	11.4998	0.254412
PcyM_0828400	conserved Plasmodium protein, unknown function	25.88	0.254264
PcyM_1138600	0	21.0641	0.253727
PcyM_1204800	conserved Plasmodium membrane protein, unknown function	20.7283	0.253055
PcyM_1305400	0	11.033	0.251106
PcyM_1220400	endopeptidase, putative	30.7379	0.249454
PcyM_1247500	tRNA 3'-trailer sequence RNase, putative	10.5392	0.247971
PcyM_1462500	cell cycle control protein, putative	10.2235	0.245192
PcyM_0706300	0	13.0327	0.244832
PcyM_0936100	conserved Plasmodium protein, unknown function	16.9191	0.244429
PcyM_1414800	conserved Plasmodium protein, unknown function	21.0248	0.243111
PcyM_1248400	zinc finger protein, putative	20.6375	0.241977
PcyM_1417200	conserved Plasmodium protein, unknown function	15.1789	0.240311
PcyM_1219500	conserved Plasmodium protein, unknown function	14.3011	0.239687
PcyM_1434400	GPI ethanolamine phosphate transferase 3, putative (PIGO)	33.8197	0.238989
PcyM_0818100	conserved Plasmodium protein, unknown function	12.8523	0.237296
PcyM_1018300	0	23.6697	0.234318
PcyM_0416200	serine repeat antigen 2 (SERA2)	19.4627	0.234067
PcyM_1340200	0	49.6801	0.232345
PcyM_1466300	syntaxin, Qa-SNARE family (SYN16)	36.3517	0.231022
PcyM_1018100	conserved Plasmodium protein, unknown function	14.7257	0.230612
PcyM_1338200	0	16.3338	0.230247
PcyM_1248700	conserved Plasmodium protein, unknown function	23.0003	0.229888
PcyM_1248000	conserved Plasmodium protein, unknown function	11.2049	0.229585
PcyM_0420600	0	10.7088	0.227911
PcyM_1027500	hypothetical protein, conserved	17.0097	0.227761
PcyM_1475700	conserved Plasmodium protein, unknown function	54.4201	0.227295
PcyM_0709300	phosphatidylinositol N-acetylglucosaminyltransferase, putative	27.7339	0.227041
PcyM_1249400	DNA-directed RNA polymerase III subunit RPC4, putative	10.2458	0.22527
PcyM_0943500	guanylyl cyclase, putative (GCalpha)	12.4314	0.224839
PcyM_1010500	conserved Plasmodium protein, unknown function	16.7238	0.223994
PcyM_0524400	hypothetical protein	13.5139	0.223379
PcyM_0830400	erythrocyte membrane associated protein 2 (EMAP2)	14.1654	0.22293
PcyM_0403600	DEAD/DEAH helicase, putative	59.0842	0.222758
PcyM_0816600	0	17.0217	0.221809
PcyM_1227900	apicoplast calcium binding protein 1 (ACBP1)	27.2168	0.221036
PcyM_0119500	U3 small nucleolar RNA-associated protein 14, putative (UTP14)	26.0246	0.215192
PcyM_0530000	0	12.0695	0.213459
PcyM_1321900	conserved Plasmodium protein, unknown function	27.4518	0.212133
PcyM_1319900	0	10.471	0.20813
PcyM_1343400	p1/s1 nuclease, putative	24.37	0.207388
PcyM_0612800	0	57.267	0.206186
PcyM_1340800	0	29.3863	0.206183
PcyM_1456000	conserved protein, unknown function	11.6287	0.204896
PcyM_1119400	ribosome biogenesis protein YTM1, putative (YTM1)	12.3922	0.204445
PcyM_1473500	cutA, putative	23.0374	0.202981
PcyM_1408300	RED-like protein, putative	13.3639	0.202584
PcyM_1417000	conserved Plasmodium protein, unknown function	10.2686	0.202294
PcyM_1443700	0	24.0203	0.201098
PcyM_0936000	conserved Plasmodium protein, unknown function	46.0077	0.200925
PcyM_1118700	conserved Plasmodium protein, unknown function	22.6885	0.200668
PcyM_1414900	methionyl-tRNA formyltransferase, putative (MTFMT)	67.5273	0.20057
PcyM_0317700	dynein heavy chain, putative	26.0879	0.200239
PcyM_0308200	apical sushi protein, putative (ASP)	20.8075	0.198653
PcyM_0407500	0	22.1176	0.198384
PcyM_0813800	0	27.65	0.196718
PcyM_1469300	conserved Plasmodium protein, unknown function	15.5755	0.194938
PcyM_1267600	0	42.7401	0.193836
PcyM_0619100	#N/A	12.481	0.193583
PcyM_0119000	AAA family ATPase, putative	46.3433	0.193418
PcyM_1213500	conserved Plasmodium protein, unknown function	11.8337	0.19326
PcyM_1240000	conserved Plasmodium protein, unknown function	18.3897	0.190338
PcyM_0826800	conserved Plasmodium protein, unknown function	18.5147	0.189788
PcyM_0418300	0	25.0081	0.188665
PcyM_0936700	conserved Plasmodium protein, unknown function	12.4886	0.188125
PcyM_0705000	conserved Plasmodium protein, unknown function	13.0365	0.184431
PcyM_0111400	conserved Plasmodium protein, unknown function	13.4716	0.181294
PcyM_1219100	0	62.8147	0.181096
PcyM_0516100	Plasmodium exported protein (PHIST), unknown function	17.6216	0.180465
PcyM_1456800	asparagine/aspartate rich protein, putative	14.0515	0.179928
PcyM_0927400	RAP protein, putative	49.0124	0.179744
PcyM_0324900	3-demethylubiquinone-9 3-methyltransferase, putative (COQ3)	11.3237	0.179186
PcyM_1214200	0	11.3649	0.178651
PcyM_0949500	transcription initiation factor IIF subunit beta, putative (TFG2)	10.876	0.17795
PcyM_1111300	conserved Plasmodium protein, unknown function	44.9402	0.175411
PcyM_0921800	tRNA m(1)G methyltransferase, putative	10.3826	0.174759
PcyM_1319100	conserved Plasmodium protein, unknown function	47.8444	0.174101
PcyM_1252400	snRNA-activating protein complex subunit 3, putative	10.262	0.172225
PcyM_0331000	0	12.2161	0.169717
PcyM_0940900	conserved Plasmodium protein, unknown function	582.01	0.166527
PcyM_0930800	conserved Plasmodium protein, unknown function	21.5707	0.165145
PcyM_0950100	conserved Plasmodium protein, unknown function	13.0901	0.164993
PcyM_1286800	0	518.058	0.162549
PcyM_0718900	#N/A	23.5928	0.162263
PcyM_0936200	conserved Plasmodium protein, unknown function	21.2263	0.160987
PcyM_1343700	conserved protein, unknown function	12.9271	0.15982
PcyM_1452000	conserved Plasmodium protein, unknown function	38.1361	0.158829
PcyM_1341500	FeS assembly ATPase SufC (SufC)	18.5794	0.158199
PcyM_0915400	protein tyrosine phosphatase (PRL)	11.3953	0.157718
PcyM_1279800	cysteine repeat modular protein 4, putative (CRMP4)	11.1954	0.156986
PcyM_1412000	conserved Plasmodium protein, unknown function	34.7337	0.156774
PcyM_1243600	aminophospholipid transporter, putative	10.9097	0.153954
PcyM_1127000	EGF-like membrane protein, putative	27.3792	0.152434
PcyM_1333500	conserved Plasmodium protein, unknown function	12.1182	0.151913
PcyM_1446600	conserved Plasmodium protein, unknown function	27.6477	0.150724
PcyM_1236800	conserved Plasmodium protein, unknown function	59.8149	0.150247
PcyM_1252700	0	74.423	0.149874
PcyM_1138700	conserved Plasmodium protein, unknown function	58.6921	0.149501
PcyM_0804000	conserved Plasmodium protein, unknown function	30.3047	0.148934
PcyM_1349900	conserved Plasmodium protein, unknown function	41.981	0.147205
PcyM_1101900	conserved Plasmodium protein, unknown function	18.7859	0.145061
PcyM_1313800	0	69.9355	0.144233
PcyM_1345200	WD repeat-containing protein, putative	12.1979	0.14357
PcyM_1105000	conserved Plasmodium protein, unknown function	18.4149	0.141562
PcyM_1461700	periodic tryptophan protein 1, putative (PWP1)	15.2096	0.138631
PcyM_0213500	0	20.8273	0.13636
PcyM_1452700	subpellicular microtubule protein 2, putative (SPM2)	11.6593	0.136092
PcyM_1116400	0	34.5167	0.135836
PcyM_1262400	conserved Plasmodium protein, unknown function	32.0239	0.135442
PcyM_1419400	conserved Plasmodium protein, unknown function	41.2574	0.135333
PcyM_0422300	octaprenyl pyrophosphate synthase, putative (OPP)	79.548	0.131471
PcyM_1242400	0	124.049	0.130828
PcyM_1221000	conserved Plasmodium membrane protein, unknown function	36.1417	0.12881
PcyM_1428000	conserved Plasmodium protein, unknown function	36.8052	0.127655
PcyM_0506000	conserved Plasmodium protein, unknown function	23.1174	0.127127
PcyM_1269700	conserved Plasmodium protein, unknown function	42.1315	0.126761
PcyM_0079000	0	444.169	0.126364
PcyM_1278900	splicing factor 3A subunit 1, putative (SF3A1)	15.6414	0.125729
PcyM_0622900	0	11.4177	0.124141
PcyM_0519400	0	16.2075	0.121409
PcyM_1145900	ubiquitin-conjugating enzyme E2, putative	20.7681	0.120661
PcyM_1245300	50S ribosomal protein L22, apicoplast, putative (L22)	13.4233	0.118421
PcyM_1334000	0	25.9609	0.116933
PcyM_1126800	RNA-binding protein, putative	27.7883	0.116564
PcyM_0947100	coproporphyrinogen-III oxidase, putative (CPO)	15.9105	0.115775
PcyM_1345300	WD repeat-containing protein, putative	11.6361	0.115041
PcyM_1448700	conserved Plasmodium protein, unknown function	12.5706	0.114842
PcyM_0704100	conserved Plasmodium protein, unknown function	15.0028	0.112271
PcyM_0933100	conserved Plasmodium protein, unknown function	39.5628	0.110135
PcyM_0908500	dna2/nam7 helicase family member, putative	10.9257	0.109227
PcyM_0929400	0	33.7284	0.10749
PcyM_1005600	RAP protein, putative	12.5794	0.107432
PcyM_0806200	conserved Plasmodium protein, unknown function	14.8597	0.107078
PcyM_1144300	conserved Plasmodium protein, unknown function	20.1591	0.103408
PcyM_0722600	conserved protein, unknown function	17.8521	0.101459
PcyM_0531900	0	29.2012	0.0983574
PcyM_0405100	0	20.3968	0.0976125
PcyM_0521500	0	29.2344	0.0955162
PcyM_1351800	secreted ookinete adhesive protein (SOAP)	16.8182	0.094407
PcyM_0724600	protein phosphatase-beta, putative	13.5008	0.0940636
PcyM_1274600	serine/threonine protein kinase, putative	52.0556	0.0934692
PcyM_0113400	0	13.9995	0.0928714
PcyM_0514800	#N/A	78.5006	0.0916634
PcyM_1457400	conserved Plasmodium protein, unknown function	19.3209	0.0912759
PcyM_0213000	transporter, putative	24.7106	0.0896493
PcyM_0216100	0	15.7396	0.0883507
PcyM_0923100	0	29.704	0.0848956
PcyM_1243900	leucine-rich repeat protein (LRR14.1)	10.9054	0.0841834
PcyM_1002000	0	11.7825	0.0824577
PcyM_1228700	conserved Plasmodium protein, unknown function	11.1844	0.0822609
PcyM_0528400	0	13.2866	0.0798628
PcyM_0403500	small nuclear ribonucleoprotein Sm D2, putative (SNRPD2)	14.9723	0.0797182
PcyM_0808200	zinc finger C-x8-C-x5-C-x3-H type, putative	10.7015	0.0796486
PcyM_1123200	conserved Plasmodium protein, unknown function	73.8785	0.0790924
PcyM_1018000	kinase, putative	11.2091	0.0782738
PcyM_0062900	unspecified product	20.5896	0.0755438
PcyM_0805100	DnaJ protein, putative	19.3128	0.074272
PcyM_1125000	conserved Plasmodium protein, unknown function	14.1131	0.0699926
PcyM_0937400	amino acid transporter, putative	41.679	0.0648949
PcyM_0942900	conserved Plasmodium protein, unknown function	11.6414	0.0632942
PcyM_1001100	conserved Plasmodium membrane protein, unknown function	34.6744	0.0597589
PcyM_0949300	conserved Plasmodium protein, unknown function	10.8652	0.0575575
PcyM_1433600	conserved Plasmodium protein, unknown function	13.1252	0.0546006
PcyM_1126900	0	16.5541	0.0509722
PcyM_0522100	conserved Plasmodium protein, unknown function	52.127	0.045882
PcyM_1343200	conserved Plasmodium protein, unknown function	14.9764	0.045018
PcyM_1328200	0	17.7325	0.0416708
PcyM_0801900	conserved Plasmodium protein, unknown function	123.865	0.0332052
PcyM_1320100	#N/A	31.0288	0.00745766
PcyM_1100900	0	11.7836	0.00521483
PcyM_1348000	conserved Plasmodium protein, unknown function	13.2691	0.00520164
PcyM_0608300	#N/A	19.5053	0.00466178
PcyM_0321000	0	10.0696	0.00457658
PcyM_0117500	0	28.4795	0.00424338
PcyM_1208600	leucine-rich repeat protein (LRR4.1)	30.8922	0.0040174
PcyM_0803300	conserved Plasmodium protein, unknown function	10.981	0.00373514
PcyM_0206200	0	38.1984	0.00358562
PcyM_0715200	0	54.7393	0.00293773
PcyM_0839000	0	21.789	0.00126946
PcyM_0074000	0	19.2895	0.0010029
PcyM_0026500	VIR protein, pseudogene	128.339	0.000592111
PcyM_0841400	0	25.2853	0
PcyM_0062700	unspecified product	15.4522	0
PcyM_0917800	0	24.0974	0
PcyM_1230100	#N/A	15.0571	0
PcyM_1268300	inner membrane complex protein, putative (IMC20)	15.1937	0
PcyM_0803700	#N/A	10.1929	0
PcyM_0945200	myosin heavy chain subunit, putative	11.8837	0
PcyM_1101200	0	13.6137	0
PcyM_0525000	#N/A	17.8783	0
PcyM_0717700	0	14.4412	0
PcyM_0307300	#N/A	13.2445	0
PcyM_1107100	#N/A	10.6824	0
PcyM_0011400	0	26.9495	0
PcyM_1407200	conserved Plasmodium protein, unknown function	651.886	0
PcyM_0818600	0	61.1045	0
PcyM_0011000	0	492.835	0
PcyM_1476000	0	15.519	0
PcyM_0936900	0	24.0386	0
PcyM_0328300	0	10.2423	0
PcyM_1145300	glutaredoxin-like protein (GLP2)	14.3956	0
PcyM_0007000	0	12.3644	0
PcyM_0203600	0	10.0341	0
PcyM_0107800	0	18.7092	0
PcyM_0505800	0	33.2797	0
PcyM_1259900	MFS-type transporter, putative	13.8547	0
PcyM_1214100	sporozoite protein essential for cell traversal (SPECT1)	18.8462	0
PcyM_0213100	0	50.8168	0
PcyM_0915100	0	23.8577	0
PcyM_0959600	0	105.15	0
PcyM_1003700	0	22.339	0
PcyM_0915200	conserved Plasmodium protein, unknown function	10.9512	0
PcyM_0523400	0	12.0127	0
PcyM_0502400	Plasmodium exported protein, unknown function	28.7425	0
PcyM_0011200	0	34.8394	0
PcyM_0519300	#N/A	16.0129	0
PcyM_0707700	subpellicular microtubule protein 1, putative (SPM1)	30.4532	0
PcyM_0068000	0	14.6528	0
PcyM_0533500	#N/A	12.9497	0
PcyM_1101300	0	10.6047	0
PcyM_0210800	0	19.3817	0
PcyM_0029900	0	12.4964	0
PcyM_0010300	VIR protein	17.1441	0
PcyM_0025800	0	14.222	0
PcyM_0623500	0	10.6805	0
PcyM_1288000	0	15.6665	0
PcyM_0500700	0	13.6038	0
PcyM_0503500	0	49.6641	0
PcyM_0010500	0	460.241	0
PcyM_0521900	0	13.8025	0
PcyM_0708300	SET domain protein, putative	34.3402	0
PcyM_0059500	0	12.2463	0
PcyM_1285300	0	12.337	0
PcyM_1455700	conserved Plasmodium protein, unknown function	16.3057	0
			624
