# Supplementary material for: Transcriptomic analysis reveals reduced transcriptional activity in the malaria parasite Plasmodium cynomolgi during progression into dormancy
Source: eLife. 2018 Dec 27;7:e41081. doi: 10.7554/eLife.41081 (PMC6344078; doi:10.7554/eLife.41081)
Supplement: Supplementary file 4. — The table indicates if pathways are significantly up- or down-regulated over time. [file elife-41081-supp4.xlsx]

## Sheet: Sheet1
Supplementary file 4: Expression of Plasmodium pathways in schizont and hypnozoite samples at day 9 and day 10. The table indicates if pathways are significantly up- or down-regulated over time.
Function / Pathway
Invasion		SZ Day 6/7	SZ Day 9	SZ, False Discovery Rate (FDR)	Sz, Significance	HZ Day 6/7	HZ Day 9	HZ, False Discovery Rate (FDR)	HZ, Significance
Model for merozoite invasion		66.6667	100	0.863531		33.3333	0	0.957526
Genes coding for GPI-anchored membrane proteins		85.7143	100	0.547184		38.0952	9.52381	0.351157
Roles of rhoptry neck proteins during invasion		50	100	0.863531		25	0	1
Domains of merozoite surface proteins		45.4545	90.9091	0.247139		18.1818	0	0.978003
Merozoite ligands, their erythrocyte receptors		36.3636	100	0.0286232		18.1818	0	0.978003
Functional annotation of merozoite invasion-related proteins		41.791	100	1.04993e-07	*	20.8955	11.9403	0.694006
Subcellular localization of proteins involved in invasion		53.3333	73.3333	1		15.5556	6.66667	0.416866
Components of the linear motor responsible for merozoite motility in invasion		68.75	96.875	0.039893		31.25	25	1
Parasite invasion ligands and human erythrocyte receptors		0	100	0.0509921		0	0	1
MSPDBL and MSP1 mediate merozoite invasion		83.3333	100	1		0	16.6667	1
Role of perforin 1 in merozoite egress		100	100	1		100	0	0.0815873
Cytoadherence
Interactions between modified host cell membrane and endothelial cell		67.7419	22.5806	0.000795597	*	3.22581	0	1
Possible reasons for increased permeability of host cell membrane		0	100	0.356362		0	0	1
Characteristics of Plasmodium falciparum export proteins that remodel infected erythrocyte		46.1538	92.3077	0.143758		23.0769	30.7692	1
Properties of proteins exported to erythrocyte		67.5676	37.8378	0.0286232		5.40541	8.10811	1
Energy metabolism
Glyoxalase metabolism		87.5	100	1		50	25	1
Mannose and Fructose metabolism		100	100	1		40	20	1
Pyruvate metabolism		83.3333	100	0.863531		55.5556	44.4444	1
Pentose Phosphate Cycle		100	100	1		45.4545	36.3636	1
Glycolysis		88.4615	100	0.547184		50	42.3077	1
Cofactors and Other Substances
Nicotinate and nicotinamide metabolism		100	100	1		66.6667	0	0.337809
Ubiquinone metabolism		100	100	1		50	12.5	0.798296
One-carbon enzyme systems serine hydroxymethyltransferase and glycine-cleavage complex		100	100	1		50	25	1
Porphyrin metabolism		100	100	1		68.75	43.75	0.773307
Shikimate biosynthesis		75	100	1		25	0	1
Pyridoxal phosphate (Vitamin B6) metabolism		77.2727	100	0.361444		50	31.8182	0.84831
Thiamine metabolism		94.4444	100	1		55.5556	44.4444	1
Folate biosynthesis		86.6667	100	0.863531		33.3333	33.3333	1
CoA biosynthesis		100	100	1		33.3333	50	1
Lipid metabolism
Terpenoid metabolism		93.3333	100	1		86.6667	40	0.138377
Sterol transport and phosphatidylinositol 4-phosphate transfer between endoplasmic reticulum and Golgi membranes		75	100	1		50	0	0.949507
Dolichol metabolism		75	100	0.863531		62.5	25	0.808741
Isoprenoids metabolism		83.3333	100	0.863531		41.6667	25	1
Phosphatidylcholine metabolism		75	91.6667	1		50	33.3333	1
Utilization of phospholipids		83.871	96.7742	0.547184		35.4839	22.5806	0.889253
Sphingomyelin and ceramide metabolism		75	100	0.100938		25	16.6667	1
Shared themes in cascading Rab and phosphoinositide pathways		92.3077	100	1		53.8462	38.4615	1
Inositol Phosphate metabolism		84.6154	100	0.863531		38.4615	30.7692	1
Glycosylphosphatidylinositol (GPI) anchor biosynthesis		100	100	1		29.4118	29.4118	1
Phosphatidylethanolamine and phosphatidylserine metabolism		81.5789	97.3684	0.218961		28.9474	26.3158	1
Fatty acids elongation in the endoplasmic reticulum		89.4737	100	0.863531		21.0526	21.0526	1
Fatty acid synthesis in the apicoplast		94.2857	100	0.863531		51.4286	54.2857	1
Model for metabolic compartmentalization of PI biosynthesis		100	100	1		30	50	1
Nucleotide metabolism
Purine metabolism		79.3103	100	0.129428		37.931	24.1379	0.914495
Pyrimidine metabolism		82.6087	100	0.547184		56.5217	30.4348	0.48998
Chaperones and protein structure modifications
Genes coding for chaperones and their regulators		88.5714	100	0.00738542	*	41.9048	47.619	1
Chaperone network and protein quality control of the mitochondrion		91.1765	100	0.547184		38.2353	44.1176	1
Chaperone-assisted protein folding		86.4865	100	0.0246262		45.9459	60.8108	0.798296
Organization of chaperone pathways in the cytosol		93.1034	100	0.863531		44.8276	68.9655	0.765783
Localization and function of some Hsp40s and Hsp70s		100	100	1		31.25	62.5	0.918598
The HSP70 chaperone cycle		100	100	1		42.8571	100	0.568682
Mitosis and Chromosome Separation
Proteins involved in steps during passage through prophase		80	100	0.547184		40	0	0.135393
Regulation of spindle microtubule dynamics		87.8049	100	0.221664		60.9756	24.3902	0.015
Putative organization of the kinetochore		88.2353	100	0.361444		50	20.5882	0.235964
Kinetochores power chromosome movements in mitosis		82.3529	100	0.129428		44.1176	23.5294	0.437717
Effect of different motors on spindle length		82.3529	100	0.547184		58.8235	52.9412	1
Structure of the mitotic centrosome		92.3077	100	0.863531		53.8462	42.3077	1
Centriole proteins		88.8889	100	0.863531		50	61.1111	1
Anaphase promoting complex ubiquitin-ligase		77.7778	100	0.863531		33.3333	33.3333	1
Control of the mitotic spindle organization by kinesins		63.6364	100	0.547184		9.09091	36.3636	0.808741
Chromatin Structure
Heterochromatin structure of the telomeric and subtelomeric regions		100	100	1		100	50	0.949507
Histone lysine methylation		87.5	100	1		50	0	0.376557
Chromatin modifying proteins		94.4444	100	1		50	5.55556	0.077424
Telomerase and some telomerase associated proteins		83.3333	100	1		83.3333	50	1
Plasmodium falciparum chromatin landscape		90	100	1		60	30	0.835479
Proteins containing histone post translational modification-binding modules		86.6667	100	0.863531		46.6667	26.6667	0.955857
Histone acetylation		95.2381	100	1		66.6667	57.1429	1
Acetylation recognition by the bromodomain and other modules		72.7273	100	0.547184		54.5455	45.4545	1
Centrosome proteins		80.5556	100	0.000817738	*	44.4444	41.6667	1
ATP-dependent chromatin remodeling complexes		88.4615	100	0.547184		38.4615	34.6154	1
Structure and organization of centromeric chromatin		77.7778	100	0.863531		44.4444	44.4444	1
Plasmodium falciparum histone acetylation and methylation		100	100	1		100	100	1
Nucleosome assembly and regulation		83.3333	100	0.218961		38.8889	50	1
Histone chaperones		80.9524	100	0.547184		33.3333	52.381	0.831421
Chaperone-mediated modulation of nucleosome-histone interactions		91.6667	100	1		50	83.3333	0.619834
Replication
Replication in prokaryotes a model for apicoplast and mitochondion DNA replication		92.3077	100	1		46.1538	7.69231	0.368082
A model for UbpX function in the regulation of PCNA deubiquitylation		100	100	1		60	20	0.48998
Base excision repair of AP sites		96.875	100	1		50	15.625	0.0911546
DNA Replication		88.8889	100	0.361444		52.7778	22.2222	0.072631
Genes coding for enzymes/proteins involved in DNA replication		86.5385	100	0.0744144		42.3077	11.5385	0.0125308
Genes involved in excision-repair		88	100	0.0431617		49.3333	20	0.00634275	*
DNA mismatch repair system		80.7692	100	0.361444		38.4615	19.2308	0.657624
A model for global single-strand break (SSB) repair		100	100	1		44	28	0.859813
Nucleotide excision repair		89.6552	100	0.547184		51.7241	34.4828	0.798296
Double strand break repair and homologous recombination		33.3333	100	0.239627		16.6667	0	1
Pre-replicative complex formation and transition to replication		82.3529	100	0.547184		52.9412	35.2941	1
Model for translesion DNA synthesis		75	100	0.547184		33.3333	25	1
Transcription
Various features of C/D and H/ACA snoRNAs		100	100	1		66.6667	0	0.568682
Transcription in prokaryotes		100	100	1		75	25	0.979048
Structure and processing of pre rRNA		95.6522	100	1		60.8696	13.0435	0.0257377
Schematic depiction of pseudouridylation		72.7273	100	0.547184		54.5455	9.09091	0.339816
Modification of the wobble position uridine (U34) in Lys, Glu, Gln, Leu and Arg tRNAs		80	100	1		60	20	1
tRNA modifications		85	100	0.129844		50	12.5	0.0113034
mRNA degradation		92.5926	100	0.863531		66.6667	29.6296	0.123836
Quality control in mRNA biogenesis		90.9091	100	0.863531		54.5455	22.7273	0.337809
Splicing of pre-mRNA		88.8889	100	0.00738542	*	49.4949	16.1616	0.000378575	*
RNA polymerase III transcribes tRNA and 5S rRNA		100	100	1		53.8462	23.0769	0.692048
U6 snRNP role in pre-mRNA splicing		93.1034	100	0.863531		65.5172	37.931	0.317613
CCR4 – NOT complex		90.9091	100	1		36.3636	9.09091	0.808741
RNA polymerase II transcribes mRNA		86.6667	100	0.361444		60	33.3333	0.355718
RNA polymerase I transcribes rRNA		100	100	1		62.5	37.5	1
The structures of RNA polymerases		85.7143	100	0.547184		57.1429	33.3333	0.62773
Compartmentalization of transcription site in the nucleus		100	100	1		75	50	1
RNA Degradation Factors		83.871	100	0.218961		54.8387	32.2581	0.492576
tRNA thiolation		100	100	1		60	40	1
Assisted assembly of Sm-class snRNPs		90.9091	100	1		45.4545	27.2727	1
Transcription related proteins encoding genes		88.1818	100	0.00215374	*	53.6364	36.3636	0.124391
Maturation of snRNAs requires nuclear and cytoplasmic regulatory steps		92.3077	100	1		61.5385	53.8462	1
Transcription and processing of snRNAs		82.3529	100	0.547184		47.0588	35.2941	1
Lsm proteins and RNA processing		77.7778	100	0.863531		66.6667	55.5556	1
Protein factors in pre-mRNA 3’-end processing		54.5455	100	0.161028		18.1818	9.09091	1
Encoded proteins that could be constituents of P-bodies		81.25	100	0.129428		43.75	37.5	1
Cleavage and polyadenylation of pre-mRNA		55.5556	100	0.315891		11.1111	11.1111	1
mRNA 5' capping		83.3333	100	1		33.3333	33.3333	1
Translation
Quality control mechanisms during ribosome maturation		100	100	1		63.6364	9.09091	0.169447
Maturation and export of 60S and 40S ribosomal subunits		89.9083	100	0.0250308		61.4679	12.844	2.41409e-08	*
Pre-ribosomal particles along the 40S assembly pathway		95	100	1		55	5	0.219286
Genes coding for components involved in ribosome assembly		88.3333	100	0.00110459	*	50.8333	10	9.48949e-10	*
Pre-ribosomal particles along the 60S assembly pathway		92.3077	100	0.863531		46.1538	15.3846	0.482279
Translation in prokaryotes – a template for apicoplast and mitochondrion		95.1613	93.5484	1		54.8387	32.2581	0.138377
Protein biosynthesis		89.4737	100	0.131263		54.386	36.8421	0.395449
Single Gene/enzyme deletions predicted to cause impairment of metabolic network		88.8889	100	0.000162858	*	45.098	29.4118	0.072631
Ribosomal structure		95.4545	96.7532	1		62.3377	62.3377	1
Initiation of translation		81.4815	100	0.218961		37.037	44.4444	1
Apicoplast functions
Nuclear genes with apicoplast signal sequences		87.3786	100	2.9485e-07	*	51.4563	23.7864	1.15195e-06	*
Apicoplast Kae1api-protein interactions		100	100	1		25	0	1
Genes of the apicoplast genome		82.1429	60.7143	0.427077		32.1429	10.7143	0.447866
Biosynthesis of Fe-S proteins in the apicoplast		94.4444	100	1		61.1111	33.3333	0.978003
Mitochondrial functions
Maturation of cytosolic and nuclear Fe-S proteins		90.9091	100	1		81.8182	18.1818	0.0881924
Genes coding for Fe-S containing proteins		80	100	0.547184		53.3333	6.66667	0.124391
Mitochondrial division		33.3333	100	0.863531		33.3333	16.6667	1
Mechanism of Fe–S-protein biogenesis		90.625	100	0.547184		59.375	34.375	0.619834
Nuclear genes with mitochondrial signal sequences		92.4603	100	5.2866e-05	*	55.5556	38.0952	0.00634275	*
Mitochondrial respiration
Biogenesis of cytochrome oxidase		100	100	1		47.3684	57.8947	1
Acetyl-CoA production in the mitochondrion		83.3333	100	1		50	83.3333	1
Mitochondrial electron flow		95.8333	100	1		70.8333	54.1667	0.883958
Mitochondrial TCA cycle		96.1538	100	1		57.6923	46.1538	1
Topogenesis of the Rieske FeS protein		90	100	1		80	70	1
Mitochondrial disulfide relay system		100	100	1		50	50	1
The acidocalcisome		96.875	100	1		50	37.5	0.955857
Nuclear proteome		87.4408	100	1.98104e-15	*	50.9479	47.3934	0.808741
Protein Export
Molecular model of vesicle exocytosis		83.3333	100	0.547184		61.1111	16.6667	0.126511
Genes coding for protein traffic related proteins		77.0492	100	0.00299196	*	40.9836	29.5082	0.568682
Exported parasite proteins associated with Maurer’s clefts		50	83.3333	0.947174		33.3333	33.3333	1
Proteins of detergent-resistant membranes		69.8113	99.0566	1.51006e-07	*	41.5094	49.0566	0.978003
Established and putative Maurer’s clefts proteins		59.7015	92.5373	0.000805258	*	34.3284	46.2687	0.773307
Subcellular location of exported proteins		56.25	93.75	0.167957		12.5	25	1
Translocon of exported proteins (PTEX)		75	100	1		0	25	1
Proteins of erythrocyte-derived microvesicles		55.5556	100	0.0476455		22.2222	50	0.568502
Intracellular traffic
Structure of the nuclear pore		100	100	1		75	25	0.979048
Phosphoinositides and membrane traffic		75	100	0.356362		56.25	12.5	0.169447
Karyopherin/exportin-mediated nuclear export pathways		85.7143	100	0.863531		50	7.14286	0.219286
Pathways of peptide export from the mitochondrion		100	100	1		60	20	1
Endosome maturation		100	100	1		75	37.5	0.808741
ER-to Golgi, translocation and quality control		94.7368	100	1		68.4211	31.5789	0.293274
Genes coding for transport proteins		89.8148	100	0.00738542	*	51.8519	20.3704	0.000116507	*
Rab proteins		100	100	1		72.7273	45.4545	0.904165
Transporters of the plasma membrane		91.3793	100	0.229066		50	24.1379	0.072631
Putative Golgi disassembly and reassembly mechanisms		61.5385	92.3077	0.490284		46.1538	23.0769	0.934716
Rab and other proteins involved in intracellular traffic		100	100	1		53.8462	30.7692	0.949507
Import and export through the nuclear pore		94.4444	100	1		50	27.7778	0.808741
Transporters of the mitochondrial and apicoplast membranes		96.2963	100	1		55.5556	33.3333	0.568682
Classical COPI-mediated vesicular transport		75	100	0.0640048		42.8571	21.4286	0.556679
Classical clathrin-mediated vesicular transport		63.1579	100	0.00430904	*	26.3158	10.5263	0.51959
ADP ribosylation factors functions in the secretory pathway		61.5385	100	0.344519		46.1538	30.7692	1
Rab cycle		87.234	100	0.129844		48.9362	36.1702	0.80105
Rab GTPase regulation of membrane identity		100	100	1		54.5455	54.5455	1
Subcellular location of adaptor proteins		88	100	0.547184		32	24	1
Classical COPII-mediated vesicular transport		66.6667	100	0.0286232		29.1667	20.8333	1
Large Tethering Complexes that Act in the Secretory and Endocytic Pathways		89.6552	100	0.547184		51.7241	44.8276	1
Import of proteins into the mitochondrion		90	100	0.547184		46.6667	46.6667	1
Bulk mRNA transport through the nuclear pore		100	100	1		50	50	1
Transporters of the ER/Golgi and digestive vacuole membranes		92.3077	100	0.863531		38.4615	38.4615	1
Signal recognition particle-mediated targeting of membrane and secretory proteins		100	100	1		54.5455	54.5455	1
ATP synthase complex		95	100	1		65	70	1
Proteins of the parasitophorous vacuolar membrane		66.6667	100	0.547184		33.3333	44.4444	1
Proteome of the parasitophorous vacuole		68.2927	97.561	0.0142267		41.4634	58.5366	0.583133
SRP independent translocation of GPI anchored proteins		100	100	1		22.2222	44.4444	1
Proteins with ER retention sequences		84.6154	100	0.863531		38.4615	61.5385	0.952773
Posttranslational translocation in eukaryotes		93.5484	100	0.863531		41.9355	74.1935	0.532091
Amino acid Metabolism
Lysine metabolism		75	100	1		75	0	0.532091
Aminosugars metabolism		100	100	1		62.5	12.5	0.48998
Asparagine and Aspartate metabolism		75	100	0.863531		50	0	0.376557
Glutamate metabolism		83.3333	100	0.863531		58.3333	16.6667	0.416866
Nitrogen metabolism		88.8889	100	1		66.6667	33.3333	0.84831
Glycine and Serine metabolism		100	100	1		66.6667	44.4444	1
Arginine and proline metabolism		100	100	1		42.8571	28.5714	1
Phenylalanine and Tyrosine metabolism		87.5	100	1		37.5	25	1
Methionine and Polyamine metabolism		100	100	1		63.1579	52.6316	1
Leucine, Isoleucine and Valine metabolism		84.6154	100	0.863531		46.1538	46.1538	1
Selenocysteine biosynthesis		100	100	1		44.4444	55.5556	1
Post-translational protein modifications
Protein N-terminal acetylation		87.5	100	1		75	37.5	0.798296
Putative SUMO substrates		73.3333	100	0.356362		53.3333	13.3333	0.293274
Cotranslational cleavage of N-terminal methionine residues and N-terminal acetylation		88.8889	100	1		66.6667	22.2222	0.808741
Post-translational modification –SUMOylation		100	100	1		50	16.6667	1
Protein phosphorylation		87.037	100	0.0744144		44.4444	11.1111	0.00769339	*
Modification of proteins by adenylylation and ADP-ribosylation		86.7925	100	0.0744144		39.6226	11.3208	0.0177436
N-myristoylation, S-palmitoylation and prenylation of proteins		87.5	100	0.547184		33.3333	12.5	0.532091
Protein kinase coding genes		76.4706	100	0.00282877	*	45.098	19.6078	0.0630333
Calcium – calmodulin activation of protein kinases		89.4737	100	0.863531		47.3684	26.3158	0.568682
Phosphatases of Plasmodium falciparum and their timed expression		84.7826	100	0.129844		43.4783	21.7391	0.264817
Post-translational modification of elongation factor 2		80	100	1		40	20	1
The ATG autophagic pathway		83.3333	100	1		41.6667	25	1
The phosphoproteome of Plasmodium falciparum infected RBCs		86.1925	99.5816	4.16771e-08	*	42.6778	27.1967	0.0119279
Phosphoproteome - Treeck et al 2011		83.1884	99.5652	2.61376e-29	*	45.5072	31.8841	6.47574e-06	*
Phosphoproteome - Lasonder et al 2011		81.2987	99.7403	2.66231e-20	*	41.2987	28.8312	0.00769339	*
Phosphoproteome -Collins et al 2014		85.4086	99.8054	9.60281e-21	*	45.9144	33.6576	0.0022995	*
Phosphoproteome - Pease et al 2013		81.5126	99.7899	4.85135e-24	*	42.437	31.0924	0.00473501	*
Peptidases and proteases		74.6154	100	6.3189e-05	*	43.0769	36.9231	0.568682
Crosstalk between ubiquitination and SUMOylation		100	100	1		33.3333	25	1
Protein arginine methylation		85.7143	100	0.863531		50	42.8571	1
Possible paths for apoptosis		76.4706	100	0.356464		41.1765	35.2941	1
Myristoylated proteins		78.9474	100	0.03703		44.7368	39.4737	1
Total palmitome of Plasmodium falciparum		81.1502	99.6805	2.31718e-13	*	44.4089	45.6869	1
S-Glutathionylated proteins		82.4675	99.6753	1.91646e-12	*	46.7532	54.2208	0.48998
S-nitrosylated proteins		88.0851	99.5745	2.18522e-06	*	48.5106	63.4043	0.0491164
The Atg8 and Atg12 ubiquitin-like conjugation systems		100	100	1		60	80	1
Redox Metabolism
Redox Metabolism		92.5926	100	0.863531		62.963	40.7407	0.569311
Oxidative protein folding in the endoplasmic reticulum		100	100	1		62.5	37.5	1
Thioredoxin, Glutaredoxin and Peroxiredoxin		95	100	1		65	45	0.841783
Proteins targeted by the thioredoxin superfamily enzymes		86.3636	100	0.129844		59.0909	52.2727	1
Compartmentation of redox metabolism		84.6154	100	0.547184		57.6923	57.6923	1
Lipoic acid metabolism		75	100	0.863531		50	50	1
Mitochondrial antioxidant system		92.8571	100	1		71.4286	78.5714	1
Protein degradation- Ubiquitin-dependent processes
Mechanism of ubiquitin transfer		60	100	0.327627		30	10	1
The ubiquitylation machineries of the ER for misfolded secretory proteins		85.7143	100	0.361444		46.4286	28.5714	0.778126
Proteasome-mediated degradation of non-native ER proteins		91.3043	100	0.361444		50	52.1739	1
Proteasome-mediated proteolysis of ubiquinated proteins		87.9518	97.5904	0.154907		53.012	55.4217	1
Genes coding for components of the proteasome degradation machinery & their timed transcription		89.2857	100	0.0250308		51.1905	51.1905	1
Model of the Ube2w/CHIP/Ataxin-3 Ubiquitination Cycle		81.25	100	0.547184		43.75	43.75	1
SCF (Skp1-Cullin-F-box) ubiquitin-ligase		93.75	100	1		25	50	0.955857
Models for ubiquitin (Ub) chain amputation and trimming in regulating proteasomal degradation		85.7143	100	0.863531		28.5714	50	0.955857
Motility
Tubulin and microtubules		100	100	1		68.1818	40.9091	0.23539
Molecular motor prototypes		71.875	100	0.0182427		37.5	9.375	0.216355
Actin and filaments		84.6154	100	0.361444		46.1538	26.9231	0.492576
Control of microtubule assembly		47.3684	100	0.0194868		26.3158	31.5789	1
Drug resistance
Molecular markers of resistance to antimalarial drugs		85.7143	100	1		42.8571	42.8571	1
Hemoglobin digestion in the food vacuole
Hemoglobin digestion		69.5652	100	0.208808		30.4348	56.5217	1
Signaling machinery
Signaling machinery in malaria parasites		75	100	0.547184		25	16.6667	1
Polyphosphates
Generation of polyphosphates		80	100	0.344519		15	15	1
Catabolism of polyphosphates		80	100	1		40	60	1
