# Supplementary material for: Transcriptomic analysis reveals reduced transcriptional activity in the malaria parasite Plasmodium cynomolgi during progression into dormancy
Source: eLife. 2018 Dec 27;7:e41081. doi: 10.7554/eLife.41081 (PMC6344078; doi:10.7554/eLife.41081)
Supplement: Supplementary file 5. [file elife-41081-supp5.xlsx]

## Sheet: Plasmodium-bowtie2-eqp-gene-DES
Supplementary file 5: Gene expression values (FPKM after normalisation) generated by RNA-seq of hypnozoite (Hz) and liver schizont (Sz) samples, related to Figure 1.
	HZ Day 6/7 Sample 1	HZ Day 6/7 Sample 2	HZ Day 6/7 Sample 3	HZ Day 6/7 Sample 4	HZ Day 9 Sample 1	HZ Day 9 Sample 2				SZ Day 9 Sample 1	SZ Day 9 Sample 2	SZ Day 10 Sample 1	SZ Day 10 Sample 2	SZ Day 10 Sample 3	SZ Day 10 Sample 4
Gene Id	PAC-22-F1-day6/7-GFPlow	PAC-22-F2-day6/7-GFPlow	PAC-20-F1-day6/7-GFPlow	PAC-20-F2-day6/7-GFPlow	PAC-27-F1-day9-GFPlow	PAC-27-F2-day9-GFPlow	Avg. HZ day6/7	Avg. HZ Day9		PAC-27-F1-day9-GFPhigh	PAC-27-F2-day9-GFPhigh	PAC-27-F1-day10-GFPhigh	PAC-27-F2-day10-GFPhigh	PAC-30-F2-day10-GFPhigh	PAC-31-F1+F2-day10-GFPhigh	Avg. SZ day9	Avg. SZ Day10
PcyM_0000100	0.376042	1.03482	1.54501	3.05719	0	0	1.50327	0		0	0	0.0811663	0.0808754	0.240682	0.646149	0	0.262218
PcyM_0000200	0.13067	0.0349314	0.142869	0.45986	0	0	0.192083	0		0	0	0.0432854	0	0.119186	0	0	0.0406178
PcyM_0000300	0.0165823	0.0764274	0.0256729	0.040588	0	0.0034664	0.0398176	0.0017332		0.0217482	0.0689148	0.0207273	0.132909	0.0790231	0.229164	0.0453315	0.115456
PcyM_0000400	0	0.0716965	0.036895	0.0490544	0	0	0.0394115	0		0.052519	0	0	0	0.0198781	0	0.0262595	0.00496953
PcyM_0000500	0.112051	0.15079	0.133542	0.282111	0.00871958	0	0.169624	0.00435979		10.4612	4.68475	7.59125	6.13225	9.47755	4.69911	7.57295	6.97504
PcyM_0000600	0.0858645	0.867958	0.147836	0.473445	0	0	0.393776	0		0	0	0	0.14973	0	0	0	0.0374326
PcyM_0000700	0.158372	0.37537	0.0682706	0.203676	0	0	0.201422	0		0	0	0	0.00431433	0.0128392	0	0	0.00428839
PcyM_0000800	1.5436	1.93687	0.882207	2.53188	0	0	1.72364	0		0	0	0	0	0	0	0	0
PcyM_0000900	1.07906	1.24791	1.17058	2.18049	0	0	1.41951	0		0.142702	0	0	0.464626	0	0	0.0713511	0.116156
PcyM_0001000	0.960904	1.09407	0.832736	1.94032	0	0.0130106	1.20701	0.0065053		0	0	0	0	0.0516703	0.064218	0	0.0289721
PcyM_0001100	0.154943	0.0952499	0.079267	0.256811	0	0.0340487	0.146568	0.0170243		4.41896	2.9049	5.12351	3.55558	4.06362	14.3109	3.66193	6.7634
PcyM_0001200	0.0980811	0.55083	0.192589	0.207351	0	0.0237417	0.262213	0.0118708		0.0719586	0.414161	0.412511	0.0958461	0.0831932	1.7725	0.24306	0.591013
PcyM_0001300	0.00932904	0.0809115	0.0253307	0.109512	0	0	0.0562707	0		0	0	0.151841	0.252161	0	0.373061	0	0.194265
PcyM_0001400	0.0131685	0.757279	0.0426555	0.135676	0.00165781	0	0.237195	0.000828903		0.228926	0.215464	0.654537	0.46585	0	2.92912	0.222195	1.01238
PcyM_0001500	0.136927	0.222857	0.120214	0.385736	0	0	0.216434	0		0.163751	0.12342	0.114659	0.173753	0.25854	0.0528205	0.143586	0.149943
PcyM_0001600	0.236626	0.135554	0.290676	0.240013	0	0	0.225717	0		0.00929887	0	0	0	0	0	0.00464943	0
PcyM_0001700	1.82797	1.94586	0.32276	1.98635	0	0	1.52074	0		0	0.153987	0.0131612	0.393421	0	0	0.0769935	0.101646
PcyM_0001800	0.337545	0.346845	0.0997501	0.751668	0.00342794	0	0.383952	0.00171397		0.104941	0.0554983	0.0644487	0.159474	0	0	0.0802198	0.0559807
PcyM_0001900	0.397197	0.825736	0.346129	0.681927	0	0	0.562747	0		0	0	0	0.233387	0	0	0	0.0583468
PcyM_0002000	0.247744	0.672098	0.206222	0.583415	0	0	0.42737	0		0	0.0136546	0	0.0363649	0	0	0.00682731	0.00909122
PcyM_0002100	0.361444	0.769617	0.161276	0.683298	0	0.0128631	0.493909	0.00643156		0	0	0	0	0	0	0	0
PcyM_0002200	0.694348	0.264282	0.49718	2.71996	0	0	1.04394	0		0	0	0	0	0	0	0	0
PcyM_0002300	0.543819	0.193677	0.177964	0.421215	0	0	0.334169	0		0	0.0189894	0	0	0	0	0.00949471	0
PcyM_0002400	0.0222689	0.0507954	0.0422097	0.0247067	0	0	0.0349951	0		3.03291	2.97505	4.86422	2.80386	1.32748	13.1988	3.00398	5.54859
PcyM_0002500	0.0593726	0.100335	0.077198	0.341095	0	0	0.1445	0		0.280231	0	0.755443	0.136861	0	1.0124	0.140116	0.476176
PcyM_0002600	1.99586	5.10487	0.948191	0.596494	0	0	2.16136	0		0	0	0	0.334871	0	0	0	0.0837178
PcyM_0002700	0.0777308	0.412969	0.219878	0.156589	0	0	0.216792	0		0.265212	0	0	0.64763	0	0	0.132606	0.161907
PcyM_0002800	1.00992	0.359254	0.214822	0.308027	0.0304	0	0.473006	0.0152		0	0	0	0.0118119	0	0	0	0.00295297
PcyM_0002900	0.938704	2.59303	0.209339	0.683468	0	0	1.10614	0		0	0.140323	0.48886	0.162369	0	0	0.0701614	0.162807
PcyM_0003000	1.5038	0.161079	0.134388	0.782207	0.00537626	0.000961584	0.645369	0.00316892		1.15485	0.270796	0.327571	0.15876	0	0	0.712825	0.121583
PcyM_0003100	0.151003	0.782205	0.323455	0.318618	0	0	0.39382	0		0.136516	0	0	0	0.0637759	2.21937	0.0682578	0.570787
PcyM_0003200	3.19284	2.88159	1.93705	3.28078	0	0	2.82306	0		0	0	0	0	5.69089	0	0	1.42272
PcyM_0003300	0.294061	0.909648	1.66931	0.447926	0	0.00238076	0.830236	0.00119038		0	0	0	0.0451727	0	0.0232053	0	0.0170945
PcyM_0003400	0.233339	0.401266	0.138931	0.876352	0	0	0.412472	0		0.195541	0.0606614	0.115011	0.481595	0	0.00772664	0.128101	0.151083
PcyM_0003500	0.0739199	0.0595776	0.0169132	0.106984	0	0.00235492	0.0643487	0.00117746		0.358005	0.419735	0.243714	0.194272	0.00218994	1.08416	0.38887	0.381085
PcyM_0003600	0.179622	0.56348	0.317096	0.294107	0	0	0.338576	0		0.055994	0	0.0131947	0	0.0211934	0	0.027997	0.00859703
PcyM_0003700	0.0542386	0.0782169	0.0123007	0.0273795	0	0	0.0430339	0		0.042681	0.167968	0.454563	0.418697	0.21623	1.44558	0.105325	0.633768
PcyM_0003800	1.63926	12.3101	0.28885	0.624043	0	0	3.71555	0		0	0.00690282	0	0	0	0	0.00345141	0
PcyM_0003900	0.0809711	2.16106	0.103495	0.460354	0	0	0.701471	0		0	0	0	0	1.27942	0	0	0.319854
PcyM_0004000	0.104074	0.0403938	0.133266	0.194454	0	0	0.118047	0		0.138503	0	0	0	0.00867681	0	0.0692513	0.0021692
PcyM_0004100	0.137436	0.20971	0.0904185	0.297853	0	0	0.183854	0		0.0851557	0.0854234	0.00421274	0.00419764	0.014471	0	0.0852896	0.00572035
PcyM_0004200	0.145763	0.203768	0.251782	0.477326	0	0	0.26966	0		0.0119584	0	0.00603374	0	0	2.83517	0.00597922	0.710302
PcyM_0004300	0.185719	0.229391	0.0761322	0.268558	0	0	0.18995	0		0	0	0	0.00812704	0.0241857	0	0	0.00807819
PcyM_0004400	0.839302	1.32614	6.45914	4.98483	0	0	3.40235	0		0	0	0.0175351	0	0	0	0	0.00438378
PcyM_0004500	0.146905	0.206457	0.233632	0.570298	0	0	0.289323	0		0	0.351638	0.00160136	0	0	0	0.175819	0.000400341
PcyM_0004600	0.985268	0.149644	0.31814	1.26829	0.0338426	0	0.680336	0.0169213		0	0	0	0	0	16.4145	0	4.10361
PcyM_0004700	0.00892427	0.0251104	0.00993818	0.0445629	0.00393246	0.0357201	0.0221339	0.0198263		1.73368	2.80133	5.35777	3.95768	5.41514	6.78466	2.2675	5.37881
PcyM_0004800	0.179882	0.0443302	1.885	2.04024	0	0	1.03736	0		0.314533	0.778669	0.226162	0.313975	0.800894	0.0334099	0.546601	0.34361
PcyM_0004900	0.0600819	0.0967602	0.0264946	0.123634	0	0.00101533	0.0767426	0.000507663		0.498678	0.703034	0.799628	0.586986	0.902556	0.327494	0.600856	0.654166
PcyM_0005000	0.0415355	0.0292583	9.13979	0.0714521	0	0	2.32051	0		0.26353	0.449582	0.181165	0.474774	0	1.42112	0.356556	0.519265
PcyM_0005100	0.0972037	0.222145	0.0917156	0.136186	0	0	0.136813	0		0	0	0.653419	0.434051	0.00615104	0.0111486	0	0.276192
PcyM_0005200	0.298289	0.562236	0.145712	0.285049	0	0.00220851	0.322822	0.00110426		0	0.00393639	0	0	0	0.00842336	0.00196819	0.00210584
PcyM_0005300	0.215164	0.11111	0.410681	0.426301	0.0219427	0	0.290814	0.0109713		0.018704	0	0	0	0	0	0.00935202	0
PcyM_0005400	0.657034	0.385026	0.779225	1.37098	0	0.00386653	0.798067	0.00193327		0	0	1.77667	0	0	3.27386	0	1.26263
PcyM_0005500	0.15548	0.312747	0.727414	1.00386	0	0	0.549874	0		0.109543	0.231177	0.0103254	0	0	0	0.17036	0.00258134
PcyM_0005600	0.887178	1.17987	0.631387	0.919976	0	0	0.904602	0		0	0.227381	0	0.263105	0	2.43283	0.113691	0.673984
PcyM_0005700	0.0711375	0.146611	0.0946881	0.733533	0	0	0.261492	0		0.531098	0.819055	0.183555	0.847975	0.89066	1.93716	0.675076	0.964838
PcyM_0005800	1.42566	1.32827	0.564049	1.26015	0	0	1.14453	0		3.45144	5.0582	5.89531	10.6132	13.9344	22.553	4.25482	13.249
PcyM_0005900	0.595666	1.20956	0.199968	0.481381	0	0	0.621643	0		0	0.0589423	0.0586699	0.0682028	0	0	0.0294712	0.0317182
PcyM_0006000	0.125834	0.128137	0.130731	0.148527	0.0114153	0.00942634	0.133307	0.0104208		0.182933	0.123209	0.228927	0.370673	0.848544	6.45947	0.153071	1.9769
PcyM_0006100	0.0594255	0.227674	0.0704913	0.112024	0	0	0.117404	0		0	0	0.45931	0	0	0.987429	0	0.361685
PcyM_0006200	0.656892	3.07521	1.07219	1.23364	0	0.000448024	1.50948	0.000224012		0.046416	0	0.00387793	0.0779245	0.0105409	0	0.023208	0.0230858
PcyM_0006300	1.15998	0.0860251	0.438896	0.174268	0	0.000184124	0.464793	9.20622e-05		0.38317	0.336382	0.0243907	0.388852	0.201677	0.809704	0.359776	0.356156
PcyM_0006400	0.164933	0.0816127	0.180096	0.518384	0	0	0.236257	0		0.00327704	0	0.254397	0	0	0	0.00163852	0.0635993
PcyM_0006500	1.16428	1.31688	1.25243	2.60871	0	0	1.58557	0		0.930349	1.79977	3.80004	0.189321	0	11.2037	1.36506	3.79826
PcyM_0006600	0.568934	1.35938	0.339227	1.2278	0	0	0.873836	0		1.66888	0.0176097	0	0.0242576	0	0	0.843243	0.0060644
PcyM_0006700	0.707523	0.151596	0.850213	0.493327	0	0	0.550665	0		0	0	0	0	0.00983989	0	0	0.00245997
PcyM_0006800	0.678782	0.119256	0.114265	0.352095	0	0	0.316099	0		0.0400899	2.21281	0.027766	0.0276665	0.0953779	0	1.12645	0.0377026
PcyM_0006900	0.00570863	0.0162765	0.00663088	0.0265564	0.765379	0.169944	0.0137931	0.467661		21.6009	20.0411	32.9965	33.324	32.069	68.1445	20.821	41.6335
PcyM_0007000	13.6559	18.5458	3.11714	14.1388	0	0	12.3644	0		5.1075	4.74236	4.72258	1.21089	16.4996	5.33705	4.92493	6.94253
PcyM_0007100	0.261342	0.604075	0.0311261	0.123662	0	0	0.255051	0		0.68555	0.471844	1.00206	0.915141	0.0346932	2.33916	0.578697	1.07276
PcyM_0007200	0.0917719	0.0485854	0.130513	0.150185	0	0	0.105264	0		0.959972	1.2563	0.812552	1.20763	0	2.76857	1.10814	1.19719
PcyM_0007300	0.0434978	0.443301	0.0531692	0.0836531	0	0	0.155905	0		0.162159	0.541841	0.397405	0	0.204821	0	0.352	0.150557
PcyM_0007400	0.306704	0.491914	0.129198	0.330269	0	0.00879646	0.314521	0.00439823		0	0.0040108	0	0	0	0.00858258	0.0020054	0.00214565
PcyM_0007500	0.0399038	0.134692	0.119371	0.0829975	0	0	0.0942411	0		0.0681429	0	0	0.0332801	0	0	0.0340715	0.00832002
PcyM_0007600	0.410949	0.387914	0.768485	1.25101	0	0.00163199	0.704589	0.000815996		0.40799	0	0	0.249071	0	0	0.203995	0.0622678
PcyM_0007700	0.439728	1.10124	0.426254	0.740711	0	0	0.676983	0		0.717473	0.757066	0	0.876009	0	0	0.737269	0.219002
PcyM_0007800	0.335812	0.38849	0.185783	0.716883	0	0	0.406742	0		0.225464	0.312777	0.388873	0.140187	0	0.0486629	0.26912	0.144431
PcyM_0007900	0.0694621	0.156552	0.137874	0.34179	0	0	0.17642	0		0.0856907	0.00199907	0.0042392	0.00422401	0.0145619	0	0.0438449	0.00575628
PcyM_0008000	0.0797546	0.297197	0.511504	1.12284	0	0	0.502824	0		0	0	0.0363333	0	0	0	0	0.00908333
PcyM_0008100	0.649041	0.325558	0.295954	1.23309	0	0	0.625911	0		0	0	0.259885	0.00304652	0.0090663	0	0	0.0679996
PcyM_0008200	0.323538	0.125656	0.114541	0.242988	0	0	0.201681	0		0	0.0152078	0	0.020949	0	0	0.00760392	0.00523725
PcyM_0008300	0.246644	0.450112	0.162206	0.983081	0	0	0.460511	0		0.152067	0.0267431	0.00456706	0.127647	0	0.1073	0.0894048	0.0598785
PcyM_0008400	0.276447	0.0609391	0.189527	0.289951	0	0	0.204216	0		0.258447	0.00545418	0	0.0075132	0	0	0.13195	0.0018783
PcyM_0008500	0.188345	0.0439081	0.17431	0.244248	0	0	0.162703	0		0	0	0	0	0	0	0	0
PcyM_0008600	2.49178	2.98093	1.38092	4.50248	0	0	2.83903	0		0	0	0	0.0455477	0	0	0	0.0113869
PcyM_0008700	0.227872	0.156019	0.0652477	0.161819	0	0	0.152739	0		0.154808	0.001089	0.189695	0.12751	0	0	0.0779483	0.0793011
PcyM_0008800	0.00316888	0.0169794	0.0153501	0.0647872	0	0	0.0250714	0		0.119892	0.256632	0.0710339	0.418241	0.0435633	0.0464077	0.188262	0.144811
PcyM_0008900	0.0387635	0.0224637	0.00813289	0.0305651	0	0	0.0249813	0		0.178508	0	0	0	0.162154	0	0.0892542	0.0405386
PcyM_0009000	0.0673918	0.254477	0.12538	0.238096	0	0	0.171336	0		0.208942	0.00247081	0.0145096	0.00522079	0.0179983	0	0.105707	0.00943216
PcyM_0009100	0.613161	0.208227	0.410889	2.45508	0	0.010222	0.921839	0.00511098		0.0213775	0	0	0	0	0	0.0106888	0
PcyM_0009200	0	0.104484	0.153774	1.00803	0	0	0.316572	0		0	0.202222	0.00230231	0.0815433	0.00644773	0	0.101111	0.0225733
PcyM_0009300	0.439381	1.33221	0.227474	0.580169	0.00507966	0	0.644809	0.00253983		0	1.40356	0	0	0	0.0393594	0.701778	0.00983986
PcyM_0009400	0.817378	1.68948	0.445954	0.549116	0	0	0.875483	0		0.0168652	0	0	0	0	0	0.00843261	0
PcyM_0009500	0.298794	1.97321	0.162452	0.192568	0	0	0.656756	0		0	0.205645	0.0140476	0	0.0202326	0	0.102822	0.00857005
PcyM_0009600	1.45355	0.0791589	0.0981533	0.168633	0	0	0.449874	0		0	0.010645	0	0.0146637	0	0	0.00532252	0.00366592
PcyM_0009700	0.228147	0.0225282	0.0482948	0.222587	0	0.00218101	0.130389	0.00109051		0.162099	0	0.0993147	0.692711	0	3.29412	0.0810496	1.02154
PcyM_0009800	0.809193	1.04864	0.566118	0.934224	0	0	0.839545	0		0.0687625	0	0.168517	0.419783	0	0.621051	0.0343812	0.302338
PcyM_0009900	0.686655	0.484499	0.306659	0.738554	0.967083	0	0.554092	0.483541		0.329738	0	0	0	0	7.07308	0.164869	1.76827
PcyM_0010000	0.847335	2.29006	0.48968	0.295021	0	0	0.980524	0		0	0.117147	0.226734	0	0	0	0.0585737	0.0566834
PcyM_0010100	0.363434	0.0736488	0.134866	0.561387	0	0	0.283334	0		0	0	0.160571	0	0	0	0	0.0401427
PcyM_0010200	0.115823	0.0745898	0.0219956	0.0550517	0	0	0.066865	0		0.216377	0.250899	0.452097	0.926114	0.0863973	0.76475	0.233638	0.55734
PcyM_0010300	18.7606	26.0733	3.97351	19.7688	0	0	17.1441	0		0.270384	0.0798855	0.569204	0	0.0261987	0.109893	0.175135	0.176324
PcyM_0010400	0.00865582	0.0258643	0.0242582	0.0380966	0.0377284	0	0.0242187	0.0188642		2.46988	2.12431	9.7918	10.2916	18.678	30.0121	2.29709	17.1934
PcyM_0010500	202.339	1034.42	261.587	342.619	0	0	460.241	0		0	0	0.133024	0	0	0	0	0.0332561
PcyM_0010600	0.319469	0.232171	0.108223	0.218628	0	0	0.219623	0		0.312923	0	0.260544	0	0.00541437	0	0.156461	0.0664896
PcyM_0010700	0.0173301	0.0148984	0.0113899	0.0159527	0	0	0.0148928	0		0.0837949	0	0.449219	0.358087	1.15446	0	0.0418974	0.490441
PcyM_0010800	0.709879	0.885014	1.77219	2.38762	0	0	1.43867	0		0	0.022029	0	0.00400965	0	0	0.0110145	0.00100241
PcyM_0010900	0.300551	0.277018	0.187219	0.374978	0	0	0.284941	0		0.0408182	0	0.900304	0	0	0	0.0204091	0.225076
PcyM_0011000	217.483	1107.05	279.971	366.836	0	0	492.835	0		0.0305503	0	0	0	0	0	0.0152752	0
PcyM_0011100	1.92542	3.46815	1.78055	5.66402	0	0	3.20953	0		0.00310406	0	0.351198	0	0	0	0.00155203	0.0877994
PcyM_0011200	34.1956	58.2866	25.3504	21.5251	0	0	34.8394	0		0	0	0	0	0.193076	0.0799877	0	0.068266
PcyM_0011300	0.50386	0.235877	0.111686	0.505761	0	0	0.339296	0		0	0.0228677	0	0	0	0	0.0114338	0
PcyM_0011400	13.6587	60.7702	14.0519	19.3171	0	0	26.9495	0		0	0.985361	0.0220052	0	0.0242364	0	0.49268	0.0115604
PcyM_0011500	0.286784	0.717386	0.323901	0.573298	0	0	0.475342	0		0	0	0.0225853	0	0.0248753	0	0	0.0118652
PcyM_0011600	0	0.124019	0.744064	0.096976	0	0	0.241265	0		0	0	0.185704	0	0	0	0	0.0464259
PcyM_0011700	0.60245	0.0895605	0.0646924	0.0857132	0	0	0.210604	0		0	0	0	0	0	0.0127668	0	0.00319171
PcyM_0011800	0.122603	0.229633	0.502308	0.116753	0	0.0275276	0.242824	0.0137638		0	0	0	0	0	0	0	0
PcyM_0011900	1.7318	2.26417	0.999978	2.70817	0	0	1.92603	0		0.612519	0	0	0	0	0	0.30626	0
PcyM_0012000	0.250925	1.33595	0.48071	0.52043	0.273815	0.056472	0.647004	0.165144		19.878	14.5963	26.6743	37.5312	25.6118	25.0505	17.2371	28.7169
PcyM_0012100	3.23562	3.07122	0.199646	1.61734	0	0.450453	2.03095	0.225227		40.8388	36.8593	38.3114	41.8057	67.2327	43.8927	38.8491	47.8106
PcyM_0012200	0.374923	0.359275	0.425767	0.932968	0.653861	0.351957	0.523233	0.502909		47.115	36.855	37.1583	39.0159	41.8535	58.3936	41.985	44.1053
PcyM_0012300	0.271416	0.247111	0.409084	5.27974	0.505047	0.577691	1.55184	0.541369		79.9877	66.4433	68.8619	65.8791	74.25	94.6139	73.2155	75.9012
PcyM_0012400	0.135989	0.426035	0.403807	0.638021	0	0	0.400963	0		0	0	0	0.00406185	0	0	0	0.00101546
PcyM_0012500	0.12662	0.604243	0.224024	0.402149	0	0	0.339259	0		1.49852	0	8.16097	5.6922	11.1923	53.7614	0.749258	19.7017
PcyM_0012600	0.0336599	0.0141421	0.0170111	0.0836376	0	0	0.0371127	0		0	0	0.539669	0.806602	0.400069	29.3361	0	7.77061
PcyM_0012700	0.1246	0.0787144	0.0179952	0.144943	0.00235896	0.0857095	0.0915632	0.0440343		11.4012	7.2564	21.111	30.3156	54.7094	9.1532	9.32879	28.8223
PcyM_0012800	0.22904	0.360231	0.0680712	0.455088	0	0	0.278107	0		2.23821	2.05367	3.33882	5.58436	6.18786	9.00891	2.14594	6.02999
PcyM_0012900	0.0248471	0.0314391	0.0403407	0.0365761	0	0	0.0333007	0		0.135124	0.00151682	0.165575	0	0	0	0.0683205	0.0413939
PcyM_0013000	1.9534	0.64467	0.683869	0.729096	0	0	1.00276	0		0	0	0	0	0.0179393	0	0	0.00448484
PcyM_0013100	0.109191	0.2208	0.0482974	0.0622205	0	0	0.110127	0		7.00581	0.616035	15.7385	13.8287	31.8199	85.0262	3.81092	36.6033
PcyM_0013200	0.0165024	0.0178814	0.0101635	0.0384115	0	0	0.0207397	0		0.130462	0.0917744	0.21315	0.318579	0.0790065	0.687348	0.111118	0.324521
PcyM_0013300	0.135473	0.257031	0.0187967	0.0253659	0	0	0.109166	0		2.27129	2.6032	2.05566	2.65281	3.40638	0.891282	2.43724	2.25153
PcyM_0013400	0.232037	0.35824	0.100867	0.281398	0.00419298	0	0.243136	0.00209649		7.46275	4.88767	16.8701	18.0664	34.5965	151.655	6.17521	55.2971
PcyM_0013500	0.41817	1.56154	0.22704	0.467383	0	0	0.668532	0		0.405517	0	0.248451	0	0	0.68673	0.202758	0.233795
PcyM_0013600	0.66942	2.41055	0.176965	0.133925	0	0	0.847716	0		0.125091	0.263988	0.153281	0.458196	0.00946924	0.141225	0.19454	0.190543
PcyM_0013700	2.64366	4.04074	3.6034	6.88605	0	0.00151495	4.29346	0.000757475		0.133067	0	0.163055	0.162471	0	0	0.0665337	0.0813815
PcyM_0013800	7.68657	10.505	1.12461	7.42758	0	0	6.68594	0		0	0	0	0.00478273	0	0	0	0.00119568
PcyM_0013900	0.0249698	0.0178754	0.0131557	0.0248908	0	0	0.0202229	0		0.107191	0.131958	0.658422	0.436256	0.129828	0.564745	0.119574	0.447313
PcyM_0014000	0.123762	0.691657	0.240099	0.277156	0	0.000783296	0.333169	0.000391648		0.273884	0.0642217	0.118648	0.495411	0.0276435	0.0229044	0.169053	0.166152
PcyM_0014100	0.0956623	0.0476216	0.0508963	0.199295	0.157639	0.129116	0.0983687	0.143378		7.20058	5.40637	6.77389	5.93749	10.0018	7.61857	6.30348	7.58293
PcyM_0014200	1.02025	3.62179	0.775674	1.08068	0	0	1.6246	0		0.0587928	0	0.0720422	0.287136	0	0	0.0293964	0.0897945
PcyM_0014300	0.279561	0.373745	0.0903206	0.234031	0	0	0.244414	0		0.0275954	0	0	0.00832417	0.0247724	0	0.0137977	0.00827413
PcyM_0014400	0.0657119	0.381431	0.609063	1.25011	0	0	0.576579	0		0	0	0	0	0	0	0	0
PcyM_0014500	1.80861	1.17517	0.441309	0.702905	0.00434089	0	1.032	0.00217044		0	0	0.489678	0	0	0	0	0.12242
PcyM_0014600	0.760851	0.522397	1.5673	4.71528	0	0.00140496	1.89146	0.00070248		0	0	0	0	0	0	0	0
PcyM_0014700	0.0276391	0.0507643	0.0356355	0.0408629	0.00515939	0	0.0387255	0.00257969		9.94978	5.82115	6.72495	5.39258	6.80104	6.04288	7.88546	6.24036
PcyM_0014800	0	0.0778755	0.0554161	0.0523576	0	0	0.0464123	0		0	0	0	0.67401	0.0052235	0	0	0.169808
PcyM_0014900	0.0499534	0.0446578	0.0139662	0.0184373	0	0	0.0317537	0		0.0389378	0.114113	0.135761	0.509009	0.273331	0.222606	0.0765252	0.285177
PcyM_0015000	0.17965	1.0601	0.573826	1.06355	0.0118452	0	0.719283	0.00592258		0.137317	0	0.00701095	0.788001	0	0	0.0686587	0.198753
PcyM_0015100	0.442895	5.61158	0.427967	1.53271	0.00242853	0	2.00379	0.00121427		0.0066243	0	0.441572	1.85216	0.866508	0.00385997	0.00331215	0.791025
PcyM_0015200	0.1642	0.271527	0.300662	1.17023	0	0	0.476653	0		0	0	0	1.36446	0	0	0	0.341115
PcyM_0015300	0.417994	2.22987	0.517168	1.59948	0	0	1.19113	0		0.609997	0	0	0	0	0	0.304998	0
PcyM_0015400	0.169626	0.0385468	0.319219	0.679529	0.00117074	0.000818022	0.30173	0.000994381		0.0379218	0.13268	0.0440222	0.285118	0.849731	0	0.0853008	0.294718
PcyM_0015500	0.128203	0.301818	0.136599	0.208618	0	0	0.193809	0		0.0558012	0.176642	0	0.476919	0.107171	0	0.116221	0.146023
PcyM_0015600	0.468553	1.49866	0.304215	0.538388	0	0.000802259	0.702454	0.00040113		0	0.846515	0	0	0	0.00943454	0.423257	0.00235864
PcyM_0015700	0	0.0548336	0.0113413	0.0147055	0.00960904	0	0.0202201	0.00480452		0	0	0	0	0	0	0	0
PcyM_0015800	0.055712	0.241909	0.223774	0.559607	0	0	0.27025	0		0	0	0	0	0	0.033112	0	0.008278
PcyM_0015900	0.219619	0.308949	0.320527	0.524376	0	0	0.343368	0		0.0822546	0.260381	0.201583	0.102005	0.00468824	0	0.171318	0.0770691
PcyM_0016000	0.159194	0.264978	0.097912	0.277935	2.03448	0.163903	0.200005	1.09919		38.5985	35.7866	34.462	31.268	25.1493	59.4917	37.1925	37.5928
PcyM_0016100	0.0572997	0.0656469	0.0898061	0.210123	0.00288	0.0023782	0.105719	0.0026291		0.813072	0.83929	3.1246	4.3522	0.107041	4.88903	0.826181	3.11822
PcyM_0016200	0.0168398	0.0557413	0.0541079	0.0853071	0	0	0.052999	0		0.128568	0.0417423	0.145423	0.217352	0	0.803908	0.085155	0.291671
PcyM_0016300	0.696349	1.94087	0.197712	0.42786	0	0	0.815699	0		0.336505	0	0.41234	0.205431	0	1.89954	0.168253	0.629327
PcyM_0016400	0.102369	0.0631742	0.0984355	0.167962	0.00575269	0	0.107985	0.00287635		0.467806	0	0.540782	0.788614	1.50736	6.93561	0.233903	2.44309
PcyM_0016500	2.6633	5.61704	0.348667	1.07578	0	0.00527952	2.4262	0.00263976		0	0.00352878	0.540919	0.146995	0.218725	3.53393	0.00176439	1.11014
PcyM_0016600	0.585406	3.27161	1.16874	1.29917	0	0.00171421	1.58123	0.000857104		0.0443987	0	0.0148375	0	0.0403311	0	0.0221993	0.0137922
PcyM_0016700	0	0.39327	0.102039	0.467847	0	0	0.240789	0		0.192129	0.107328	0.23081	0.105792	0.0615976	0.165872	0.149728	0.141018
PcyM_0016800	0.0528531	0.0158412	0.0350289	0.12006	0	0	0.0559458	0		0	0.0396649	0.260727	0.00309277	0	1.04095	0.0198325	0.326194
PcyM_0016900	0.105466	0.262935	0.121499	0.194174	0	0	0.171019	0		0.191676	0	0.359216	0	0.00994948	0.432797	0.0958382	0.200491
PcyM_0017000	0.190865	0.583721	0.147455	0.317599	0	0	0.30991	0		0	0	0.285635	0.284612	0	0.701784	0	0.318008
PcyM_0017100	0.402586	1.12933	0.480488	0.702241	0	0	0.67866	0		0	0	0.00603717	0.222575	0.00895098	0	0	0.0593907
PcyM_0017200	0.0236916	0.233519	0.0279515	0.0191514	0	0	0.0760783	0		0.227046	0.158543	0.285012	0.0917258	0	0	0.192795	0.0941844
PcyM_0017300	0.0955036	0.524944	0.197959	0.216742	0	0.000686396	0.258787	0.000343198		0.133334	0	0.528765	0.17365	0.500625	3.01064	0.0666672	1.05342
PcyM_0017400	0.115919	0.0559688	0.0570338	0.231021	0.210495	0.169956	0.114986	0.190226		7.62324	5.4962	7.46211	6.54812	10.4215	8.59298	6.55972	8.25617
PcyM_0017500	0.13741	0.178969	0.18063	0.521941	0	0	0.254737	0		0	0	0.780107	0	0	0	0	0.195027
PcyM_0017600	0.191524	0.498578	0.422969	1.0172	0	0	0.532568	0		0	0	0	0	0	0	0	0
PcyM_0017700	0.0444149	0.0916899	0.119664	0.0771242	0.0279644	0	0.0832234	0.0139822		0	0	0	0	0	0	0	0
PcyM_0017800	0.024272	0.0207336	0.0148128	0.0786104	0.000698739	0	0.0346072	0.00034937		0	0.096534	0.0560512	0.223401	0	0.00111059	0.048267	0.0701407
PcyM_0017900	0.204095	0.261936	0.176861	0.768871	0	0	0.352941	0		0	0	0	0	0	0	0	0
PcyM_0018000	1.26452	2.05196	0.561696	2.33903	0	0	1.5543	0		0	0	0.527568	0.0584085	0	0	0	0.146494
PcyM_0018100	0	0.689992	0.0355278	0.0336687	0	0	0.189797	0		0.428986	0.0565824	0	0	0	0	0.242784	0
PcyM_0018200	0.262302	0.207994	0.0505693	0.123608	0.0024906	0	0.161118	0.0012453		0.229284	0.0806456	0.88969	0.699869	0	1.55314	0.154965	0.785674
PcyM_0018300	0.0240256	0.0413912	0.0402208	0.0503219	0	0	0.0389899	0		0	0	0.0187223	0	0	0	0	0.00468059
PcyM_0018400	1.11035	1.41154	1.39864	4.12944	0	0	2.01249	0		1.94594	0	0	0	0	0	0.972969	0
PcyM_0018500	0.582378	0.371111	0.15098	0.524592	0	0	0.407265	0		0.0729186	0.153885	0.178703	0	0	0	0.113402	0.0446757
PcyM_0018600	0.0288051	0.0598074	0.0413828	0.0506816	0	0	0.0451692	0		0.146049	0	0.313183	0.04458	0.0216862	0.333207	0.0730243	0.178164
PcyM_0018700	0.168661	0.208582	0.104392	0.371331	0	0.000375762	0.213242	0.000187881		0.38591	0.0435336	0.398213	0.198393	0	2.6614	0.214722	0.814502
PcyM_0018800	2.95999	3.6131	1.64788	4.51752	0	0.0262141	3.18462	0.0131071		0.0442798	0.0934466	1.95331	0.0512186	0	0	0.0688632	0.501131
PcyM_0018900	0.529791	2.34084	0.440687	0.713181	0	0	1.00613	0		0	0	0.213252	0	0	0	0	0.0533129
PcyM_0019000	0.0609167	0.0704809	0.0671431	0.055141	0.0172504	0	0.0634204	0.00862519		0	0	0	0	0	0	0	0
PcyM_0019100	0.0161714	0.0165194	0.0237751	0.0146418	0	0	0.0177769	0		0.0633126	0	0.137762	0.270559	0.905817	0	0.0316563	0.328534
PcyM_0019200	1.11558	0.666637	1.27588	0.661834	0	0	0.929983	0		0	0	0	0	0.0408343	0.0507505	0	0.0228962
PcyM_0019300	0.291173	0.208997	0.238978	0.477373	0	0	0.30413	0		0.00412507	0	0	0.424261	0	0	0.00206254	0.106065
PcyM_0019400	0.396092	1.11951	2.62508	1.22232	0	0	1.34075	0		0.0134318	0.00480053	0	0	0.00966888	0	0.00911614	0.00241722
PcyM_0019500	0.3234	0	0.178842	0.475848	0	0	0.244522	0		0	0	0	0	0	0	0	0
PcyM_0019600	0.296172	1.31031	0.683209	1.21098	0	0	0.875167	0		0	0	0	0	1.05909	0	0	0.264773
PcyM_0019700	0.222524	0.307237	0.0906007	0.252343	0	0	0.218176	0		0	0	0	0.00795796	0.0236825	0	0	0.00791012
PcyM_0019800	0.0585953	0.199139	0.106366	0.324601	0	0	0.172175	0		0.0397052	0.0129679	0.0274996	0.027401	0.0944628	0	0.0263366	0.0373409
PcyM_0019900	0.394357	0.170697	0.201637	0.315205	0	0	0.270474	0		0	0	0.0328346	0.0654339	0	0	0	0.0245671
PcyM_0020000	0.249664	1.0307	0.37803	2.26027	0.00141174	0	0.979664	0.000705868		0	0	0.0270585	0.00250756	0	0.210922	0	0.0601219
PcyM_0020100	0.0266181	0.124209	0.206047	0.206174	0	0	0.140762	0		0	0	0	0	0.0129796	0.0488557	0	0.0154588
PcyM_0020200	0.145351	0.10315	0.146992	0.178176	0	0.356636	0.143417	0.178318		0	0.00977934	0	0	0	0.0209265	0.00488967	0.00523163
PcyM_0020300	0.140577	0.663549	0.0801862	0.221344	0	0	0.276414	0		0.16928	0	0.207428	0.207901	0.00361815	0	0.08464	0.104737
PcyM_0020400	0.394098	1.40761	0.67714	0.453304	0	0.0164811	0.733038	0.00824055		0	0	1.157	0	0	0	0	0.289249
PcyM_0020500	0.527773	0.412238	0.71661	1.19872	0	0.000820545	0.713837	0.000410272		0.205132	0	0	0.187845	0	0	0.102566	0.0469611
PcyM_0020600	0.270058	0.0739788	0.330943	1.06289	0	0	0.434468	0		0	0	0.191823	0	0	1.59062	0	0.44561
PcyM_0020700	0.30109	0.569381	0.257952	0.477375	0	0	0.401449	0		0.170763	0	0.941607	0.364868	0	0	0.0853816	0.326619
PcyM_0020800	0.344977	0.318825	0.105765	0.794213	0	0	0.390945	0		0.0439732	0.0319999	0.0805147	0.122808	0	0	0.0379866	0.0508306
PcyM_0020900	1.91675	2.01811	0.395661	2.03136	0	0	1.59047	0		0	0.169905	0.0145218	0.434091	0	0	0.0849526	0.112153
PcyM_0021000	0.136405	0.19977	0.104634	0.400371	0	0	0.210295	0		0.142947	0.150835	0.140129	0.212349	0.315971	0.0645537	0.146891	0.183251
PcyM_0021100	0.0157097	0.740452	0.0424614	0.145175	0	0	0.23595	0		0.231039	0.217454	0.66058	0.470152	0	2.95617	0.224247	1.02173
PcyM_0021200	0.00547029	0.0626558	0.0520149	0.0884491	0	0	0.0521475	0		0.0931375	0.0327591	0.228253	0.189529	0	0.420601	0.0629483	0.209596
PcyM_0021300	0.0960488	0.543584	0.19042	0.210042	0.00148457	0.0275563	0.260024	0.0145204		0.0835202	0.480705	0.474495	0.111246	0.0965599	2.05729	0.282113	0.684898
PcyM_0021400	0.19117	0.101132	0.60944	0.28383	0	0	0.296393	0		2.49933	1.79334	2.24829	1.56068	0.908143	5.4929	2.14633	2.5525
PcyM_0021500	0.136412	0.105969	0.150148	0.332728	0	0	0.181314	0		0.0223157	0	0.00965108	0	0	0	0.0111579	0.00241277
PcyM_0021600	0.0587567	0.0223226	0.00667392	0.0547789	0	0	0.035633	0		0.0284666	0.006675	0.395326	0.185369	0.00861954	0	0.0175708	0.147329
PcyM_0021700	0.0380917	0.0139971	0.0194888	0.0151959	0	0.00257313	0.0216934	0.00128657		0.254266	0.288171	1.08471	1.77071	0.119763	4.08264	0.271218	1.76446
PcyM_0021800	1.6646	1.22995	0.380296	1.32416	0	0	1.14975	0		0	0	0	0.584277	0	0.0684368	0	0.163179
PcyM_0021900	0.480168	0.386615	0.808817	1.33084	0	0.00360295	0.75161	0.00180148		0	0	0	0	0	0	0	0
PcyM_0022000	0	0.370102	0.873078	0.282318	0	0.0176878	0.381374	0.00884389		0.298774	0	0	0	0	0.0374789	0.149387	0.00936972
PcyM_0022100	0.502972	0.272356	0.169329	0.174443	0	0	0.279775	0		0	0	0	0	0.0830969	0	0	0.0207742
PcyM_0022200	1.74291	0.0289446	0.0992674	0.152311	0	0	0.505857	0		0	0	0	0	0	0	0	0
PcyM_0022300	0.356276	0.348258	0.71904	1.33037	0	0.00277186	0.688485	0.00138593		0	0	0	0	0	0	0	0
PcyM_0022400	2.68778	4.01262	1.13287	5.12886	0	0	3.24053	0		0	0	0.82822	0	0	0	0	0.207055
PcyM_0022500	0.196087	0.281397	0.0232008	0.0369986	0	0	0.134421	0		0.251553	0	0.246593	0.614274	1.83066	0	0.125776	0.672883
PcyM_0022600	2.39853	0.767527	1.14411	1.50287	0	0	1.45326	0		0	0.022846	0	0	0	0	0.011423	0
PcyM_0022700	0	0	0.147079	0.0826664	0	0	0.0574364	0		0	0	0.132505	0	0.266856	0	0	0.0998404
PcyM_0022800	0.0857067	0.00352433	0.0125713	0.0205281	0.0511767	0	0.0305826	0.0255884		0.279189	0.257771	0.598686	0.55393	0	0	0.26848	0.288154
PcyM_0022900	0	0.0292172	0.0869596	0.353277	0	0	0.117363	0		0.0608568	0.192646	0.447428	0.965953	0	0	0.126751	0.353345
PcyM_0023000	0.624487	0.662921	0.119552	0.901633	0	0	0.577148	0		0	0	0	0	0.0054907	0.00341203	0	0.00222568
PcyM_0023100	0.148165	0.182249	0.056134	0.22451	0	0	0.152764	0		0	0	0.869271	2.02443	0.0101084	0	0	0.725951
PcyM_0023200	0.401378	0.791073	0.363349	0.672002	0	0	0.556951	0		0.104445	0	0	0	0	0	0.0522224	0
PcyM_0023300	2.3647	1.72044	0.939838	2.22628	0	0	1.81282	0		0.149816	0	0.357233	0.0889881	0	0.65827	0.0749079	0.276123
PcyM_0023400	0.190926	0.349304	0.141478	0.716501	0	0	0.349552	0		0.0608338	0.0106985	0.205881	0.19241	0	0.732588	0.0357662	0.28272
PcyM_0023500	0.193829	0.239407	0.101779	0.243912	0	0	0.194732	0		0	0	0.0196177	0.0059792	0.0177938	0	0	0.0108477
PcyM_0023600	0.621935	1.4148	7.11576	6.58614	0	0	3.93466	0		0	0	0.15775	0	0	0	0	0.0394376
PcyM_0023700	0.136719	0.235422	0.567893	1.03216	0	0	0.493048	0		0	0	0	0	0	0.030784	0	0.007696
PcyM_0023800	0	0.0432698	0.0389299	0.055334	0	0	0.0343834	0		0.0428295	0	0	0	0.0162107	0	0.0214148	0.00405268
PcyM_0023900	0.142746	0.0914617	0.0914246	0.0942287	0.00255288	0	0.104965	0.00127644		0	0.19839	0.172788	0.230403	0	0.849056	0.0991948	0.313062
PcyM_0024000	0.270292	0.219834	0.229189	0.64901	0	0	0.342081	0		0	0.0561806	0.18485	0	0.0483647	0	0.0280903	0.0583036
PcyM_0024100	0.170588	0.0464274	0.0782341	0.157591	0	0	0.11321	0		0	0.00899712	0.522406	0.0123936	0	0	0.00449856	0.1337
PcyM_0024200	0.164584	0.172798	0.31606	0.235566	0	0	0.222252	0		0.202307	0	0	0.123505	0.0262532	0	0.101153	0.0374395
PcyM_0024300	1.78596	2.43588	0.767829	0.997312	0	0	1.49675	0		0.19406	0	0	0	0	0	0.09703	0
PcyM_0024400	0.0442192	0.0375748	0.0316835	0.319208	0	0.0179958	0.108171	0.00899789		0.668749	0.00750695	1.63891	0	0	0	0.338128	0.409728
PcyM_0024500	0.0434323	0.258391	0.193675	0.141206	0	0	0.159176	0		0	0	0	0	0	0	0	0
PcyM_0024600	0.420678	0.20654	0.269926	0.652394	0	0	0.387384	0		0	0	0	0	0.0562061	0	0	0.0140515
PcyM_0024700	1.14089	1.69165	0.627847	0.830143	0	0	1.07263	0		0	0	0	0	0	0	0	0
PcyM_0024800	0.659588	0.254319	0.517411	2.96962	0	0	1.10023	0		0	0	0	0	0	0	0	0
PcyM_0024900	1.04631	0.67803	1.08622	1.80886	0	0	1.15486	0		0.15901	0.00167785	0	0.194146	0	0	0.0803439	0.0485364
PcyM_0025000	0.167898	0.121244	0.226728	0.499296	0	0	0.253791	0		0	0	0.929572	0	0	0	0	0.232393
PcyM_0025100	0.21761	0.222804	0.56279	0.838978	0	0.00765474	0.460546	0.00382737		0.568923	0	0	0	0	1.92691	0.284461	0.481726
PcyM_0025200	0.591712	5.6212	0.809392	2.03139	0.00677146	0	2.26342	0.00338573		0.0184705	0	0	0.0225518	0	0.0107627	0.00923523	0.00832863
PcyM_0025300	0.0384971	0.409545	0.182071	0.651853	0	0	0.320492	0		0.0455482	0.0173022	0	0	0	0	0.0314252	0
PcyM_0025400	0.139257	0.285066	0.120134	0.244718	0	0	0.197294	0		0.133526	0.105671	0.122713	0.448335	0	0	0.119599	0.142762
PcyM_0025500	1.10098	0.152999	0.389347	1.07559	0	0	0.679731	0		0	0	0.0247611	0.0822411	0.00917797	0	0	0.029045
PcyM_0025600	0.0402515	0.160475	0.0967906	0.262832	0	0	0.140087	0		0.0203084	0.0534771	0.0835138	0.0832144	0.00905922	0	0.0368928	0.0439468
PcyM_0025700	0.00934258	0.0245652	0.00819076	0.0337901	0	0	0.0189722	0		1.04294	0.74146	2.49297	3.34638	2.54189	1.14066	0.892201	2.38048
PcyM_0025800	15.3897	21.6695	3.35219	16.4765	0	0	14.222	0		1.18557	1.17325	0.807802	1.47999	1.12685	1.54855	1.17941	1.2408
PcyM_0025900	0.6498	1.0289	0.0476654	0.175585	0	0.0168595	0.475487	0.00842975		0.248236	0.67487	0.717257	0.515481	0.267316	0.871457	0.461553	0.592878
PcyM_0026000	0.0912296	0.0746165	0.139014	0.151354	0	0	0.114054	0		0.816731	0.78918	1.2628	2.29261	0.258697	2.63493	0.802956	1.61226
PcyM_0026100	0.404869	0.514416	1.02656	3.86251	0	0	1.45209	0		0	0	0	0	0	0	0	0
PcyM_0026200	0.235316	1.45059	0.335913	0.27338	0	0.00167372	0.573799	0.000836861		0	0	0	0.0483264	0.00410907	0	0	0.0131089
PcyM_0026300	0.413566	1.40215	0.312955	0.535242	0	0.00110553	0.665977	0.000552764		0.284054	0	0	0	0	0	0.142027	0
PcyM_0026400	0.0138108	0.10796	0.034231	0.0485858	0	0	0.051147	0		0.238532	0	0	0	0	0	0.119266	0
PcyM_0026500	44.3547	64.1246	111.38	293.496	0	0.00118422	128.339	0.000592111		0	0	0.0279051	0	0.941245	0	0	0.242288
PcyM_0026600	0.0537337	0.0944747	0.0354361	0.0786279	0	0	0.0655681	0		0.280705	0	0	0.916637	0.00799963	0	0.140352	0.231159
PcyM_0026700	0.305219	0.363525	0.117	0.748684	0	0	0.383607	0		0.372517	0.0294806	0.114117	0.730888	0	1.46029	0.200999	0.576324
PcyM_0026800	0.306688	0.58788	0.197063	0.621549	0.05003	0	0.428295	0.025015		0.300375	0.528251	1.30868	0.957617	0.272856	3.12741	0.414313	1.41664
PcyM_0026900	0.0882982	0.0699054	0.106868	0.258269	0	0	0.130835	0		0.200104	0	0.00240391	0	0	0	0.100052	0.000600977
PcyM_0027000	0.254683	3.37079	0.661085	0.358798	0	0	1.16134	0		0	0	0	0	0	0	0	0
PcyM_0027100	0.05713	0.0595161	0.071552	0.0904256	0	0	0.0696559	0		0	0	0	0	0	0	0	0
PcyM_0027200	0.24456	0.972119	0.156238	0.778417	0	0	0.537833	0		0	0.163105	0.0473523	0.0471826	0	0	0.0815525	0.0236337
PcyM_0027300	0.0835404	0.506389	0.0806365	0.186429	0	0	0.214249	0		0	0	0.917217	0	0	0.0352115	0	0.238107
PcyM_0027400	0.11559	0.400905	0.126337	0.394778	0	0	0.259403	0		0.232315	0	0.0813341	0.0405213	0	0	0.116158	0.0304639
PcyM_0027500	0.0113601	0.0748769	0.0905459	0.0927293	0	0	0.0673781	0		0.53196	0	0	1.94851	0.0402687	0	0.26598	0.497196
PcyM_0027600	3.62783	4.57964	0.278496	1.5998	0	0	2.52144	0		0.00382864	0	0	0.182311	1.89892	0	0.00191432	0.520307
PcyM_0027700	0.515171	2.58602	0.249497	0.653718	0	0	1.0011	0		0	0.00928272	0.215596	0	0	0	0.00464136	0.0538989
PcyM_0027800	0.119399	0.204194	0.040987	0.191166	0	0	0.138937	0		0.0260186	0	0	0.00784851	0.0233568	0	0.0130093	0.00780133
PcyM_0027900	0.276016	0.0271013	0.104835	0.14112	0	0	0.137268	0		0	0	0.202429	0	0	0	0	0.0506071
PcyM_0028000	0.548512	2.05402	0.799908	0.901222	0	0	1.07591	0		0.127557	0.188434	0.500168	0.186891	0	0.115207	0.157995	0.200566
PcyM_0028100	0.36258	1.47848	0.472919	0.339504	0.00931679	0	0.663371	0.0046584		0.00988297	0	0.217983	0.223784	0	0	0.00494149	0.110442
PcyM_0028200	0.240098	0.625078	0.194352	0.620673	0.00232825	0	0.42005	0.00116413		0	0	0.28015	0	0.276909	0.00370058	0	0.14019
PcyM_0028300	0.386592	2.31909	1.1059	1.95065	0	0.000458172	1.44056	0.000229086		0.118668	0	0.266989	0.0941784	0.0107796	0	0.0593341	0.0929867
PcyM_0028400	0.0716423	0.0452765	0.203754	0.0968901	0	0.0204432	0.104391	0.0102216		2.89491	2.24819	2.53459	2.5757	2.88527	7.69576	2.57155	3.92283
PcyM_0028500	3.43412	2.05902	0.668631	3.23736	0	0.000744909	2.34978	0.000372454		0.0830456	0	0.0339202	0.23659	0	0	0.0415228	0.0676276
PcyM_0028600	0.26457	1.2942	0.506137	1.14842	0	0	0.803332	0		0.453031	0.00121947	0.0793036	0.395097	0	0	0.227125	0.1186
PcyM_0028700	0.0892389	1.58642	0.273235	0.199843	0	0.00282791	0.537185	0.00141396		0.00311953	0.00504039	0	0	0	0.0107858	0.00407996	0.00269644
PcyM_0028800	0.527897	0.335111	0.568614	0.970346	0	0	0.600492	0		0	0	0.0256999	0.0147956	0	0	0	0.0101239
PcyM_0028900	0.0106833	0.144011	0.0535631	0.154112	0	0	0.0905926	0		0.190836	0.000508503	0	0	0	0	0.0956722	0
PcyM_0029000	0.963995	4.71146	9.83867	13.4052	0	0	7.22984	0		0.475555	0	0.017139	0	0	13.9592	0.237778	3.49408
PcyM_0029100	0.377298	0.594914	0.458258	0.480246	0.00253128	0	0.477679	0.00126564		0.676647	0.203996	0.594814	0.35407	0	1.09131	0.440322	0.510049
PcyM_0029200	0.206554	0.892061	0.158707	0.342162	0	0	0.399871	0		0.396688	0.104645	0.121521	1.45303	0	0	0.250667	0.393637
PcyM_0029300	0.133758	0.0663382	0.13042	0.157788	0	0	0.122076	0		0.0736384	0	0.00657571	0.255533	0.380228	0	0.0368192	0.160584
PcyM_0029400	0.0328057	0.385427	0.394615	1.06211	0	0	0.46874	0		0.00895044	0	0.520956	0.00244277	0.00726958	3.07188	0.00447522	0.900637
PcyM_0029500	0.570302	1.40994	6.6463	5.22466	0	0	3.4628	0		0.163629	0	0.200504	0	0	0	0.0818143	0.0501259
PcyM_0029600	0.221031	0.231937	0.154813	0.438188	0	0	0.261492	0		0.998247	1.83484	1.34158	2.04448	3.62717	9.88852	1.41654	4.22544
PcyM_0029700	0.345266	1.24437	0.384536	0.540228	0	0	0.6286	0		0.163822	0	0	0	0	0	0.0819109	0
PcyM_0029800	0.0683988	0.024644	0.00878542	0.0287075	0	0	0.0326339	0		1.15009	0.334167	1.4357	1.29362	0.442871	2.63919	0.742127	1.45284
PcyM_0029900	13.8895	18.8866	2.8975	14.3122	0	0	12.4964	0		0.774782	0.534993	0.215982	0.853833	0.273073	2.22615	0.654887	0.89226
PcyM_0030000	0.248743	0.846301	0.256647	0.184851	0	0	0.384135	0		0.415774	0.194986	0	0.169215	1.25894	0	0.30538	0.357039
PcyM_0030100	0.0901472	0.134856	0.0398764	0.130109	0	0	0.0987473	0		0.206483	0.192301	0.404197	0.739154	0.0543671	4.21046	0.199392	1.35204
PcyM_0030200	0.0785771	0.0581111	0.118826	0.129322	0	0	0.096209	0		0.381575	0.18583	0.0498327	1.60355	0.176817	1.18249	0.283703	0.753173
PcyM_0030300	0.0413518	0.0973508	0.049047	0.0723641	0	0	0.0650284	0		2.23337	0.589155	4.37869	5.59008	3.65757	1.00857	1.41126	3.65873
PcyM_0030400	3.09668	2.91667	1.27424	7.26678	0	0	3.63859	0		4.59434	3.00335	2.50725	2.42887	1.44564	0	3.79885	1.59544
PcyM_0030500	1.34263	1.0772	0.686629	1.15446	0	0	1.06523	0		2.0812	2.56206	5.10044	3.17635	3.78107	2.34964	2.32163	3.60187
PcyM_0030600	0.0630574	0.0262026	0.0733744	0.212646	0	0	0.09382	0		0.156607	0	0.19284	0.0956057	0	0	0.0783034	0.0721114
PcyM_0030700	0.809073	3.33493	0.656084	1.07845	0.0515043	0	1.46963	0.0257521		0	0	0.0744871	0	0	0	0	0.0186218
PcyM_0030800	0.421928	1.27519	0.285593	0.579582	0.00140914	0	0.640573	0.00070457		0	0	0.1997	0.450531	0	0.00223972	0	0.163118
PcyM_0030900	0.137845	0.216061	0.285125	0.659117	0	0	0.324537	0		0	0	0	0	0	0	0	0
PcyM_0031000	0.0692723	0.059315	0.066337	0.026101	0	0	0.0552563	0		0.130416	0.131791	0.512201	0.779467	0.218711	3.80552	0.131104	1.32897
PcyM_0031100	0.807504	1.70561	0.82305	1.56501	0	0	1.22529	0		0	0	0	1.53821	0	0	0	0.384551
PcyM_0031200	3.33679	0.562316	0.514107	1.04412	0	0	1.36433	0		3.20366	0	0	0	0	0	1.60183	0
PcyM_0031300	0.0683464	0.201458	0.0961064	0.506538	0	0	0.218112	0		2.83658	0	0	0	0	64.0488	1.41829	16.0122
PcyM_0031400	0.0247947	0.108402	0.109099	0.359658	0	0	0.150489	0		0.340408	0.578792	0.521401	1.03906	0	9.60783	0.4596	2.79207
PcyM_0031500	0.146211	0.709134	0.276636	2.02343	0	0	0.788852	0		2.98763	3.28386	4.28091	3.04948	0.90464	12.3676	3.13574	5.15065
PcyM_0031600	0.400832	0.716748	0.358986	0.369301	0.00664113	0	0.461467	0.00332057		0	0.0133802	0.352198	0.169838	0.130546	0.019088	0.00669012	0.167917
PcyM_0031700	0.0271942	0.0321887	0.0309477	0.0294616	0	0.00242134	0.0299481	0.00121067		0.00827094	0	0.138992	0.129838	0.772786	0	0.00413547	0.260404
PcyM_0031800	0.163632	0.397375	0.161263	0.273382	0	0	0.248913	0		0	0	0.428594	0	0.00599317	0	0	0.108647
PcyM_0031900	1.05843	1.22773	1.16926	2.32441	0	0	1.44496	0		0	0	0	0	0	0	0	0
PcyM_0032000	1.72959	2.31593	0.996193	3.00593	0	0	2.01191	0		0.112048	0	0	0	0	0	0.0560238	0
PcyM_0032100	0.259775	0.307963	0.275296	0.177932	0	0	0.255241	0		0.0552515	0.00108272	0	0	0	0.810911	0.0281671	0.202728
PcyM_0032200	0.288028	0.3326	0.218618	0.657327	0	0	0.374143	0		0.245701	0	0	0	0	0.0231159	0.12285	0.00577898
PcyM_0032300	0.67267	0.590264	0.212713	0.567605	0	0	0.510813	0		0	0.00442835	0	0.0061001	0	0	0.00221417	0.00152503
PcyM_0032400	0.137019	0.158417	0.175784	0.329415	0	0.0108772	0.200159	0.00543859		0	0	0	0	0	0	0	0
PcyM_0032500	0.340383	0.393706	0.976581	2.08294	0	0	0.948402	0		0.0268004	0	0.702903	0	0	6.98938	0.0134002	1.92307
PcyM_0032600	1.87556	4.22025	1.0482	3.57907	0	0	2.68077	0		0	0.00934709	0.0108545	0.304415	0	0	0.00467355	0.0788173
PcyM_0032700	2.40308	0.373709	0.174984	0.269187	0	0.0109984	0.805241	0.00549919		0	0.00501477	0	0	0	0.010731	0.00250739	0.00268274
PcyM_0032800	0.619374	0.257145	0.482952	2.61489	0	0	0.993591	0		0	0	0	0	0	0	0	0
PcyM_0032900	0.124749	0.0426332	0.318058	0.0437473	0	0	0.132297	0		0	0.0245368	0	0	0	0	0.0122684	0
PcyM_0033000	0.472233	0.567011	0.332136	1.08601	0	0	0.614347	0		0	0	0	0	0	0	0	0
PcyM_0033100	0.151858	0.228899	0.150127	0.213101	0.00194619	0	0.185996	0.000973095		0.0964398	0	0.297955	0.181486	0.540093	0	0.0482199	0.254884
PcyM_0033200	0.0425623	0.0329586	0.0222866	0.0777433	0.145848	0	0.0438877	0.0729242		0	0.751033	1.21871	0	3.07175	1.79657	0.375516	1.52176
PcyM_0033300	0.855129	0.673348	0.693133	0.708577	0	0.00170456	0.732547	0.000852278		1.12291	2.06291	1.36891	0.0106563	2.02961	0.00650125	1.59291	0.85392
PcyM_0033400	0.421177	0.730751	0.368914	0.575841	0.153886	0.0621246	0.524171	0.108005		36.8333	34.326	41.7907	41.0003	90.7487	73.4533	35.5797	61.7483
PcyM_0033500	0.0435235	0.11479	0.0332011	0.365947	0.524673	0.0706047	0.139365	0.297639		41.2449	29.4684	44.0122	40.4082	52.7597	51.1201	35.3567	47.075
PcyM_0033600	0.28208	0.509775	0.124976	0.693404	0	0.074696	0.402559	0.037348		31.4171	23.8313	26.5925	30.1174	32.3211	36.8463	27.6242	31.4693
PcyM_0033700	0.36135	0.570635	0.375833	0.415149	0	0.00194295	0.430742	0.000971477		0.131278	0.21471	0.488775	0	0	0	0.172994	0.122194
PcyM_0033800	0.424218	0.327539	0.201649	0.353157	0	0	0.326641	0		0.0318254	0.359254	0.118211	0.00180734	0.231278	0	0.19554	0.0878241
PcyM_0033900	0.0564412	0.0204131	0.0290291	0.521009	0	0	0.156723	0		0.130894	0	0.160392	0.479452	0	0	0.0654471	0.159961
PcyM_0034000	0.41239	0.482375	0.287473	0.501019	0	0	0.420814	0		0	0	0	0	0.241604	0	0	0.0604011
PcyM_0034100	0.222048	0.578592	0.19792	0.397995	0	0	0.349139	0		0	0	0.0208478	0	0.0229616	0	0	0.0109524
PcyM_0034200	0.128858	0.141175	0.277458	0.532957	0.00334939	0	0.270112	0.0016747		0	0	0.0121575	0	0	0	0	0.00303937
PcyM_0034300	0.22003	0.351021	0.150165	0.770553	0	0	0.372942	0		0.182192	0.0516483	0.179934	0.0193518	0	0.116661	0.11692	0.0789865
PcyM_0034400	0.613643	0.714925	0.276219	0.28588	0	0	0.472667	0		0.0902827	0	0.3168	0	0	0	0.0451413	0.0792
PcyM_0034500	0.293822	0.179527	0.455754	0.492777	0	0	0.35547	0		0	0	0	0	0	0	0	0
PcyM_0034600	0.436021	0.409556	0.875733	1.33942	0	0.00143144	0.765182	0.000715718		0	0	0	0.983082	0	0	0	0.24577
PcyM_0034700	0.233803	0.206813	0.0847396	0.2379	0	0	0.190814	0		0	0	0	5.04896	0.044063	0.0969767	0	1.2975
PcyM_0034800	0.00891356	0.0329843	0.0570269	0.074253	0	0	0.0432945	0		0.120453	0.222424	0	0	0	0.135988	0.171438	0.0339971
PcyM_0034900	0.482218	0.890183	0.865009	2.64238	0	0	1.21995	0		0	0	0	0	0.0120067	0	0	0.00300169
PcyM_0035000	0.467308	2.27413	0.830472	1.48468	0	0	1.26415	0		0	0	0	0	0.0463887	0	0	0.0115972
PcyM_0035100	0.271953	0.825623	0.132748	0.389142	0.0046446	0	0.404867	0.0023223		0.304057	0	0	0	0	0.00738224	0.152029	0.00184556
PcyM_0035200	0.0145288	0.0930491	0.421788	0.477421	0	0	0.251697	0		0	0.00628421	0	0	0	0	0.0031421	0
PcyM_0035300	0.295047	0.603744	0.32079	0.365894	0	0	0.396369	0		0	0.00506079	0	0	0.0101931	0	0.00253039	0.00254827
PcyM_0035400	0.116249	0.051684	0.0551329	0.0481666	0	0	0.0678082	0		0.215064	0.25082	0.37449	0.373148	0.320803	0.00102233	0.232942	0.267366
PcyM_0035500	0.291496	0.310435	4.41278	0.502508	0.227948	0.184048	1.37931	0.205998		41.1536	41.7434	50.5707	48.3492	45.4671	98.1	41.4485	60.6218
PcyM_0035600	0.431131	0.648049	0.429314	0.565859	0	0.0024027	0.518588	0.00120135		0.00450948	0.008565	0	0.198213	0	0	0.00653724	0.0495533
PcyM_0035700	0.205063	0.58396	0.0953281	0.240837	0.00539336	0	0.281297	0.00269668		0	0.124186	0.0288428	0	0	0.00857233	0.0620931	0.00935379
PcyM_0035800	4.98443	0.111009	2.00997	3.16776	0	0	2.56829	0		0.0724072	0	0.0443624	0.13261	0.460415	0	0.0362036	0.159347
PcyM_0035900	0	0.0355132	0.0413408	0.0512711	0	0	0.0320313	0		0.0242233	0	0	0	0.0330061	0	0.0121116	0.00825151
PcyM_0036000	0.0742409	0.0713491	0.0152286	0.0309521	0	0	0.0479427	0		0.067342	0.0449374	0.0279383	0.124924	0	0.433358	0.0561397	0.146555
PcyM_0036100	0.227283	0.370379	0.460302	0.508038	0	0.00757336	0.3915	0.00378668		0	0	0.0614962	0.159317	0.0179591	0	0	0.0596931
PcyM_0036200	0.228343	1.60697	0.597922	1.5924	0.0191301	0	1.00641	0.00956504		0.0279541	0	0	0	0	0	0.0139771	0
PcyM_0036300	0.335461	0.0834604	0.128947	0.233111	0	0	0.195245	0		0	0.0156306	0	0.0215313	0	0	0.00781529	0.00538283
PcyM_0036400	0.325415	0.790679	0.152044	0.516944	0	0	0.446271	0		0	0	0.219971	0	0.019766	0.012283	0	0.0630049
PcyM_0036500	0.26924	0.255185	0.244601	0.463104	0	0	0.308033	0		0	0	0	0.0092209	0	0	0	0.00230522
PcyM_0036600	0.469666	0.373639	0.836047	1.32857	0	0.00495773	0.751981	0.00247887		0	0	1.51872	0	0	0	0	0.37968
PcyM_0036700	0.458284	1.55231	0.303784	0.539409	0.0178179	0.00437424	0.713446	0.0110961		0	0	1.33998	0	0	0	0	0.334994
PcyM_0036800	0.0873714	0.205691	0.08284	0.12227	0	0	0.124543	0		0	0	0.945893	0.471251	0.0100173	0	0	0.35679
PcyM_0036900	1.25122	1.53575	0.813768	1.05309	0	0	1.16346	0		0	0	0	0	0	0	0	0
PcyM_0037000	0.229403	0.335606	0.256416	0.372047	0	0	0.298368	0		0	0	0	0.00804375	0	0	0	0.00201094
PcyM_0037100	0	0.121433	0.201162	0.0763248	0	0	0.09973	0		0.0325192	0.617648	0.0137934	0	0	3.30422	0.325084	0.829503
PcyM_0037200	0.196198	0.304594	0.0785852	0.222416	0	0	0.200448	0		0	0.0657903	0	0.00179122	0.00533058	0	0.0328952	0.00178045
PcyM_0037300	0.585073	1.5572	1.27976	1.48174	0	0	1.22594	0		0	0	0	0.0639103	0	0	0	0.0159776
PcyM_0037400	0.00779498	0.0224055	0.0149945	0.0156447	0	0	0.0152099	0		0.275125	0.0902093	0.0171793	0.324422	0.0344717	0	0.182667	0.0940182
PcyM_0037500	0.0309259	0.090683	0.0158554	0.0132234	0	0	0.0376719	0		0.11544	0.239109	0.586777	1.02318	0.10098	0.810937	0.177274	0.630468
PcyM_0037600	0.113332	0.00271525	0.00150102	0.0013379	0	0	0.0297215	0		0.261504	0	0.234987	0.0851434	0.0475093	0	0.130752	0.0919098
PcyM_0037700	3.26086	3.77915	6.6358	7.9426	0	0	5.4046	0		0	0	0	0.502439	0	0	0	0.12561
PcyM_0037800	0	0.455616	0.0582906	0.111221	0	0	0.156282	0		0.171354	0.181859	0.0763525	0.0570591	0	0	0.176606	0.0333529
PcyM_0037900	0.148374	0.222357	0.238466	0.781575	0	0	0.347693	0		0.171475	0.28146	0.204282	0.20355	0.424029	0	0.226468	0.207965
PcyM_0038000	0.619298	0.840132	0.703586	1.8207	0	0.00581011	0.99593	0.00290506		0	0	0	0.269113	0	0	0	0.0672784
PcyM_0038100	0.134517	0.360097	0.124179	0.306205	0	0	0.23125	0		0	0.0189894	0	0	0	0	0.00949471	0
PcyM_0038200	0.112226	0.0909554	0.242256	0.498416	0	0	0.235963	0		0	0	0.00939252	0	0	0	0	0.00234813
PcyM_0038300	1.00621	1.13182	1.69625	4.73141	0	0	2.14142	0		0.44404	0.937088	0.544108	1.09722	0	0.919071	0.690564	0.640101
PcyM_0038400	0.214845	0.297994	0.11138	0.262233	0	0	0.221613	0		0	0	0	0.00705506	0.0209956	0	0	0.00701265
PcyM_0038500	0.552105	1.43558	6.85761	5.24084	0	0	3.52153	0		0.279568	0	0.11419	0.227562	0	0	0.139784	0.085438
PcyM_0038600	0.821874	2.90578	0.511518	1.22113	0	0	1.36508	0		0	0	0	0	0	0	0	0
PcyM_0038700	0.197535	0.35451	0.16671	0.319736	0	0	0.259623	0		0.0493911	0	0	0	0	0	0.0246956	0
PcyM_0038800	0.331086	0.692978	0.295257	0.643224	0	0	0.490636	0		0	0	0	0	0.863972	0	0	0.215993
PcyM_0038900	0.167058	1.55362	0.0907861	0.640646	0	0	0.613028	0		0.218599	0.576657	0.100448	0.220089	0.148929	0	0.397628	0.117367
PcyM_0039000	0.363457	0.365535	0.106236	0.426397	0	0	0.315406	0		0.0357628	0.0135851	0	0.0187136	0	0	0.0246739	0.0046784
PcyM_0039100	0.0106048	0	0.0320675	0.0894721	0	0	0.0330361	0		0	0	0	0	0	0	0	0
PcyM_0039200	0.111204	0.0696309	0.101996	0.286346	0	0	0.142294	0		0	0	0.00751811	0	0	0	0	0.00187953
PcyM_0039300	1.00727	0.739706	0.23198	15.9876	0	0	4.49164	0		0.0247011	0	0	0.00674147	0.0200623	0	0.0123506	0.00670094
PcyM_0039400	0.476196	2.08863	0.993825	1.40027	0	0	1.23973	0		0	0	0	0	0	0	0	0
PcyM_0039500	0.0800172	0.0637276	0.0236791	0.0279796	0	0	0.0488509	0		0.0219724	0.142115	0.500274	0.38778	0.0729943	0.0793804	0.0820435	0.260107
PcyM_0039600	0	0.0561699	0.0295485	0.0320489	0	0.0108442	0.0294418	0.00542211		0	0	0	0	0.0305056	0	0	0.0076264
PcyM_0039700	0.47935	0.361717	0.817643	1.39266	0	0.00195941	0.762844	0.000979704		0.122461	0	0	0	0	0	0.0612303	0
PcyM_0039800	0.0177207	0.253969	0.0971228	0.139293	0	0	0.127026	0		0	0	0	0	0	0	0	0
PcyM_0039900	0.386774	1.37573	0.242488	0.462757	0	0.00356661	0.616937	0.00178331		0	0	0	0	0	0	0	0
PcyM_0040000	0.250611	0.0387423	0.109572	0.233062	0	0	0.157997	0		0	0	0	0	0	0	0	0
PcyM_0040100	0.233229	0.702618	0.106357	0.328125	0.00095277	0	0.342582	0.000476385		0	0.197444	0	0.15231	0	0.00151436	0.0987221	0.0384561
PcyM_0040200	0.433862	1.1957	0.486153	0.804746	0	0	0.730115	0		0	0	0.00635611	0.234333	0.00942386	0	0	0.0625283
PcyM_0040300	0.181041	0.488897	0.14767	0.258146	0	0	0.268938	0		0	0.199427	0.173692	0.288449	0.343365	1.28025	0.0997136	0.521438
PcyM_0040400	0.121434	0.244902	0.165962	1.22711	0	0	0.439852	0		0	0	0.485768	1.1528	0.571778	0	0	0.552585
PcyM_0040500	0.184434	1.04232	0.891445	0.809037	0	0	0.73181	0		0	0	0	0	0.00970786	0	0	0.00242696
PcyM_0040600	1.59598	2.07284	0.925523	2.54463	0	0	1.78474	0		0	0	0	0	0	0	0	0
PcyM_0040700	0.409573	0.130054	0.162155	1.54665	0	0	0.562107	0		0	0	0	0	0	0	0	0
PcyM_0040800	1.35509	7.71443	1.5567	4.45729	0	0	3.77088	0		0	0	0.153145	0	0	0	0	0.0382862
PcyM_0040900	1.53512	1.51072	4.01528	6.73974	0	0	3.45022	0		0	0	0	0	0.831438	0	0	0.207859
PcyM_0041000	0.0311735	0.83306	0.275386	0.244846	0	0.00856204	0.346116	0.00428102		0.77134	0.432388	0.420327	0.264875	0.788258	2.14078	0.601864	0.903561
PcyM_0041100	0.773716	1.37343	0.278645	0.499537	0	0	0.731332	0		0.193891	0	0	0.246204	0	0	0.0969456	0.061551
PcyM_0041200	0.583204	0.262135	0.156734	0.971951	0	0	0.493506	0		0.974977	0.576858	0.949165	0.96054	0	4.55474	0.775917	1.61611
PcyM_0041300	0.196033	0.0812494	0.0453046	0.341592	0	0	0.166045	0		0.284237	0.0333247	0.587316	1.38817	0.229508	0	0.158781	0.551249
PcyM_0041400	0.239815	0.0854989	0.14229	0.134621	0.0123477	0	0.150556	0.00617384		0.378908	0	0	0	0	0	0.189454	0
PcyM_0041500	0.278416	0.212618	0.375162	0.687999	0	0	0.388548	0		0	0.0981111	0.0835515	0.0454102	0	0	0.0490556	0.0322404
PcyM_0041600	0.138911	0.259263	0.0716815	0.224275	0	0	0.173533	0		0.053748	0.226856	0.131721	0.39543	0	0	0.140302	0.131788
PcyM_0041700	0.479076	0.445516	0.941772	1.66148	0	0.00341062	0.88196	0.00170531		0	0	0	0	0	0	0	0
PcyM_0041800	0.364097	0.0737832	0.119385	0.424994	0	0	0.245565	0		0	0	0.179645	0	0	0	0	0.0449112
PcyM_0041900	0.854169	1.48132	1.00796	1.29613	0	0	1.1599	0		0	0	0.434812	0	0	0	0	0.108703
PcyM_0042000	0.521406	0.372603	0.233489	0.501006	0	0	0.407126	0		0	0.0972655	0.338856	0	0.837337	1.35288	0.0486328	0.632269
PcyM_0042100	0.33089	0.447672	0.458954	0.388664	0	0	0.406545	0		0.095814	0.0773129	0.186469	0.13763	0	0.381784	0.0865635	0.176471
PcyM_0042200	0.0163836	0.0240457	0.0187867	0.0585744	0	0	0.0294476	0		0	0.133296	0	0	0	0	0.066648	0
PcyM_0042300	0.00113561	0.0161504	0.0230769	0.133947	0	0	0.0435774	0		0.131828	0.255022	0.376919	0.0268263	0	1.38909	0.193425	0.44821
PcyM_0042400	0.0585155	0.0223665	0.023246	0.108741	0	0	0.0532173	0		0	0.0394947	0.259608	0.0030795	0	1.03649	0.0197473	0.324793
PcyM_0042500	0.765374	1.45483	0.984941	2.25641	0	0	1.36539	0		0	0.0200043	0.74035	0	0	0	0.0100021	0.185087
PcyM_0042600	0.0429373	0.490467	0.176047	0.676027	0	0	0.34637	0		0	0.0142494	0	0	0	0	0.00712471	0
PcyM_0042700	0.422337	0.617328	1.31184	1.8513	0	0	1.0507	0		0.143544	0	0	0.0876312	0	0	0.071772	0.0219078
PcyM_0042800	0.219231	0.151431	0.228554	0.64482	0	0	0.311009	0		0	0	0.0657093	0	0	0	0	0.0164273
PcyM_0042900	0.00836257	0.00482677	0.0114336	0.0347196	0	0	0.0148356	0		0.0470243	0	0.139196	0.137796	0	0.0035393	0.0235122	0.0701328
PcyM_0043000	0.235726	0.282397	0.362227	0.445674	0	0	0.331506	0		0.0714103	0.226053	0.175006	0.0885571	0.00407015	0	0.148732	0.0669084
PcyM_0043100	0.0674723	0.0630041	0.122168	0.278192	0	0	0.132709	0		1.68462	0.882664	0.768761	0.638338	1.7097	1.18049	1.28364	1.07432
PcyM_0043200	0.0440421	7.8468	0.0631016	0.139556	0	0	2.02337	0		0.147659	0	0.585377	0.807532	0.13972	2.29217	0.0738293	0.956201
PcyM_0043300	0.0163506	0.0798892	0.073854	0.0945195	0	0	0.0661533	0		0.13877	0.181292	0.161946	0.0322731	0	0.089525	0.160031	0.070936
PcyM_0043400	0.161335	0.121716	0.380831	0.145021	0.00347085	0.00171966	0.202226	0.00259526		0.228993	0.370874	1.57918	2.34843	1.08361	0.793622	0.299934	1.45121
PcyM_0043500	0.270641	1.51383	0.526154	0.985685	0	0.00115112	0.824078	0.000575559		0.0298144	0	0.265697	0.0546036	0.108332	1.31273	0.0149072	0.435342
PcyM_0043600	0.00771093	0.489495	0.126171	0.641126	0	0	0.316126	0		0.142143	0.095446	0.248068	0.12096	0.0469528	0.189653	0.118794	0.151409
PcyM_0043700	0.0531341	0.0231936	0.0266129	0.114661	0	0	0.0544004	0		0	0.0415823	0.273331	0.00324227	0	1.11226	0.0207911	0.347208
PcyM_0043800	0.105736	0.0406612	0.0289876	0.20081	0	0	0.0940488	0		0.050746	0.0160639	1.06331	0.446105	0.110633	0	0.0334049	0.405012
PcyM_0043900	0.154449	0.796651	0.335032	1.48923	0	0	0.69384	0		0.966076	0.360683	0.930703	0.951771	0	4.51316	0.66338	1.59891
PcyM_0044000	0.651458	1.29626	0.230487	0.510585	0	0	0.672198	0		0	0.0353355	0.0351721	0.0408871	0	0.00540096	0.0176677	0.020365
PcyM_0044100	0.141576	0.195734	0.142977	0.145447	0.00527563	0	0.156434	0.00263781		0.00359758	0.170825	0.277724	0.204252	0	0	0.0872112	0.120494
PcyM_0044200	0.0641315	0.226005	0.0356024	0.0701675	0	0	0.0989766	0		0	0	0.483105	0	0	0.900105	0	0.345803
PcyM_0044300	0.637949	3.61146	1.3267	1.44213	0	0.00126401	1.75456	0.000632004		0	0	0.0109408	0	0.029739	0	0	0.0101699
PcyM_0044400	0.0863061	0.0531188	0.489093	0.141595	0	0	0.192528	0		2.87121	2.07644	3.85669	0.772788	0.418142	11.0433	2.47382	4.02273
PcyM_0044500	0.0331892	2.1344	0.0479054	0.107055	0	0	0.580637	0		0.156004	0	0.4779	0	0.708556	0	0.0780018	0.296614
PcyM_0044600	0.164082	0.895546	0.51513	1.47103	0	0.000504875	0.761448	0.000252438		0	0.0665908	0.15466	0.308212	0	0.00593732	0.0332954	0.117202
PcyM_0044700	0.109226	0.6681	0.0523647	0.0320441	0	0	0.215434	0		0.00846472	0	0	0.186032	0.00522287	0	0.00423236	0.0478138
PcyM_0044800	2.61398	0.862773	0.678331	1.75371	0	0	1.4772	0		0	0	0	0.220445	0	0	0	0.0551113
PcyM_0044900	0.141485	0.298466	0.120302	0.333444	0	0	0.223424	0		1.44679	0.0291448	0	0	0	0	0.737968	0
PcyM_0045000	0.199238	0.112956	0.231098	0.514029	0	0	0.26433	0		0	0	1.64652	0	0	0	0	0.41163
PcyM_0045100	0.0685923	0.263622	0.173553	0.322678	0	0	0.207112	0		0.0330184	0.010784	0.0228683	0.0227864	0.0785543	3.87682	0.0219012	1.00026
PcyM_0045200	0.405477	0.654538	0.597182	0.811922	0.00112183	0	0.61728	0.000560916		0	0.0726498	0	0.588942	0.00147159	1.24477	0.0363249	0.458795
PcyM_0045300	0.159433	0.459854	0.193201	0.324943	0	0	0.284358	0		1.4969	0.402773	4.58558	3.67635	0	0	0.949835	2.06548
PcyM_0045400	1.02592	1.50478	0.820745	2.33475	0	0	1.42155	0		0.240144	0	0.588524	0.293207	1.527	1.6267	0.120072	1.00886
PcyM_0045500	0.388264	0.537548	0.368286	0.33083	0.0107701	0	0.406232	0.00538505		0	0.0216991	0.571168	0.27543	0.21171	0.0309555	0.0108496	0.272316
PcyM_0045600	0.509617	1.47527	0.239028	0.666754	0.00623608	0.0109857	0.722668	0.00861087		0	0	0	0.498451	0	0.00991178	0	0.127091
PcyM_0045700	0.0521242	0.0261524	0.241515	0.0832047	0	0	0.100749	0		0.0438615	0	0.0454774	0	0	0	0.0219307	0.0113693
PcyM_0045800	0.0540319	0.906757	0.311131	0.257805	0	0.0121673	0.382431	0.00608367		0.791653	0.443775	0.424401	0.271851	0.809017	2.19716	0.617714	0.925607
PcyM_0045900	1.20569	1.16863	3.1235	5.22021	0	0	2.67951	0		0	0	0	0	1.0739	0	0	0.268475
PcyM_0046000	1.76033	4.56603	0.6568	1.95846	0.0113495	0.0534549	2.23541	0.0324022		0.0677203	0.571659	0	0.00440982	0	1.83491	0.31969	0.459831
PcyM_0046100	0.393472	0.264683	0.164687	0.232249	0	0	0.263773	0		0.103552	1.20194	0.634443	0.505735	0.564392	3.03962	0.652744	1.18605
PcyM_0046200	0.139749	0.0857003	0.147269	0.356393	0	0	0.182278	0		0	0	0.00803823	0	0	0	0	0.00200956
PcyM_0046300	0.345053	1.59877	0.23618	1.70993	0	0	0.972482	0		0	0	0	0.53786	0	0	0	0.134465
PcyM_0046400	0.172827	0.27819	0.424275	0.796302	0	0	0.417899	0		0.118858	0.250834	0.485479	0	0	0.00263114	0.184846	0.122027
PcyM_0046500	0.861427	2.49095	0.68383	1.38611	0	0	1.35558	0		0	0	0.886306	0	0	0	0	0.221577
PcyM_0046600	2.53169	1.90448	1.05424	1.64397	0	0.506423	1.78359	0.253212		33.7665	36.1593	33.3861	41.8403	34.7009	47.5673	34.9629	39.3736
PcyM_0046700	0.485914	1.33731	0.0630409	0.199399	0	0	0.521416	0		0	0	0	0.0116418	0.0346454	0	0	0.0115718
PcyM_0046800	0.371108	0.98791	0.658418	0.568465	0	0	0.646475	0		0	0	0	0.172734	0.0107093	0	0	0.0458608
PcyM_0046900	0.373602	0.130365	0.0210371	0.0586273	0	0	0.145908	0		0	0	0.678046	0.257325	0	0.413118	0	0.337122
PcyM_0047000	0.351318	0.975405	1.45064	2.44958	0	0	1.30673	0		0	0	0.0718604	0.0716028	0.213087	0.572066	0	0.232154
PcyM_0047100	0.221857	0.154151	0.131009	0.206244	0	0	0.178315	0		0	0	0	0	0	0	0	0
PcyM_0047200	0.539558	5.09824	0.38168	0.654644	0	0	1.66853	0		0	0	0	2.05452	0	0	0	0.513629
PcyM_0047300	0.105258	0.0736312	0.0900258	0.270503	0	0	0.134855	0		0.317514	0	0	0	0	0.358466	0.158757	0.0896166
PcyM_0047400	0.625695	1.20031	0.298489	0.371518	0	0	0.624004	0		0	0	0	0	0	0	0	0
PcyM_0047500	0.449273	1.32726	0.195471	0.621099	0.0151142	0	0.648275	0.00755709		0	0	0	0	0	0.00766687	0	0.00191672
PcyM_0047600	0.0121234	0.260511	0.153131	0.271364	0	0	0.174283	0		0.16035	0	0.196486	0	0	0	0.0801752	0.0491216
PcyM_0047700	0.938785	4.90118	9.90529	13.4838	0	0	7.30727	0		0.0247433	0	2.22004	0	0	0	0.0123716	0.555009
PcyM_0047800	0.604456	0.569755	0.424637	1.17839	0	0	0.694309	0		0	0	0	0	0	0	0	0
PcyM_0047900	0.24132	0.035772	0.602266	1.22455	0.012094	0	0.525978	0.00604699		0	0	0	0	0	0	0	0
PcyM_0048000	3.5893	1.35668	0.174931	2.22597	0	0	1.83672	0		0	0	0.103367	0.377654	0	0	0	0.120255
PcyM_0048100	0.186535	0.218916	0.610426	0.229812	0	0	0.311422	0		0	0	0	0	0	0	0	0
PcyM_0048200	0.0393978	0.0855653	0.0840933	0.290615	0	0	0.124918	0		0.00117055	0.0197656	0.017499	0.189501	0	0.230323	0.0104681	0.109331
PcyM_0048300	0.578126	1.33785	6.77911	5.19335	0.00495504	0	3.47211	0.00247752		0.152053	0	0	0	0.828738	0	0.0760266	0.207184
PcyM_0048400	0.199895	0.846495	0.0935356	0.24561	0	0	0.346384	0		0	0	0	0.00927074	0.0275893	0	0	0.00921501
PcyM_0048500	1.15667	1.89614	0.274919	1.29637	0	0	1.15602	0		0	0	0.0827708	0	0	0	0	0.0206927
PcyM_0048600	0.741224	3.91565	8.00665	10.9306	0	0	5.89852	0		0	0	0.299	0	0	0	0	0.07475
PcyM_0048700	0.160662	0.106954	0.234972	0.384846	0	0	0.221859	0		0.0176233	0	0.00762172	0	0	0	0.00881167	0.00190543
PcyM_0048800	0.28421	0.342014	0.217206	0.267907	0	0	0.277834	0		0.0501778	0.0137662	0	0	0	0	0.031972	0
PcyM_0048900	1.06736	35.5891	0.839645	0.638198	0	0	9.53358	0		0	0.0321646	0.0343637	0	0	0	0.0160823	0.00859093
PcyM_0049000	0.204708	0.159068	0.117352	0.228118	0	0	0.177312	0		0.0215033	0.0680699	0.237143	0.131274	0	0	0.0447866	0.0921044
PcyM_0049100	0.48496	1.2589	5.97646	4.53629	0	0	3.06415	0		0	0	0.607493	0	0	0	0	0.151873
PcyM_0049200	0.113576	0.501171	0.053649	0.164934	0	0	0.208332	0		0	0	0	0.00748974	0.0222892	0	0	0.00744472
PcyM_0049300	1.10474	1.85332	0.262578	1.17452	0	0	1.09879	0		0	0	0.118631	0	0	0	0	0.0296577
PcyM_0049400	0.298798	0.730533	0.428161	0.867965	0.0154954	0	0.581364	0.00774769		0	0.00533766	0	0	0	0	0.00266883	0
PcyM_0049500	0.474648	0.737858	0.24315	0.755913	0	0	0.552892	0		0.3879	0	0	0	0.0213553	0.0132706	0.19395	0.00865648
PcyM_0049600	0.095402	0.107726	0.16458	0.189284	0	0	0.139248	0		0	0.0784555	0	0.0929178	0.00635677	0	0.0392278	0.0248186
PcyM_0049700	0.349179	0.638106	0.272061	0.566947	0	0.00136806	0.456573	0.000684031		0	0	0	0	0	0.386121	0	0.0965302
PcyM_0049800	0.627551	0.0536489	0.481252	0.0161436	0	0	0.294649	0		0	0	0	0	0	0	0	0
PcyM_0049900	0.440308	1.31975	0.309071	0.504794	0	0.0018002	0.643481	0.000900098		0	0	1.10292	0	0	0	0	0.27573
PcyM_0050000	0.394154	1.14191	0.171708	0.539314	0.00075618	0	0.561771	0.00037809		0.0990062	0.417879	0.426397	0.725299	0.0899357	0.00120189	0.258443	0.310708
PcyM_0050100	0.858866	0.99861	0.689612	0.830371	0.0165559	0	0.844365	0.00827795		0	0	0	0	0	0	0	0
PcyM_0050200	0.0289242	0.0941633	0.0539895	0.0580464	0	0.0060273	0.0587809	0.00301365		0.132354	0	1.45963	0.161599	0.00687018	0	0.0661768	0.407024
PcyM_0050300	0.226122	0.117589	0.89427	0.160057	0.00411936	0	0.34951	0.00205968		0.00187272	0	0.103264	0	0	0.0079285	0.000936362	0.0277981
PcyM_0050400	0	0.00690818	0.0304082	0.0225976	0	0.00200532	0.0149785	0.00100266		0.08807	0	0	0	0	0	0.044035	0
PcyM_0050500	1.43416	3.26044	1.93782	7.38622	0	0	3.50466	0		1.47542	0.0169222	0.0695353	0	0	0	0.746171	0.0173838
PcyM_0050600	0.0604497	0.956549	0.0447779	0.0549221	0	0	0.279175	0		0	0	0	0	0	0	0	0
PcyM_0050700	0.0157313	0.014515	0.021882	0.0172905	0	0	0.0173547	0		0.16406	1.8177	0.175904	0	0	0.972409	0.990879	0.287078
PcyM_0050800	0.00704915	0.109053	0.0118861	0.0540769	0.00503056	0	0.0455163	0.00251528		0.0771853	0.01253	0.126106	0.062827	0.430032	1.87415	0.0448576	0.62328
PcyM_0050900	0.113508	0.477939	0.018738	0.100382	0	0.0690345	0.177642	0.0345172		10.0673	2.21481	12.2885	14.1902	65.5334	34.2364	6.14107	31.5621
PcyM_0051000	0.84788	0.892515	0.170917	0.55283	0	0	0.616035	0		0.0796762	0.252219	0.408051	0.162136	0.616129	6.73887	0.165948	1.9813
PcyM_0051100	0.00585846	0.0496779	0.00979577	0.0190456	0	0	0.0210944	0		0.052453	0	0.796102	0	0	3.31623	0.0262265	1.02808
PcyM_0051200	0.164714	0.2445	0.229111	0.339274	0	0	0.244399	0		0.0801299	0.0507311	0.0785502	0.0596223	0.00274028	0	0.0654305	0.0352282
PcyM_0051300	0.247582	1.35095	0.476334	0.543409	0	0.00141371	0.654568	0.000706853		0.86962	0.714769	1.44799	0.637065	0.33261	0.0413382	0.792195	0.61475
PcyM_0051400	0.0868172	0.0775947	0.0961676	0.0773008	0	0	0.0844701	0		0.00702279	2.00079	0.542142	0.398718	0	0	1.00391	0.235215
PcyM_0051500	1.16403	2.22889	0.391045	0.988762	0	0	1.19318	0		0	0	0	0	0	0	0	0
PcyM_0051600	0.0775981	0.338211	0.216528	0.380224	0	0	0.25314	0		0	0	0	0	0	0	0	0
PcyM_0051700	0.79098	0.864515	0.418458	1.18631	0.0300835	0	0.815067	0.0150418		0	0	0.565601	0	0	0	0	0.1414
PcyM_0051800	0.391624	1.39378	0.257257	0.555639	0	0.00107258	0.649574	0.000536292		0	0	0.328568	0.0818476	0	0	0	0.102604
PcyM_0051900	0.830938	1.45155	0.734958	2.68625	0	0	1.42592	0		0	0	0	0.258603	0	0	0	0.0646506
PcyM_0052000	0.183047	0.454654	0.181867	0.241629	0.00779995	0	0.265299	0.00389998		0.119677	0.378844	0	1.02285	0.22985	0	0.24926	0.313175
PcyM_0052100	0.429813	1.49912	0.318653	0.535445	0	0.00420691	0.695757	0.00210346		0	0	0	0	0	0	0	0
PcyM_0052200	1.98654	5.98717	0.95466	1.27779	0.00363462	0	2.55154	0.00181731		0	0	0	0.0030262	0	0	0	0.000756551
PcyM_0052300	0.0213524	0.0681496	0.0219914	0.093624	0.191164	0.00424034	0.0512793	0.0977022		1.05219	0.88427	1.37732	1.41912	2.90523	1.60839	0.968228	1.82752
PcyM_0052400	0.197049	0.309428	0.166104	0.313328	0	0	0.246477	0		0	0.0125441	0	0.181716	0.0128757	0	0.00627205	0.0486478
PcyM_0052500	6.56925	7.98627	1.5447	4.2788	0.00877758	0	5.09476	0.00438879		0	0	0	0	0	0	0	0
PcyM_0052600	0.492948	1.5552	0.316278	0.481802	0	0.000723463	0.711558	0.000361731		0.180862	0	0.225883	0.110413	0.492877	0	0.0904311	0.207293
PcyM_0052700	0.379135	0.41066	0.101098	0.814397	0	0	0.426322	0		0.227969	0.0687285	0	0.178935	0	0.0700334	0.148349	0.062242
PcyM_0052800	0.267829	0.0657528	0.207193	0.293549	0	0	0.208581	0		0.278665	0.00588086	0	0.00810096	0	0	0.142273	0.00202524
PcyM_0052900	3.50431	6.57787	3.8835	11.0954	0.016337	0	6.26526	0.00816849		0	0	0	0	0	0	0	0
PcyM_0053000	1.24622	4.57142	1.07039	3.72541	0	0	2.65336	0		0	0.056214	0.0652798	0.00948585	0	0	0.028107	0.0186914
PcyM_0053100	1.18222	4.15723	1.07848	3.62499	0	0	2.51073	0		0	0.057762	0.0670775	0.00974707	0	0	0.028881	0.0192061
PcyM_0053200	0.359465	0.156884	0.179975	0.125183	0	0.00327799	0.205377	0.00163899		0	0	0	0.351547	0.00493486	0	0	0.0891205
PcyM_0053300	0.235225	0.0973861	0.501922	0.766202	0	0	0.400184	0		0	0	0	0	0	0	0	0
PcyM_0053400	0.91993	0.999246	1.60768	3.37066	0	0.00315991	1.72438	0.00157995		0.123018	0	0	0	0	0	0.0615092	0
PcyM_0053500	0.496054	1.7228	6.08403	4.64678	0	0	3.23742	0		0.0858302	0	0.192054	0.478415	0	0	0.0429151	0.167617
PcyM_0053600	0.0722542	0.0405738	0.130972	0.13317	0.000522205	0	0.0942426	0.000261103		0.0875253	0.0593828	0.173194	0.0479357	0.174679	0.285588	0.0734541	0.170349
PcyM_0053700	0.273088	0.171605	0.14676	0.220912	0	0	0.203091	0		0	0	0.512258	0	0	0	0	0.128064
PcyM_0053800	0.0592322	0.201303	0.0865109	0.266751	0	0	0.153449	0		0.0270341	0.0054535	0.0115646	0.0115232	0.0397252	0	0.0162438	0.0157032
PcyM_0053900	0.33838	0.817297	0.720846	1.86356	0	0.00841122	0.935021	0.00420561		0.738809	0	0	0.902061	0	0	0.369405	0.225515
PcyM_0054000	1.90766	2.89085	0.694276	2.43813	0	0	1.98273	0		0	0	0.439756	0	0	0	0	0.109939
PcyM_0054100	0.563206	0.179182	0.118508	0.455618	0	0	0.329129	0		0	0.0155135	0.0692899	0	0	0	0.00775673	0.0173225
PcyM_0054200	1.92735	2.44627	1.49271	2.77911	0	0	2.16136	0		0.053857	0	0.198797	0	0	0	0.0269285	0.0496992
PcyM_0054300	0.383924	0.637847	0.182587	0.5552	0	0	0.439889	0		0	0	0	0	0	0	0	0
PcyM_0054400	0.101087	0.312853	0.039721	0.117258	0.00103297	0	0.14273	0.000516484		0	0	0.171249	0	0.24571	0.00164182	0	0.10465
PcyM_0054500	0.0582425	0.18801	0.0745556	0.208356	0	0	0.132291	0		0	0.0461593	0	0	0	0	0.0230797	0
PcyM_0054600	0.229151	0	0.0363567	0.14922	0	0	0.103682	0		0	0	0	0	0	0	0	0
PcyM_0054700	0.169767	0.144349	0.154849	1.14579	0	0	0.403688	0		7.76819	5.10371	5.02881	6.9793	4.52682	23.8283	6.43595	10.0908
PcyM_0054800	19.5571	3.83874	9.61535	0.230202	0.171698	0.307706	8.31035	0.239702		51.6747	35.8927	34.3924	40.8973	25.4958	102.755	43.7837	50.8852
PcyM_0054900	0.554033	0.795823	0.43218	1.21455	0.154004	0.124345	0.749147	0.139174		14.9652	13.9072	16.9221	14.9167	7.2502	24.3056	14.4362	15.8487
PcyM_0055000	0.191561	0.239188	0.045432	0.260567	0	0	0.184187	0		0.101971	0.215196	0.124951	0.374973	0.745389	0	0.158583	0.311328
PcyM_0055100	0.246495	0.186322	0.344631	0.449356	0	0	0.306701	0		0	0	0.38885	0.0276755	0	0	0	0.104131
PcyM_0055200	0.151119	1.57212	0.0657611	0.127663	0	0	0.479165	0		0.0774964	0.327092	0	0.283861	0	0	0.202294	0.0709654
PcyM_0055300	0.63712	2.25257	0.403901	1.03416	0	0	1.08194	0		0	0	0.881728	0	0	0	0	0.220432
PcyM_0055400	0.0552245	0.111123	0.151373	0.362427	0.00265763	0	0.170037	0.00132882		0.0815536	0	0.199865	0	0	0.368289	0.0407768	0.142038
PcyM_0055500	18.3687	0.448293	0.819276	1.28726	0	0	5.23088	0		0	0	0.0995905	0	0	0	0	0.0248976
PcyM_0055600	0.0568142	0.74813	0.104301	0.108179	0	0.0022366	0.254356	0.0011183		0	0.000933001	0.101846	0	0	0	0.0004665	0.0254615
PcyM_0055700	0.384515	0.367929	0.313939	0.32963	0	0	0.349004	0		0	0	0	0	0	0.00846825	0	0.00211706
PcyM_0055800	0.0389683	0.330507	0.0947026	0.208955	0	0	0.168283	0		18.0985	21.6276	25.4248	19.6012	18.7104	29.7515	19.863	23.372
PcyM_0055900	0.381009	0.749214	0.501526	0.984555	0	0	0.654076	0		10.9111	13.6947	15.9737	11.3588	8.13786	7.00205	12.3029	10.6181
PcyM_0056000	0.224122	0.397671	0.186061	0.34297	0	0	0.287706	0		0.283199	0	0.954304	0.345776	0	0.319725	0.141599	0.404951
PcyM_0056100	0.368155	0.346781	0.165214	0.933253	0	0	0.453351	0		0.255497	0	0.782688	0	0.00580224	0	0.127749	0.197123
PcyM_0056200	2.0819	1.06164	0.581611	0.964114	0	0	1.17232	0		0	0	0.0256688	0	0	0	0	0.00641721
PcyM_0056300	0.243888	0.342136	1.01666	1.11825	0	0	0.680233	0		0	0	0.0250059	0	0	0.0163193	0	0.0103313
PcyM_0056400	0.0905899	0.890567	0.548924	1.26783	0	0	0.699478	0		0	0	0	0.196627	0	0.0117299	0	0.0520892
PcyM_0056500	0.170429	0.337712	0.0659833	0.184163	0.0168808	0	0.189572	0.00844038		0	0	0	0.00744089	0.0221438	0	0	0.00739616
PcyM_0056600	4.49995	7.80177	1.13912	0.903688	0	0	3.58613	0		0.340989	0.179903	0.208917	0	0.309749	0	0.260446	0.129666
PcyM_0056700	1.25627	0.825605	0.286812	1.53158	0	0	0.975067	0		0	0	0	0	0	0	0	0
PcyM_0056800	3.70926	5.33158	4.64768	12.1058	0	0	6.44858	0		0	0	0	0	0	0	0	0
PcyM_0056900	0.468741	0.376098	0.879442	1.3109	0	0.00413498	0.758796	0.00206749		0	0	0	0	0	0	0	0
PcyM_0057000	2.09921	11.4761	3.19671	5.66309	0	0	5.60878	0		0	0	0	0	0	0.0236252	0	0.0059063
PcyM_0057100	0.29769	0.190091	0.331363	2.13773	0	0	0.739219	0		0.418377	0	0.512661	0	0	0	0.209188	0.128165
PcyM_0057200	0	0.034147	0.0237859	0.159618	0	0.014772	0.0543877	0.00738601		0.648758	0	1.58992	0	0	0	0.324379	0.39748
PcyM_0057300	0.0186204	0.449006	0.457146	1.19711	0	0	0.53047	0		0.0199325	0	0	0.00544	0.0161892	0	0.00996623	0.0054073
PcyM_0057400	0.392057	0.0402225	0.496493	1.6111	0.00142358	0	0.634969	0.000711788		0	0.276572	0.160588	0.106675	0.00198412	0	0.138286	0.0673117
PcyM_0057500	0.157183	0.0671138	0.205246	0.421405	0	0	0.212737	0		0.23524	0	0.0053951	0.822492	0	2.02807	0.11762	0.713989
PcyM_0057600	1.0425	1.22096	1.12455	2.27952	0.221446	0	1.41688	0.110723		0	0	0.0462601	0.32266	0	0	0	0.09223
PcyM_0057700	0.0485607	1.1236	0.0703731	0.082131	0	0	0.331166	0		0.0171196	0	0.189539	0.501658	0	0	0.00855978	0.172799
PcyM_0057800	0.325419	0.226882	0.320681	2.21271	0	0	0.771424	0		0.291726	0.153912	0.714936	0	0	0	0.222819	0.178734
PcyM_0057900	0.0430137	0.0801983	0.281539	0.0785031	0.00225298	0	0.120814	0.00112649		0.344145	0	0	0	0.00504219	0	0.172072	0.00126055
PcyM_0058000	0.388912	0.221271	0.327072	0.819733	0	0.00284192	0.439247	0.00142096		0	0	0.152939	0	0	0	0	0.0382347
PcyM_0058100	0.010808	0.0492372	0.0481188	0.0395971	0	0	0.0369403	0		0	0	0	0	0.0352692	0	0	0.00881731
PcyM_0058200	0.837847	0.527882	0.200249	1.01317	0	0	0.644788	0		0.166059	0	0.135654	0.067584	0	0	0.0830293	0.0508095
PcyM_0058300	1.27968	0.553517	0.766643	0.974708	0.00287947	0	0.893637	0.00143973		0	0	0.108274	0	0	0	0	0.0270685
PcyM_0058400	1.11726	4.0184	0.971943	2.89739	0	0	2.25125	0		0	0	0.447191	0	0	5.76825	0	1.55386
PcyM_0058500	0.0839188	0.152756	0.0842428	0.159096	0	0	0.120004	0		0.0395116	0	0	0	0	0	0.0197558	0
PcyM_0058600	1.86019	1.98652	0.335405	1.96626	0	0	1.53709	0		0	0.125324	0.546282	0.320191	0	0	0.0626621	0.216618
PcyM_0058700	0.389677	0.470581	0.253658	0.846657	0	0	0.490143	0		0.233402	0.0568343	0.124667	0.289847	0	1.74995	0.145118	0.541116
PcyM_0058800	1.6369	1.96699	1.07514	2.54736	0	0	1.8066	0		0.0246617	0	0	3.79399	0	0	0.0123308	0.948498
PcyM_0058900	0.122491	1.79917	0.900802	0.677967	0	0	0.875108	0		0	0	2.98562	0	0	0.0143271	0	0.749988
PcyM_0059000	0.702789	0.666922	0.206864	0.63739	0	0	0.553491	0		0	0	0	0.334785	0.0124538	0	0	0.0868098
PcyM_0059100	0.411521	0.775918	0.177282	0.742097	0.00185729	0	0.526705	0.000928644		0.398957	0.00200463	0.209513	0	0	0	0.200481	0.0523783
PcyM_0059200	0.218468	0.478105	0.210055	0.340349	0	0	0.311744	0		0.00953446	0	0.105148	0.209543	0.00890842	0	0.00476723	0.0808998
PcyM_0059300	0.373225	0.386615	0.144744	0.596596	0	0	0.375295	0		0.30224	0.166679	0.405429	0.516497	0.000728379	0.367535	0.23446	0.322547
PcyM_0059400	0.246746	0.0990906	0.0253476	0.130194	0	0	0.125345	0		0.230122	0.193424	0.226588	0.421874	0	0.463463	0.211773	0.277981
PcyM_0059500	13.2498	18.6772	2.8473	14.2108	0	0	12.2463	0		0.520042	0.0634789	0.87231	1.39069	1.18363	1.82927	0.29176	1.31897
PcyM_0059600	0.00876071	0.023402	0.00909942	0.0334697	0.0199635	0	0.018683	0.00998175		1.10678	0.96855	3.16299	3.50237	4.6619	6.11051	1.03767	4.35945
PcyM_0059700	0.0497405	0.158791	0.0872486	0.283261	0	0	0.14476	0		0.0206969	0.0545	0.0851112	0.0848061	0.0092325	0	0.0375985	0.0447874
PcyM_0059800	2.33403	0.343517	0.827001	2.28169	0	0	1.44656	0		0.0111099	0	0.0285886	0.0949537	0.0105967	0	0.00555496	0.0335348
PcyM_0059900	0.519858	1.38092	6.7312	5.18476	0	0	3.45418	0		0	0	0.571704	0	0	0	0	0.142926
PcyM_0060000	0.0946043	0.10416	0.180958	0.341464	0	0	0.180296	0		0	0	0.00939252	0	0	0	0	0.00234813
PcyM_0060100	0.354733	0.545049	0.155339	0.127857	0	0.00317759	0.295744	0.00158879		0	0.00566364	0	0	0	0.0121195	0.00283182	0.00302987
PcyM_0060200	0.363254	0.17002	0.062701	0.096784	0.204824	0.0537184	0.17319	0.129271		0.0540068	0.0832742	0.0499118	0.0379657	0.146681	0.474779	0.0686405	0.177334
PcyM_0060300	1.15371	1.00563	0.166888	0.30354	0.0488501	0.0662838	0.657442	0.0575669		0.0678835	0.14543	0.0788604	0.0943138	0.161769	0.386181	0.106657	0.180281
PcyM_0060400	0.353148	1.12787	0.465236	0.572338	1.90433	0.0282162	0.629648	0.966276		0.0884595	0.0421141	0.0341807	0.0425529	0.140161	0.499845	0.0652868	0.179185
PcyM_0060500	0.57833	0.784555	1.24257	3.28264	0	0	1.47202	0		0	0	0	0.0306603	0	0	0	0.00766506
PcyM_0060600	0.208661	0.0630991	0.0333234	0.0802243	4.28105	0.0265669	0.0963271	2.15381		0.13711	0.0348889	0.00839647	0.0714051	0.0208725	0.245861	0.0859993	0.0866339
PcyM_0060700	0.885995	1.05443	0.295646	0.987578	0	0	0.805911	0		0	0.0427844	0.00368033	0	0	0	0.0213922	0.000920082
PcyM_0060800	0.0538568	0.224849	0.0789677	0.170434	0	0	0.132027	0		0.0191522	0.0504324	0.0787589	0.0784766	0.00854343	0	0.0347923	0.0414447
PcyM_0060900	0.880743	0.0968142	0.310863	0.85385	0	0	0.535568	0		0.0127071	0	0.0280274	0.0930898	0.0103887	0	0.00635357	0.0328765
PcyM_0061000	0.238093	0.540117	0.217564	0.399117	0	0	0.348722	0		0	0	0.189247	0.188568	0	0	0	0.0944538
PcyM_0061100	0.547373	1.10432	0.228612	1.00644	0	0	0.721688	0		0.0251629	0.018586	0.0190442	0	0	0	0.0218744	0.00476105
PcyM_0061200	0.0413146	0.205322	0.127574	0.289718	0	0.0147053	0.165982	0.00735263		0.0147694	0.0524205	0.173258	0.0606563	0.0584005	0.0725826	0.033595	0.0912244
PcyM_0061300	0.266984	1.92612	0.322087	0.447658	0	0	0.740713	0		0	0	0	0.235607	0.0100165	0.0181547	0	0.0659445
PcyM_0061400	2.83881	4.51704	9.73308	13.2572	0	0	7.58653	0		0	0	0.0332053	0	0	0	0	0.00830132
PcyM_0061500	0.188166	0.470543	0.166345	0.714635	0	0	0.384922	0		0.133768	0.002823	0	0	0	0	0.0682954	0
PcyM_0061600	0.441005	0.137666	0.109042	0.37201	0	0	0.264931	0		0	0.0115498	0	0	0	0	0.00577492	0
PcyM_0061700	0.0286828	0.195442	0.106863	0.236335	0	0	0.141831	0		0	0	0	0	0	0	0	0
PcyM_0061800	0.0293695	0.200121	0.129896	0.252649	0	0	0.153009	0		0	0	0	0	0	0	0	0
PcyM_0061900	0.298041	1.16743	0.194834	0.660234	0	0	0.580134	0		0.270878	0.357283	0	0.578782	1.47637	0	0.31408	0.513788
PcyM_0062000	0.544741	0.72844	0.112665	0.322728	0.00093461	0	0.427144	0.000467305		0.0611839	0.193681	0.299889	0	0.555785	0.00148549	0.127432	0.21429
PcyM_0062100	0.81551	1.28408	0.441698	1.24052	0	0	0.945451	0		0	0	0.00476135	0.161306	0.00727331	0.00451979	0	0.044465
PcyM_0062200	0.0452101	0.153648	0.102972	0.215029	0	0	0.129215	0		0.172096	0.00208176	0.309018	0.307911	0.0151643	0	0.087089	0.158023
PcyM_0062300	0.433073	0.930761	0.471623	3.32132	0	0	1.2892	0		0	0	0	0	0	0	0	0
PcyM_0062400	0.372145	0.614664	0.164565	0.549093	0	0	0.425117	0		0.141846	0	0	0.692758	0.00780916	0.00485278	0.0709232	0.176355
PcyM_0062500	0.518991	1.78023	0.876307	1.64886	0	0	1.2061	0		0.373196	0	0.228649	0.45566	0	3.37065	0.186598	1.01374
PcyM_0062600	1.51217	1.42497	0.932949	2.05942	0	0	1.48238	0		0	0	0	0	0	0	0	0
PcyM_0062700	1.03394	58.5794	1.2294	0.965922	0	0	15.4522	0		0.690588	0.388639	0.112829	0.0562123	0	1.24746	0.539614	0.354124
PcyM_0062800	0.150529	0.186309	0.183556	0.37044	0	0	0.222709	0		0	0.0632672	0.589205	0	0	0	0.0316336	0.147301
PcyM_0062900	0.405216	0.0683481	8.59873	73.2861	0	0.151088	20.5896	0.0755438		24.0026	11.1757	13.6348	13.2587	28.0977	31.694	17.5891	21.6713
PcyM_0063000	0.225296	1.27634	0.459911	0.494898	0	0.000859528	0.614113	0.000429764		0.133573	0.246652	0.443905	0.557216	0.111224	1.08074	0.190112	0.548271
PcyM_0063100	0.28438	0.221019	0.198827	0.395196	0	0	0.274855	0		0.251073	0.778778	0.194719	0.432023	0.364913	0	0.514925	0.247914
PcyM_0063200	1.58207	0.672767	0.509123	1.09652	0	0	0.96512	0		0.480365	0.0586072	0.0337229	1.78396	0.036363	0	0.269486	0.463512
PcyM_0063300	1.44874	11.2774	0.353769	1.39106	0	0	3.61775	0		11.6528	8.89489	10.3294	11.0996	16.516	31.7232	10.2739	17.4171
PcyM_0063400	0.386576	1.38087	0.522661	0.962123	0	0.120158	0.813057	0.0600791		10.5558	6.6057	10.8537	11.7092	12.7043	16.2406	8.58075	12.877
PcyM_0063500	0.857815	0.349048	0.259414	0.652471	0.326048	0	0.529687	0.163024		14.0074	11.7305	17.2374	15.4737	12.7241	28.1139	12.8689	18.3873
PcyM_0063600	0.317154	0.769152	0.422429	0.552345	0	0	0.51527	0		0.0930835	0	0	0.113652	0.0552864	0	0.0465417	0.0422345
PcyM_0063700	0.120157	0.222971	0.377772	0.553605	0	0	0.318626	0		0.12079	0	0.444033	0.294961	1.09724	0	0.060395	0.459058
PcyM_0063800	0.115015	0.89555	0.625575	0.519588	0	0.00276125	0.538932	0.00138062		0.363806	0	0	0.59226	0	0	0.181903	0.148065
PcyM_0063900	0.0166557	0.396158	0.403939	1.10777	0	0	0.481132	0		0.0206252	0	0	0.00562907	0.0167519	0	0.0103126	0.00559523
PcyM_0064000	1.28394	1.6183	1.41384	4.22969	0	0	2.13644	0		0	0	0	0.493781	0	0	0	0.123445
PcyM_0064100	0	3.6143	0.0748026	0.228618	0	0	0.979431	0		0	0	0.034659	0	0	0	0	0.00866475
PcyM_0064200	0.370411	0.557969	1.18506	2.05966	0	0	1.04327	0		0	0	0	0	0.886621	0.0459138	0	0.233134
PcyM_0064300	0.172817	0.231564	0.0605666	0.255227	0	0	0.180044	0		0.288986	0	0	0.0811766	0.00823562	0	0.144493	0.0223531
PcyM_0064400	0.778315	4.33985	1.50939	1.71299	0	0.00266435	2.08514	0.00133217		0.207023	0	0	0	0	0	0.103512	0
PcyM_0064500	0.98056	1.91189	0.356556	0.822403	0	0	1.01785	0		0	0	0	0	0	0	0	0
PcyM_0064600	0.702238	0.43138	1.96246	3.09564	0	0	1.54793	0		1.00953	0.39894	0.617704	1.8483	0	1.99527	0.704234	1.11532
PcyM_0064700	0.0479954	0.0467543	0.0264324	0.0434742	0	0	0.0411641	0		0.0105298	0	0.0903197	0.179992	0	0	0.00526492	0.0675779
PcyM_0064800	0.0354577	0.0711812	0.0989188	0.112237	0	0	0.0794487	0		0	0	0.235925	0.23508	0	0	0	0.117751
PcyM_0064900	0.776047	1.47482	0.696247	2.04408	0	0	1.2478	0		0	0	0	0	0	3.31981	0	0.829952
PcyM_0065000	0.366338	0.236326	0.276791	0.612914	0	0.00189798	0.373092	0.000948989		0.166711	0.0879555	0	0.306466	0.454314	0	0.127333	0.190195
PcyM_0065100	0.34624	0.556617	0.163446	0.547354	0	0	0.403414	0		0	0	0.231343	0	0.0207879	0.012918	0	0.0662623
PcyM_0065200	0.238938	0.305827	0.100332	0.147876	0.0126105	0.00357957	0.198243	0.00809504		0	0.00638013	0	0	0	0.0136526	0.00319006	0.00341316
PcyM_0065300	0.0221341	0.489441	0.571487	1.54327	0	0	0.656583	0		0.0206957	0	0	0.00564832	0.0168091	0	0.0103479	0.00561437
PcyM_0065400	0	0.191776	0.2013	1.39855	0	0	0.447908	0		0	0	0	0.0256661	0.0466774	0	0	0.0180859
PcyM_0065500	0.931489	1.81245	0.0556918	1.23464	0	0	1.00857	0		0	0	0	0	0	0	0	0
PcyM_0065600	1.32096	0.387415	0.400633	1.50098	0	0	0.902497	0		0	0	0.00851886	0.0066908	0.0199115	0	0	0.0087803
PcyM_0065700	1.14329	1.46614	0.766909	1.03383	0	0	1.10254	0		0	0	0	0	0	0	0	0
PcyM_0065800	2.87005	1.55783	1.1506	1.7163	0	0	1.8237	0		0	0	0	0	0.0180264	0.011202	0	0.00730709
PcyM_0065900	0.0281966	0.054993	0.0426383	0.161356	0	0	0.071796	0		0	0	0	0	0	0	0	0
PcyM_0066000	0.31658	0.536677	0.118055	0.213495	0	0.00406763	0.296202	0.00203382		0	0.0228696	0.254472	0.00660959	0.162276	3.76476	0.0114348	1.04703
PcyM_0066100	0	0.0566715	0.0399958	0.0657246	0	0	0.040598	0		0	2.50175	0	1.4474	6.50596	0	1.25087	1.98834
PcyM_0066200	0.0127377	0.0691847	0.0560562	0.154173	0	0	0.0730378	0		0.052306	0.166427	0.128187	0.258816	0	0	0.109366	0.0967509
PcyM_0066300	0.24553	0.644579	0.250075	0.373446	0	0	0.378407	0		0.112208	0.2368	0	0.068501	0.512552	0	0.174504	0.145263
PcyM_0066400	0.137497	0.115001	0.175152	0.539262	0	0	0.241728	0		0.101988	0	0.00245043	0.498096	0.555867	0	0.0509941	0.264103
PcyM_0066500	0.107555	0.244781	0.210178	0.44853	0	0	0.252761	0		0.213435	0.000643466	0.18681	0.168481	0	0	0.107039	0.0888227
PcyM_0066600	0.705199	3.92092	1.35678	1.59565	0	0.000789702	1.89464	0.000394851		0.0818144	0	0.150378	0	0	0	0.0409072	0.0375944
PcyM_0066700	0.475633	1.34418	0.211113	0.568649	0.00238933	0	0.649893	0.00119467		0	0	0.383333	0.19098	0.568347	0.0185136	0	0.290293
PcyM_0066800	0.63201	1.22833	0.220854	0.516278	0	0	0.649369	0		0	0.0532297	0.0529836	0.0615927	0	0	0.0266149	0.0286441
PcyM_0066900	1.3182	1.17143	0.539143	1.07823	0	0	1.02675	0		3.23983	3.66998	4.68645	9.83112	10.993	21.5452	3.4549	11.7639
PcyM_0067000	0.101791	0.185652	0.148576	1.04693	0	0	0.370736	0		0.257389	0.318826	0.106476	0.49189	0.457451	0.227416	0.288108	0.320808
PcyM_0067100	0.556048	0.0431515	0.0396864	0.0535487	0	0.0021466	0.173109	0.0010733		0	0	0	0.230212	1.37734	0	0	0.401887
PcyM_0067200	0.102206	0.510305	0.621152	1.21966	0	0.0303936	0.61333	0.0151968		0	0	0.00457523	0	1.43017	0	0	0.358687
PcyM_0067300	0.189567	0.261355	0.0973718	0.286196	0	0	0.208622	0		0	0	0.0233756	0.00931674	0.0277262	0	0	0.0151046
PcyM_0067400	0.483645	0.549189	0.877171	1.50692	0	0.0023213	0.854231	0.00116065		0.580315	0	0.711093	0	0	0	0.290157	0.177773
PcyM_0067500	0.010564	0.13655	0.0892821	0.0724554	0	0	0.077213	0		0	0	0	0	0	0	0	0
PcyM_0067600	0.338402	0.616891	0.134002	0.291222	0	0.000681014	0.345129	0.000340507		0	0.156583	0	0.449448	0	0.00259742	0.0782914	0.113011
PcyM_0067700	0.111742	0.197341	0.144553	0.971867	0	0	0.356376	0		0	0	0.840313	0.55347	0	0	0	0.348446
PcyM_0067800	0.664855	0.715484	0.226061	1.21363	0	0	0.705008	0		0.157661	0.166361	0	0.769994	0	0	0.162011	0.192498
PcyM_0067900	0.0542582	0.0665161	0.0183447	0.0910596	0	0	0.0575447	0		0.235583	0.0128238	0.200866	0.140395	0.147196	0.704525	0.124203	0.298246
PcyM_0068000	16.6498	21.9539	3.38727	16.6204	0	0	14.6528	0		0.598353	1.23102	0.77689	0.301572	3.92588	3.83323	0.914687	2.20939
PcyM_0068100	0.235021	0.138915	0.212886	0.178036	0	0	0.191215	0		0.967981	0.340466	1.35557	1.85723	0.837428	7.07846	0.654224	2.78217
PcyM_0068200	0.109881	0.157633	0.0658477	0.225644	0	0.00482712	0.139752	0.00241356		0.476995	0	0.43441	0.167425	0.818446	0.339066	0.238497	0.439837
PcyM_0068300	0.0527301	0.20451	0.0801545	0.297717	0	0	0.158778	0		0.00548217	0.0017905	0.0911259	0.351847	0.0130426	0	0.00363633	0.114004
PcyM_0068400	0.198966	0.0350639	0.178638	0.88377	0	0	0.324109	0		0	0	0	0.509621	0	0	0	0.127405
PcyM_0068500	0.0682305	0.0286099	0.101041	0.255324	0	0	0.113301	0		0	0	0	0	0	0	0	0
PcyM_0068600	0.418083	0.302651	0.327411	0.846552	0.0195983	0.00349057	0.473674	0.0115444		0	0.634593	0	1.22382	0.00827738	0	0.317297	0.308025
PcyM_0068700	0.785366	0.864365	0.299143	0.77368	0.010331	0	0.680638	0.00516549		0	0	0	0.147287	0	0	0	0.0368218
PcyM_0068800	0.00783657	0.440782	0.306185	0.936442	0	0	0.422811	0		0.0957444	0.151542	0.117321	0.175351	0.60881	0	0.123643	0.22537
PcyM_0068900	0.218568	6.07975	0.933189	1.8604	0	0	2.27298	0		0	0	0.0085952	0	0	0	0	0.0021488
PcyM_0069000	0.195466	0.498667	0.807074	1.57662	0	0.0379474	0.769456	0.0189737		0	0	0.0392722	1.01742	0.0182397	0	0	0.268732
PcyM_0069100	0.196363	0.283468	0.15879	0.556124	0	0.000133855	0.298686	6.69274e-05		0.17445	0.214005	0.248924	0.17668	0.262896	0.0985319	0.194228	0.196758
PcyM_0069200	1.00214	3.73046	1.10498	1.75646	0.0345369	0	1.89851	0.0172685		0.0441592	0	0	0.0155904	0.481362	0.0385972	0.0220796	0.133887
PcyM_0069300	3.08394	7.08803	1.57835	5.52166	0.00176266	0	4.318	0.000881331		0	0.0621483	0.217737	0.0719125	0.642025	0.398968	0.0310742	0.332661
PcyM_0069400	0.366301	0.179838	0.103991	0.298712	0	0	0.23721	0		0	0.01223	0	0.0168469	0	0	0.00611499	0.00421174
PcyM_0069500	0.212168	1.25576	0.400893	1.56565	0	0	0.858618	0		0	0	0.146784	0	0	0	0	0.0366961
PcyM_0069600	0.174579	0.345344	0.090907	0.647611	0	0	0.31461	0		0.0447067	0.0641564	0.115824	0.0525232	0	0.06922	0.0544315	0.0593918
PcyM_0069700	0.115403	0.387612	0.207905	0.3809	0	0	0.272955	0		0	0	0	0	0	0	0	0
PcyM_0069800	0.0109963	0.0241618	0.0124826	0.0199577	0	0	0.0168996	0		0.0567593	0.0793369	0.0139101	0.144526	0	0.512641	0.0680481	0.167769
PcyM_0069900	0.486952	0.833159	0.653358	1.90499	0	0	0.969616	0		0	0	0	0	0	0	0	0
PcyM_0070000	0.477934	0.554276	0.639665	2.71026	0.0115422	0	1.09553	0.00577112		0	0	0.434011	0	0	0	0	0.108503
PcyM_0070100	0.0885331	0.219645	0.131518	0.285571	0	0	0.181317	0		0.00901602	0.126621	0.00624444	0.435544	0.02145	0	0.0678185	0.11581
PcyM_0070200	0.405887	1.45111	0.316497	0.5251	0	0.00312687	0.674649	0.00156344		0	0	0	0	0	0	0	0
PcyM_0070300	0.144269	1.02645	0.467491	1.45162	0	0	0.772459	0		0	0	0	0.308941	0	0	0	0.0772353
PcyM_0070400	0.129512	1.08094	0.697283	0.864185	0	0	0.69298	0		0	0	0	0	0.0415314	0	0	0.0103828
PcyM_0070500	0	0.404954	0.0706934	0.0661787	0	0	0.135456	0		0.144255	0.153099	0.160694	0.0480354	0	0	0.148677	0.0521824
PcyM_0070600	0.105161	0.285815	0.0435825	0.139449	0	0	0.143502	0		0	0	0	0.00912535	0.0271566	0	0	0.0090705
PcyM_0070700	0.437548	0.371323	0.75769	1.24209	0	0.0034865	0.702163	0.00174325		0	0	0	0.532101	0	0.0410011	0	0.143276
PcyM_0070800	0.167043	2.69411	0.108943	0.116094	0	0	0.771548	0		0	0	0	0	0	0	0	0
PcyM_0070900	0.0573016	0.132146	0.0743562	0.191928	0.00608001	0	0.113933	0.00304		0.0143519	0.00468739	0.247354	0.0099044	0.0341446	2.94894	0.00951964	0.810086
PcyM_0071000	0.0694507	0.057841	0.113331	0.271271	0	0	0.127973	0		0	0	0.0350146	0	0	0	0	0.00875365
PcyM_0071100	1.15217	0.873986	0.570624	0.543078	0	0.00464851	0.784965	0.00232426		0.0680512	0	0	0	0	0	0.0340256	0
PcyM_0071200	0	0.0170797	0.229531	0.0272525	0	0	0.0684659	0		0	0	0	0	0.00856429	0.0177401	0	0.0065761
PcyM_0071300	0.494826	1.31285	6.46199	5.03056	0.0170587	0	3.32506	0.00852934		0	0	0.0246708	0	0	0	0	0.0061677
PcyM_0071400	0.199178	0.362624	1.31612	0.308605	0.00636381	0	0.546631	0.00318191		0	0	0.297786	0	0.0142423	0	0	0.078007
PcyM_0071500	0.0572234	1.6835	0.0640292	0.200121	0	0	0.501218	0		0.0214279	0.00547025	0	0	0	0	0.0134491	0
PcyM_0071600	0.113637	0.255244	0.109995	0.14767	0	0	0.156636	0		0.174138	0	0.640144	0	0.0090391	0	0.087069	0.162296
PcyM_0071700	0.053433	0.272777	0.152436	0.390793	0	0	0.21736	0		0	0	0.389223	0	0	0	0	0.0973058
PcyM_0071800	2.09656	3.08021	0.21536	1.36658	0	0	1.68968	0		0	0	0	0	0	0	0	0
PcyM_0071900	1.15587	1.01763	1.14521	3.11738	0.00743484	0.0051949	1.60902	0.00631487		0	0	0.021505	0	0	0	0	0.00537625
PcyM_0072000	0.0522518	0.346291	0.1988	0.219667	0	0	0.204252	0		0	0.000589558	0.128712	0	0	0	0.000294779	0.032178
PcyM_0072100	0.0788254	0.757093	0.358582	1.50151	0	0	0.674002	0		0	0	0	0	0	0	0	0
PcyM_0072200	0.652815	0.175367	0.989398	0.175209	0	0	0.498197	0		0.228214	0.176331	0.186383	0.333875	0.000520753	0.102907	0.202272	0.155921
PcyM_0072300	0.702438	2.40094	0.947089	1.34219	0	0	1.34816	0		0.322097	0	0	0	0.00705031	0	0.161048	0.00176258
PcyM_0072400	0.305733	0.523869	0.145316	0.4693	0	0	0.361054	0		0.119026	0.094196	0.182312	0.18259	0	0.201567	0.106611	0.141617
PcyM_0072500	0.120483	1.5445	0.323714	1.05473	0	0	0.760856	0		0.463424	0	0.578781	0	0	3.13918	0.231712	0.92949
PcyM_0072600	0.0439411	0.388785	0.0520959	0.243139	0	0	0.18199	0		0.269539	0	0.224422	0	0.00307981	1.62295	0.134769	0.462614
PcyM_0072700	0.0238024	0.326548	0.256595	0.384058	0.00643388	0	0.247751	0.00321694		0.197434	0	0	0.00270854	0	0	0.0987168	0.000677134
PcyM_0072800	0.493378	0.207328	0.774869	0.518231	0	0	0.498451	0		0.332455	0	0.141015	0.541221	0	0	0.166227	0.170559
PcyM_0072900	0.260364	0.590437	0.334751	0.698294	0	0	0.470961	0		0.220079	0.00247046	0.829769	0.268708	0	0	0.111274	0.274619
PcyM_0073000	0.487737	0.25	0.228635	1.4175	0	0.0174142	0.595968	0.00870709		0	0	0	0	0.0771923	15.5419	0	3.90478
PcyM_0073100	0.934703	5.11895	10.1889	13.8087	0	0	7.51282	0		0	0	0	0	0	0	0	0
PcyM_0073200	0.536947	1.49803	6.65756	5.06848	0	0	3.44025	0		0.377366	0	0	0	0	0	0.188683	0
PcyM_0073300	0.490938	0.468284	0.369535	1.57784	0	0	0.726648	0		0.492906	0.129504	0	0.152435	0	0	0.311205	0.0381087
PcyM_0073400	0.0842904	0.620139	0.186137	0.807484	0	0	0.424512	0		0	0.00638049	0.74095	0	0	0	0.00319025	0.185237
PcyM_0073500	1.00112	1.21169	1.11562	2.28048	0	0	1.40223	0		0	0	0.663554	0	0	0	0	0.165888
PcyM_0073600	0.615661	0.790713	0.589098	1.72382	0	0	0.929823	0		0.16889	0	0.00795963	0.00429601	0	0	0.0844449	0.00306391
PcyM_0073700	1.26076	2.33493	1.07634	4.70746	0	0	2.34487	0		0	0.00835674	0	0	0	0	0.00417837	0
PcyM_0073800	0.137153	0.184968	0.100296	0.326872	0	0	0.187322	0		0.168309	0	0	0.10275	0	0	0.0841546	0.0256875
PcyM_0073900	0.220729	0.781101	0.235217	1.16495	0.0144441	0	0.6005	0.00722205		0	0	1.09546	0	0	0	0	0.273865
PcyM_0074000	2.28001	65.2661	3.51109	6.10093	0	0.00200579	19.2895	0.0010029		0	0	0	0	0.8002	0	0	0.20005
PcyM_0074100	0.0964548	0.280346	0.137409	0.286535	0	0	0.200186	0		0.0515905	0.0168497	0.0599023	0.0356031	0.122739	0	0.0342201	0.0545611
PcyM_0074200	0.20006	0.260843	0.283739	0.399639	0	0	0.28607	0		0	0	0	0.00729329	0.0217045	1.19422	0	0.305804
PcyM_0074300	0.52207	1.34645	6.77715	5.19091	0	0	3.45914	0		0	0	0.0219826	0	0	0	0	0.00549564
PcyM_0074400	0.125828	0.047729	0.0758886	0.402826	0.0358905	0	0.163068	0.0179452		0	0	0	0	0.111162	0	0	0.0277904
PcyM_0074500	0.216308	0.0924241	0.383483	0.802702	0	0	0.373729	0		0	0	0	0	0	0	0	0
PcyM_0074600	0.0268065	0.598718	0.163071	0.434749	0	0	0.305836	0		0.0796143	0.00168016	0	0	0	0	0.0406472	0
PcyM_0074700	0.0138336	0.117604	0.151622	0.206618	0	0.00339181	0.122419	0.0016959		0.0420148	0	0	0	0	0	0.0210074	0
PcyM_0074800	0.287109	2.17	0.42289	0.795102	0	0	0.918776	0		0	0	0	0.249912	0.00701629	0	0	0.0642321
PcyM_0074900	0.9938	1.85255	2.35067	3.58125	0	0	2.19457	0		0.138115	0	0	0	0.00865252	0	0.0690575	0.00216313
PcyM_0075000	0.19344	0.201145	0.67092	0.513465	0	0	0.394742	0		0	0	0	0	0	0.0076601	0	0.00191503
PcyM_0075100	0.0794915	0.236401	0.100734	0.279704	0	0	0.174083	0		0.0406175	0.0132659	0.0281314	0.0280306	0.0966332	0	0.0269417	0.0381988
PcyM_0075200	0.302526	0.130874	0.120383	0.382006	0	0	0.233947	0		0	0.0144237	0.0246322	0.0198689	0	0	0.00721187	0.0111253
PcyM_0075300	0.110684	0.340904	0.043908	0.158736	0.00457869	0	0.163558	0.00228934		0	0	0.0244861	0	0	0.00727748	0	0.00794089
PcyM_0075400	0.0521044	0.212601	0.0998722	0.154581	0.0247966	0	0.12979	0.0123983		0	0.0501821	0	0	0	0	0.0250911	0
PcyM_0075500	1.06314	1.5731	0.744037	1.0979	0	0	1.11954	0		0	0	0	0	0	0	0	0
PcyM_0075600	1.73757	2.18109	1.7789	1.76666	0	0	1.86605	0		0	0	0	0	0	0	0	0
PcyM_0075700	0	0.182811	0.0983132	0.0598148	0	0	0.0852348	0		0	0	0	0.275205	0	0	0	0.0688012
PcyM_0075800	0.0313682	0.115614	0.0586765	0.143949	0	0	0.0874021	0		0	0	0	0	0	0	0	0
PcyM_0075900	0.882118	1.38434	0.413064	1.40838	0	0	1.02197	0		0	0	0	0	0.0178596	0.0110984	0	0.0072395
PcyM_0076000	0.939227	7.11381	0.217637	0.469826	0.00161848	0	2.18513	0.000809239		0.211906	0.1118	0	0	0	0.00257245	0.161853	0.000643112
PcyM_0076100	0.235442	1.39873	0.319568	0.293103	0	0.0017462	0.561712	0.000873098		0	0	0	0.050419	0.304377	0	0	0.0886989
PcyM_0076200	0.0668146	0.0375192	0.145286	0.124513	0	0	0.0935332	0		0.109284	0.0487698	0.171544	0.119911	0.286435	0.633053	0.0790268	0.302736
PcyM_0076300	0.0973159	0.0982342	0.0324019	0.0783842	0	0	0.0765841	0		0.418355	0.223058	0.764558	1.2797	0.19672	1.67771	0.320707	0.979671
PcyM_0076400	0.198462	0.0782895	0.0630066	0.441224	0	0	0.195246	0		0.65688	0.314051	0.36604	0.83794	0.234153	0.52438	0.485466	0.490628
PcyM_0076500	0.010395	0.0261143	0.0102575	0.046114	0.121079	0	0.0232202	0.0605395		2.58942	2.53327	4.34769	5.26809	6.6644	3.56874	2.56134	4.96223
PcyM_0076600	0.205863	0.257475	0.162633	0.266076	0	0	0.223012	0		0	0.00823489	0.239442	0.357875	1.07347	0	0.00411744	0.417698
PcyM_0076700	0.907311	0.173133	0.130931	0.150281	0	0	0.340414	0		0.0471436	0.0179083	0	0	0	0	0.032526	0
PcyM_0076800	0.0156071	0.0507203	0.0774303	0.195664	0	0	0.0848554	0		0	0	0.0455818	0	0	0.0454964	0	0.0227695
PcyM_0076900	0.120894	0.371705	0.267488	0.433023	0	0	0.298277	0		0	0	0	0.791342	0	0	0	0.197836
PcyM_0077000	0.46879	0.41975	0.251051	0.336325	0	0	0.368979	0		0	0	0.750827	0.561102	0	0	0	0.327982
PcyM_0077100	0.0740611	0.137536	0.172288	0.209458	0.00869163	0	0.148336	0.00434581		0	0	0	0.325651	0	0	0	0.0814128
PcyM_0077200	0.120174	1.74551	0.559278	0.402492	0	0	0.706864	0		0	0	0	0	0	0	0	0
PcyM_0077300	0.441641	2.43772	0.825224	0.975714	0	0.000565616	1.17008	0.000282808		0.043949	0.0463743	0.0538533	0	0	0	0.0451617	0.0134633
PcyM_0077400	0.872227	4.94133	1.74406	1.94371	0	0.00985292	2.37533	0.00492646		0.765584	0	0	10.2823	0	0	0.382792	2.57057
PcyM_0077500	3.82315	2.10252	1.77796	5.82657	0	0.00473522	3.38255	0.00236761		0	0	0	0	0	0	0	0
PcyM_0077600	0.0238195	0.211165	0.0862117	0.110791	0	0.0172833	0.107997	0.00864165		0	0	0.0605395	0	0	0	0	0.0151349
PcyM_0077700	0.616884	0.73281	0.276832	0.260104	0	0	0.471658	0		0	0	0	0.330382	0	0	0	0.0825955
PcyM_0077800	0.470217	1.80107	0.448875	1.66492	0.00861947	0	1.09627	0.00430973		0	0	0	0	0	0	0	0
PcyM_0077900	0.247228	0.469273	0.233454	0.3842	0	0	0.333539	0		0	0	0.0431514	0	0	0	0	0.0107879
PcyM_0078000	2.85737	5.45089	2.95758	11.9149	0	0	5.79519	0		0	0	0	0	0	0	0	0
PcyM_0078100	0.174896	0.159219	0.28756	0.60036	0	0	0.305509	0		0	0.00464647	0	0	0	0	0.00232323	0
PcyM_0078200	0.586681	0.221005	0.143537	0.505243	0	0	0.364116	0		0	0.0173651	0	0	0	0	0.00868257	0
PcyM_0078300	0.0491532	0.053033	0.0740042	0.178337	0	0	0.0886317	0		0.00975796	0.00197166	0	0	0	0	0.00586481	0
PcyM_0078400	0.331927	0.421977	0.356246	0.744479	0	0	0.463658	0		0.0285797	0	0	3.76865	0	0	0.0142899	0.942161
PcyM_0078500	0.516194	1.29785	6.41427	4.95311	0	0	3.29536	0		0	0	0.977991	0.974485	0	0	0	0.488119
PcyM_0078600	0.175554	0.548438	0.788282	2.2095	0	0	0.930444	0		0	0	0	0	0.0128914	0	0	0.00322285
PcyM_0078700	0.0801256	0.0259909	0.0111169	0.0386977	0	0	0.0389828	0		8.27524	9.60509	25.9689	20.8845	27.9636	29.8962	8.94017	26.1783
PcyM_0078800	0.0472717	0.0255781	0.0237477	0.0165377	0	0	0.0282838	0		0.315944	0.614543	0.447782	0.65997	0.435685	1.34083	0.465244	0.721066
PcyM_0078900	0.759463	1.84015	0.536061	1.40476	0	0	1.13511	0		0	0.00298454	0.0816833	0.0794293	0	0	0.00149227	0.0402781
PcyM_0079000	195.757	1003.21	252.532	325.179	0.252727	0	444.169	0.126364		0.560108	0.31824	0.686332	0.420844	0	0.389138	0.439174	0.374079
PcyM_0079100	2.7247	3.16132	1.47593	3.00418	0.00475574	0	2.59153	0.00237787		0.277815	0.293146	0.170212	0.0848007	0	0	0.285481	0.0637531
PcyM_0079200	0.0894858	0.311192	0.264202	0.425691	0	0	0.272643	0		0	0.00208216	0	0.725876	0	0	0.00104108	0.181469
PcyM_0079300	0.462702	0.624141	0.207704	0.17202	0	0	0.366642	0		0	0	0	0.137432	0.204496	0	0	0.085482
PcyM_0079400	0.07812	2.72795	0.232253	0.669497	0	0	0.926954	0		0.0188037	1.88493	0.0230413	1.74486	0.0118014	4.84021	0.951867	1.65498
PcyM_0079500	0.198215	0.295627	0.328594	0.474862	0	0	0.324324	0		0	0	0.497935	0	0	0	0	0.124484
PcyM_0079600	0.186432	2.29893	0.310714	0.583425	0	0	0.844874	0		0	0	0.208033	0.207288	0	0	0	0.10383
PcyM_0079700	0.261862	0.510631	0.391368	0.508675	0	0	0.418134	0		0	0	0.0319724	0.00926312	0	0	0	0.0103089
PcyM_0079800	0.231682	0.348461	0.194146	0.214716	0	0	0.247251	0		0.115678	0.0317361	0.0708736	0	0	0	0.0737072	0.0177184
PcyM_0079900	0.0432004	0.0191518	0.0362006	0.0954314	0	0	0.048496	0		0.0484325	0.0851753	0.199345	0.0788458	0.0293302	0	0.0668039	0.0768804
PcyM_0080000	0.0464044	0.16973	0.0229361	0.0784532	0	0	0.0793809	0		0	0	0.116581	0.175734	0	0	0	0.0730787
PcyM_0080100	0.0600349	0.171737	0.132968	0.346086	0	0	0.177706	0		0	0	0	0.0108948	0	0	0	0.00272369
PcyM_0080200	0.399325	0.0692469	0.0458483	0.0707124	0	0	0.146283	0		0.0804345	0.848732	0.197122	0.196415	0.592642	0.726471	0.464583	0.428162
PcyM_0080300	0.0385481	0.386935	0.247606	0.702823	0	0.00182352	0.343978	0.000911758		0.177789	0	0.50833	0.434149	0	0.936696	0.0888947	0.469794
PcyM_0080400	0.0474703	9.64953	0.381872	2.64807	0	0	3.18174	0		0	0	0	0	0	0	0	0
PcyM_0080500	0.206703	0.183329	0.323728	0.18951	0	0	0.225818	0		0	0	0.0151677	0	0	0	0	0.00379193
PcyM_0080600	0.026245	0.0925494	0.012247	0.0428517	0	0	0.0434733	0		0.179008	0	0	0.221365	0	1.81887	0.089504	0.510058
PcyM_0080700	0.173086	0.046263	0.105053	0.200269	0	0	0.131168	0		0.0104548	0.0330954	0.0640546	0	0	0	0.0217751	0.0160137
PcyM_0080800	0.427707	0.68216	0.312366	1.35554	0.0690749	0	0.694444	0.0345374		0	0.0798263	0.0174906	0.0348558	0.0855768	0.0322298	0.0399132	0.0425383
PcyM_0080900	0	0.033835	0.132142	0.182419	0	0	0.0870992	0		0	0.0209845	0.609218	0	0	0	0.0104922	0.152305
PcyM_0081000	0.155121	0.0770158	0.217224	0.547061	0	0	0.249105	0		0	0	0.00505105	0	0	0.0197785	0	0.00620739
PcyM_0081100	1.01401	1.3072	1.1608	3.4751	0	0	1.73928	0		0.068114	0	0.199176	0	0.413429	0	0.034057	0.153151
PcyM_0081200	1.85192	5.04691	0.272066	1.14092	0	0	2.07795	0		0	0.0783009	0	0.0922207	0.00240741	0.0186171	0.0391505	0.0283113
PcyM_0100100	0.917564	2.89508	1.28281	3.42394	0	0	2.12985	0		0.268921	0	0.49928	0.218896	1.41142	2.83366	0.134461	1.24081
PcyM_0100200	0.0151864	0.0141889	0.00954525	0.0404263	0	0	0.0198367	0		0.00637718	0.141311	0	0	0	0	0.0738442	0
PcyM_0100300	0.0306845	0.0362333	0.030656	0.0540059	0	0	0.0378949	0		20.316	0.0638962	17.4372	17.2269	44.7206	115.126	10.19	48.6277
PcyM_0100400	1.77659	1.89936	0.335183	1.91797	0	0	1.48228	0		1.36789	0.00784443	0.00838077	0.835073	9.31927	3.08864	0.687867	3.31284
PcyM_0100500	0	0.00534431	0.0105029	0.0317643	0	0	0.0119029	0		0	0	0	0.0923086	0	0	0	0.0230772
PcyM_0100600	0.75297	2.41041	0.87502	0.61582	0.0184011	0	1.16355	0.00920056		0.003923	0	0	0.0104312	0	0.00933421	0.0019615	0.00494136
PcyM_0100700	2.3675	3.0576	0.246299	0.541042	0	0	1.55311	0		0	0	0	0.00404673	0	0	0	0.00101168
PcyM_0100800	0.105415	0.18702	0.0941447	0.145372	0	0	0.132988	0		0	0.241104	0.0559974	0.113024	0	0	0.120552	0.0422554
PcyM_0100900	0.525065	25.2691	0.543729	0.626275	0	0	6.74104	0		0.0575185	0	0.0759023	0	0	0	0.0287592	0.0189756
PcyM_0101000	0.320359	2.94983	1.2066	1.82149	0	0.00452516	1.57457	0.00226258		0.198736	0	0.243523	0.24265	0	0	0.0993681	0.121543
PcyM_0101100	0.159767	0.0603172	0.0174616	0.0881165	0	0	0.0814155	0		7.68601	6.50343	15.4599	12.0403	11.5925	25.8683	7.09472	16.2403
PcyM_0101200	0.169907	0.689938	0.316242	0.667116	0	0	0.460801	0		0.171604	0	0.52569	0.471425	0	3.87603	0.0858018	1.21829
PcyM_0101300	1.10729	0.858242	0.985359	2.78709	0	0	1.43449	0		0	0	0	0	0.197583	0	0	0.0493958
PcyM_0101400	0.0482248	0.137192	0.021783	0.0634508	0.00106127	0	0.0676627	0.000530634		0.0694756	0.146619	0.170265	1.35724	0.378663	0.00168681	0.108047	0.476963
PcyM_0101500	0.152785	0.541196	0.783339	2.40373	0	0	0.970263	0		0.613357	0.647205	1.50316	0	0	0	0.630281	0.375791
PcyM_0101600	0.230121	1.24304	0.21837	0.672131	0	0	0.590915	0		0.214701	0.00739367	0.0873525	0	0.639945	1.5907	0.111047	0.5795
PcyM_0101700	0.63155	29.0646	0.641895	0.666261	0	0	7.75107	0		0.112891	0	0	0	0	0	0.0564455	0
PcyM_0101800	0.115863	0.931728	0.128244	0.231222	0	0	0.351764	0		0	0	0	0	0	0	0	0
PcyM_0101900	0.278602	1.46813	0.945391	1.23763	0	0	0.982437	0		0	0.203995	0	0	0	0	0.101998	0
PcyM_0102000	0.111357	0.0826279	0.142361	0.232557	0	0	0.142226	0		0.047584	0	0.117485	0.116197	0	2.36374	0.023792	0.649355
PcyM_0102100	0.303133	0.357583	0.351715	0.518439	0	0	0.382717	0		0.160896	0	0.39431	0.0982241	0	0	0.0804479	0.123133
PcyM_0102200	1.01808	1.03068	0.614229	1.33289	0	0	0.99897	0		0	1.1878	0	0	0	0	0.593902	0
PcyM_0102300	0.111921	0.108942	0.0431913	0.0572321	0	0.0254822	0.0803216	0.0127411		12.6978	25.3899	59.2838	97.7603	110.184	26.6301	19.0439	73.4645
PcyM_0102400	0.102231	0.0414414	0.0115466	0.0517082	0	0	0.0517318	0		10.0401	17.5924	37.3819	44.4809	20.1073	15.0582	13.8162	29.2571
PcyM_0102500	0.0613458	0.00246451	0.0101451	0.0685943	0	0	0.0356374	0		4.18267	6.27537	10.0448	10.5976	24.5295	7.62157	5.22902	13.1984
PcyM_0102600	3.13009	0.180008	0.0205653	3.19179	0.0971349	0.313712	1.63061	0.205424		28.3575	41.0278	30.9784	20.6366	31.4088	61.2215	34.6926	36.0613
PcyM_0102700	0.293607	0.317211	0.033498	0.130901	0	0	0.193804	0		2.21123	0.777751	10.3866	7.19955	24.1118	47.4322	1.49449	22.2825
PcyM_0102800	0.0815042	0.0782553	0.0798974	0.0594112	0	0	0.074767	0		1.7408	0.459216	2.43783	5.3228	6.72059	2.96846	1.10001	4.36242
PcyM_0102900	0.147734	0.384656	0.485125	21.322	0	0	5.58487	0		2.0537	3.28791	5.29336	8.81946	4.11707	7.6753	2.6708	6.4763
PcyM_0103000	8.9739	3.09545	3.18694	22.5508	0	0	9.45178	0		0	0	0	0	0	0	0	0
PcyM_0103100	2.28588	3.21591	2.5088	4.48351	0	0	3.12353	0		0	0.0108149	0	0	0	0	0.00540745	0
PcyM_0103200	0.478979	0.192129	0.263195	2.20001	0.605075	1.37771	0.783579	0.991392		119.871	97.9617	104.894	96.683	106.416	103.271	108.916	102.816
PcyM_0103300	16.668	0.410218	0.170515	1.23059	0.218555	0.637231	4.61983	0.427893		73.1707	61.0964	59.9228	50.4259	82.1478	72.2772	67.1336	66.1934
PcyM_0103400	8.8459	1.61828	0.500108	0.853663	0.60648	0.48968	2.95449	0.54808		68.984	71.3944	72.9756	76.1477	150.123	87.7801	70.1892	96.7567
PcyM_0103500	16.4715	5.18679	3.1384	0.129021	0.224973	0.476821	6.23143	0.350897		67.4672	68.1741	69.7668	52.1564	19.278	49.449	67.8207	47.6626
PcyM_0103600	0.263119	0.409404	0.483289	0.59799	0.390045	0.473388	0.438451	0.431716		47.618	44.0635	41.0661	44.6536	55.3294	41.4396	45.8407	45.6222
PcyM_0103700	10.5095	9.64506	0.103676	0.82677	0.164621	0.321217	5.27125	0.242919		39.0849	46.9079	42.5741	32.8574	23.3182	56.6098	42.9964	38.8399
PcyM_0103800	0.0375671	0.00841559	0.0342221	0.0670732	0.351877	0.53163	0.0368195	0.441754		86.1758	93.9551	74.759	60.3972	61.0448	49.0333	90.0655	61.3085
PcyM_0103900	0.141164	0.335998	0.0442121	1.61996	1.21507	0.163511	0.535334	0.689291		45.7103	47.8685	74.4576	91.0521	122.817	53.4769	46.7894	85.4509
PcyM_0104000	0.0641289	0.0149314	0.0400929	0.147171	0.645649	0.260653	0.066581	0.453151		48.6953	31.8702	34.7441	35.3721	91.0279	63.8239	40.2828	56.242
PcyM_0104100	0.800519	1.62071	0.00883553	0.0850682	0	0.0306124	0.628784	0.0153062		9.35937	12.1135	11.2785	8.14444	13.8097	16.346	10.7364	12.3947
PcyM_0104200	1.73513	0.0272191	0.165837	1.91385	0.0934817	0.29021	0.96051	0.191846		46.9496	67.3525	38.1025	29.5385	23.5019	57.6803	57.1511	37.2058
PcyM_0104300	0.024719	0.0212375	0.0535345	0.491252	0	0.216954	0.147686	0.108477		30.6334	41.0509	32.3932	28.3114	32.9868	36.0154	35.8422	32.4267
PcyM_0104400	0.0644153	0.0220279	0.0676588	0.023772	0.0412864	0.216679	0.0444685	0.128983		33.8119	46.1396	47.7236	42.7686	26.2227	48.3987	39.9758	41.2784
PcyM_0104500	1.60254	5.74677	2.248	0.996828	0.203913	0.305764	2.64853	0.254838		95.183	89.105	91.8035	95.0762	77.6288	148.538	92.144	103.262
PcyM_0104600	0.00126572	0.0466537	0.00556614	0.0192073	0.238945	0.315114	0.0181732	0.27703		65.2474	53.6434	71.6987	68.7256	31.9513	50.1351	59.4454	55.6277
PcyM_0104700	0.724445	0.121516	0.245272	0.185884	0.643399	0.363642	0.319279	0.503521		96.1036	68.222	89.7635	95.858	64.9907	106.993	82.1628	89.4013
PcyM_0104800	0.126744	0.117691	2.74575	10.6601	0.39137	0.131666	3.41257	0.261518		12.8994	16.4274	34.4743	33.5741	11.9601	26.3141	14.6634	26.5807
PcyM_0104900	1.31023	7.29823	6.84619	4.79604	0.540462	0	5.06267	0.270231		52.3385	58.3338	66.8383	48.6044	158.69	69.9128	55.3362	86.0113
PcyM_0105000	0.0188491	0.442338	0.0784883	0.876655	0	0.44911	0.354082	0.224555		38.1977	53.0985	36.5633	44.151	124.5	65.6621	45.6481	67.7192
PcyM_0105100	0.508969	0.0555083	1.15755	0.0880403	0.0981181	0.271618	0.452518	0.184868		31.7961	49.6294	25.2936	25.434	15.1601	43.8557	40.7128	27.4358
PcyM_0105200	0.0200458	0.0310934	5.79834	0.129655	0.174558	0.279808	1.49478	0.227183		91.8101	119.901	65.1304	64.6806	6.7263	84.3988	105.855	55.234
PcyM_0105300	0.0828807	0.152073	0.0111146	0.140035	0.315452	0.451776	0.0965258	0.383614		35.1512	43.6084	38.5727	30.9513	26.5152	37.917	39.3798	33.489
PcyM_0105400	0.961997	0.0963151	0.0163068	1.04686	0.417507	0.624285	0.530369	0.520896		75.9886	83.9973	95.0324	95.0795	114.028	63.4502	79.993	91.8974
PcyM_0105500	0.0505776	5.16589	0.319144	0.7523	0.699665	0.376613	1.57198	0.538139		46.2009	39.7724	44.8224	39.8072	35.8283	27.2919	42.9867	36.9375
PcyM_0105600	0.278928	1.31493	0.726295	3.52496	0.540819	0.348557	1.46128	0.444688		47.6954	62.4947	43.1292	46.9508	33.761	56.9985	55.095	45.2099
PcyM_0105700	0.110626	0.0492756	0.0546419	0.251863	0	0.0334521	0.116602	0.0167261		14.5503	14.8067	35.4162	33.9439	17.0413	9.69668	14.6785	24.0245
PcyM_0105800	0.00765004	0.0126936	0.0088454	0.0237399	0.127925	0.167843	0.0132323	0.147884		35.8972	34.3573	34.2195	35.4948	22.8814	26.3451	35.1272	29.7352
PcyM_0105900	5.87966	32.3902	5.56864	3.51232	0.668469	0.359821	11.8377	0.514145		72.7832	87.7024	103.993	95.4226	64.4589	111.015	80.2428	93.7224
PcyM_0106000	4.91596	0.651154	0.0774285	1.77714	0.864518	0.905768	1.85542	0.885143		193.077	165.596	185.499	185.463	203.448	200.464	179.337	193.719
PcyM_0106100	0.0649619	0.938011	4.57988	3.05314	0.219253	0.147523	2.159	0.183388		52.1483	60.7394	43.754	48.7477	26.8722	54.1359	56.4438	43.3774
PcyM_0106200	0.0786988	0.601556	1.54877	0.121469	0.274112	0.0948521	0.587624	0.184482		34.3405	58.0163	42.9792	27.1264	16.4462	38.5888	46.1784	31.2852
PcyM_0106300	0.833986	0.658916	0.239488	0.0898933	10.2818	8.78783	0.455571	9.5348		1211	1016.75	866.414	881.586	1728.62	694.146	1113.88	1042.69
PcyM_0106400	0.226719	0.74582	0.0402134	0.589889	0	0.00297674	0.40066	0.00148837		9.99123	16.6438	20.1105	12.1802	19.8779	33.4358	13.3175	21.4011
PcyM_0106500	9.25886	5.99486	4.99274	13.3132	10.3638	8.47991	8.38991	9.42184		1281.07	1090.75	932.725	992.172	2034.99	797.034	1185.91	1189.23
PcyM_0106600	30.0422	28.9634	11.9401	18.5075	0.836017	1.14445	22.3633	0.990234		192.711	177.838	140.932	153.026	243.954	149.131	185.274	171.761
PcyM_0106700	0.0400285	3.5833	0.442631	0.432411	0	0.125682	1.12459	0.0628408		33.755	25.7613	25.7537	32.66	33.941	56.5639	29.7582	37.2296
PcyM_0106800	0.00258454	0.138125	0.12059	0.0246556	0.172189	0.264153	0.0714889	0.218171		70.1467	73.2991	67.262	62.6509	17.834	66.9187	71.7229	53.6664
PcyM_0106900	0.0764483	0.0438432	0.0915841	0.13376	0.214817	0.433615	0.0864088	0.324216		86.3184	71.1806	78.1727	73.421	10.6454	64.3338	78.7495	56.6432
PcyM_0107000	0.0918317	0.52041	0.0808923	0.29259	0.600125	0.404149	0.246431	0.502137		86.4177	90.8747	82.4135	75.0888	18.3395	54.9293	88.6462	57.6928
PcyM_0107100	29.8376	6.53701	7.29819	32.9461	2.93749	1.18588	19.1547	2.06169		197.583	192.346	148.813	173.65	356.419	206.363	194.964	221.311
PcyM_0107200	0.210928	0.0263058	0.0130216	0.0502219	0	0	0.0751192	0		9.52446	11.7251	26.3984	35.164	14.8318	5.12044	10.6248	20.3787
PcyM_0107300	0.244294	0.0818926	0.0347016	0.0843891	0.275538	0.556183	0.111319	0.415861		74.1564	91.7968	69.072	65.9567	60.7628	26.7341	82.9766	55.6314
PcyM_0107400	0.22294	1.67846	5.82213	6.95631	0.105138	0.382004	3.66996	0.243571		38.0467	68.516	42.7143	37.9053	22.4907	24.4179	53.2814	31.882
PcyM_0107500	0.0254747	0.156482	6.71654	2.3514	0.133539	0.266591	2.31248	0.200065		40.9786	42.0527	49.6065	42.1161	25.5253	48.0942	41.5157	41.3355
PcyM_0107600	0.0632729	0.0452628	0.225158	0.0526868	0.981592	0.036025	0.0965952	0.508809		12.2312	13.0346	19.8344	12.9279	5.52769	9.48067	12.6329	11.9427
PcyM_0107700	2.96233	1.63186	1.79202	3.89985	0	0	2.57152	0		0	0	0	0	0	0	0	0
PcyM_0107800	29.7518	11.1262	8.09629	25.8625	0	0	18.7092	0		0.0130196	0	0	0	0	0.052713	0.00650979	0.0131783
PcyM_0107900	2.45521	0.989196	0.202781	0.67709	0	0	1.08107	0		0	0	0	0	0	0	0	0
PcyM_0108000	0.242217	0.351565	0.544502	1.11937	0	0	0.564414	0		0	0.00986533	0	0	0	0	0.00493267	0
PcyM_0108100	0.0206566	0.134339	0.0738637	1.94825	0.0255365	0.350514	0.544277	0.188025		47.5371	54.0957	51.6643	48.9163	47.7404	60.9852	50.8164	52.3265
PcyM_0108200	0.140849	0.106147	0.0601924	0.105101	0.160368	0.221971	0.103072	0.191169		36.2604	88.6057	196.866	213.164	103.203	83.3559	62.4331	149.147
PcyM_0108300	0.0257016	0.0878536	0.958892	0.158586	1.37099	0.434875	0.307758	0.902931		80.6248	108.445	85.9198	58.9091	66.2421	75.6939	94.5347	71.6912
PcyM_0108400	0.956578	8.95553	4.30553	0.254271	0.39989	0.260785	3.61798	0.330338		76.4594	71.2054	91.9166	97.3881	120.902	77.8666	73.8324	97.0184
PcyM_0108500	0.197544	0.136152	0.106321	0.397357	0.86278	0.304771	0.209344	0.583776		28.9803	36.7835	43.4817	34.0321	15.3654	12.1223	32.8819	26.2504
PcyM_0108600	0.00384002	0.00268121	0.00323003	0.0266375	0.126137	0.134794	0.00909719	0.130465		24.1207	40.0322	30.3656	30.6335	7.75823	21.5927	32.0765	22.5875
PcyM_0108700	12.5109	145.513	12.576	16.6696	0.206042	0.449175	46.8174	0.327608		82.5143	65.2115	70.5038	65.71	17.7154	73.5395	73.8629	56.8672
PcyM_0108800	0.126279	0.14223	2.07196	0.0442638	0.717839	0.515194	0.596184	0.616516		95.9986	59.2473	67.6804	70.7583	187.352	54.4051	77.623	95.049
PcyM_0108900	0.0841474	0.243047	0.0408988	0.197729	0.0475393	0.134344	0.141456	0.0909414		22.9197	20.9006	19.9414	21.374	2.59144	6.00231	21.9101	12.4773
PcyM_0109000	0.522865	7.94716	0.68001	0.361335	0.618193	0.748706	2.37784	0.683449		83.0474	75.4718	95.3918	80.8096	52.335	54.2563	79.2596	70.6982
PcyM_0109100	0.584162	0.0360277	0.0466749	0.107424	0	0.136235	0.193572	0.0681176		73.7393	88.9572	87.39	72.1609	64.3843	83.4986	81.3483	76.8585
PcyM_0109200	0.0791355	0.00160816	0.00382249	0.0446657	0	0	0.032308	0		7.94016	9.60528	18.2378	14.5623	5.07003	18.3036	8.77272	14.0434
PcyM_0109300	28.924	6.00738	8.54261	19.6576	2.3223	0.792614	15.7829	1.55746		105.546	98.1558	93.0747	100.327	147.38	124.77	101.851	116.388
PcyM_0109400	16.9028	18.2743	8.38661	11.198	3.19852	5.59156	13.6904	4.39504		995.226	981.133	771.439	757.552	1558.56	953.439	988.179	1010.25
PcyM_0109500	0.949463	1.22473	2.73297	1.24349	0.00997991	0.0472619	1.53766	0.0286209		7.65935	14.8649	6.00424	7.12484	15.8004	17.7484	11.2621	11.6695
PcyM_0109600	0.0365209	0.0974019	0.337337	0.52437	0.10574	0.284586	0.248908	0.195163		50.9312	75.0205	62.998	49.1994	7.03038	67.2691	62.9758	46.6242
PcyM_0109700	0.0571571	0.450778	0.174955	12.5162	0.429125	0.0866203	3.29978	0.257873		51.6493	50.6012	47.6907	46.9838	64.0629	53.6857	51.1252	53.1058
PcyM_0109800	9.32176	0.170476	2.38288	2.86603	4.73092	1.52195	3.68529	3.12644		379.02	336.453	366.4	373.594	568.183	291.037	357.736	399.803
PcyM_0109900	0.24232	0.187687	0.131296	1.48749	1.11722	1.30561	0.512198	1.21142		327.323	303.113	237.27	226.124	189.005	284.006	315.218	234.101
PcyM_0110000	0.0753457	0.146761	0.0366093	0.0597675	0.467373	0.283022	0.0796209	0.375198		40.596	38.3383	33.635	34.1468	25.7667	34.7226	39.4672	32.0678
PcyM_0110100	0.436886	2.0832	0.24646	1.30786	0.0268386	0	1.0186	0.0134193		31.4247	24.8506	25.4229	34.2606	46.8617	3.81198	28.1377	27.5893
PcyM_0110200	5.04194	2.55095	1.83992	4.61917	0.921469	0.744006	3.51299	0.832738		165.89	128.631	135.516	137.332	186.082	62.4288	147.261	130.34
PcyM_0110300	0.141241	0.164595	0.144042	0.220661	0	0.0120366	0.167635	0.00601831		21.6736	24.0181	16.8416	27.7536	33.6137	7.16168	22.8459	21.3427
PcyM_0110400	21.1763	29.3315	24.8045	12.1815	0.367937	0.622447	21.8735	0.495192		130.636	109.687	110.679	111.437	74.8439	97.7403	120.161	98.675
PcyM_0110500	0.031831	0.0358035	0.0395955	0.0607161	0.396192	0.493165	0.0419865	0.444678		95.1007	94.1721	82.93	86.1025	42.1305	102.385	94.6364	78.387
PcyM_0110600	0.021688	0.0283318	2.60283	0.0186096	0.100692	0.298361	0.667864	0.199527		38.9098	40.8155	41.095	33.8842	17.9324	25.4784	39.8626	29.5975
PcyM_0110700	15.3957	0.399079	1.22242	13.0231	0.445899	0.290404	7.51008	0.368151		36.995	39.1525	50.445	45.6647	23.2325	39.8595	38.0737	39.8004
PcyM_0110800	0.252329	1.01204	0.372865	1.11351	0.428898	0.923462	0.687687	0.67618		81.0159	84.2522	80.9956	93.8586	111.055	131.419	82.634	104.332
PcyM_0110900	0.601752	0.731297	13.274	8.06924	0.309519	0.541472	5.66906	0.425496		50.7285	71.9379	60.6067	52.8306	72.2828	58.8581	61.3332	61.1446
PcyM_0111000	0.342012	5.68083	19.0623	8.99975	1.61692	1.41081	8.52121	1.51387		203.151	178.398	163.32	154.201	142.971	126.772	190.775	146.816
PcyM_0111100	0.733627	0.380395	0.118447	0.435625	0.640114	0.200497	0.417023	0.420305		30.3352	32.4176	45.7293	58.511	27.4242	32.773	31.3764	41.1094
PcyM_0111200	0.633858	4.72048	1.20689	3.87825	0	0.214308	2.60987	0.107154		20.634	18.7168	22.6225	18.5635	35.5141	7.35641	19.6754	21.0141
PcyM_0111300	3.72984	0.0726617	0.955635	0.283372	0.0170934	0.234624	1.26038	0.125859		37.6446	42.1549	33.8941	29.0808	8.93667	33.189	39.8998	26.2751
PcyM_0111400	32.2806	2.21116	3.62658	15.7681	0.0568074	0.30578	13.4716	0.181294		41.7857	53.6157	52.3786	52.564	48.3266	64.5524	47.7007	54.4554
PcyM_0111500	0.028386	0.0337852	0.157613	0.194996	0.387337	0.729728	0.103695	0.558533		97.395	112.786	109.99	128.032	104.932	48.3087	105.091	97.8156
PcyM_0111600	0.022632	22.0791	1.07942	0.104541	0.697655	0.516355	5.82143	0.607005		90.0286	97.1582	96.6744	102.443	186.406	63.916	93.5934	112.36
PcyM_0111700	0.0410501	0.0209434	0.0076234	0.00560975	0.346762	0.26219	0.0188067	0.304476		43.5676	59.3625	54.4423	52.3558	4.73112	42.0802	51.465	38.4024
PcyM_0111800	1.09072	1.37667	3.65077	14.077	0.924947	0.865626	5.04879	0.895287		128.199	146.754	115.301	141.407	258.456	111.864	137.476	156.757
PcyM_0111900	7.78324	6.63435	8.17871	5.31784	0.324849	0.636984	6.97853	0.480916		77.5328	87.0206	77.5167	86.0484	56.4587	81.2091	82.2767	75.3082
PcyM_0112000	1.59577	11.413	5.4595	5.23587	0.411735	0.24933	5.92603	0.330532		64.1563	78.7326	58.1437	62.9061	56.1107	43.744	71.4445	55.2261
PcyM_0112100	16.0001	30.1937	19.5174	40.0492	4.43321	3.66268	26.4401	4.04795		684.634	569.234	512.794	558.449	1148.83	600.272	626.934	705.086
PcyM_0112200	0.584638	0.188369	0.178866	0.166278	0.471011	0.597615	0.279538	0.534313		104.296	125.125	98.7878	90.7958	15.1719	117.696	114.711	80.6129
PcyM_0112300	0.0567413	7.23335	0.0277474	0.040575	0.464895	0.50942	1.8396	0.487157		58.9008	72.2796	67.2416	68.5673	80.3049	71.5824	65.5902	71.9241
PcyM_0112400	6.85348	2.81095	1.28856	2.63735	2.76872	1.39719	3.39758	2.08295		220.194	196.916	181.868	170.1	219.177	229.904	208.555	200.262
PcyM_0112500	0.00967141	0.0241207	0.0323942	1.1347	0.693646	0.640068	0.300221	0.666857		104.325	119.943	97.7757	88.4864	22.0568	71.7625	112.134	70.0203
PcyM_0112600	0.495274	0.727606	1.01387	2.10584	0.0249275	0.110697	1.08565	0.0678124		11.2191	1.77573	8.94298	11.8717	23.7796	17.3104	6.49742	15.4762
PcyM_0112700	24.6384	4.90303	3.82839	5.9334	0.173314	0.244888	9.82581	0.209101		18.4962	19.7663	24.9092	22.6193	8.58872	13.4765	19.1313	17.3984
PcyM_0112800	0.136777	2.87513	0.798852	1.59297	0.147883	0.259611	1.35093	0.203747		47.5951	67.9322	53.6711	49.0666	22.7794	85.3889	57.7637	52.7265
PcyM_0112900	0.0516775	0.0741236	0.0125267	0.0160096	0.480022	0.296382	0.0385843	0.388202		81.5457	85.9747	92.4623	91.7004	33.583	85.7374	83.7602	75.8708
PcyM_0113000	40.5278	103.628	18.7884	8.38482	3.60589	1.68901	42.8323	2.64745		243.814	223.259	221.257	230.173	428.574	288.5	233.536	292.126
PcyM_0113100	25.9393	4.27419	0.125644	4.15974	0.64679	1.30294	8.62472	0.974863		168.179	183.463	193.596	213.117	102.942	191.731	175.821	175.347
PcyM_0113200	1.08204	0.105854	0.0185261	0.34676	0.194422	0.125583	0.388296	0.160002		19.8968	31.7567	56.8444	93.0629	24.5205	36.4324	25.8268	52.715
PcyM_0113300	0.159329	0.810469	0.111602	0.240073	0.351148	0.221362	0.330368	0.286255		47.6741	52.9771	60.9378	49.9908	46.4405	40.1418	50.3256	49.3777
PcyM_0113400	52.8857	1.99496	0.10628	1.01105	0	0.185743	13.9995	0.0928714		11.295	19.5741	16.3393	15.7061	24.5104	7.79275	15.4345	16.0871
PcyM_0113500	0.0493808	0.169963	0.0202628	0.0833863	0.0785532	0.26427	0.0807483	0.171412		39.8719	44.4839	50.4181	33.0398	10.6078	40.5998	42.1779	33.6664
PcyM_0113600	0.124043	0.0406517	1.06026	0.146229	1.65845	0.803431	0.342795	1.23094		158.557	163.253	136.563	167.472	114.512	203.011	160.905	155.39
PcyM_0113700	0.112359	0.0516805	0.0194291	0.0802054	3.28618	1.07223	0.0659185	2.1792		216.085	217.655	231.755	232.781	228.965	207.456	216.87	225.239
PcyM_0113800	0.111474	0.0126557	0.0244026	0.0766152	0.297324	0.180048	0.0562869	0.238686		20.0406	28.6685	48.8745	47.6954	14.6728	45.7043	24.3546	39.2367
PcyM_0113900	1.1464	0.554354	0.19955	0.0611026	0.656931	0.530415	0.490352	0.593673		130.563	164.904	125.026	116.894	14.3784	120.804	147.734	94.2755
PcyM_0114000	0.944927	6.02947	9.54154	5.14821	2.79458	1.69229	5.41604	2.24343		350.557	308.593	281.107	280.504	226.172	399.896	329.575	296.92
PcyM_0114100	1.05791	4.38093	0.210904	1.99748	0.280041	0.329201	1.9118	0.304621		71.1714	65.1765	59.6465	72.0396	102.169	74.9561	68.174	77.2027
PcyM_0114200	0.189685	0.033103	0.0184932	0.0343526	0.688934	0.419865	0.0689085	0.554399		89.7318	83.7801	81.026	81.7394	114.798	84.0675	86.756	90.4078
PcyM_0114300	0.0659227	1.342	0.175	1.17832	0	0.302156	0.690311	0.151078		111.435	120.457	104.443	101.576	76.0353	99.8779	115.946	95.4832
PcyM_0114400	0.345425	0.153052	0.163942	0.648864	0	0.094107	0.327821	0.0470535		49.49	55.7351	41.4404	44.6399	27.7244	44.3276	52.6125	39.5331
PcyM_0114500	0.0925885	1.05782	0.059308	0.241712	0.113818	0.0459492	0.362857	0.0798838		41.9123	47.665	50.4065	51.2051	23.9716	15.5975	44.7887	35.2952
PcyM_0114600	2.04367	7.97697	1.57117	4.72686	0	0.157797	4.07967	0.0788986		57.9586	83.3565	55.8931	50.8095	11.3799	89.675	70.6575	51.9394
PcyM_0114700	0.536336	0.143487	0.161676	0.225068	0	0	0.266642	0		0.799115	3.13194	1.25897	1.11508	0.622203	0.773301	1.96553	0.942389
PcyM_0114800	5.94052	7.46744	24.8275	22.8759	0.394204	0.763885	15.2778	0.579044		84.4354	92.8107	81.6296	84.5712	135.867	103.914	88.623	101.496
PcyM_0114900	0.300266	3.60464	7.48682	2.42869	1.72882	0.837525	3.45511	1.28317		153.496	166.735	147.639	128.397	191.052	167.171	160.116	158.565
PcyM_0115000	1.21676	0.145666	9.01738	0.00501612	0.801856	0.712172	2.59621	0.757014		79.1985	86.8931	82.6818	75.1305	43.7104	89.1048	83.0458	72.6569
PcyM_0115100	0.321901	0.123076	0.270653	0.40943	0.60728	0.531187	0.281265	0.569233		122.668	92.57	128.874	133.269	76.1136	78.3271	107.619	104.146
PcyM_0115200	0.545158	5.70331	0.169353	0.0546017	0.503943	0.51786	1.61811	0.510902		59.6609	75.3085	81.9732	82.6011	34.5654	80.8398	67.4847	69.9949
PcyM_0115300	0.305186	0.0212767	1.08424	4.66553	0.12755	0.32183	1.51906	0.22469		43.2417	50.8457	40.5288	30.6029	13.4911	50.9524	47.0437	33.8938
PcyM_0115400	0.0906913	0.0290285	0.0845715	0.153967	0.162074	0.130861	0.0895645	0.146468		28.8837	39.5735	35.3922	32.0286	8.70173	56.1498	34.2286	33.0681
PcyM_0115500	0.370591	0.365073	4.85333	0.171861	0.615602	0.76332	1.44021	0.689461		110.068	87.4371	107.785	121.707	15.2806	87.4078	98.7528	83.0451
PcyM_0115600	7.10634	5.20739	9.50691	10.4858	0.670861	0.361108	8.07661	0.515985		87.289	107.325	82.0615	79.5952	126.193	103.641	97.3071	97.8726
PcyM_0115700	0.142298	0.159035	0.593966	0.181507	0.302713	0.0872908	0.269201	0.195002		40.2092	46.6065	52.5226	41.0825	5.49151	25.8687	43.4078	31.2413
PcyM_0115800	0.168123	0.0857539	8.47305	6.50867	0.302463	0.122106	3.8089	0.212285		24.2008	37.0711	31.845	29.1286	41.3442	36.4813	30.6359	34.6998
PcyM_0115900	3.66336	0.404437	0.587743	0.689657	0	0	1.3363	0		0.68378	2.40986	1.40467	0.834872	2.89863	1.54395	1.54682	1.67053
PcyM_0116000	0.438287	56.7874	0.173317	0.357172	0.89802	0.217522	14.439	0.557771		36.0896	50.4878	44.0726	43.1171	16.1691	42.035	43.2887	36.3485
PcyM_0116100	0.0533759	0.823642	0.0464174	0.0477903	0	0.119094	0.242806	0.0595471		13.7197	22.161	16.6636	14.1723	2.41215	10.5381	17.9404	10.9466
PcyM_0116200	0.0113236	0.208355	1.6154	0.29594	0.504874	0.237791	0.532754	0.371333		75.6472	81.073	78.4684	91.6176	78.7072	122.956	78.3601	92.9373
PcyM_0116300	0.10089	0.398074	0.233364	3.41578	0	0.191729	1.03703	0.0958645		14.0879	15.2088	20.4375	24.0219	30.8899	57.7698	14.6484	33.2798
PcyM_0116400	0.0325644	0.0727865	0.019556	0.039362	0.182004	0.0921984	0.0410672	0.137101		26.7773	36.3664	59.0713	49.3033	25.5079	20.2474	31.5719	38.5325
PcyM_0116500	0.366366	0.385598	0.153428	0.255829	0	0	0.290305	0		15.7275	10.1081	18.9234	23.9161	58.1854	19.3702	12.9178	30.0988
PcyM_0116600	0.00217016	0.271868	0.0336407	0.0838877	0	0.286704	0.0978917	0.143352		36.8301	33.2669	54.7732	77.4601	115.699	44.6148	35.0485	73.1367
PcyM_0116700	0.0234515	0.045257	0.00452291	0.0108357	0.0017193	0.187405	0.0210168	0.0945621		25.2717	28.7389	28.8037	26.2393	50.7055	39.4315	27.0053	36.295
PcyM_0116800	2.25552	2.03242	0.050975	2.22114	1.76362	0.460696	1.64001	1.11216		100.811	81.8146	70.2166	66.8554	135.467	96.9608	91.3127	92.3749
PcyM_0117000	0.129629	0.031644	0.0259948	0.0534099	0	0	0.0601695	0		0.887713	1.17843	2.77205	2.4824	3.95389	6.53052	1.03307	3.93471
PcyM_0117100	3.82313	0.117126	1.32279	1.33472	0	0.00265001	1.64944	0.001325		0.335721	0.361194	0.411378	0	1.82978	3.03217	0.348457	1.31833
PcyM_0117200	0.00443605	0.0311929	0.0155789	0.110732	0	0.197828	0.0404849	0.098914		19.5631	3.21484	20.2385	24.0816	92.35	78.9314	11.389	53.9004
PcyM_0117300	0.752929	1.81969	1.01989	2.17611	0	0.00352431	1.44215	0.00176216		27.2415	21.8852	24.6561	34.9617	14.6225	31.1045	24.5633	26.3362
PcyM_0117400	4.85349	30.0345	2.58973	1.24296	0.829717	0.904398	9.68016	0.867058		116.442	89.9123	75.987	80.3432	127.053	75.7594	103.177	89.7856
PcyM_0117500	96.6122	0.022691	4.66391	12.6193	0	0.00848676	28.4795	0.00424338		24.5996	21.631	37.486	32.3457	28.0757	18.515	23.1153	29.1056
PcyM_0117600	1.62068	0.0102994	1.45304	0.153753	0	0.560011	0.809443	0.280006		81.5459	81.6185	83.0762	90.4668	207.83	51.6599	81.5822	108.258
PcyM_0117700	0.661812	0.683047	2.30887	0.788415	0.386612	0.602014	1.11054	0.494313		56.1866	58.3008	70.887	88.889	81.0148	62.7603	57.2437	75.8878
PcyM_0117800	0.12776	0.178289	0.111995	0.905595	1.67754	0.912795	0.33091	1.29517		92.688	100.462	101.901	88.8543	84.3068	30.3222	96.575	76.3462
PcyM_0117900	0.130146	0.209041	0.330007	0.182483	0.0302825	0.305631	0.212919	0.167957		35.4222	77.4631	50.4835	39.8413	12.3437	82.0179	56.4427	46.1716
PcyM_0118000	0.35874	6.3807	46.7078	27.1075	0.203455	0.30801	20.1387	0.255732		42.4893	50.3971	39.7816	34.5571	12.2249	40.141	46.4432	31.6761
PcyM_0118100	1.53836	6.97094	3.41243	1.2173	0.103975	0.419754	3.28476	0.261864		43.8889	47.3627	39.7917	40.1685	68.014	51.1506	45.6258	49.7812
PcyM_0118200	0.0225695	2.00446	0.512778	0.0184159	0.247578	0.269862	0.639555	0.25872		46.7034	61.1866	42.0839	41.7306	31.0405	53.9794	53.945	42.2086
PcyM_0118300	3.66074	0.206665	2.80794	0.254084	0.619603	0.500276	1.73236	0.55994		87.3212	105.738	98.4575	79.5322	40.5562	123.071	96.5297	85.4042
PcyM_0118400	0.0866576	0.192892	0.0609751	0.421619	0.101779	0.51361	0.190536	0.307694		66.7055	79.9365	66.8465	63.0901	49.807	87.0549	73.321	66.6996
PcyM_0118500	0.13831	0.142312	0.120708	0.187367	0.185515	0.253511	0.147174	0.219513		60.2027	64.8761	58.3368	59.3733	56.472	70.7545	62.5394	61.2342
PcyM_0118600	0.416771	0.127532	2.62714	0.161165	5.73275	3.85984	0.833152	4.7963		641.006	516.316	493.335	594.349	1020.53	498.37	578.661	651.646
PcyM_0118700	0.523845	5.83848	1.98157	2.21099	1.65927	1.16428	2.63872	1.41177		141.129	119.38	138.754	128.878	146.785	104.597	130.255	129.754
PcyM_0118800	0.722231	0.0607452	1.16926	0.0146587	0.163033	0.131635	0.491723	0.147334		40.6627	41.5152	39.2815	32.8647	9.02184	25.4796	41.0889	26.6619
PcyM_0118900	0.6622	0.0567061	0.118428	0.351889	0.395141	0.255233	0.297306	0.325187		60.3042	69.9441	57.6834	50.139	7.44099	51.959	65.1241	41.8056
PcyM_0119000	4.85927	166.704	5.90645	7.90311	0.275582	0.111254	46.3433	0.193418		35.518	42.3118	37.4346	40.0108	6.35891	16.0714	38.9149	24.9689
PcyM_0119100	0.225414	0.0311021	0.0481908	25.621	0.241859	0.442375	6.48142	0.342117		30.4295	39.9402	38.9375	31.4142	13.6336	16.572	35.1848	25.1393
PcyM_0119200	0.0513289	5.93973	0.00638033	0.728612	0.144652	0.437976	1.68151	0.291314		37.8874	42.7659	33.1489	29.8987	11.6486	28.4535	40.3266	25.7874
PcyM_0119300	0.0637375	0.505761	0.0352357	0.0959189	0.258271	0.695103	0.175163	0.476687		74.1762	68.0897	65.6785	65.2997	51.0887	44.1417	71.1329	56.5521
PcyM_0119400	18.3948	0.11986	1.81864	0.118496	0.109873	0.066535	5.11295	0.0882042		22.0031	27.711	45.5393	46.9299	29.7427	46.1011	24.857	42.0782
PcyM_0119500	25.5197	63.5129	13.9975	1.06814	0.0318451	0.398538	26.0246	0.215192		34.854	58.4543	44.5318	36.8019	13.335	53.986	46.6542	37.1637
PcyM_0119600	12.7114	33.2442	2.30313	7.43322	0.768426	0.310219	13.923	0.539322		31.7361	35.3588	44.2068	22.3928	16.6234	23.9368	33.5475	26.79
PcyM_0119700	5.28443	1.17336	10.3838	7.35508	0.342722	0.384331	6.04916	0.363527		76.406	62.2547	77.8008	88.5702	67.0393	71.1233	69.3303	76.1334
PcyM_0119800	0.141743	0.00587476	1.08516	1.41332	0.259337	0.242494	0.661524	0.250915		46.169	51.8246	50.8014	52.8413	95.8914	75.0477	48.9968	68.6454
PcyM_0119900	0.279113	29.7968	0.166439	0.909361	0	0	7.78793	0		9.57435	16.8378	15.2872	13.4612	17.9215	24.894	13.2061	17.891
PcyM_0120000	0.0785801	2.08172	0.654368	0.196956	0.416604	0.216239	0.752907	0.316422		33.3605	47.0519	50.3385	47.4051	14.255	35.1127	40.2062	36.7778
PcyM_0120100	1.93188	3.93355	1.87273	0.384409	0.138545	0.231717	2.03064	0.185131		43.5769	47.4813	52.8406	47.4432	9.95531	35.1721	45.5291	36.3528
PcyM_0120200	0.299649	0.680934	11.9465	11.1235	0.522279	0.383359	6.01265	0.452819		38.4971	47.0444	37.2938	36.1916	48.1759	44.888	42.7707	41.6373
PcyM_0120300	6.82053	0.576893	0.225844	4.18713	0.140857	0.199027	2.9526	0.169942		24.6057	36.8423	27.8066	24.6871	14.3969	30.3639	30.724	24.3136
PcyM_0120400	31.3546	58.4446	9.83242	8.86986	2.44175	2.38223	27.1254	2.41199		579.365	624.377	458.052	442.622	666.794	459.727	601.871	506.799
PcyM_0120500	0.0665419	0.467176	0.00864914	0.222992	0.000724248	0.0859608	0.19134	0.0433425		18.0413	41.4061	37.275	32.8629	8.44151	17.5951	29.7237	24.0436
PcyM_0120600	0.0992958	0.0906565	0.134833	1.49134	0	0.473014	0.454031	0.236507		4.52764	8.43087	12.075	13.0073	39.6768	18.6423	6.47926	20.8504
PcyM_0120700	9.42478	16.3986	4.0397	4.52214	0.207326	0.746851	8.59631	0.477089		99.5753	87.1646	85.9769	77.6903	30.9906	81.7845	93.37	69.1106
PcyM_0120800	3.0451	3.04197	3.87904	0.721371	0.0966758	0.219536	2.67187	0.158106		33.3501	54.5813	32.6445	25.7677	19.0736	48.301	43.9657	31.4467
PcyM_0120900	0.588023	1.83137	1.27479	7.31179	0.174316	0.105559	2.7515	0.139937		23.7215	42.458	26.1457	24.0926	20.0843	16.9094	33.0897	21.808
PcyM_0121000	0.0451843	0.0736532	0.0367506	0.0968973	0.159436	0.551704	0.0631214	0.35557		57.5457	72.9312	60.6555	51.4871	34.1296	57.3401	65.2385	50.9031
PcyM_0121100	0.0448684	0.150266	0.0990562	0.434171	2.63145	1.95693	0.18209	2.29419		296.053	233.545	206.117	216.621	455.042	282.773	264.799	290.138
PcyM_0121200	0.268172	0.426742	0.635233	0.27334	0.409843	0.628734	0.400872	0.519288		75.4181	62.4755	55.3252	52.7666	13.3031	49.538	68.9468	42.7332
PcyM_0121300	1.60318	0.30113	0.984899	0.207293	0	0.0493346	0.774126	0.0246673		10.4167	15.1684	28.0302	31.4909	17.4865	19.7572	12.7925	24.1912
PcyM_0121400	0.932903	0.331665	0.638638	1.53169	0	0	0.858724	0		2.29428	2.42295	3.88744	7.33657	0.396969	31.0823	2.35861	10.6758
PcyM_0121500	0.698178	0.116397	13.5179	1.54704	0	0	3.96989	0		0.593359	0.626103	0.363539	0	1.078	0.66989	0.609731	0.527856
PcyM_0121600	6.18126	23.0561	4.10241	1.67888	0.166036	0.100545	8.75466	0.133291		29.1538	28.0611	31.9982	28.9624	40.1522	41.496	28.6074	35.6522
PcyM_0121700	0.291412	0.29965	0.0741416	0.176725	0.122397	0.135885	0.210482	0.129141		20.7725	0.815199	52.0538	31.77	57.5844	165.94	10.7938	76.8372
PcyM_0121800	3.03546	0.0876349	0.0340582	0.0926034	0	0	0.812439	0		5.39991	2.85686	5.1556	2.39	6.27601	7.79495	4.12838	5.40414
PcyM_0121900	0.0378577	0.0409932	0.0950036	0.103302	0	0.0148976	0.0692891	0.00744878		1.30854	0	1.20258	2.40165	2.97766	5.17062	0.654272	2.93813
PcyM_0122000	2.82321	3.63631	0.396409	1.96752	0	0	2.20586	0		9.55812	8.74084	15.0956	11.1515	16.5931	26.3778	9.14948	17.3045
PcyM_0122100	0.140618	0.39108	0.0644062	0.304327	0	0	0.225108	0		0.758178	0.320007	0.371616	0	0.826461	0	0.539092	0.299519
PcyM_0122200	0.177102	0.0598082	0.00798834	0.0110811	0	0.00466008	0.0639949	0.00233004		5.20858	3.84172	9.33687	11.6293	5.06561	22.6956	4.52515	12.1818
PcyM_0122300	0.0275793	0.138993	0.013827	0.154272	0	0	0.0836678	0		0.611067	0.21493	1.49755	0.130566	0	1.37976	0.412998	0.75197
PcyM_0122400	0.291536	0.978241	0.787303	1.27627	0	0	0.833337	0		0.0777745	0.164133	0.285905	0.289009	0.0122868	0	0.120954	0.1468
PcyM_0122500	1.50162	0.501474	0.271696	0.890333	0	0.00239409	0.791282	0.00119704		1.15965	0.563265	1.19919	1.30352	4.04085	27.3204	0.861457	8.466
PcyM_0122600	1.00048	2.36498	0.818521	0.732884	0.00110821	0	1.22922	0.000554104		0.0514765	0.144518	0	0.21005	0	0	0.0979974	0.0525125
PcyM_0122700	0.00768274	0.164176	0.0394849	0.114834	0	0	0.0815445	0		0.858716	0.0751354	1.04321	0.0106613	0.237956	15.2307	0.466926	4.13063
PcyM_0122800	1.91759	1.75348	0.233871	0.858029	0	0	1.19074	0		5.01538	2.41997	3.83215	1.27281	2.27269	25.4998	3.71767	8.21936
PcyM_0122900	0.0819266	0.0881442	0.0484386	0.289195	0	0	0.126926	0		0.0689583	0.254673	1.05623	0.294685	0	2.25772	0.161816	0.902159
PcyM_0123000	1.79483	0.519539	0.522087	2.77193	0	0	1.4021	0		0.313436	0	0	0	0	0	0.156718	0
PcyM_0123100	2.12997	0.0772696	0.102421	0.127082	0.00166204	0.00292789	0.609187	0.00229496		0	0.114809	0.266649	0	0.790692	0.985347	0.0574045	0.510672
PcyM_0123200	0.0145835	0.0480103	0.00885356	0.0240574	0	0	0.0238762	0		0.267079	0.915908	0.572718	0.411694	0.00933118	0.761355	0.591493	0.438775
PcyM_0123300	0.628249	0.206961	0.26551	0.882377	0	0	0.495774	0		0.10055	0	0.338826	0.644532	1.00472	0.794631	0.050275	0.695677
PcyM_0123400	0.0628864	0.305819	0.106456	0.245292	0.885248	0.00324891	0.180113	0.444248		4.34643	0.254794	22.4873	19.7533	57.9075	37.0754	2.30061	34.3058
PcyM_0123500	0.0442857	0.169017	0.181607	0.290711	0.00236528	0	0.171405	0.00118264		0.0760386	0	0.41505	0.280632	0.505484	0.819439	0.0380193	0.505151
PcyM_0123600	0.0585791	2.44006	0.135478	0.232839	0	0	0.716738	0		0	0	1.46739	1.46213	6.96196	18.4087	0	7.07505
PcyM_0123700	1.27586	1.19251	1.83705	1.3826	0	0	1.42201	0		0.0334136	0.0388124	0.0901436	0.0449103	0	0	0.036113	0.0337635
PcyM_0123800	0.384107	0.363011	0.630014	0.807822	0	0	0.546238	0		0.0173158	0	0	0	0	0	0.00865792	0
PcyM_0123900	0.0396795	0.0502612	0.109608	0.272303	0	0	0.117963	0		0	0	0	0	0.423914	0	0	0.105978
PcyM_0124000	0.0459514	0.605468	0.212789	0.806185	0	0	0.417598	0		0.418852	0	0.0102649	0	0	0	0.209426	0.00256622
PcyM_0124100	0.270191	0.317027	0.456344	1.05791	0	0	0.525367	0		0.107496	0.180776	0.263441	0.276989	0.0244119	0.83652	0.144136	0.350341
PcyM_0124200	0.050509	0.0507074	0.0320911	0.123497	0	0	0.0642012	0		0.0907648	0.0294688	0.179662	0	0.152214	5.12808	0.0601168	1.36499
PcyM_0200100	0.47258	1.06347	0.468079	1.14277	0	0	0.786723	0		0	0	0	0	0	0	0	0
PcyM_0200200	0.0123914	0.0303685	0.0518336	0.13392	0	0	0.0571284	0		0.179335	0.0920587	0.213811	0.852177	0	8.86472	0.135697	2.48268
PcyM_0200300	0.147981	0.827458	0.282862	0.325459	0	0.00102965	0.39594	0.000514824		0.0266683	0.33768	0.490173	0.195366	0.654077	6.50331	0.182174	1.96073
PcyM_0200400	0.0965945	0.0344872	0.0542376	0.0798729	0	0	0.0662981	0		0.40731	0.530375	1.03006	0.698352	0.0314889	3.09172	0.468843	1.2129
PcyM_0200500	0.00816519	0.38752	0.0232813	0.0144706	0	0	0.108359	0		0.0408583	0.538913	0.50066	0.299319	0.51961	1.56836	0.289885	0.721986
PcyM_0200600	0.56331	0.829131	0.544304	0.918202	0	0	0.713737	0		0	0	0.0890692	0	0	0	0	0.0222673
PcyM_0200700	0.606172	1.33466	0.382409	1.35715	0.00219173	0	0.920099	0.00109586		0.134513	0.0709681	0.329653	0.328472	0	0	0.102741	0.164531
PcyM_0200800	0.0185245	0.200721	0.598695	0.0443886	0	0.000454408	0.215582	0.000227204		0.346209	0.726503	1.1437	0.179937	1.51721	1.66554	0.536356	1.1266
PcyM_0200900	0.182294	0.290596	0.0976787	0.902974	0.0875328	0	0.368386	0.0437664		0.208917	0.188954	0.0731425	0.218641	0	2.83036	0.198936	0.780536
PcyM_0201000	0.0110172	0.0134303	0.0198154	0.069038	0	0	0.0283252	0		0.160752	0.0678491	0.63033	0.314036	0.175229	0.145188	0.1143	0.316196
PcyM_0201100	0.032876	0.12938	0.0363095	0.0402708	0	0	0.059709	0		0	0	0	0	0	18.9106	0	4.72764
PcyM_0201200	0.627605	2.05083	0.323907	1.42839	0	0	1.10769	0		0	0	0.588809	0	0	0	0	0.147202
PcyM_0201300	0.0242247	0.00726066	0.0119715	0.119422	0	0	0.0407196	0		0.0972657	0.052343	0.238371	0.417067	0.176709	0.219622	0.0748044	0.262942
PcyM_0201400	0.388308	0.361507	0.0148482	0.0772211	0	0	0.210471	0		0.0986437	0.338284	0.382767	0.391432	0	1.3364	0.218464	0.52765
PcyM_0201500	0.0105511	0.0197507	0.0243722	0.037518	0	0	0.023048	0		0	0.111075	0	0	0	0	0.0555374	0
PcyM_0201600	1.00558	1.36894	1.50049	1.29163	0	0	1.29166	0		0	0	0	0	0	0	0	0
PcyM_0201700	0.14047	0.113993	0.057195	0.135246	0	0	0.111726	0		0.0290398	0	0.214551	0.177283	0	0	0.0145199	0.0979585
PcyM_0201800	3.04383	2.26362	0.399803	0.925445	0	0.012602	1.65818	0.006301		0	0.614882	0.704265	0	0	0	0.307441	0.176066
PcyM_0201900	0.0082978	0.0289657	0.0381645	0.0164115	0	0	0.0229599	0		0.239386	0.196464	0.391112	0.227331	0.00166632	0.360349	0.217925	0.245114
PcyM_0202000	0.0223406	0.0125981	0.00822017	0.00923021	0	0	0.0130973	0		0.0852946	0.0900015	0.15778	0.130845	0.000624841	0	0.0876481	0.0723123
PcyM_0202100	0.190087	0.380955	1.14484	2.07023	0	0	0.946527	0		1.34695	0.636281	0.496594	3.84528	1.40705	0.104299	0.991615	1.46331
PcyM_0202200	0.14277	0	0.431471	0.126339	0	0.259159	0.175145	0.12958		0	0.00355321	0.268206	0	0	0	0.00177661	0.0670516
PcyM_0202300	0.570183	0.410449	0.172835	0.665341	0.551871	0	0.454702	0.275935		4.70417	3.37536	13.1426	14.4739	22.2206	62.4563	4.03977	28.0734
PcyM_0202400	2.92004	1.4607	0.968592	4.48647	0	0	2.45895	0		1.06872	0	1.30956	0	0.647204	0	0.534359	0.489191
PcyM_0202500	0.126961	0.109734	0.0188949	0.0905249	0.481125	0.129489	0.0865287	0.305307		18.5827	30.0613	68.3447	71.3045	60.0038	52.3508	24.322	63.001
PcyM_0202600	0.0989279	0.113771	0.0231843	0.0746671	0.135447	0.109361	0.0776376	0.122404		8.86697	19.3948	48.8935	74.205	117.967	33.3688	14.1309	68.6085
PcyM_0202700	0.106615	0.21417	0.0342576	0.113221	0	0	0.117066	0		3.50998	9.829	12.903	18.6257	17.9042	66.1466	6.66949	28.8949
PcyM_0202800	0.167828	0.119926	0.019068	0.0309552	0.000734659	0	0.0844444	0.000367329		0.383251	0.4044	1.16023	1.01845	0.204788	1.93434	0.393825	1.07945
PcyM_0202900	0.0790875	0.324347	0.0764165	0.147418	0	0	0.156817	0		20.3452	21.6755	33.3201	42.2771	29.8544	58.7484	21.0103	41.05
PcyM_0203000	0.179638	0.0268892	0.0158242	0.075922	0	0.00114689	0.0745683	0.000573444		23.102	25.6034	36.1419	30.6903	12.1426	79.2292	24.3527	39.551
PcyM_0203100	0.337642	0.158345	0.167195	0.536955	0.0113341	0	0.300034	0.00566707		5.13979	9.1342	17.2369	20.8127	37.8428	87.3462	7.137	40.8096
PcyM_0203200	0.385974	0.363895	0.612236	0.250677	0	0.142977	0.403195	0.0714884		0	0	0.591873	0	0	0	0	0.147968
PcyM_0203300	0.266279	1.46183	1.04204	1.34718	0	0.00986026	1.02933	0.00493013		0.666221	0.615113	1.12249	2.4403	6.95963	74.2747	0.640667	21.1993
PcyM_0203400	0.144271	0.120891	0.0224578	0.153706	0	0.0908811	0.110331	0.0454405		13.2021	11.1769	19.7513	22.6794	16.4549	46.7943	12.1895	26.42
PcyM_0203500	0.150603	0.0811605	0.0262579	0.150012	0	0.00098278	0.102008	0.00049139		3.48615	1.57651	11.8999	14.2896	13.3456	39.639	2.53133	19.7935
PcyM_0203600	11.5536	24.0647	0.865865	3.6522	0	0	10.0341	0		1.24566	0.788642	3.15452	4.10646	3.31918	16.3134	1.01715	6.72338
PcyM_0203700	0.0212947	0.0115684	1.67118	0.0316244	0.39888	0.442834	0.433916	0.420857		52.7011	48.3622	48.4957	44.7932	104.764	56.1972	50.5316	63.5626
PcyM_0203800	0.0848767	0.111269	0.00309408	0.0707858	0	0.0613434	0.0675064	0.0306717		6.7093	1.74939	11.7447	12.525	29.9319	30.8836	4.22934	21.2713
PcyM_0203900	0.186742	0.000420424	0.00802677	0.00702304	0	0	0.050553	0		27.6841	31.3947	29.1565	28.8983	45.2109	37.5058	29.5394	35.1929
PcyM_0204000	209.015	176.429	244.571	208.892	2.23382	1.42009	209.727	1.82695		199.488	280.068	226.89	169.036	421.343	26.8442	239.778	211.028
PcyM_0204100	0.344345	0.434871	0.330151	0.569426	0.895336	0.361453	0.419698	0.628394		44.2649	38.9767	50.6867	55.9096	109.814	64.7941	41.6208	70.301
PcyM_0204200	0.15688	0.142673	0.240891	0.485776	0.0546651	0.0220686	0.256555	0.0383669		8.20103	7.11955	10.8257	7.14576	4.46981	5.72361	7.66029	7.04123
PcyM_0204400	0.760026	0.378679	0.239337	1.1303	0	0	0.627085	0		5.23157	3.44061	4.26186	4.24658	5.52897	11.7799	4.33609	6.45433
PcyM_0204500	1.37715	0.566662	3.69042	15.6857	0.790056	0.844282	5.32998	0.817169		99.048	91.7776	73.9003	65.974	106.633	76.9253	95.4128	80.8581
PcyM_0204600	4.36236	0.0456089	0.0420726	0.487525	1.48501	1.07912	1.23439	1.28207		110.988	87.1936	77.7076	76.9059	99.7161	99.2556	99.0909	88.3963
PcyM_0204700	2.10696	1.60869	10.8797	1.11858	0.76796	0.963309	3.92847	0.865634		151.898	156.501	107.867	112.159	119.54	127.58	154.2	116.787
PcyM_0204800	7.23104	0.767558	15.7416	1.27656	0.395283	1.01066	6.2542	0.702973		143.267	139.275	111.861	109.924	174.556	131.88	141.271	132.055
PcyM_0204900	51.4287	43.8237	63.8269	21.2476	0.376022	1.06262	45.0817	0.71932		92.6098	94.9245	77.399	78.2695	100.314	66.1969	93.7672	80.5448
PcyM_0205000	0.605986	1.92591	0.00301414	0.586879	0.695914	0.713168	0.780448	0.704541		134.86	139.555	101.808	109.11	126.042	132.871	137.207	117.458
PcyM_0205100	0.942372	0.47129	0.110685	0.581108	0.647018	0.398027	0.526364	0.522523		75.8298	82.538	86.98	80.9605	34.5065	79.3204	79.1839	70.4419
PcyM_0205200	0.419034	0.684943	0.0562866	0.11659	0	0	0.319213	0		12.1125	18.1773	17.4807	19.3899	16.1374	18.866	15.1449	17.9685
PcyM_0205300	0.192646	3.44371	1.01997	0.222388	0.345651	0.279083	1.21968	0.312367		46.144	66.438	54.4618	52.4499	29.8688	64.3984	56.291	50.2947
PcyM_0205400	0.0287373	23.4655	0.0915053	0.247444	0.672042	1.08523	5.9583	0.878637		105.634	118.475	83.953	83.4656	207.107	70.365	112.054	111.223
PcyM_0205500	1.93166	0.912081	0.799351	1.88506	0	1.69546	1.38204	0.847728		58.7097	46.8399	24.565	40.2122	78.0454	22.6329	52.7748	41.3639
PcyM_0205600	0.0443203	0.00866959	0.00370634	0.0696381	0.118346	0.175183	0.0315836	0.146764		22.8389	26.4837	32.1228	31.2686	3.4211	15.975	24.6613	20.6969
PcyM_0205700	0.285082	0.384477	0.197657	1.67512	0.347157	0.672719	0.635584	0.509938		114.237	96.4099	88.7696	90.0539	118.539	99.2636	105.324	99.1565
PcyM_0205800	3.19156	1.55046	4.93968	3.31659	1.2113	1.15913	3.24957	1.18521		213.58	184.035	191.02	207.238	204.897	237.144	198.808	210.075
PcyM_0205900	0.596079	0.806313	0.123666	0.229442	0	0.323064	0.438875	0.161532		39.1544	51.8239	44.8019	44.9745	38.6655	22.1793	45.4891	37.6553
PcyM_0206000	0.398031	0.353816	1.48119	0.199659	1.10546	0.803913	0.608173	0.954688		177.287	165.263	127.083	133.083	166.294	111.414	171.275	134.469
PcyM_0206100	0.0592389	4.84992	0.197585	1.00864	0.355972	0.350289	1.52885	0.353131		44.4929	60.1479	53.411	54.4575	26.4332	49.3299	52.3204	45.9079
PcyM_0206200	119.03	0.0157419	27.1467	6.60142	0	0.00717124	38.1984	0.00358562		18.5819	24.5922	20.4836	13.4589	42.3418	17.7784	21.587	23.5157
PcyM_0206300	0.0418527	0.00273591	0.258144	0.0139073	0.238211	0.15112	0.0791598	0.194665		23.7745	44.3084	28.9047	26.6903	4.04734	22.5835	34.0414	20.5565
PcyM_0206400	14.6174	6.7897	5.08696	6.30305	1.8054	1.4577	8.19928	1.63155		196.103	201.752	187.604	190.152	202.613	216.83	198.928	199.3
PcyM_0206500	0.512372	0.857547	0.578858	3.40548	0.757941	0.308928	1.33856	0.533435		51.9442	48.8116	46.7146	36.6018	71.1302	55.7426	50.3779	52.5473
PcyM_0206600	0.0953867	0.82357	0.163514	0.224929	0.057134	0.207589	0.32685	0.132361		29.1629	28.0378	29.6473	23.4521	8.06929	25.6	28.6003	21.6922
PcyM_0206700	0.0908639	0.125917	4.13351	0.100847	0	0	1.11278	0		30.2184	29.6465	34.7992	27.5175	30.8467	32.4044	29.9324	31.392
PcyM_0206800	1.48451	0.0205685	1.6014	0.0213839	2.52129	1.06413	0.781966	1.79271		156.381	148.6	143.597	158.22	247.052	116.994	152.49	166.466
PcyM_0206900	10.3542	2.79742	0.744789	2.35138	1.7708	0.238294	4.06194	1.00455		50.3146	53.9406	74.4772	76.6676	47.5332	89.9777	52.1276	72.1639
PcyM_0207000	17.7507	0.902734	0.7616	1.40427	2.80535	0.125838	5.20482	1.4656		58.6665	68.6327	75.5339	78.1179	54.0774	49.4349	63.6496	64.291
PcyM_0207100	20.5158	0.464884	0.190668	0.356981	1.07658	0.144874	5.38208	0.610725		41.112	34.0849	46.3324	39.7388	28.4537	32.0482	37.5984	36.6433
PcyM_0207200	3.7957	2.3602	1.72055	4.49192	0.904386	0	3.09209	0.452193		38.8535	40.6722	63.8638	52.7098	28.5713	26.4581	39.7629	42.9007
PcyM_0207300	0.253528	1.95015	0.0976017	0.253077	0.187181	0.0755662	0.63859	0.131374		41.2287	39.8673	57.2481	44.5725	19.7113	38.0441	40.548	39.894
PcyM_0207400	0.0869391	0.142978	0.0344032	0.944174	0.987609	0.626536	0.302124	0.807072		126.144	133.643	125.29	133.035	102.909	155.543	129.893	129.194
PcyM_0207500	0.0425902	0.0634568	0.0745224	0.125681	0.138241	0.502278	0.0765625	0.320259		60.9924	43.9666	35.9248	41.3209	59.2581	21.0728	52.4795	39.3942
PcyM_0207600	0.218116	0.10833	0.12386	0.604812	0.714432	1.15368	0.26378	0.934058		57.7356	57.8333	44.7735	59.788	72.5789	27.5013	57.7844	51.1604
PcyM_0207700	0.493007	0.444045	8.52231	1.61212	0.468414	0.59432	2.76787	0.531367		141.915	125.916	106.705	108.644	173.929	122.611	133.916	127.972
PcyM_0207800	0.18891	0.314655	0.11477	0.34288	0.478591	0.483026	0.240304	0.480809		98.6431	107.798	91.7854	94.8376	170.17	85.4928	103.22	110.571
PcyM_0207900	0.262423	0.00994018	0.0468055	0.260122	0	0	0.144823	0		14.9741	15.6167	15.6259	15.5699	7.19103	25.6624	15.2954	16.0123
PcyM_0208000	2.13872	1.26403	0.357808	0.919592	1.1765	1.51622	1.17004	1.34636		201.771	200.612	151.452	160.083	235.284	171.189	201.192	179.502
PcyM_0208100	0.272105	0.217447	1.13154	0.180727	0.0898917	0.10887	0.450456	0.0993807		22.0098	17.1407	26.5902	44.6072	14.4777	51.3506	19.5753	34.2564
PcyM_0208200	1.06446	1.23041	0.239382	1.31845	0.59892	0.120894	0.963175	0.359907		27.5171	30.7595	92.178	139.834	142.279	35.7396	29.1383	102.507
PcyM_0208300	0.206272	7.21508	15.0313	0.372985	0.00342304	0	5.7064	0.00171152		7.24784	10.9729	18.6656	28.9236	45.8006	13.282	9.1104	26.6679
PcyM_0208400	0.226154	39.396	3.67436	0.295017	0.321989	0.493959	10.8979	0.407974		111.608	112.346	93.2452	106.485	147.039	85.0807	111.977	107.963
PcyM_0208500	0.00313958	0.00390579	0.174024	0.00771508	0.366191	0.0739169	0.0471961	0.220054		35.7092	60.1866	47.9894	46.0896	4.83995	42.2884	47.9479	35.3018
PcyM_0208600	0.250116	1.40676	0.0181934	0.0694133	0.727848	1.24064	0.43612	0.984246		171.705	190.675	180.817	184.867	252.797	209.946	181.19	207.107
PcyM_0208700	75.0285	186.168	74.9251	64.4919	1.89707	1.00354	100.153	1.45031		282.055	203.455	275.824	293.871	465.894	485.562	242.755	380.288
PcyM_0208800	2.88848	0.197251	11.2666	1.26877	0.562156	0.818752	3.90528	0.690454		128.73	114.906	103.446	117.016	163.667	132.261	121.818	129.097
PcyM_0208900	0.762256	0.300375	0.881032	0.733804	0.416145	0.313601	0.669367	0.364873		74.5772	91.0715	66.7574	66.7733	32.1109	77.8311	82.8243	60.8682
PcyM_0209000	0.0842242	0.208217	0.35922	0.0253986	0.579074	0.642884	0.169265	0.610979		109.457	97.2069	114.828	95.534	31.2374	76.5689	103.332	79.542
PcyM_0209100	94.1276	48.9395	30.7311	23.6255	9.31221	3.61939	49.3559	6.4658		519.627	446.837	421.722	477.911	805.309	436.021	483.232	535.241
PcyM_0209200	0.17025	0.106338	1.64245	17.2554	0.79899	0.524156	4.79362	0.661573		72.3289	70.5711	86.7927	73.9252	58.5259	85.8099	71.45	76.2634
PcyM_0209300	7.61523	7.69394	9.37149	5.72789	0.550566	0.329298	7.60214	0.439932		59.1074	64.1084	64.8067	54.2865	17.1891	59.7824	61.6079	49.0162
PcyM_0209400	0.308972	0.185771	0.0116467	1.03318	0.316647	0.237404	0.384893	0.277026		33.0064	32.8987	34.4738	32.3172	7.06129	15.7451	32.9525	22.3994
PcyM_0209500	1.14512	0.312955	0.181855	1.27091	0.140863	0.270475	0.727712	0.205669		23.9063	54.1508	30.0479	28.4924	6.05348	71.8868	39.0286	34.1202
PcyM_0209600	0.099759	0.097381	0.500407	1.11034	0.327769	0.264645	0.451972	0.296207		44.2384	50.5877	48.4247	48.7445	33.173	31.0186	47.4131	40.3402
PcyM_0209700	0.165879	0.0842039	0.0571946	0.211326	2.46344	1.10501	0.129651	1.78422		207.216	190.771	151.563	180.267	289.088	130.511	198.994	187.857
PcyM_0209800	2.31611	1.44392	1.76278	3.28483	1.12229	0.740021	2.20191	0.931153		104.422	122.593	92.4983	90.2166	134.745	97.5337	113.508	103.748
PcyM_0209900	0.168296	0.346015	0.112467	0.204902	0	0.251999	0.20792	0.126		65.5526	67.1489	66.2454	57.1696	96.6672	47.0957	66.3507	66.7945
PcyM_0210000	11.6622	0.750321	4.0534	9.64736	1.50307	0.825464	6.52832	1.16427		134.716	124.475	136.603	150.84	205.541	165.82	129.595	164.701
PcyM_0210100	0.322278	0.0657283	0.450272	0.671517	0.711366	0.574366	0.377449	0.642866		75.6752	82.4106	68.9524	86.079	158.636	123.804	79.0429	109.368
PcyM_0210200	6.26398	177.921	59.385	8.76217	1.66471	2.24019	63.0831	1.95245		200.459	175.887	226.275	263.811	453.386	204.206	188.173	286.92
PcyM_0210300	14.5364	0.136395	0.623301	0.0504812	0.62242	0.345503	3.83665	0.483961		53.692	59.846	63.2077	56.066	25.7841	102.726	56.769	61.9459
PcyM_0210400	13.8145	0.145836	0.232093	5.44696	0	0.267691	4.90984	0.133845		19.8955	29.1046	27.7036	33.1251	50.111	13.2728	24.5001	31.0531
PcyM_0210500	5.35182	0.194102	0.241981	0.484714	0	1.05488	1.56815	0.527442		95.0407	106.553	112.81	128.36	206.104	60.3506	100.797	126.906
PcyM_0210600	3.32513	1.67972	2.41322	6.60186	0	0	3.50498	0		2.52731	2.28581	2.65445	3.9674	3.93561	0	2.40656	2.63937
PcyM_0210700	10.3104	0.287528	0.0971426	1.04586	0.970103	1.91561	2.93523	1.44286		125.548	145.451	176.838	197.538	323.326	204.575	135.499	225.569
PcyM_0210800	12.8218	42.3853	5.06352	17.2564	0	0	19.3817	0		2.35965	7.96758	8.67425	5.76211	15.433	6.3936	5.16362	9.06574
PcyM_0210900	0.139953	0.210463	0.141053	0.572111	0.113941	0.168663	0.265895	0.141302		42.1865	54.7265	36.2114	33.1196	20.3774	31.8135	48.4565	30.3805
PcyM_0211000	0.0120037	0.0050099	1.71372	0.239463	0.160054	0.452304	0.492549	0.306179		14.6254	32.7666	31.3623	34.9146	20.0274	36.4737	23.696	30.6945
PcyM_0211100	0.0352613	0.0794522	0.00540024	0.00280498	0.0844918	0.1137	0.0307297	0.0990957		24.2952	40.0244	34.4984	28.8194	3.69858	25.8892	32.1598	23.2264
PcyM_0211200	0.200021	6.93267	3.03721	1.52198	1.19911	0.376514	2.92297	0.787812		121.474	128.226	99.6981	113.594	198.74	133.962	124.85	136.499
PcyM_0211300	0.0709611	0.0919056	0.0381588	0.0394675	0.691179	0.494509	0.0601232	0.592844		95.3613	94.7104	92.7513	90.6547	33.9104	40.1735	95.0358	64.3725
PcyM_0211400	0.0403349	18.8863	1.80594	0.237992	0	0.226984	5.24265	0.113492		40.4882	53.4939	64.4896	71.0558	96.9718	60.3238	46.991	73.2102
PcyM_0211500	0.152491	0.00409092	0.00439904	1.82154	0.69429	0.58214	0.49563	0.638215		105.155	113.655	98.0006	110.411	94.0232	73.5168	109.405	93.988
PcyM_0211600	2.04613	49.9743	10.7912	0.825955	0.521715	0.557523	15.9094	0.539619		80.8016	70.9512	85.3299	100.044	111.933	92.9717	75.8764	97.5697
PcyM_0211700	3.0197	0.045119	0.196753	0.874803	1.67799	1.3004	1.03409	1.48919		260.974	195.201	261.789	262.272	273.958	209.787	228.088	251.952
PcyM_0211800	0.0541552	0.0773061	0.852199	0.0335863	0.649997	0.787224	0.254312	0.718611		130.592	142.729	183.947	196.344	158.479	135.313	136.661	168.521
PcyM_0211900	0.0122425	0.0646091	0.00835242	0.00711166	0.133638	0.368663	0.0230789	0.251151		35.2915	56.9268	34.9615	30.2	6.1542	42.1829	46.1092	28.3747
PcyM_0212000	0.116803	0.169975	0.0395093	0.0862573	0.0252105	0	0.103136	0.0126053		10.6981	20.5712	10.8068	17.0106	22.7691	50.3082	15.6347	25.2237
PcyM_0212100	0.42483	10.2708	0.313776	0.728588	0.295767	0.357598	2.93451	0.326683		56.329	49.3801	53.6303	46.2836	17.8398	50.604	52.8545	42.0894
PcyM_0212200	1.71847	9.9899	0.616101	5.48217	0.249553	0.528917	4.45166	0.389235		81.3582	86.5063	77.7803	69.8137	110.915	96.6868	83.9323	88.7989
PcyM_0212300	0.356129	17.3094	0.200151	0.926318	0	0.355077	4.698	0.177538		30.3889	44.8289	78.8841	100.327	146.196	56.8797	37.6089	95.5717
PcyM_0212400	0.796828	0.117799	51.4464	0.330349	0.390411	0.748655	13.1728	0.569533		184.853	172.206	244.182	293.934	363.244	218.063	178.529	279.856
PcyM_0212500	0.00191227	0.154816	0.00300462	0.029381	0.792843	1.09359	0.0472784	0.943218		137.786	124.962	114.622	111.59	130.613	64.7524	131.374	105.394
PcyM_0212600	48.6467	45.928	22.2834	2.61202	2.2265	1.69196	29.8675	1.95923		147.126	142.539	126.621	125.295	178.323	135.114	144.832	141.338
PcyM_0212700	0.311835	0.0871998	0.165205	0.474422	1.85414	0.58219	0.259666	1.21817		119.695	117.109	138.062	141.341	209.036	89.2164	118.402	144.414
PcyM_0212800	1.16834	0.279216	0.244818	8.00662	0.819637	0.876867	2.42475	0.848252		230.866	182.995	178.593	215.6	251.385	147.217	206.93	198.199
PcyM_0212900	0.207026	1.06279	0.47522	3.07319	0	0	1.20456	0		18.4635	12.6509	14.3974	11.4181	20.0393	4.87285	15.5572	12.6819
PcyM_0213000	94.2628	0.104361	3.653	0.822352	0.06857	0.110729	24.7106	0.0896493		27.9154	26.3968	32.0291	33.6841	22.9368	32.8357	27.1561	30.3714
PcyM_0213100	124.017	4.33762	30.9626	43.9495	0	0	50.8168	0		10.1826	13.6226	10.8137	6.63075	33.2991	12.2624	11.9026	15.7515
PcyM_0213200	2.56089	0.106199	13.5613	3.96351	0	0.195918	5.04798	0.0979588		23.1156	24.4539	35.7587	18.5469	11.5397	39.1024	23.7847	26.2369
PcyM_0213300	0.0516381	0.170437	0.00425454	0.384103	0.541755	0.435485	0.152608	0.48862		37.4124	42.0707	33.6664	28.6508	41.6963	48.8322	39.7415	38.2114
PcyM_0213400	30.05	41.7296	10.248	8.21951	3.58846	0.748221	22.5618	2.16834		130.743	131.625	155.204	149.304	122.624	126.8	131.184	138.483
PcyM_0213500	0.166902	2.60733	0.329665	80.2053	0	0.272721	20.8273	0.13636		19.9239	40.3454	23.426	22.4984	45.6126	25.4841	30.1347	29.2553
PcyM_0213600	0.198579	2.80441	2.07696	0.598658	0.189376	0.398645	1.41965	0.294011		34.8757	65.9471	36.3394	34.8766	18.3002	55.1111	50.4114	36.1568
PcyM_0213700	0.599368	0.539709	0.0948215	0.342839	1.10402	1.40938	0.394185	1.2567		277.378	288.806	334.789	397.436	328.819	161.056	283.092	305.525
PcyM_0213800	0.0943932	0.00466122	0.0319994	0.0464076	0.0863569	0.174314	0.0443654	0.130336		34.2884	24.9805	48.2749	45.3888	27.8702	37.2311	29.6345	39.6913
PcyM_0213900	56.3296	16.0317	8.55173	26.5573	0.919609	0.367173	26.8676	0.643391		14.575	21.2692	25.0794	29.1544	37.1838	22.4066	17.9221	28.4561
PcyM_0214000	0.0224796	0.040288	0.0331975	2.07389	0.306298	0.54408	0.542463	0.425189		64.1236	64.18	64.5999	69.2648	43.6393	25.9393	64.1518	50.8608
PcyM_0214100	0.355792	0.925906	0.320245	1.14027	0	0	0.685554	0		16.3078	22.6984	33.7211	30.3909	5.4577	26.4055	19.5031	23.9938
PcyM_0214200	0.0913578	0.993864	0.658901	0.149337	0.599971	0.571595	0.473365	0.585783		63.3233	68.4573	66.0336	58.4818	23.361	56.1544	65.8903	51.0077
PcyM_0214300	17.8498	0.0429388	0.763648	2.04271	0.214795	0.322081	5.17476	0.268438		35.907	36.9611	35.3837	30.0194	10.7584	34.8213	36.434	27.7457
PcyM_0214400	0.291176	0.0921362	30.3543	0.0934555	0.283048	0.328521	7.70776	0.305785		49.3641	75.561	52.4303	43.9225	61.2791	50.2832	62.4626	51.9788
PcyM_0214500	0.411171	3.7972	3.12054	0.424894	0	0.236033	1.93845	0.118016		47.3846	52.7197	59.8651	54.3155	14.1476	44.9275	50.0521	43.3139
PcyM_0214600	0.157674	0.0243417	0.217051	0.293691	0	0.280912	0.17319	0.140456		9.49009	11.5159	14.2452	14.7735	6.46549	4.82135	10.503	10.0764
PcyM_0214700	0.127865	0.215742	0.127661	0.287192	0.516714	0.317642	0.189615	0.417178		74.3479	84.5855	80.0927	69.0502	64.3357	41.7918	79.4667	63.8176
PcyM_0214800	0.0575245	0.0835167	3.56531	0.00780756	0.312705	0.550871	0.928539	0.431788		92.3722	86.8909	91.0507	86.1515	30.8167	63.8192	89.6315	67.9595
PcyM_0214900	4.55438	3.24603	4.43398	6.05489	2.17133	2.7335	4.57232	2.45241		565.086	402.108	376.529	368.715	586.679	302.636	483.597	408.64
PcyM_0215000	0.127045	7.63176	4.04451	1.27226	0.135212	0.218344	3.26889	0.176778		37.6884	51.6144	52.2264	46.1594	11.2653	49.9143	44.6514	39.8913
PcyM_0215100	0.417775	0.0475013	12.4472	0.168072	0.35004	0.494597	3.27014	0.422318		71.451	68.5724	74.8052	83.0618	106.139	122.752	70.0117	96.6894
PcyM_0215200	0.150221	0.121781	0.372997	0.160793	0.748033	0.589592	0.201448	0.668813		129.574	107.293	104.772	100.09	78.9801	114.137	118.434	99.4948
PcyM_0215300	50.6418	21.3929	14.0593	8.3141	0.766372	0.338855	23.602	0.552613		84.4508	77.5264	69.9082	65.7785	40.7814	80.2979	80.9886	64.1915
PcyM_0215400	4.07809	8.39429	8.00549	14.4026	0.184589	0.214244	8.72011	0.199416		43.1438	48.978	53.3968	48.6811	11.0055	38.2278	46.0609	37.8278
PcyM_0215500	1.26762	4.38149	1.67959	1.09806	0.126152	0.12062	2.10669	0.123386		37.8599	42.6471	36.3717	24.5559	13.9492	24.8921	40.2535	24.9422
PcyM_0215600	1.46309	61.0991	19.4785	16.965	0.402121	0.501775	24.7514	0.451948		105.861	116.247	77.7774	75.2136	102.139	91.0741	111.054	86.5509
PcyM_0215700	0.352962	10.4579	0.0902201	0.0834806	0.468754	0.354823	2.74614	0.411788		46.5097	60.2211	64.8268	72.7885	47.1124	90.1305	53.3654	68.7145
PcyM_0215800	0.306793	0.6509	0.813123	0.085752	1.39469	0.460673	0.464142	0.927681		81.1437	74.8121	70.7798	75.4796	144.832	85.9015	77.9779	94.2481
PcyM_0215900	0.12623	0.65728	0.0498842	0.130213	0	0.296146	0.240902	0.148073		64.0302	56.129	49.7185	57.2089	97.849	51.9576	60.0796	64.1835
PcyM_0216000	0.102417	0.139448	0.370908	0.590691	0.400151	0.586247	0.300866	0.493199		107.89	102.889	103.536	96.6354	49.5646	86.9793	105.39	84.1787
PcyM_0216100	16.3187	19.1581	7.83896	19.6428	0.0257659	0.150936	15.7396	0.0883507		53.7953	58.4453	49.0483	51.5185	36.129	28.7838	56.1203	41.3699
PcyM_0216200	0.00290906	1.45115	0.0126867	0.100516	0.28896	0.408293	0.391815	0.348627		51.4626	52.8124	58.4604	49.6417	61.0974	65.3303	52.1375	58.6324
PcyM_0216300	1.32518	1.23896	0.118547	0.502894	0.468986	0.377501	0.796396	0.423243		40.0663	49.6721	50.7653	42.0051	18.9694	9.75009	44.8692	30.3725
PcyM_0216400	0.109149	129.707	4.63197	0.425559	0.67082	0.604124	33.7185	0.637472		58.6237	48.6776	48.9392	49.4083	18.6673	80.3277	53.6507	49.3356
PcyM_0216500	0.759319	0.0612173	0.12601	0.359458	0.629601	0.302588	0.326501	0.466094		71.4442	65.3877	68.6386	67.0488	68.1581	65.0442	68.4159	67.2224
PcyM_0216600	13.362	1.1871	3.35855	18.1473	1.86648	1.92024	9.01375	1.89336		358.037	291.18	281.766	297.423	499.424	299.166	324.609	344.445
PcyM_0216700	0.0140715	2.21339	1.45077	0.119539	0.17193	0.373151	0.949442	0.27254		44.7462	43.9211	47.5173	49.1538	19.5944	54.137	44.3336	42.6006
PcyM_0216800	19.2716	4.56646	2.37877	1.49132	0.313027	0.577697	6.92703	0.445362		87.6281	67.0735	81.1414	71.8884	21.2464	80.5259	77.3508	63.7005
PcyM_0216900	60.038	1.31224	1.48753	7.405	0.216953	0.412902	17.5607	0.314927		46.0228	45.8293	43.5086	39.6883	19.7747	35.6515	45.926	34.6558
PcyM_0217000	1.1547	34.9295	1.00155	1.43047	0.589352	0.469902	9.62907	0.529627		75.0841	87.5212	87.6009	68.1579	37.4565	78.3136	81.3027	67.8822
PcyM_0217100	0.10738	0.136132	0.107071	0.120681	0.0469678	0.369744	0.117816	0.208356		45.6313	49.3758	41.4833	35.8061	34.3609	28.7111	47.5036	35.0904
PcyM_0217200	0.149145	0.0177076	0.0257138	0.02968	1.4341	1.79476	0.0555615	1.61443		290.453	228.878	195.376	217.442	351.076	205.624	259.666	242.38
PcyM_0217300	0.0142062	21.7741	0.081522	4.00982	0.080046	0.033267	6.46991	0.0566565		15.6934	23.3414	16.4039	16.5376	27.9015	14.9185	19.5174	18.9404
PcyM_0217400	5.2451	105.762	11.2356	21.6504	0.688988	0.494487	35.9732	0.591738		37.9532	33.712	46.3134	50.6743	42.42	51.9828	35.8326	47.8476
PcyM_0217500	0.0124775	0.0294632	1.10621	0.145066	1.21624	1.04748	0.323304	1.13186		128.776	116.829	116.467	113.282	178.958	139.705	122.803	137.103
PcyM_0217600	2.93761	12.8901	1.44792	1.7654	0.15043	0.303649	4.76026	0.22704		67.2938	59.1019	51.6674	45.2776	102.875	44.4818	63.1979	61.0755
PcyM_0217700	6.42998	5.0402	0.115028	0.192458	0	0.151161	2.94442	0.0755806		13.0286	10.777	11.2636	9.35266	6.03051	8.0715	11.9028	8.67956
PcyM_0217800	6.19821	16.0373	11.6338	8.63544	0.16936	0.419999	10.6262	0.294679		52.0451	69.5322	58.1246	58.0862	105.375	76.2576	60.7886	74.4608
PcyM_0217900	0.0916598	0.193705	0.431442	0.0809845	0.0878972	0	0.199448	0.0439486		11.9953	26.8923	63.9019	76.4105	69.2637	43.1735	19.4438	63.1874
PcyM_0218000	62.5128	1.29961	1.47895	37.8299	0.273204	0.79228	25.7803	0.532742		125.001	125.702	121.402	113.888	69.2739	110.495	125.351	103.765
PcyM_0218100	0.417956	0.13211	11.2828	3.65061	0.493219	0.521231	3.87087	0.507225		120.767	132.541	109.427	118.198	264.398	130.356	126.654	155.595
PcyM_0218200	6.95263	23.0727	5.49086	7.34178	3.44334	1.01941	10.7145	2.23137		164.993	167.823	134.848	138.282	312.268	121.944	166.408	176.835
PcyM_0218300	0.0860449	0.410507	0.00476728	0.00231885	0.19092	0.175172	0.12591	0.183046		39.7424	62.2757	35.0005	36.826	16.1486	65.4484	51.009	38.3559
PcyM_0218400	0.692113	0.601613	1.21653	3.84397	1.61748	0.995029	1.58856	1.30626		149.588	137.281	113.564	112.323	109.737	188.094	143.434	130.93
PcyM_0218500	0.0019721	0.0219938	0.0183472	2.28492	0.457526	0.605426	0.581808	0.531476		64.9215	65.6602	71.8316	46.5909	18.8313	65.4773	65.2909	50.6828
PcyM_0218600	1.69829	2.33237	2.09461	0.284794	0.450055	0.726761	1.60252	0.588408		134.014	106.219	104.337	98.2802	78.597	127.738	120.117	102.238
PcyM_0218700	7.0432	19.7487	0.971684	0.0976856	0.276482	0.390661	6.96531	0.333571		85.5037	86.734	78.203	78.4039	67.8524	103.555	86.1189	82.0036
PcyM_0218800	2.58235	1.84727	1.29576	6.11614	1.0389	1.63571	2.96038	1.3373		254.405	252.14	214.032	232.597	389.689	300.735	253.273	284.263
PcyM_0218900	41.877	29.1939	4.13139	6.32041	0.841875	0.584611	20.3807	0.713243		98.7181	83.4435	101.995	113.323	165.516	119.47	91.0808	125.076
PcyM_0219000	0.485615	0.599244	0.413488	0.982807	0	0.130759	0.620288	0.0653794		38.8735	40.9022	46.822	44.5237	56.9808	85.7798	39.8878	58.5266
PcyM_0219100	1.49423	49.6783	0.0455177	1.5592	0.380961	0.184556	13.1943	0.282758		36.5129	30.455	33.8357	32.0045	33.4156	36.5443	33.484	33.95
PcyM_0219200	0.127441	0.449855	0.117524	12.3063	1.04183	0.504712	3.25028	0.77327		72.3591	68.2184	52.7555	56.2963	60.1475	47.4831	70.2887	54.1706
PcyM_0219300	0.00811455	0.00109524	0.0127196	0.160173	0.200888	0.393913	0.0455255	0.297401		59.8125	59.0383	53.9095	43.7027	10.3463	33.7599	59.4254	35.4296
PcyM_0219400	13.5395	22.8792	0.26907	1.08923	0.933139	0.58301	9.44424	0.758075		103.873	81.5646	82.8372	83.9091	73.4927	73.6534	92.7189	78.4731
PcyM_0219500	0.124985	0.657162	0.339832	0.467692	0.28274	0.470844	0.397418	0.376792		85.1361	76.6296	77.4187	65.0396	43.8733	63.6428	80.8828	62.4936
PcyM_0219600	0.649058	0.39082	0.213422	0.278332	0	0.143253	0.382908	0.0716267		15.0026	13.5325	24.0172	28.9537	39.5656	10.3811	14.2676	25.7294
PcyM_0219700	6.32527	0.423352	6.82368	1.30233	0.0998583	0.316749	3.71866	0.208303		58.0127	64.2978	44.8801	38.6019	85.8489	45.8197	61.1552	53.7876
PcyM_0219800	0.318721	1.06213	0.564064	1.1185	0	0.659547	0.765853	0.329774		0.247915	0.966659	1.24728	4.47413	0.0387058	2.79503	0.607287	2.13879
PcyM_0219900	3.23352	1.45544	9.75638	6.22201	0.0345612	0	5.16684	0.0172806		0	0.086084	0	0	0	0	0.043042	0
PcyM_0220000	3.18194	0.253112	4.55042	4.2531	0	0	3.05964	0		0	0	0	0	0	0	0	0
PcyM_0220100	0.00969405	0.57012	0.0210586	0.0434391	0	0	0.161078	0		6.65147	1.47758	10.0808	12.6092	34.3445	20.1732	4.06452	19.3019
PcyM_0220200	0.0503974	0.132203	0.0519457	0.0714245	0.136573	0.00204205	0.0764926	0.0693075		17.9745	21.8177	56.1516	73.1163	81.7235	15.9868	19.8961	56.7446
PcyM_0220300	0.316868	0.242475	0.0695794	0.119682	0.28429	0	0.187151	0.142145		6.3975	11.2534	59.3287	49.7088	67.6235	96.7488	8.82546	68.3525
PcyM_0220400	0.0220646	0.0300086	0.0160482	0.0239998	0	0	0.0230303	0		1.39818	3.58295	6.05762	4.93847	4.44529	10.0348	2.49056	6.36905
PcyM_0220500	0	0.151186	0.0434311	0.0965744	0	0.0428463	0.072798	0.0214232		6.73598	20.543	28.2016	42.9902	87.3075	21.4077	13.6395	44.9767
PcyM_0220600	0.108524	0.270895	0.094669	0.090771	0	0	0.141215	0		0	0.0025736	0	0	0	0	0.0012868	0
PcyM_0220700	0.0571314	0.00900979	0.00432196	0.0083045	0	0	0.0196919	0		8.21447	0.50248	10.9409	17.9515	37.7421	24.4618	4.35848	22.7741
PcyM_0220800	0.671694	0.0447741	0.0341215	0.103294	0	0.000470512	0.213471	0.000235256		0.238431	0.441513	1.53385	2.11059	1.73269	0	0.339972	1.34428
PcyM_0220900	0.121914	0.041399	0.0362201	0.0481722	0	0.0362478	0.0619264	0.0181239		0.918423	0.193821	0.675238	1.27088	1.00114	16.5901	0.556122	4.88434
PcyM_0221000	0.202216	0.0124965	0.0126941	0.0225559	0	0	0.0624906	0		0	0	0.152017	0.530153	0.225388	0.280121	0	0.29692
PcyM_0221100	0.156345	0.801639	0.283908	0.315065	0.000994303	0.00039268	0.389239	0.000693491		0.0305117	0	0.33649	0.223523	0	0	0.0152559	0.140003
PcyM_0221200	0	0.00740462	0.0138951	0.0140278	0	0.00674805	0.00883188	0.00337403		0.409261	0.104239	0.484198	1.20616	2.6921	0	0.25675	1.09561
PcyM_0221300	0.661197	0.886847	10.2172	4.66463	0.390378	0	4.10747	0.195189		2.39587	2.27676	3.9395	3.60489	1.01125	4.20761	2.33632	3.19081
PcyM_0221400	0.0581604	0.105678	3.25103	0.282011	0	0	0.92422	0		4.43255	5.08036	7.03785	7.2782	3.05456	16.5658	4.75646	8.4841
PcyM_0221500	0.23785	0.312413	0.38613	0.83715	0	0.137312	0.443386	0.0686558		10.295	10.5127	20.0756	22.9771	4.42452	21.496	10.4039	17.2433
PcyM_0221600	0.00144199	0.0125636	0.0119938	0.0175721	0	0	0.0108929	0		0	0.0812947	0.251748	0	0	0.0579867	0.0406473	0.0774336
PcyM_0221700	0.0168586	0.0265995	0.0322039	0.123006	0	0	0.049667	0		0	0	0	0.506383	0	25.2846	0	6.44774
PcyM_0221800	0.0335559	0.0484445	0.0536633	0.186967	0	0	0.0806576	0		0.134811	0.160032	0.371682	0.0823	0	0.799045	0.147422	0.313257
PcyM_0221900	0.0143953	0.0799357	0.0647068	0.092263	0	0	0.0628252	0		0.015599	0.11061	0	0.22398	0	0.355038	0.0631047	0.144754
PcyM_0222000	0.560765	1.61865	1.04702	0.851856	0	0	1.01957	0		0.190339	0	0.218656	0	0.0202619	0	0.0951696	0.0597296
PcyM_0222100	0.0841032	0.0680729	0.0898876	0.107492	0.00357707	0	0.087389	0.00178853		0.159163	0.104243	0.860831	1.01305	1.95434	3.64341	0.131703	1.86791
PcyM_0222200	0.364589	2.01819	0.741778	0.808519	0	0.00404619	0.983269	0.00202309		0.288194	0.221162	1.06234	0.415852	0.666377	0	0.254678	0.536143
PcyM_0222300	0.187198	1.01774	0.237931	0.643735	0	0	0.521651	0		3.68745	4.52361	6.07969	5.60036	5.0186	2.88658	4.10553	4.89631
PcyM_0222400	0	0.11184	0.230362	0.984792	0	0	0.331749	0		0.141966	0.149801	0.637851	0.115557	0	0.106851	0.145883	0.215065
PcyM_0222500	0.17146	0.0745041	0.0921613	0.169073	0	0	0.1268	0		0.027003	0.0119671	0	0.0164849	0	0	0.0194851	0.00412122
PcyM_0222600	0.1763	0.112876	0.0775137	0.804979	0	0.00459387	0.292917	0.00229694		0	0.106444	0.329628	1.47801	0.36654	0	0.0532219	0.543544
PcyM_0222700	0.22729	0.8889	0.399158	1.74773	0	0	0.815769	0		0.764329	0.492642	1.27129	2.46921	0	3.05555	0.628485	1.69901
PcyM_0222800	0.510752	1.04492	0.28035	0.323933	0	0	0.539989	0		0	0	0	0	0	0	0	0
PcyM_0300100	0.144822	0.093762	0.0280171	0.0968111	0	0	0.0908532	0		0.258013	0.369935	0.356344	0.299487	0.462403	1.47577	0.313974	0.648502
PcyM_0300200	0.586314	0.328141	0.254639	0.71927	0	0	0.472091	0		1.29203	1.22378	1.82418	1.31946	1.27869	0.687609	1.2579	1.27748
PcyM_0300300	0.0113104	0.149214	0.0321391	0.0459565	0.00300727	0	0.0596551	0.00150363		0.992039	0.486876	4.25532	2.56302	1.74842	3.71594	0.739457	3.07067
PcyM_0300400	0.434491	0.0291691	0.45144	0.432952	0	0	0.337013	0		0	0	0.0291512	0	0	0	0	0.00728779
PcyM_0300500	0.11082	3.79389	0.193185	0.226396	0	0	1.08107	0		0	0	0	0	0	0	0	0
PcyM_0300600	0.118642	0.215508	0.186273	0.361359	0.0178366	0	0.220445	0.00891832		0.0421035	0.0137512	0.0291606	0.0290561	0.100169	0	0.0279273	0.0395963
PcyM_0300700	0.00626443	0.0695422	0.0234023	0.0257013	0	0	0.0312276	0		0	0	0	0	0	0	0	0
PcyM_0300800	1.91197	1.31111	0.426849	0.756436	0	0	1.10159	0		0	0	0	0	0	0	0	0
PcyM_0300900	0.29491	0.629279	0.298451	0.347011	0	0	0.392412	0		0	0	0	1.39831	0.0297237	0	0	0.35701
PcyM_0301000	0.51828	1.30676	6.4196	4.94932	0	0	3.29849	0		0	0	0	0	0	0	0	0
PcyM_0301100	0.0603362	0.151768	0.129807	0.312561	0	0.00224059	0.163618	0.0011203		0.0155594	0	0.171592	0	0	0	0.00777969	0.0428981
PcyM_0301200	0.138108	0.102629	0.236498	0.395654	0	0	0.218223	0		0	0	0.0100433	0	0	0	0	0.00251082
PcyM_0301300	0.806232	2.69084	1.06369	1.53904	0	0	1.52495	0		0.118157	0.124677	1.01775	0.0721328	0.00258631	0	0.121417	0.273117
PcyM_0301400	0.0064189	0.0295845	0.0114641	0.0207403	0	0	0.017052	0		0.0746798	0.0776938	0.126819	0.233654	0.187479	1.93151	0.0761868	0.619865
PcyM_0301500	0	0.08478	0.105035	0.127398	0	0	0.0793034	0		0	0	0.0135618	0	0.0108915	0	0	0.00611333
PcyM_0301600	0.478014	1.35503	0.16158	0.192407	0	0	0.546758	0		0	0	0	0.00858375	0.0255449	0	0	0.00853215
PcyM_0301700	2.22208	0.904067	0.510669	1.19399	0	0	1.2077	0		0.00335928	0.446628	0	0	0	0	0.224994	0
PcyM_0301800	0.251626	0.889759	0.148429	0.610073	0	0	0.474972	0		0.453978	2.15564	0.834429	0.277146	0	0	1.30481	0.277894
PcyM_0301900	0.302936	0.853122	0.135934	0.403481	0.00163899	0	0.423868	0.000819496		0	0	0.403193	0	0	0.00260505	0	0.10145
PcyM_0302000	0.982026	3.91468	0.820936	0.497512	0	0.000499694	1.55379	0.000249847		0	0	0	0	0	0.263008	0	0.065752
PcyM_0302100	0.807992	2.06433	0.184064	0.935733	0	0	0.998029	0		0.16644	0	0.122369	0.0406434	0	0	0.0832199	0.0407531
PcyM_0302200	0.352114	0.317065	0.734556	1.24072	0	0	0.661114	0		0	0	0.00808351	0	0	0	0	0.00202088
PcyM_0302300	0.251519	0.357618	0.075148	0.270386	0	0	0.238668	0		0	0	0	0.161646	0.00559362	0	0	0.0418099
PcyM_0302400	0.0782011	0.00860302	0.0111989	0.0780682	0	0	0.0440178	0		0.0760028	0	0.558784	0.0927968	0	0	0.0380014	0.162895
PcyM_0302500	0.0758955	0.346454	0.022828	0.0666208	1.08096	0.187025	0.12795	0.633993		23.4829	18.0563	23.7426	17.6145	11.675	51.7514	20.7696	26.1959
PcyM_0302600	0.0178392	0.2119	0.0486001	0.184359	0.178469	0	0.115675	0.0892346		22.2715	19.0059	17.4481	16.9893	26.9748	32.4263	20.6387	23.4596
PcyM_0302700	0.176972	0.0843214	0.126185	0.210444	0.00674524	0.00556997	0.149481	0.00615761		11.393	13.9827	14.0133	14.0428	13.7258	31.3138	12.6878	18.2739
PcyM_0302800	0.351262	2.26106	0.424322	0.807617	0	0.180368	0.961066	0.0901839		8.84732	8.70263	9.37115	10.253	9.53515	16.9296	8.77498	11.5222
PcyM_0302900	0.0996267	0.485499	0.301233	0.750051	0	0	0.409102	0		13.9738	14.4133	15.7451	14.9043	9.62959	21.3974	14.1935	15.4191
PcyM_0303000	2.09368	0.712075	0.640536	0.303669	0	0	0.93749	0		0.33215	0.934612	1.22923	0.946269	0.0309457	5.78831	0.633381	1.99869
PcyM_0303100	0.0069774	0.0263525	0.0592617	0.0702172	0	0	0.0407022	0		0.0132171	0	0.68022	1.01667	0	15.0412	0.00660856	4.18453
PcyM_0303200	0.00581747	0.023186	0.0121835	0.0459357	0	0	0.0217807	0		0.749215	0	0	0	0.0234681	0	0.374608	0.00586703
PcyM_0303300	0.00432084	0.148736	0.0266095	0.0631158	0.00721031	0	0.0606956	0.00360516		0	0	1.35561	0	0	0	0	0.338903
PcyM_0303400	0.0853064	0.0049036	0.00756268	0.0230557	0	0	0.0302071	0		0.372489	0	0.00894966	0	0	2.5232	0.186245	0.633037
PcyM_0303500	0.0500699	0.0853427	0.0413528	0.179254	0	0	0.0890048	0		0	0.197531	3.21142	0.685694	3.06089	66.3623	0.0987653	18.3301
PcyM_0303600	1.27166	0.829844	0.143875	0.426882	0	0	0.668064	0		11.1324	20.9311	54.0968	75.7905	122.441	18.6111	16.0318	67.7349
PcyM_0303700	0.455977	0.420494	0.204255	0.455951	0	0	0.384169	0		6.57249	4.20032	11.2188	12.1538	28.9277	48.5359	5.38641	25.2091
PcyM_0303800	0.0982918	0.122329	0.0960026	0.0769413	0	0	0.0983911	0		0	0	0	0	0	16.186	0	4.0465
PcyM_0303900	0.560177	2.75961	5.28152	1.25538	0	0	2.46417	0		0.0532612	0.281002	0.130528	0.013006	0	0.962093	0.167132	0.276407
PcyM_0304000	0.0149286	0.0170065	0.0127095	0.029211	0	0	0.0184639	0		0.0878057	0.00102946	0.430374	0	0	0	0.0444176	0.107593
PcyM_0304100	0.261642	0.318507	0.34754	0.200398	0	0	0.282022	0		0.399327	0.00951218	0.872653	0.374226	0	4.26349	0.20442	1.37759
PcyM_0304200	0.314255	0.707653	0.313143	1.56809	0	0	0.725786	0		0	0	0	0.190642	0	0	0	0.0476606
PcyM_0304300	1.85286	1.79095	1.3448	4.18027	0	0	2.29222	0		0	0	2.09327	1.04288	0	0	0	0.784037
PcyM_0304400	0.689525	0.595333	0.230931	1.07995	0	0	0.648935	0		0	0.293584	0.170466	0.509564	0	0	0.146792	0.170007
PcyM_0304500	0.412484	1.07205	0.450595	1.46019	0.00325153	0	0.84883	0.00162576		0	0.224607	0.0372614	0.525565	0	0.485797	0.112303	0.262156
PcyM_0304600	0.140499	0.00475927	1.13492	0.0954206	0.00307976	0	0.3439	0.00153988		22.5887	6.28252	18.992	15.1161	91.6867	36.4903	14.4356	40.5713
PcyM_0304700	6.40578	4.94673	2.96937	3.64705	0	0	4.49223	0		0	0	0	0	0	0	0	0
PcyM_0304800	1.07339	12.9719	6.86175	3.19496	0.361862	0.642778	6.0255	0.50232		97.2986	78.2007	74.1416	64.2751	75.0471	81.9059	87.7496	73.8424
PcyM_0304900	6.29885	1.97264	0.849362	5.85838	0.190039	0.268521	3.74481	0.22928		61.686	71.6766	66.7742	61.076	88.5253	49.8968	66.6813	66.5681
PcyM_0305000	25.1293	0.167645	13.0196	34.1289	0.341693	0.692853	18.1113	0.517273		70.485	60.3603	61.672	64.5804	95.0359	79.9707	65.4227	75.3148
PcyM_0305100	12.2963	0.00182704	0.016697	0.339192	0.000341395	0.173657	3.1635	0.0869993		41.2554	47.2796	32.7732	26.484	48.1724	43.3121	44.2675	37.6854
PcyM_0305200	0.140252	0.0101042	0.0985848	0.21244	0.215489	0.17271	0.115345	0.194099		47.1636	49.0993	40.3056	47.4038	66.4282	67.8484	48.1314	55.4965
PcyM_0305300	0.0178255	0.018141	0.0371258	0.0462371	0	0.330179	0.0298324	0.165089		32.0342	33.3974	27.3791	25.9829	18.1119	18.5749	32.7158	22.5122
PcyM_0305400	0.00228906	0.00349248	0.0133506	0.769596	0.581031	0.217403	0.197182	0.399217		70.4883	56.1728	77.2198	99.1696	43.6117	65.4182	63.3306	71.3548
PcyM_0305500	0.0213521	0.114868	0.0120648	0.0512514	0.254222	0.570611	0.049884	0.412416		124.601	95.962	106.157	100.455	80.6985	115.127	110.281	100.609
PcyM_0305600	0.0607367	0.0981605	0.0118738	0.0746919	0.052655	0.118952	0.0613657	0.0858035		20.8296	28.6929	31.845	31.485	2.25109	9.53061	24.7613	18.7779
PcyM_0305700	3.63656	0.142016	11.3957	12.9855	0.245027	0.413661	7.03995	0.329344		63.2889	77.1544	77.6819	74.572	61.3198	89.69	70.2217	75.8159
PcyM_0305800	0.0903536	0.136305	0.0464386	0.134436	0.249267	0.301892	0.101883	0.275579		46.1134	45.7371	66.0431	57.385	17.6025	67.9343	45.9252	52.2412
PcyM_0305900	0.549308	11.1458	5.96698	0.10662	0.158156	0.0425657	4.44218	0.100361		15.099	23.2914	21.4972	17.6014	6.0088	29.0602	19.1952	18.5419
PcyM_0306000	0.660098	0.826842	0.36408	0.32712	0	0	0.544535	0		8.72381	6.83817	7.63556	8.52117	8.15099	5.0652	7.78099	7.34323
PcyM_0306100	1.60833	2.00174	43.4646	35.5602	0.681018	0.458219	20.6587	0.569618		153.291	132.406	108.358	110.002	189.694	158.513	142.849	141.642
PcyM_0306200	0.349935	3.16869	8.24126	0.968262	0	0	3.18204	0		13.1723	8.55337	7.4496	7.43272	11.9655	1.19161	10.8628	7.00987
PcyM_0306300	0.135913	7.44471	0.564528	0.324022	0.79193	1.14181	2.11729	0.966871		144.909	201.546	155.65	157.546	52.2804	179.336	173.228	136.203
PcyM_0306400	0.522571	0.431425	1.503	80.566	1.24959	1.08655	20.7557	1.16807		183.011	126.884	125.099	133.914	231.265	112.891	154.948	150.792
PcyM_0306500	0.723166	0.455933	0.158713	4.48298	0	0.385796	1.4552	0.192898		26.1754	22.1188	30.6103	36.1365	48.1467	74.0627	24.1471	47.2391
PcyM_0306600	1.38262	0.666455	2.21601	7.5908	0.830425	0.361036	2.96397	0.595731		72.4556	69.5901	65.2803	61.3765	57.9301	99.8332	71.0228	71.105
PcyM_0306700	8.94887	2.89497	0.379801	0.615007	0.31715	0.937922	3.20966	0.627536		145.696	197.835	72.1269	62.3624	85.6845	53.8763	171.766	68.5125
PcyM_0306800	0.929085	3.2934	0.100408	2.76523	0.193245	0.390072	1.77203	0.291658		44.5857	98.3087	74.7655	82.7837	112.926	32.8297	71.4472	75.8263
PcyM_0306900	0.0939607	0.317285	0.190373	0.127346	0	0	0.182241	0		1.95485	2.29916	4.24327	4.15986	3.14563	3.15284	2.12701	3.6754
PcyM_0307000	0.251123	0.184674	0.0777418	0.158683	0	0.170005	0.168055	0.0850027		20.9016	49.3911	92.5703	127.651	158.415	45.5738	35.1463	106.052
PcyM_0307100	0.00745149	0.179427	0.329536	0.0314242	0.396692	0.605809	0.13696	0.50125		79.4167	75.531	64.3922	62.9764	34.785	96.4398	77.4738	64.6483
PcyM_0307200	0.0705097	3.71625	0.0385149	0.128304	0.553355	0.343068	0.988394	0.448211		80.7093	77.8113	79.629	81.3349	59.7979	63.4458	79.2603	71.0519
PcyM_0307300	52.6289	0.0127919	0.0913613	0.244818	0	0	13.2445	0		6.82751	8.05091	6.01027	7.65226	9.40615	7.38338	7.43921	7.61301
PcyM_0307400	0.161493	0.0138853	0.0135528	0.0837846	0	0	0.0681789	0		15.3598	29.9452	42.3479	40.5951	18.0363	39.1228	22.6525	35.0255
PcyM_0307500	16.9739	35.5901	4.1695	5.68622	4.64002	8.17707	15.6049	6.40854		2051.58	3036.36	1824.81	1616.24	1122.45	1259.71	2543.97	1455.8
PcyM_0307600	0.756531	16.168	0.950517	0.898401	0.198827	0.389963	4.69336	0.294395		84.3423	95.8207	68.2478	56.2121	91.5629	76.9844	90.0815	73.2518
PcyM_0307700	0.0799524	1.32618	0.0609041	0.239927	0.518577	0.158843	0.426741	0.33871		66.3391	54.8293	40.615	42.187	52.7104	51.813	60.5842	46.8314
PcyM_0307800	0.0545963	0.529526	0.0801499	0.54354	0.424104	0.856067	0.301953	0.640085		125.226	108.944	96.3917	117.233	223.484	92.7282	117.085	132.459
PcyM_0307900	1.04811	0.0108019	1.42768	1.10141	0.354419	0.286162	0.897003	0.320291		126.416	101.755	90.3265	115.971	232.278	123.878	114.085	140.613
PcyM_0308000	0.0536466	0.0249033	0.0047568	0.014018	0.147425	0.292622	0.0243312	0.220023		54.8571	87.409	49.9835	38.0446	12.5111	40.1597	71.1331	35.1747
PcyM_0308100	1.57367	3.02311	3.04951	2.93104	1.67473	0.676099	2.64433	1.17541		111.01	97.7456	104.178	102.877	159.876	88.5344	104.378	113.866
PcyM_0308200	45.7475	4.49541	26.3286	6.65837	0.0821691	0.315136	20.8075	0.198653		39.5411	51.8528	54.6983	52.3036	42.2975	54.8492	45.6969	51.0371
PcyM_0308300	0.164229	0.555591	2.54367	0.913593	0.182067	0.404259	1.04427	0.293163		67.1838	58.2655	70.7821	75.056	100.093	98.0484	62.7247	85.995
PcyM_0308400	0.0969926	0.11777	0.0602908	0.134407	1.3298	1.14625	0.102365	1.23803		206.529	167.176	159.59	168.166	118.174	153.789	186.853	149.93
PcyM_0308500	0.254466	0.555307	0.107546	2.31552	0.199446	0.161035	0.808209	0.180241		36.4521	43.7797	79.4955	91.0838	91.6717	38.6944	40.1159	75.2363
PcyM_0308600	0.574331	1.3904	0.210517	1.26595	0.695051	1.23463	0.8603	0.964838		140.58	139.186	109.507	109.172	145.439	113.228	139.883	119.337
PcyM_0308700	0.179382	3.31043	0.344988	11.9382	0.37559	0.833954	3.94326	0.604772		84.4567	91.0768	68.4178	77.8668	108.884	87.4703	87.7668	85.6598
PcyM_0308800	4.40233	6.57456	2.22239	0.85271	0.0983347	0.109998	3.513	0.104166		14.6838	19.7488	17.9949	18.0327	17.6344	15.6711	17.2163	17.3333
PcyM_0308900	0.359748	1.1311	2.97171	0.222797	0.325307	0.196993	1.17134	0.26115		69.1033	72.6808	69.8635	67.7132	116.171	77.6385	70.8921	82.8466
PcyM_0309000	0.335352	1.13819	1.35227	0.599838	0.501097	0.690186	0.856412	0.595641		77.8662	74.6373	101.879	109.454	96.3348	83.5107	76.2518	97.7946
PcyM_0309100	0.265473	0.894448	8.01577	3.46888	1.32356	1.29357	3.16114	1.30856		166.303	157.887	154.562	137.972	110.207	117.253	162.095	129.999
PcyM_0309200	0.153811	0.00474213	0.0119548	0.409419	0	0.0142096	0.144982	0.00710478		4.82444	7.74998	6.41165	7.86568	2.09311	17.7763	6.28721	8.53668
PcyM_0309300	8.27703	32.4598	5.05442	4.83826	0.248939	0.427118	12.6574	0.338029		66.5449	62.6491	60.922	53.7342	38.4742	86.4353	64.597	59.8914
PcyM_0309400	46.24	23.5877	17.1843	4.81965	0.818423	0.738208	22.9579	0.778316		134.395	133.22	110.867	99.0685	159.976	154.613	133.808	131.131
PcyM_0309500	255.897	146.178	61.7651	28.701	0.52004	0.209944	123.135	0.364992		45.9834	49.7683	50.4073	40.9174	59.5956	34.0312	47.8759	46.2379
PcyM_0309600	1.07406	1.72912	1.12339	3.14959	0.331641	0.200829	1.76904	0.266235		49.5295	60.3761	55.5039	60.7478	57.7272	27.5749	54.9528	50.3884
PcyM_0309700	0.348321	0.0041853	0.232366	0.210279	0.12982	0.0943369	0.198788	0.112079		18.6262	20.9994	16.9551	16.7322	14.2499	15.9114	19.8128	15.9622
PcyM_0309800	0.0734461	9.88363	3.54632	0.017516	1.44709	0.145645	3.38023	0.796365		68.1467	69.7008	76.4198	87.4101	54.0817	64.1598	68.9238	70.5179
PcyM_0309900	0.176141	0.0329759	0.00815712	0.0435717	0	0	0.0652114	0		8.67547	9.20452	4.90641	7.10043	9.87249	3.22893	8.94	6.27707
PcyM_0310000	0.0336443	0.227024	0.101397	38.395	0	0.0258436	9.68928	0.0129218		3.57962	7.00156	7.75747	9.32748	3.33098	16.5636	5.29059	9.24489
PcyM_0310100	0.516269	0.160612	0.896876	8.81879	0.101833	0.143887	2.59814	0.12286		31.8652	45.2742	45.7632	42.8807	16.7635	33.9858	38.5697	34.8483
PcyM_0310200	0.912509	0.25122	0.0252559	0.0841185	0.125551	0.324388	0.318276	0.224969		59.2291	76.7896	85.7676	88.1934	41.4993	87.3794	68.0093	75.7099
PcyM_0310300	16.8189	5.30444	1.20512	2.51296	0.39695	0.335071	6.46036	0.36601		74.661	69.2862	85.3803	77.2774	37.0176	66.0935	71.9736	66.4422
PcyM_0310400	0.351447	1.65814	0.294054	0.500674	0.00125486	0.2381	0.701079	0.119677		24.6943	42.9758	46.0297	97.7695	105.511	29.968	33.835	69.8194
PcyM_0310500	3.52121	0.103659	2.4235	0.799663	0.459568	0.404794	1.71201	0.432181		94.5013	110.584	95.579	90.4592	127.071	100.804	102.543	103.478
PcyM_0310600	1.25792	0.892284	0.119177	2.50704	0	0.152443	1.19411	0.0762216		26.6835	40.7566	31.0024	29.2391	30.0574	70.2071	33.72	40.1265
PcyM_0310700	0.276271	0.592199	0.251166	0.51242	0.265184	0.294405	0.408014	0.279795		34.5847	39.4032	38.2793	33.7814	22.094	20.3138	36.994	28.6171
PcyM_0310800	0.336836	0.199077	0.522346	0.204385	0.356417	0.417275	0.315661	0.386846		77.2376	86.6584	86.8449	69.7729	11.1274	63.276	81.948	57.7553
PcyM_0310900	0.0613641	0.205942	0.0273762	0.120046	1.17753	0.929144	0.103682	1.05334		94.0221	102.869	92.3354	94.625	135.804	90.5728	98.4458	103.334
PcyM_0311000	2.08701	4.30107	1.36558	9.33311	0	0	4.27169	0		0	0	0	0.37996	0	0	0	0.0949901
PcyM_0311100	18.7141	0.0182073	0.0496245	0.0166897	0.530032	0.149784	4.69964	0.339908		42.879	39.3977	56.9784	63.585	39.071	61.1273	41.1384	55.1905
PcyM_0311200	3.77903	2.60894	0.534186	0.282791	0.076735	0.340763	1.80124	0.208749		33.8689	35.4481	43.2809	42.8702	58.181	66.8747	34.6585	52.8017
PcyM_0311300	0.242672	3.35811	0.658935	0.639077	0	0	1.2247	0		2.47031	2.53423	3.69969	3.68642	0.249333	8.05691	2.50227	3.92309
PcyM_0311400	1.91792	0.0710841	0.327974	0.901733	0.359188	0.57874	0.804678	0.468964		66.5889	60.9118	64.4763	59.2632	50.107	75.5462	63.7504	62.3482
PcyM_0311500	2.0474	5.40552	0.528674	3.69095	0.309094	0.145581	2.91813	0.227338		19.3917	23.5755	19.5001	20.0307	44.8355	23.1619	21.4836	26.8821
PcyM_0311600	0.0933147	0.180237	0.292923	0.0310737	0.941019	0.695831	0.149387	0.818425		90.7341	89.0767	101.965	101.532	43.6296	60.3769	89.9054	76.876
PcyM_0311700	38.8	40.5846	1.92159	2.43676	0.432675	0.40175	20.9358	0.417212		92.2822	77.3353	81.98	78.7321	74.3131	105.128	84.8087	85.0384
PcyM_0311800	15.5784	0.308591	0.0925673	0.458483	0.311858	0.251798	4.1095	0.281828		54.0561	56.6109	43.5188	38.3279	25.371	47.1382	55.3335	38.589
PcyM_0311900	4.39304	0.0709296	0.294584	0.597794	0.968786	0.676506	1.33909	0.822646		160.244	137.758	141.652	138.771	71.6568	130.1	149.001	120.545
PcyM_0312000	0.606228	0.699612	18.3363	1.64311	0.247414	0.432824	5.32131	0.340119		54.7487	57.0876	47.1365	49.6455	63.9606	26.54	55.9182	46.8206
PcyM_0312100	2.7945	0.924765	0.678646	92.1163	0.423417	0.341873	24.1285	0.382645		28.5851	23.4598	22.2899	25.9116	32.5234	7.17155	26.0224	21.9741
PcyM_0312200	0.0439499	0.000909796	0.16333	0.0282813	0.0818048	0.305858	0.0591176	0.193831		55.5412	59.3111	64.2035	56.3424	12.7829	31.3022	57.4261	41.1577
PcyM_0312300	9.10922	23.91	3.96379	4.16902	1.29136	0.417065	10.288	0.854214		67.0438	74.3365	72.1893	80.6396	75.2737	134.017	70.6902	90.5299
PcyM_0312400	4.24217	1.72389	5.22568	1.83243	0.960662	1.26646	3.25604	1.11356		202.567	164.307	179.869	200.299	198.212	173.251	183.437	187.908
PcyM_0312500	0.210579	0.0168169	4.41264	0.0743662	0	0.150082	1.1786	0.075041		25.7315	22.6485	29.7182	30.4371	26.7132	64.8742	24.19	37.9357
PcyM_0312600	0.168881	1.83933	0.745108	0.94234	0.151751	0.122526	0.923916	0.137138		22.9386	15.3234	28.1221	30.9975	44.1809	92.607	19.131	48.9769
PcyM_0312700	0.180705	0.133633	0.404985	0.0847304	0.728404	0.525746	0.201013	0.627075		66.9287	70.3603	76.6726	73.0953	9.9266	46.29	68.6445	51.4961
PcyM_0312800	0.104854	0.166977	0.0700698	0.268365	0.748219	0.819879	0.152566	0.784049		146.088	120.561	128.481	120.992	136.662	115.002	133.325	125.284
PcyM_0312900	63.1624	10.6234	22.3513	2.3312	1.00137	0.907066	24.6171	0.954218		102.486	85.507	94.1861	88.8079	129.747	65.7322	93.9963	94.6183
PcyM_0313000	2.67807	0.483599	0.139788	0.223556	1.77587	1.24885	0.881253	1.51236		175.416	162.739	146.271	167.916	216.109	206.095	169.077	184.098
PcyM_0313100	0.123531	1.3976	8.85529	0.453191	0.106455	0.107441	2.7074	0.106948		29.9641	36.2701	39.9624	23.5325	16.1561	21.2269	33.1171	25.2195
PcyM_0313200	0.0404061	0.0534358	0.601306	0.0265723	0.194172	0.324753	0.18043	0.259463		21.9991	40.7244	48.9996	31.6455	8.24776	18.6648	31.3617	26.8894
PcyM_0313300	2.07749	1.05666	5.38606	0.515909	0.621267	0.407113	2.25903	0.51419		62.4672	63.1705	46.9421	53.4645	73.5436	67.3813	62.8189	60.3329
PcyM_0313400	2.31937	0.0487251	0.0537388	0.138786	0	0.0772506	0.640154	0.0386253		8.22077	8.46789	13.0314	10.6347	1.068	35.5038	8.34433	15.0595
PcyM_0313500	1.62538	1.07009	0.890183	0.544321	0.57157	0.288433	1.03249	0.430002		28.7453	36.0895	36.5367	34.6212	26.0233	12.3211	32.4174	27.3756
PcyM_0313600	0.0436723	0.00555347	3.96223	0.00755602	0.0806273	0.211574	1.00475	0.1461		29.5252	49.8936	39.1854	44.2727	17.3807	29.2985	39.7094	32.5343
PcyM_0313700	20.1159	13.2677	5.79603	9.23461	0.27713	0.671275	12.1036	0.474202		71.169	77.93	77.8289	62.5262	12.3601	72.5885	74.5495	56.3259
PcyM_0313800	3.09049	4.58076	0.878956	3.28153	0.295762	0.274622	2.95793	0.285192		42.4612	45.2236	46.5733	36.273	13.6674	42.3067	43.8424	34.7051
PcyM_0313900	9.42279	10.7421	6.31877	12.9051	0	0	9.84719	0		0	0	0	0	0	0	0	0
PcyM_0314000	1.60223	0.887267	1.76578	2.08187	0	0	1.58428	0		0.0720587	0	0.300582	0.0619388	0.0378895	0	0.0360294	0.100103
PcyM_0314100	0.153018	0.217886	0.488745	0.223092	0	0	0.270685	0		10.8563	13.0175	10.2795	13.2552	15.2409	20.0562	11.9369	14.7079
PcyM_0314200	0.0195715	0.0514229	0.180771	0.189998	0.120657	0.0729031	0.110441	0.0967801		14.3657	21.3241	16.1681	13.9416	7.54794	12.9918	17.8449	12.6624
PcyM_0314300	0.608707	0.432037	0.136924	35.2336	0	0.107392	9.10281	0.0536958		8.34445	5.93376	6.89072	10.1883	8.2391	7.78233	7.13911	8.27511
PcyM_0314400	0.0580893	0.626693	0.0266137	1.31976	0.0530792	0.22857	0.50779	0.140824		43.2542	52.4809	33.9596	31.5545	19.8266	28.6051	47.8675	28.4865
PcyM_0314500	6.20549	0.0104837	0.0934039	0.020403	0	0.323149	1.58245	0.161575		38.1731	36.8059	37.5908	38.455	74.9713	65.6926	37.4895	54.1774
PcyM_0314600	0.914457	0.0306589	0.00832299	0.00356771	0.292713	0.320747	0.239252	0.30673		49.4393	65.3508	64.3549	53.4256	20.541	56.7567	57.3951	48.7696
PcyM_0314700	0.246056	0.167003	0.0592295	0.202569	0.149909	0.304923	0.168714	0.227416		53.1781	81.2243	71.6509	64.1548	13.1862	58.3981	67.2012	51.8475
PcyM_0314800	0.248258	0.0994507	0.0163189	0.0331279	0.16753	0.367188	0.0992888	0.267359		26.5619	39.8173	44.1058	43.0564	46.622	21.1742	33.1896	38.7396
PcyM_0314900	0.278975	1.91246	0.206509	0.35631	1.14607	1.37089	0.688563	1.25848		283.431	264.696	206.854	222.411	282.763	243.099	274.063	238.782
PcyM_0315000	0.3757	0.366298	6.1304	0.177263	0.370802	0.187119	1.76242	0.278961		32.1131	31.1504	31.8363	31.4135	30.0898	34.1139	31.6317	31.8634
PcyM_0315100	8.67454	23.1754	17.5099	13.2949	0.688801	0.926911	15.6637	0.807856		157.17	145.385	106.493	117.866	160.608	122.265	151.277	126.808
PcyM_0315200	0.0746404	0.000694322	0.00730913	0.055035	0.202348	0.429797	0.0344197	0.316072		40.1194	57.8034	43.4154	36.0539	6.14187	28.3525	48.9614	28.4909
PcyM_0315300	6.2801	5.73983	0.735634	0.822778	0.200595	0.462752	3.39459	0.331674		105.003	101.697	80.9243	71.4116	54.6205	97.9257	103.35	76.2205
PcyM_0315400	5.50886	3.74757	1.69631	6.22661	0	0.226654	4.29484	0.113327		55.7052	62.2131	48.7898	37.6298	25.7356	41.0622	58.9592	38.3044
PcyM_0315500	0.0375985	0.906539	0.0619509	0.0916211	0.0781177	0.252293	0.274427	0.165205		55.2236	59.695	62.2562	45.5776	7.79078	39.633	57.4593	38.8144
PcyM_0315600	1.54243	0.111151	0.310019	0.236303	3.78938	4.15997	0.549977	3.97467		793.947	753.525	654.668	683.409	774.716	379.87	773.736	623.166
PcyM_0315700	3.65871	1.97255	2.09012	4.19139	1.01207	1.05063	2.97819	1.03135		122.945	148.491	123.59	142.167	102.457	90.8285	135.718	114.761
PcyM_0315800	0.139575	0.191655	0.00868038	0.0456321	0.961169	0.711389	0.0963856	0.836279		95.276	105.317	103.854	115.862	75.8136	100.226	100.297	98.9389
PcyM_0315900	0.116999	22.748	7.34863	7.15855	0.997487	0.736904	9.34305	0.867196		95.6201	106.15	90.441	94.6432	163.233	74.4805	100.885	105.7
PcyM_0316000	0.00362555	0.00462093	0.00264778	0.0131915	0.302875	0.290398	0.00602144	0.296636		28.9153	27.0785	28.4401	21.9077	4.59659	19.82	27.9969	18.6911
PcyM_0316100	54.4759	60.1685	18.4856	6.49444	2.01859	2.89372	34.9061	2.45615		481.225	401.506	337.155	356.018	453.021	478.437	441.365	406.158
PcyM_0316200	0.0261696	0.348882	0.0620511	2.80215	0.332691	0.322343	0.809814	0.327517		96.9188	87.4969	79.5627	92.435	90.2653	127.861	92.2078	97.5309
PcyM_0316300	22.5522	0.110643	6.8525	0.407742	1.05955	1.28065	7.48077	1.1701		192.995	188.038	166.475	182.564	302.854	178.209	190.516	207.526
PcyM_0316400	2.1118	14.0452	6.72559	2.7469	0.647562	0.240511	6.40738	0.444036		53.5823	62.4568	68.6748	71.6943	46.0178	60.8223	58.0195	61.8023
PcyM_0316500	0.425854	0.234536	4.17701	0.132815	1.53114	1.10515	1.24255	1.31814		143.066	177.133	190.53	174.929	61.9089	184.606	160.099	152.993
PcyM_0316600	0.188914	0.0758549	10.5794	0.0766696	1.9758	0.98468	2.7302	1.48024		106.8	95.8183	95.403	107.584	172.026	88.3463	101.309	115.84
PcyM_0316700	60.8604	16.0388	31.2344	43.3205	0.387192	0.60487	37.8635	0.496031		103.471	104.506	81.2229	76.1569	23.8615	62.6239	103.989	60.9663
PcyM_0316800	276.959	7.8219	1.41508	2.30181	0.353647	0.339078	72.1245	0.346363		67.7134	73.7642	66.4904	74.5323	66.4319	110.676	70.7388	79.5326
PcyM_0316900	0.115761	0.0694049	0.0546279	0.0845051	0.681526	0.609231	0.0810747	0.645378		119.825	102.726	113.093	119.254	64.572	80.1658	111.276	94.2712
PcyM_0317000	0.00773634	0.00293823	0.0300002	0.00388846	0.817413	0.673934	0.0111408	0.745674		107.616	98.712	104.474	104.687	65.7679	54.3785	103.164	82.327
PcyM_0317100	0.111206	0.0915717	3.02363	0.178472	0	0	0.85122	0		1.35576	2.12351	1.81704	1.26737	1.84733	1.57846	1.73964	1.62755
PcyM_0317200	3.87487	1.34081	6.29062	9.54274	0.533779	0.831176	5.26226	0.682477		175.862	158.133	133.51	120.352	253.432	163.556	166.997	167.713
PcyM_0317300	0.139539	0.0928769	0.0342853	0.0967788	0.180764	0.0729757	0.0908701	0.12687		16.5178	22.8709	15.7851	13.5956	15.3405	16.2825	19.6944	15.2509
PcyM_0317400	0.201426	0.32935	0.0368624	0.0606685	0	0.0353071	0.157077	0.0176536		3.16372	3.08359	2.41162	1.31071	1.95031	0.942641	3.12366	1.65382
PcyM_0317500	0.39091	1.58495	0.233115	0.528576	0	0.00535852	0.684387	0.00267926		15.9304	15.3387	12.2003	6.80767	11.5768	18.4347	15.6346	12.2549
PcyM_0317600	0.0575714	0.07369	0.0557751	0.112519	0	0.0886607	0.0748889	0.0443303		22.614	25.7592	17.8006	13.3483	11.8356	30.7722	24.1866	18.4392
PcyM_0317700	0.316646	103.851	0.0201813	0.164008	0	0.400479	26.0879	0.200239		14.6118	19.9864	15.7495	11.7285	8.35715	28.1049	17.2991	15.985
PcyM_0317800	4.58259	0.00560805	0.0947957	0.0669711	0.187935	0.120191	1.18749	0.154063		26.0376	36.6593	30.7858	34.9773	39.5585	32.089	31.3485	34.3527
PcyM_0318000	0.0713671	0.035235	1.78671	0.0312915	0.0604669	0.146465	0.48115	0.103466		13.7308	12.4872	11.2926	11.3276	2.77175	31.8416	13.109	14.3084
PcyM_0318100	1.30447	2.04178	0.92496	1.42659	1.28526	0.778304	1.42445	1.03178		133.056	152.306	121.828	130.889	138.133	109.092	142.681	124.985
PcyM_0318200	0.0814966	0.0776191	2.14737	3.43295	1.51307	1.68878	1.43486	1.60092		231.941	215.569	195.821	220.655	375.789	235.442	223.755	256.927
PcyM_0318300	0.0595065	0.193902	0.51569	0.121052	0.0675993	0.0272903	0.222538	0.0474448		5.80829	11.0416	15.929	19.0251	1.59122	18.2151	8.42494	13.6901
PcyM_0318400	0.0246952	0.132783	0.294427	0.766136	0.195735	0.375342	0.30451	0.285539		75.2138	67.2521	61.63	60.3396	54.5615	59.1497	71.233	58.9202
PcyM_0318500	0.0173382	0.0318951	0.0151321	0.0248735	0.587826	0.692152	0.0223097	0.639989		84.925	65.5256	60.9922	55.3868	63.6617	50.7614	75.2253	57.7006
PcyM_0318600	0.00422412	0.125067	0.0365821	0.0923553	0.467472	0.868528	0.0645572	0.668		100.647	76.5414	85.8191	86.757	106.525	66.6167	88.5941	86.4294
PcyM_0318700	0.0107267	0.00485572	0.0353657	2.28735	0.611997	0.680839	0.584574	0.646418		135.06	131.559	114.966	106.369	186.897	66.3162	133.31	118.637
PcyM_0318800	0.0124892	0.25679	0.746996	0.121671	0.230832	0.279565	0.284486	0.255198		34.2496	33.4684	29.704	34.0179	62.057	29.8557	33.859	38.9087
PcyM_0318900	0.00519065	0.0670002	0.0197377	0.0476797	0	0.17571	0.0349021	0.087855		36.9889	48.6675	34.414	34.5171	9.77336	23.0369	42.8282	25.4354
PcyM_0319000	3.39729	5.9791	0.307358	0.980366	0	0	2.66603	0		0.092001	0.551812	1.06801	0.00236484	0.475043	0	0.321906	0.386354
PcyM_0319100	0.389202	0.0887626	0.0573626	0.0413604	0.0810629	0.0960426	0.144172	0.0885528		50.2916	34.9215	27.3669	27.9291	23.5819	21.2479	42.6065	25.0314
PcyM_0319200	0.177818	0.100106	0.0167666	0.0150358	0.579947	0.561908	0.0774315	0.570928		56.3558	46.4468	41.2882	32.0141	32.2604	23.7532	51.4013	32.329
PcyM_0319300	0.165596	1.39991	0.202003	0.522841	0.955449	0	0.572588	0.477724		2.17181	2.29166	6.65311	6.09892	0.394568	19.6154	2.23174	8.19051
PcyM_0319400	0.106302	0.39834	0.0577548	0.593068	0	0.0058906	0.288866	0.0029453		11.9147	9.5543	15.8502	19.8997	15.9802	38.5534	10.7345	22.5709
PcyM_0319500	2.81234	0.0766294	0.017522	0.0285547	4.61982	2.65943	0.733762	3.63962		327.346	288.006	237.636	258.735	489.04	224.862	307.676	302.568
PcyM_0319600	40.3264	15.2143	18.3934	8.87208	2.89202	1.83469	20.7015	2.36336		257.046	228.907	199.08	207.425	469.363	311.074	242.976	296.735
PcyM_0319700	0.175408	0.231843	0.0363518	0.289667	0.351189	0.212666	0.183317	0.281928		28.1394	26.0281	33.1624	24.4179	16.3251	20.8187	27.0837	23.681
PcyM_0319800	0.0131737	0.0307633	1.21527	7.39304	0.572245	0.6023	2.16306	0.587272		101.862	99.3743	104.858	83.6999	8.96319	81.7393	100.618	69.8151
PcyM_0319900	1.97228	0.165517	0.0834583	0.485657	0.139423	0.381428	0.676729	0.260425		43.0254	59.2095	63.8447	37.0616	7.60845	42.5881	51.1175	37.7757
PcyM_0320000	0.616617	2.39891	0.782099	8.98385	0.243009	0.883882	3.19537	0.563446		123.208	150.99	135.795	148.131	261.135	136.418	137.099	170.37
PcyM_0320100	35.9182	10.0086	15.8127	12.0273	6.16516	6.87214	18.4417	6.51865		1153.36	954.096	735.265	839.38	2016.94	1006.6	1053.73	1149.55
PcyM_0320200	0.739268	0.00677163	0.921474	5.5695	0.708443	0.357504	1.80925	0.532974		94.6844	86.9275	102.279	109.344	130.074	112.574	90.8059	113.567
PcyM_0320300	0.0697905	0.0167661	0.0436521	0.023608	0.229917	0.330533	0.0384542	0.280225		61.6164	98.016	62.8045	56.4441	30.268	62.6804	79.8162	53.0492
PcyM_0320400	17.9507	17.7449	35.4722	56.8001	0.837314	0.24145	31.992	0.539382		61.9123	63.1328	51.583	44.5514	62.247	57.5562	62.5225	53.9844
PcyM_0320500	0.966163	0.117317	0.0697429	0.064675	0.359459	0.00558138	0.304474	0.18252		39.71	44.2293	30.6602	36.2138	32.9547	21.0322	41.9696	30.2152
PcyM_0320600	3.13398	1.98373	7.06865	3.58892	0	0	3.94382	0		21.3558	13.9838	22.0129	16.9152	11.7849	22.6089	17.6698	18.3305
PcyM_0320700	0.164122	8.11513	1.76154	2.41721	0.798049	0.789336	3.1145	0.793693		108.611	117.552	107.489	97.36	64.6117	98.1197	113.082	91.8952
PcyM_0320800	0.0549196	0.0447499	0.0398343	0.114946	6.09162	0.614807	0.0636125	3.35321		181.565	202.726	171.793	210.696	330.806	272.79	192.146	246.521
PcyM_0320900	0.00736133	0.00983701	0.013328	0.0154051	0.10772	0.231932	0.0114828	0.169826		21.6947	31.6501	25.6231	20.9013	4.46246	15.1488	26.6724	16.5339
PcyM_0321000	4.42986	6.87724	9.6778	19.2934	0	0.00915316	10.0696	0.00457658		0.340145	0	0	1.24591	1.85389	2.3361	0.170072	1.35898
PcyM_0321100	0.826199	1.51731	0.572544	0.95991	0.266684	0.96896	0.96899	0.617822		97.388	92.1092	91.82	80.6109	50.2371	84.5895	94.7486	76.8144
PcyM_0321200	0.0491503	1.28672	0.0108441	0.175173	0.493779	0.199342	0.380471	0.34656		84.1799	81.897	94.1076	80.7172	51.9981	78.6909	83.0384	76.3784
PcyM_0321300	0.0179986	9.35445	1.22632	0.0117041	1.32623	0.702722	2.65262	1.01448		135.262	125.828	145.486	151.66	159.071	139.754	130.545	148.993
PcyM_0321400	0.993768	0.0718854	0.0188219	0.0887471	0.179527	0.217429	0.293306	0.198478		24.6807	35.2403	23.4776	21.4946	15.7026	32.6738	29.9605	23.3371
PcyM_0321500	24.3912	147.407	61.4762	44.5129	5.37548	4.22114	69.4468	4.79831		615.886	606.742	487.073	523.988	840.215	304.009	611.314	538.821
PcyM_0321600	0.0470378	3.05203	0.124402	0.997588	0.613231	0.708549	1.05526	0.66089		75.0555	85.7258	85.488	70.4473	34.738	28.2616	80.3906	54.7337
PcyM_0321700	0.303865	0.885217	0.507715	1.05427	0.12682	0.179193	0.687765	0.153006		57.7418	48.5471	48.2884	50.9218	19.543	25.4341	53.1445	36.0468
PcyM_0321800	33.2561	0.237027	21.7918	5.27871	2.35958	0.952577	15.1409	1.65608		137.239	139.506	134.73	139.077	257.614	194.677	138.372	181.525
PcyM_0321900	29.0904	10.4342	32.4728	9.14085	4.57154	3.40474	20.2846	3.98814		651.272	429.759	371.943	364.321	892.078	175.855	540.516	451.049
PcyM_0322000	0.320916	0.349637	0.108396	1.86603	0.439157	0.236387	0.661245	0.337772		36.9847	38.0777	45.3446	37.6613	28.3823	73.8178	37.5312	46.3015
PcyM_0322100	2.02417	5.50161	1.82707	0.957209	5.07598	3.3015	2.57751	4.18874		421.477	387.058	383.55	411.711	714.283	539.722	404.268	512.316
PcyM_0322200	7.05643	11.1277	0.484224	0.655875	1.88189	0.751383	4.83105	1.31664		128.824	149.391	155.523	160.389	238.655	256.49	139.108	202.764
PcyM_0322300	0.0114138	0.0608884	0.0223711	0.0615163	1.39768	0.931014	0.0390474	1.16435		117.725	125.211	123.623	116.488	24.3287	101.363	121.468	91.4506
PcyM_0322400	5.80463	0.278493	0.117752	1.35468	0.385848	0.389423	1.88889	0.387636		46.8352	65.3146	68.5669	73.2738	97.5182	94.2657	56.0749	83.4061
PcyM_0322500	4.42865	9.4038	0.370666	0.495242	0.120858	0.121978	3.67459	0.121418		23.2412	36.503	51.8947	44.9047	36.3096	23.2614	29.8721	39.0926
PcyM_0322600	0.0334933	0.0891282	0.0109719	0.0559158	0.196091	0.334245	0.0473773	0.265168		59.2629	67.453	68.4819	56.2998	3.53609	33.0784	63.3579	40.349
PcyM_0322700	0.134741	0.0604704	1.64455	0.163213	0.501053	0.252848	0.500743	0.376951		70.4715	52.4579	58.9554	52.6689	35.5382	26.6167	61.4647	43.4448
PcyM_0322800	13.6009	12.7402	3.42076	0.838345	0.0784718	0.570232	7.65004	0.324352		122.034	126.368	131.995	132.24	97.3644	107.536	124.201	117.284
PcyM_0322900	0.313816	7.1456	3.1908	8.44489	0.997364	0.89088	4.77378	0.944122		83.8925	93.4046	104.672	67.0093	44.226	91.7421	88.6485	76.9125
PcyM_0323000	344.709	203.306	11.5585	16.7969	3.69813	1.78744	144.093	2.74278		278.052	335.019	281.429	296.143	602.775	299.207	306.536	369.888
PcyM_0323100	0.414259	4.67709	0.201742	0.410519	0.132813	0.268088	1.4259	0.20045		25.5403	32.6837	36.7247	34.1695	3.86674	58.3846	29.112	33.2864
PcyM_0323200	1.75585	16.2011	0.105807	12.2818	0	0	7.58615	0		28.1993	29.7735	40.8368	48.2025	84.7651	65.9882	28.9864	59.9482
PcyM_0323300	7.88504	1.83324	12.4447	33.4308	0.574303	0.358313	13.8984	0.466308		43.9279	54.3774	63.2942	67.6172	46.2477	62.6235	49.1526	59.9456
PcyM_0323400	0.158419	0.0289089	9.65411	0.111016	0.171389	0	2.48811	0.0856944		14.9076	16.772	48.1048	37.6726	18.2645	63.5991	15.8398	41.9103
PcyM_0323500	0.244114	0.179737	0.122599	0.865401	0.300075	0.163076	0.352963	0.231576		19.5761	23.2475	45.4295	48.8862	17.4729	101.033	21.4118	53.2055
PcyM_0323600	0.147688	0.0295416	0.0295263	0.0972102	0	0	0.0759915	0		8.15608	12.6262	16.4377	19.9166	5.65413	14.7813	10.3911	14.1974
PcyM_0323700	0.0927103	0.0487209	0.522365	0.0318638	0.293738	0.361951	0.173915	0.327844		64.649	54.5945	61.8405	57.9728	6.55041	34.8938	59.6218	40.3144
PcyM_0323800	0.391803	0.110772	0.0682447	0.127294	0	0.216797	0.174529	0.108399		24.9019	30.4623	42.106	49.4817	18.6287	78.8287	27.6821	47.2613
PcyM_0323900	0.641778	0.458263	0.969932	0.0465237	3.97957	1.42807	0.529124	2.70382		183.933	171.175	145.583	141.372	261.579	222.635	177.554	192.792
PcyM_0324000	3.78717	1.61116	5.14898	2.17805	4.31652	1.22847	3.18134	2.7725		177.342	178.634	140.909	143.043	263.896	233.882	177.988	195.432
PcyM_0324100	0.022243	0.0306991	0.0621189	0.0285306	0.507687	0.385801	0.0358979	0.446744		65.2359	74.9615	67.5264	63.1733	20.0161	68.6068	70.0987	54.8307
PcyM_0324200	0.0242704	0.044106	0.0087115	0.0403375	0.197867	0.183851	0.0293564	0.190859		26.8614	52.1774	38.0512	36.6557	10.1907	22.9805	39.5194	26.9695
PcyM_0324300	0.131689	0.601187	0.285667	0.427657	0	0.180494	0.36155	0.0902469		4.57323	8.04268	2.98872	7.07276	9.97022	2.06523	6.30796	5.52423
PcyM_0324400	0.0313336	0.0197626	0.0142967	0.0113144	0.199542	0.241669	0.0191768	0.220606		27.4326	31.9038	31.48	27.3466	8.30633	13.4574	29.6682	20.1476
PcyM_0324500	0.243241	14.0616	16.5688	4.70795	0.101755	0.0410791	8.8954	0.071417		30.5774	35.5719	31.0063	25.5859	17.1867	28.1497	33.0747	25.4822
PcyM_0324600	2.39886	3.70232	2.77472	0.16691	0	0.193241	2.2607	0.0966206		30.1804	27.5287	20.7987	23.8007	41.1161	28.3893	28.8545	28.5262
PcyM_0324700	0.0792861	0.052905	0.0818693	0.106412	0.110088	0.311102	0.0801181	0.210595		48.5044	74.9156	52.0318	50.6236	10.7211	39.6649	61.71	38.2604
PcyM_0324800	9.51636	0.144808	0.104678	0.178406	0.167038	0.304752	2.48606	0.235895		43.8543	40.3849	47.5958	34.4447	21.2117	28.0346	42.1196	32.8217
PcyM_0324900	20.0779	9.11115	0.066047	16.0399	0.0847285	0.273644	11.3237	0.179186		30.9692	39.0188	36.8183	38.5883	38.9439	39.3993	34.994	38.4374
PcyM_0325000	0.0758544	0.0986169	0.183792	0.342389	0	0	0.175163	0		6.41053	8.45537	8.34614	6.35947	0.727904	4.52335	7.43295	4.98921
PcyM_0325100	0.0184734	0.0872039	0.0388544	1.74313	0	0.59909	0.471916	0.299545		89.8307	91.5845	77.4052	71.0925	48.9322	67.6699	90.7076	66.275
PcyM_0325200	7.8992	13.3546	1.26815	1.20719	0.0757651	0.229402	5.93229	0.152583		41.688	51.0877	55.9137	54.6388	27.0426	31.2668	46.3879	42.2155
PcyM_0325300	0.0171244	0.000348258	0.0922526	0.235223	0.15143	0.191042	0.0862371	0.171236		30.9021	48.6699	32.314	25.1218	31.8697	49.5283	39.786	34.7084
PcyM_0325400	0.218364	3.05211	9.62412	0.257979	0.492835	0.636674	3.28815	0.564755		90.6565	94.0458	89.4046	86.458	76.291	89.3161	92.3511	85.3674
PcyM_0325500	0.0347303	0.053346	0.0148574	0.0370888	0.000942842	0.171284	0.0350056	0.0861135		3.26938	6.50272	4.46977	4.52169	0.588715	16.6597	4.88605	6.55996
PcyM_0325600	0.105065	0.0188843	0.107677	0.0260023	0.40382	0.326049	0.0644074	0.364934		82.645	79.8861	78.8278	79.8421	53.0071	68.4036	81.2656	70.0201
PcyM_0325700	15.475	0.0155511	7.43471	0.0612415	0	0.141743	5.74663	0.0708713		39.2042	39.592	39.9843	33.4718	16.9642	23.8642	39.3981	28.5711
PcyM_0325800	15.9645	14.6144	5.21338	9.71845	4.07033	2.3005	11.3777	3.18542		272.331	226.022	182.643	184.167	471.71	252.304	249.176	272.706
PcyM_0325900	0.0469783	0.0243127	0.0165993	0.0503973	0.346462	0.472058	0.0345719	0.40926		66.0218	64.3814	63.9985	59.9469	36.9676	35.6756	65.2016	49.1471
PcyM_0326000	0.243128	0.0738816	0.130683	0.188074	0.542641	0.0730226	0.158942	0.307832		31.9468	47.506	173.211	230.421	302.749	41.7767	39.7264	187.039
PcyM_0326100	499.204	102.21	364.916	319.349	31.8154	11.787	321.42	21.8012		1545.25	1765.28	1575.61	1293.84	1585.9	137.871	1655.27	1148.3
PcyM_0326200	209.305	176.379	244.824	209.1	2.23622	1.42161	209.902	1.82892		199.703	280.369	227.154	169.218	421.796	26.873	240.036	211.26
PcyM_0326300	0.108485	0.190145	0.0677267	0.267504	0	0	0.158465	0		23.4308	27.2152	16.7693	13.5611	6.58894	13.4351	25.323	12.5886
PcyM_0326400	0.933662	0.52839	0.078123	0.168874	0	0.0473513	0.427262	0.0236757		39.352	9.45253	45.574	61.6218	187.017	50.0262	24.4023	86.0597
PcyM_0326500	0.236807	0.873541	0.0341917	0.0474299	0	0.232694	0.297992	0.116347		31.6411	30.5876	28.7777	45.2714	77.6577	34.169	31.1143	46.4689
PcyM_0326600	0.563358	15.4811	0.46206	3.91833	5.8641	6.67276	5.10622	6.26843		1037.6	926.228	745.721	767.516	1372.29	462.226	981.914	836.939
PcyM_0326700	0.252197	0.122019	0.91747	0.65676	0	0.341341	0.487111	0.170671		2.6907	0.405598	16.4854	14.5542	26.1878	39.0567	1.54815	24.071
PcyM_0326800	0.0929139	0.350685	0.191912	0.753787	0	0	0.347324	0		3.28356	1.73238	7.24237	4.00912	7.15858	71.1759	2.50797	22.3965
PcyM_0326900	0.0401031	0.108041	0.0114109	0.00940137	0.144704	0	0.0422392	0.0723518		0.394707	0.639608	1.42218	0.481924	0.179273	35.0922	0.517157	9.29391
PcyM_0327000	0.279654	0.0769567	0.0778088	0.305255	0	0	0.184919	0		8.70282	0.258678	13.073	14.8911	25.164	47.881	4.48075	25.2523
PcyM_0327100	0.255233	0.169026	0.102282	0.245004	0	0.0079784	0.192886	0.0039892		5.60634	3.32759	4.2936	5.9895	11.4586	33.2295	4.46696	13.7428
PcyM_0327200	0.104496	0.0653486	0.0452934	0.183106	0	0	0.0995611	0		0.371649	0.294119	0.796956	0.907542	0.675201	15.5246	0.332884	4.47608
PcyM_0327300	0.717317	1.38753	0.312269	1.18584	0	0.001474	0.900739	0.000736998		1.2947	1.43446	1.58647	1.8179	1.05848	4.96975	1.36458	2.35815
PcyM_0327400	0.345416	3.01857	0.383623	0.563947	0	0	1.07789	0		0.00811139	0.359478	0	0	0	0	0.183795	0
PcyM_0327500	1.75744	0.292643	0.306192	1.19289	0	0	0.887293	0		0	0	0	0	0	0	0	0
PcyM_0327600	0.274582	1.16732	0.643115	1.34574	0.0067255	0	0.85769	0.00336275		0.810275	0.00483937	1.28694	3.24502	0.01285	0	0.407557	1.1362
PcyM_0327700	2.26981	2.7598	0.349788	1.11979	0.0468533	0.150138	1.6248	0.0984956		22.7712	26.1197	22.4488	18.0462	10.8873	33.2646	24.4455	21.1617
PcyM_0327800	0.0981715	0.805662	6.53536	6.91434	0.344922	0	3.58838	0.172461		23.9326	17.8904	21.4481	19.3945	23.0398	29.9183	20.9115	23.4502
PcyM_0327900	0.199393	2.89661	0.4824	2.6441	0	0.127236	1.55563	0.0636181		5.91035	3.40173	1.84349	2.0993	3.51417	7.76455	4.65604	3.80538
PcyM_0328000	0.0110127	0.0228789	0.0108495	0.029617	0	0	0.0185895	0		0.265608	0	0.929901	0.555941	0.275743	14.3803	0.132804	4.03548
PcyM_0328100	1.61511	3.36662	2.01583	7.5835	0.0367324	0	3.64526	0.0183662		1.12719	0.0258564	0	0	0	0	0.576524	0
PcyM_0328200	0.0257125	0.0221324	0.0464938	0.101024	0	0	0.0488406	0		0	0.130484	0	0.150984	0	0	0.0652419	0.037746
PcyM_0328300	7.22405	22.5984	3.1853	7.96146	0	0	10.2423	0		0	0.148981	0.173008	0	0	0	0.0744906	0.043252
PcyM_0328400	0.175272	1.14434	0.612957	2.05782	0	0	0.997597	0		0	0	0.0054826	0	0	0	0	0.00137065
PcyM_0328500	0.607676	1.0406	0.35032	0.0648184	0	0	0.515853	0		0.288576	1.1165	0.353609	0.254469	1.57283	0	0.70254	0.545227
PcyM_0328600	2.45726	5.22979	1.9729	2.98294	0	0.0393316	3.16072	0.0196658		0.0181828	0	0	0.0251078	0	0.0458862	0.00909141	0.0177485
PcyM_0328700	0.238016	0.881306	0.429972	0.628539	0	0	0.544458	0		0	0	0	3.42287	0	0	0	0.855718
PcyM_0328800	0.305558	1.29948	0.467001	0.402175	0	0	0.618554	0		0	0	0	0	0	0	0	0
PcyM_0328900	0.86467	0.612715	0.469768	0.755801	0	0.00104318	0.675739	0.000521588		0.0387659	0.245431	0.0475021	0.0946636	0	0.787786	0.142098	0.232488
PcyM_0329000	0.100382	0.149079	0.109341	0.130594	0	0	0.122349	0		0	0.00517778	0.04579	0	0	0	0.00258889	0.0114475
PcyM_0329100	0.0691197	0.367705	0.097249	0.439109	0	0	0.243296	0		0	0.682663	0.396379	1.18487	0	15.3385	0.341331	4.22994
PcyM_0329200	0.099843	0.197036	0.166374	0.643295	0	0	0.276637	0		0.0967271	0	1.06673	0	0	4.14971	0.0483635	1.30411
PcyM_0329300	0.00283911	0.0244792	0.0249906	0.0389347	0	0	0.0228109	0		0.705139	0	0	0	0.327415	0	0.352569	0.0818536
PcyM_0329400	0.509208	0.853279	0.317276	1.8364	0	0	0.87904	0		0.0248583	0	0.0220574	0	0.0243179	0	0.0124291	0.0115938
PcyM_0329500	0.0167177	0.0191953	0.0334283	0.0236597	0	0	0.0232502	0		0.159542	0	0.173775	0.10822	0.273749	0.840559	0.0797711	0.349076
PcyM_0329600	2.8036	0.361979	0.447609	0.379137	0	0	0.998082	0		2.09008	2.76661	1.32739	0.956966	0.949296	0	2.42835	0.808414
PcyM_0329700	0.159877	0.165444	0.493664	0.867349	0	0	0.421583	0		0	0.0860305	0.0756856	0.0248639	0.110991	0	0.0430153	0.052885
PcyM_0329800	0.300694	0.294726	0.496121	0.936699	0	0	0.50706	0		0	0	0.287902	0	0.0118571	0	0	0.0749398
PcyM_0329900	0.256522	0.541425	0.60508	1.48007	0.00847795	0	0.720774	0.00423897		0	0	0	0	0	0	0	0
PcyM_0330000	0.278375	1.61242	0.266121	0.399807	0	0.00593217	0.639181	0.00296609		0.037298	0.0759361	0.883546	0	0.142158	0.0659093	0.0566171	0.272903
PcyM_0330100	0.129525	0.359701	0.493583	0.676256	0	0.370263	0.414766	0.185131		0.0347462	0	0	0	2.27253	0	0.0173731	0.568133
PcyM_0330200	4.35667	4.24985	6.8497	0.76055	0	0.00190252	4.05419	0.000951259		3.93774	0	4.81995	3.21268	10.5006	28.8655	1.96887	11.8497
PcyM_0330300	1.26002	1.81112	4.14782	1.87766	0	0	2.27415	0		0.385012	0.00446438	0.539174	1.00733	2.71797	0.620957	0.194738	1.22136
PcyM_0330400	0.264808	0.182499	0.0322982	0.0945029	0	0	0.143527	0		0	0	0.220083	0.112227	0.00767776	1.21664	0	0.389156
PcyM_0330500	0.94219	0.551769	0.607404	1.55897	0	0	0.915084	0		0.0272093	0.0215332	0	0.314578	0.0123583	0.0552207	0.0243713	0.0955391
PcyM_0330600	0.0370842	0.0261261	0.111291	0.126698	0.283803	0	0.0753	0.141902		0	0.410597	0.018242	1.41778	0	0	0.205298	0.359005
PcyM_0330700	0.92821	6.22491	2.12037	2.08003	0	0.00634723	2.83838	0.00317362		0	0	0	0	0	0	0	0
PcyM_0330800	0	0.0224765	0.076809	0.150928	0.151317	0	0.0625533	0.0756586		0.0341427	0.0360268	0.0434461	0	0	0	0.0350847	0.0108615
PcyM_0330900	1.48722	5.01345	1.2695	1.7872	0	0	2.38934	0		0	0	0.0139273	0.00748935	0	0	0	0.00535415
PcyM_0331000	7.15966	26.33	6.75267	8.62218	0.339434	0	12.2161	0.169717		0	0	0	0	0	0	0	0
PcyM_0331100	0.0882483	2.40793	0.333573	0.0947956	0	0	0.731136	0		0.409364	0	0	0	0	0	0.204682	0
PcyM_0331200	0	0.0659911	0.148646	0.181167	0	0	0.098951	0		0	0.00500137	0	0	0	0	0.00250068	0
PcyM_0331300	0.559776	4.77443	1.58417	6.47938	0	0	3.34944	0		0	0	0	0	0	0.0478113	0	0.0119528
PcyM_0331400	0.698244	0.439925	0.160249	0.86984	0	0	0.542065	0		0	0	0	0	0	0	0	0
PcyM_0331500	0.00632167	0.0520905	0.0354152	0.0350061	0	0	0.0322084	0		0	0	0	0	0.0307385	0.0382031	0	0.0172354
PcyM_0331600	0.112145	0.172607	0.0348851	0.120843	0	0	0.11012	0		0	0	0	0.00759524	0.0226031	0	0	0.00754959
PcyM_0331700	0.549631	0.453483	0.217555	0.794464	0.0015774	0.00130256	0.503783	0.00143998		0.0943896	0.012769	0.0889701	0.593118	0	0.0273241	0.0535793	0.177353
PcyM_0331800	0.0798102	0.275793	0.159344	0.279718	0	0	0.198667	0		0.110437	0	0.00433735	0	0.0057655	0	0.0552187	0.00252571
PcyM_0331900	0.199796	0.360202	0.134528	0.34087	0	0	0.258849	0		0	0	0	0.882793	0	0	0	0.220698
PcyM_0332000	0.336397	0.316867	0.10783	0.330944	0	0	0.273009	0		0	0.0883128	0.205111	0.204375	0.00760265	0.944889	0.0441564	0.340494
PcyM_0332100	0.402079	0.0168659	0.238196	0.177829	0	0	0.208742	0		10.2394	11.8657	14.7315	13.7299	9.13525	33.4417	11.0525	17.7596
PcyM_0332200	0.0429357	0.184918	0.193717	0.432108	0	0	0.21342	0		18.6129	16.003	26.0174	19.0223	25.5494	61.9512	17.308	33.1351
PcyM_0332300	0.250963	0.338283	0.275988	0.269072	0	0	0.283577	0		0.00656969	0.131712	0.313959	0	0.00412321	0	0.0691411	0.0795204
PcyM_0332400	0.136667	0.0471971	0.136033	0.147868	0	0	0.116941	0		0.0412723	0.0435499	0.15172	0.151176	0	0	0.0424111	0.075724
PcyM_0332500	1.11428	1.57396	0.126107	0.633978	0	0	0.862081	0		0.000502598	0.268879	0.144112	0	0.534166	0.132777	0.134691	0.202764
PcyM_0332600	0.672856	1.29012	1.35432	4.00393	0.00933982	0	1.83031	0.00466991		0.013648	0	0	0	0	0.0190337	0.00682398	0.00475843
PcyM_0332700	0.143036	0.323682	0.0938671	0.0713898	0	0	0.157994	0		0	0	0	0.232325	0	0.0173994	0	0.0624312
PcyM_0332800	0.553759	2.55029	0.400732	2.35493	0.0187815	0	1.46493	0.00939077		0	0	0	0	0	0	0	0
PcyM_0332900	3.29499	3.86974	1.61265	2.41987	0	0.00955284	2.79931	0.00477642		4.72792	0	0	0.0597211	0	0.036435	2.36396	0.024039
PcyM_0333000	0.23615	0.9188	0.262602	0.669213	0	0	0.521692	0		0.621073	0	0.0585413	0	0	0	0.310536	0.0146353
PcyM_0333100	0.943805	0.52431	0.385235	1.81001	0.0185349	0	0.915841	0.00926744		0	0	0	0.00817001	0.0243136	0	0	0.0081209
PcyM_0333200	0.815202	1.28561	0.403082	1.29383	0	0	0.949433	0		0.154091	0	0	0	0.00848326	0.00527168	0.0770454	0.00343873
PcyM_0333300	1.73854	0.307267	0.310209	0.671212	0.00443711	0	0.756808	0.00221855		0	0	0.00641708	0.332492	0	0	0	0.0847273
PcyM_0333400	0.184327	0.166062	0.103679	0.543625	0.00311111	0	0.249423	0.00155555		0.00969847	0	0	0	0	0.00494487	0.00484923	0.00123622
PcyM_0333500	0.154956	0.637619	0.572425	0.315038	0	0	0.420009	0		0	0	0	0	0	0	0	0
PcyM_0400100	0.163133	0.185967	0.0957	0.330516	0	0	0.193829	0		0.117762	0	0.0967092	0.0884591	0.0198098	0.191102	0.0588809	0.09902
PcyM_0400200	0.0118151	0.00641763	0.018885	0.0314866	0	0	0.0171511	0		0.602737	0.411529	1.36852	1.21211	1.51372	4.20295	0.507133	2.07433
PcyM_0400300	0	0.0754737	0.0989121	0.0663205	0	0	0.0601766	0		0	0.226985	0	0	0.00542796	0	0.113493	0.00135699
PcyM_0400400	0.286921	0.610503	0.131162	0.505052	0	0	0.38341	0		19.1348	0.259688	12.5151	10.6673	29.0627	199.138	9.69723	62.8459
PcyM_0400500	0.717995	1.49541	0.389923	0.405756	0	0	0.752272	0		0	0	0	0	0	0	0	0
PcyM_0400600	0.259491	0.517708	0.584368	2.23013	0	0	0.897924	0		0	0	0	0	0	0	0	0
PcyM_0400700	0.130867	0.0809192	0.257909	0.934734	0	0	0.351107	0		0.00381994	0	0.0285528	0.00466401	0	0.00626358	0.00190997	0.0098701
PcyM_0400800	0.00464056	0.00488644	0.00712088	0.0102404	0.00144603	0	0.00672208	0.000723016		0.621232	0.280935	0.924353	0.650146	0.241851	0.400776	0.451084	0.554281
PcyM_0400900	1.30144	0.783674	0.76531	0.950117	0	0	0.950136	0		0.227849	0	0	0	0	0	0.113925	0
PcyM_0401000	0.552904	1.44382	0.338507	1.11554	0	0	0.862694	0		0.13801	0.00260047	0	0.168506	0	0	0.0703053	0.0421264
PcyM_0401100	0.220421	0.176886	0.144987	0.108584	0	0.00123519	0.16272	0.000617594		0.574811	0.82999	0.852633	0.960391	0.549631	0.956346	0.702401	0.82975
PcyM_0401200	0.476875	0.419087	0.507971	2.01635	0.00988421	0	0.855071	0.00494211		0	0	0	0.370334	0	2.0546	0	0.606234
PcyM_0401300	1.38049	0.824475	0.980941	4.60559	0	0	1.94787	0		0.186234	0.0982556	0	0.113693	0	2.10254	0.142245	0.554059
PcyM_0401400	0.31988	0.575484	0.155253	0.417258	0	0	0.366969	0		0.0840138	0.221625	0.463261	0.256445	0.305268	0	0.15282	0.256244
PcyM_0401500	0.0842081	0.398192	0.00697242	0.0144075	1.2924	0	0.125945	0.646202		8.10815	24.3658	37.9056	55.6324	87.5833	25.2728	16.237	51.5985
PcyM_0401600	0.222207	0.589347	0.422131	0.655199	0	0	0.472221	0		0.690691	0.624691	6.28712	5.18033	6.81191	12.6992	0.657691	7.74464
PcyM_0401700	0.00419253	0.00153915	0.0277369	0.0593667	0	0	0.0232088	0		1.36643	2.88368	11.0508	8.175	13.4055	53.3765	2.12506	21.502
PcyM_0401800	0.162001	0.00673538	0.00322317	0.0130921	0	0	0.0462629	0		0.51007	0.400879	1.00865	2.31931	1.2654	8.43533	0.455475	3.25717
PcyM_0401900	0.0189152	0.0282853	0.0168732	0.061719	0	0	0.0314482	0		0.110152	0	0.639357	0.254826	0.758351	22.1588	0.0550759	5.95284
PcyM_0402000	0.244643	1.79843	0.924737	1.00995	0.00413618	0.180339	0.994439	0.0922376		1.06617	0.803578	1.95966	2.13997	2.07535	6.5343	0.934875	3.17732
PcyM_0402100	0.0822284	0.0476054	0.0185185	0.0340287	0.0218002	0.0281628	0.0455952	0.0249815		24.1543	16.9811	35.6838	49.3717	51.1907	36.0106	20.5677	43.0642
PcyM_0402200	0.00918879	0.0153529	0.0308137	0.109751	0	0.107891	0.0412767	0.0539453		19.8342	5.19213	16.9891	21.1388	54.9619	34.1545	12.5132	31.811
PcyM_0402300	0.0437979	0.0226097	0.0461544	0.189517	0.14092	0	0.0755197	0.0704601		14.5106	1.8252	16.7209	20.5329	88.6896	55.7645	8.16791	45.427
PcyM_0402400	0.00917832	0.171343	0.00731303	0.0207502	0	0	0.0521461	0		8.8987	3.88007	8.11048	15.7139	28.0582	31.2187	6.38939	20.7753
PcyM_0402500	13.8111	0.00268963	0.85938	0.024832	0.21956	0.465348	3.6745	0.342454		82.7032	77.7881	79.0501	78.7782	55.0825	38.5398	80.2456	62.8627
PcyM_0402600	0.646449	13.8599	0.244272	0.745095	0.23968	0.532182	3.87394	0.385931		110.079	136.677	95.99	100.253	130.133	113.482	123.378	109.965
PcyM_0402700	0.19907	33.1059	12.0288	5.1987	0.600436	0.3232	12.6331	0.461818		50.3625	45.0854	39.1345	55.6823	100.3	67.1821	47.724	65.5747
PcyM_0402800	0.162418	0.446414	0.0710127	0.441173	0.0144401	1.14259	0.280254	0.578516		23.1602	23.8635	22.2982	21.2084	33.5612	0	23.5119	19.267
PcyM_0402900	0.258349	12.8614	6.5228	8.52492	0.111595	0.337887	7.04188	0.224741		61.7783	63.5163	59.5407	56.9334	56.2006	63.6626	62.6473	59.0843
PcyM_0403000	1.03811	2.84248	1.51573	1.32236	0	0.093272	1.67967	0.046636		8.10997	6.33216	3.53984	10.6175	13.4937	0.229584	7.22106	6.97015
PcyM_0403100	0.0743028	0.299271	0.445222	0.534655	1.38031	0	0.338363	0.690155		13.6745	18.871	15.5707	14.3657	29.0711	7.43868	16.2727	16.6115
PcyM_0403200	0.624365	16.2922	4.18125	2.20359	1.66386	0.623731	5.82535	1.14379		165.493	179.158	136.506	129.43	235.632	165.611	172.325	166.795
PcyM_0403300	27.776	26.39	5.27605	6.75843	0.354041	0.8004	16.5501	0.57722		112.554	117.262	120.879	122.037	139.832	106.411	114.908	122.29
PcyM_0403400	0.316738	0.341191	0.338648	0.405587	0.179031	0.274649	0.350541	0.22684		20.486	44.3151	26.1498	20.2427	3.4601	29.8269	32.4005	19.9199
PcyM_0403500	0.339268	30.7688	19.1521	9.62907	0.00831836	0.151118	14.9723	0.0797182		90.8774	91.3091	65.6853	73.5532	147.009	47.2624	91.0933	83.3776
PcyM_0403600	102.585	95.3787	23.9796	14.3935	0.0538926	0.391622	59.0842	0.222758		61.0153	55.6862	51.8551	52.2862	44.3336	56.0124	58.3507	51.1219
PcyM_0403700	9.36296	24.2778	0.337722	1.1545	0.784319	0.82325	8.78324	0.803785		94.6588	118.685	88.6725	87.571	160.426	111.346	106.672	112.004
PcyM_0403800	3.63366	0.580059	0.194721	2.39252	0.108518	0.146032	1.70024	0.127275		34.0158	47.9571	37.5204	34.4545	31.1011	38.069	40.9864	35.2863
PcyM_0403900	2.90161	1.71616	0.779681	1.28232	0	0	1.66994	0		11.4084	7.22277	9.08658	6.96462	11.3995	5.15193	9.31558	8.15066
PcyM_0404000	7.72405	0.700495	3.64838	0.901222	1.23945	1.26094	3.24354	1.2502		214.447	182.883	198.085	192.174	266.04	223.899	198.665	220.05
PcyM_0404100	0.160345	0.316024	1.01582	0.126411	0.412871	0.270853	0.40465	0.341862		39.874	33.3109	42.2619	39.919	10.2301	23.4422	36.5925	28.9633
PcyM_0404200	27.5744	1.84822	4.48351	4.51153	5.86258	4.15782	9.60441	5.0102		757.859	624.387	545.485	568.529	1086.62	494.774	691.123	673.853
PcyM_0404300	2.94452	17.3616	2.25905	0.391865	0.297202	0.389943	5.73925	0.343572		77.6475	64.049	58.996	64.4818	69.8665	53.5413	70.8483	61.7214
PcyM_0404400	10.0157	54.6941	9.13825	3.74265	0.444025	0.418264	19.3977	0.431144		67.3566	66.7109	63.6266	57.9471	65.3661	82.0265	67.0338	67.2416
PcyM_0404500	0.160986	0.0827432	0.0332431	0.0853861	1.09551	0.421206	0.0905896	0.75836		59.3604	59.0461	79.4389	100.03	83.3081	65.3041	59.2032	82.0203
PcyM_0404600	1.0759	1.39159	0.1692	0.423553	0	0.153604	0.76506	0.076802		52.7355	65.1595	54.3665	47.519	79.6634	38.6732	58.9475	55.0555
PcyM_0404700	8.29962	0.527459	4.34309	1.3797	0.350633	0.21233	3.63747	0.281482		52.4836	64.8411	54.496	57.512	70.5899	48.86	58.6624	57.8645
PcyM_0404800	0.0388739	0.802073	0.0590238	0.496116	0.606217	0.428284	0.349022	0.517251		79.1649	71.9741	79.1492	74.7014	132.596	84.0241	75.5695	92.6178
PcyM_0404900	23.1402	30.2312	15.6042	16.1933	0.378755	0.324925	21.2922	0.35184		93.0783	101.678	87.2327	75.9607	57.4231	69.4369	97.378	72.5133
PcyM_0405000	5.14973	0.343039	5.79219	0.304011	2.47308	2.04078	2.89724	2.25693		347.392	307.115	303.19	297.586	118.927	266.716	327.254	246.605
PcyM_0405100	51.2926	23.4379	1.3019	5.55475	0	0.195225	20.3968	0.0976125		22.9517	20.9126	21.1334	17.2729	8.62716	20.6998	21.9321	16.9333
PcyM_0405200	0.12114	0.00607501	0.020748	0.03898	0.00286895	0.167941	0.0467358	0.085405		10.0422	15.9844	12.0272	12.3998	2.5769	12.8107	13.0133	9.95365
PcyM_0405300	0.0356392	0.114298	0.0657755	4.84583	0.252657	0.389452	1.26539	0.321054		63.6791	59.8124	80.1969	94.6253	29.5658	42.8286	61.7458	61.8042
PcyM_0405400	0.0715793	0.0463846	0.4793	0.120688	0.125799	0.25393	0.179488	0.189865		37.5741	53.6668	33.6859	33.8838	21.0661	45.6164	45.6204	33.563
PcyM_0405500	0.0721979	0.0416448	0.492815	0.16969	0	0	0.194087	0		21.437	29.1598	19.2632	19.7758	30.2914	21.5128	25.2984	22.7108
PcyM_0405600	8.02882	0.0789696	7.07753	0.0631356	0.0567495	0.206191	3.81211	0.131471		47.1933	67.6627	64.3489	69.1188	68.5492	34.7774	57.428	59.1986
PcyM_0405700	0.531529	0.0467739	3.70881	0.106503	0.33827	0.326231	1.0984	0.332251		41.1327	57.2758	63.9437	44.5313	7.07783	33.5954	49.2042	37.287
PcyM_0405800	0.114634	0.0568928	0.0250835	0.00965502	0.985612	0.602531	0.0515664	0.794072		96.6369	80.6127	86.6522	91.7342	105.78	79.002	88.6248	90.7921
PcyM_0405900	30.952	4.53975	4.97906	1.56661	0.361475	0.802614	10.5094	0.582044		84.7988	69.9816	68.9617	73.1765	23.2125	67.4702	77.3902	58.2052
PcyM_0406000	27.3212	1.14574	4.82031	1.55349	0.393393	0.323739	8.71019	0.358566		38.63	44.1652	25.9688	26.8583	76.0303	24.2291	41.3976	38.2716
PcyM_0406100	5.61003	4.10568	4.09909	0.590194	0.421525	0.907585	3.60125	0.664555		54.0401	60.5609	58.9392	53.6389	51.3522	53.2217	57.3005	54.288
PcyM_0406200	3.79849	0.150373	0.038185	0.0983147	0.168167	0.174023	1.02134	0.171095		66.1309	70.9865	62.3538	53.4468	14.3895	70.7609	68.5587	50.2378
PcyM_0406300	0.499353	0.123372	7.21184	0.0835116	0.0541196	0.0218485	1.97952	0.037984		19.1544	16.9787	17.4604	14.604	18.2373	18.9335	18.0666	17.3088
PcyM_0406400	0.060422	0.334703	0.0506113	0.194854	0	0.199107	0.160148	0.0995535		32.7915	29.9432	40.6964	52.0998	76.3777	62.4609	31.3674	57.9087
PcyM_0406500	14.1552	0.00444577	7.49758	2.79437	0.939786	0.288759	6.11289	0.614272		31.6129	27.9855	42.51	49.6157	22.7629	33.8662	29.7992	37.1887
PcyM_0406600	0.0379664	0.0498222	0.0130019	0.0120022	0.336293	0.546007	0.0281982	0.44115		91.7089	76.8032	93.1171	82.9696	12.0824	74.8572	84.2561	65.7566
PcyM_0406700	0.366268	0.170433	0.0277315	0.161634	0.516069	0.486128	0.181517	0.501099		76.9922	70.4309	87.3649	101.787	53.1377	64.2759	73.7116	76.6414
PcyM_0406800	0.112128	0.0962296	0.0251853	0.219252	0.240481	0.437093	0.113199	0.338787		66.1699	47.8454	51.3083	50.6572	33.716	58.7514	57.0077	48.6082
PcyM_0406900	4.20959	7.00813	0.176918	0.124586	0.309907	0.166816	2.8798	0.238362		57.2713	63.9006	61.7904	63.1386	23.2499	63.3768	60.586	52.8889
PcyM_0407000	0.317729	0.653646	0.28137	0.821056	0	0.240539	0.51845	0.12027		17.3939	23.3335	27.2618	26.6702	18.3725	33.1857	20.3637	26.3726
PcyM_0407100	0.885614	3.18387	1.30825	2.12487	0	0.0121853	1.87565	0.00609266		0.92182	0.477813	1.10974	1.10576	4.93606	0	0.699816	1.78789
PcyM_0407200	0.0911079	0.133128	0.0362479	0.0123009	0	0.138163	0.0681961	0.0690813		17.2765	16.7455	29.4551	24.2205	42.1875	8.43134	17.011	26.0736
PcyM_0407300	0.0970626	0.0651918	0.0145298	0.0830695	0.66067	0.704005	0.0649634	0.682337		198.688	159.25	175.829	157.201	181.192	251.566	178.969	191.447
PcyM_0407400	3.76761	1.35009	0.680663	0.384829	0.198584	0.0601274	1.5458	0.129356		24.6463	44.0823	77.4512	84.1386	18.2674	66.9639	34.3643	61.7053
PcyM_0407500	8.03181	0.278288	44.9102	35.25	0	0.396769	22.1176	0.198384		22.4518	40.8506	28.5381	27.8221	87.6677	31.4008	31.6512	43.8572
PcyM_0407600	0.0253955	0.00688533	0.0165741	11.9214	0	0.399027	2.99258	0.199514		50.3614	48.1067	46.9567	46.8471	11.134	30.0632	49.2341	33.7502
PcyM_0407700	0.00376169	0.0231211	0.0759106	0.0523705	0.146406	0.35463	0.038791	0.250518		77.6785	119.042	97.6284	91.3628	171.587	56.3573	98.3604	104.234
PcyM_0407800	11.7095	0.15977	0.0803646	1.0141	0	0.426486	3.24094	0.213243		25.2179	33.5989	53.7923	64.0632	69.6317	60.3483	29.4084	61.9589
PcyM_0407900	0.0238012	0.00155678	0.0108576	0.00192517	0	0.103919	0.00953517	0.0519595		11.8486	21.7636	21.115	24.6114	1.32878	24.6399	16.8061	17.9238
PcyM_0408000	7.83509	0.0291305	0.136751	0.479426	0.922667	0.260741	2.1201	0.591704		59.3674	68.1835	56.5959	50.5487	40.9226	68.6662	63.7755	54.1834
PcyM_0408100	35.1474	22.669	45.594	58.2381	0.503299	0.541827	40.4121	0.522563		128.91	136.969	108.939	109.337	92.1794	153.571	132.939	116.006
PcyM_0408200	7.50718	0.445766	0.0599781	0.0380423	0.171899	0.387089	2.01274	0.279494		33.358	34.3389	42.0215	34.1044	17.4327	34.1062	33.8484	31.9162
PcyM_0408300	0.145134	1.47234	0.328095	0.477177	1.06566	0.664877	0.605685	0.865269		84.7816	89.5764	75.0421	80.5807	144.747	77.1203	87.179	94.3725
PcyM_0408400	0.57441	3.85212	0.452849	2.47998	0	0	1.83984	0		0.819892	0.865137	2.26049	1.75185	1.86194	0	0.842514	1.46857
PcyM_0408500	0.0843574	0.0701763	0.0497803	0.0280671	0.384026	0.295995	0.0580953	0.34001		67.5811	74.1405	64.5945	63.0487	32.9029	41.2959	70.8608	50.4605
PcyM_0408600	0.564091	8.82862	1.63609	0.306606	1.63017	1.71624	2.83385	1.6732		296.222	259.155	231.099	225.756	289.161	251.572	277.689	249.397
PcyM_0408700	0.117324	0.312318	0.201189	0.08363	0.0946398	0.334309	0.178615	0.214474		54.8942	54.9045	55.0569	49.8789	9.0868	29.9095	54.8993	35.983
PcyM_0408800	0.199929	0.862251	1.23022	1.63406	0.400082	0.0646063	0.981615	0.232344		40.8147	44.5064	49.0096	45.8526	42.6268	71.4593	42.6605	52.2371
PcyM_0408900	0.0652615	0.453205	0.0822944	0.106606	0.437915	0.526467	0.176842	0.482191		75.9859	68.2992	62.5968	68.6459	56.3674	67.267	72.1425	63.7193
PcyM_0409000	0.0485466	0.034886	0.00266479	0.0268214	0.0618685	0.124884	0.0282297	0.093376		35.049	46.2762	40.0396	33.5523	4.06238	60.6344	40.6626	34.5722
PcyM_0409100	0.0721432	0.819637	0.680751	0.181186	0	0	0.438429	0		16.8069	24.3848	18.0202	17.6349	14.79	72.3408	20.5958	30.6965
PcyM_0409200	0.447093	0.37886	8.74345	0.848915	0.34957	0	2.60458	0.174785		5.48275	7.04299	7.30614	5.82108	2.16541	9.68855	6.26287	6.24529
PcyM_0409300	0.322578	0.0598378	3.17876	0.0704549	0.580168	0.117109	0.907909	0.348639		21.5619	32.7709	20.3611	21.4958	35.5791	40.6707	27.1664	29.5267
PcyM_0409400	2.68512	5.46744	1.76633	2.46988	0.401235	0.404953	3.09719	0.403094		71.8572	68.1723	69.688	67.3778	81.9576	83.8668	70.0147	75.7225
PcyM_0409500	1.97541	9.01346	0.928541	2.94875	1.54028	0.837069	3.71654	1.18868		104.659	102.967	117.42	114.286	171.523	155.093	103.813	139.58
PcyM_0409600	12.7179	15.5431	4.41585	0.887133	0.530666	1.27609	8.391	0.903378		180.917	178.627	157.55	175.994	269.515	172.533	179.772	193.898
PcyM_0409700	22.6475	29.7831	12.4576	10.0611	0.569254	1.89594	18.7373	1.2326		192.444	186.782	160.241	190.059	313.835	200.721	189.613	216.214
PcyM_0409800	0.194944	1.0395	0.480715	0.0715517	0.652588	0.764017	0.446678	0.708303		114.658	126.566	113.45	124.807	186.278	86.5155	120.612	127.763
PcyM_0409900	0.0245372	0.0115867	0.0983363	0.04682	1.1058	0.401776	0.0453201	0.753787		118.992	114.897	98.3141	99.5269	177.959	99.946	116.944	118.937
PcyM_0410000	0.132165	0.0739251	0.0664432	0.0679243	0.369514	0.237324	0.0851144	0.303419		71.0508	69.9125	73.7504	74.6773	34.6161	50.3875	70.4817	58.3578
PcyM_0410100	0.0256248	0.594064	0.0553807	1.08076	0	0.351038	0.438958	0.175519		25.9419	34.8817	22.3425	25.1583	50.9009	20.4178	30.4118	29.7049
PcyM_0410200	0.170693	0.0431867	1.66846	17.4721	0.297339	0.460144	4.8386	0.378741		33.7768	31.2072	34.8253	30.9251	11.4809	39.2207	32.492	29.113
PcyM_0410300	1.73414	14.1848	0.763817	0.39093	0.98578	0.687396	4.26842	0.836588		114.518	115.104	109.046	99.2753	59.8983	108.596	114.811	94.2038
PcyM_0410400	0.193021	0.0495831	38.2829	4.40306	0.479717	0.542262	10.7321	0.51099		68.3049	66.8965	53.1644	63.8266	72.626	34.7164	67.6007	56.0834
PcyM_0410500	0.480984	4.06428	3.46875	2.0116	0.0910809	0.154434	2.5064	0.122757		29.4402	58.9446	33.2893	26.7089	35.2828	36.8557	44.1924	33.0342
PcyM_0410600	7.12057	2.67103	0.100329	2.77765	0.388566	0.382362	3.1674	0.385464		60.3345	74.9139	52.4304	42.993	36.7288	66.6165	67.6242	49.6922
PcyM_0410700	0.130493	0.405341	0.048324	0.0849508	0.778172	0.589037	0.167277	0.683604		142.016	115.382	97.7935	120.997	177.209	160.183	128.699	139.046
PcyM_0410800	2.01307	7.02398	4.00616	0.370104	2.17204	1.67637	3.35333	1.9242		193.79	206.274	195.003	159.012	180.056	206.665	200.032	185.184
PcyM_0410900	0.015012	0.00767975	0.0151714	0.0247526	0.286089	0.222108	0.0156539	0.254099		30.8924	40.7597	39.2059	36.1147	2.45379	27.3115	35.8261	26.2715
PcyM_0411000	0.358574	1.46836	0.624289	0.941008	0.341495	0.249215	0.848059	0.295355		68.0611	62.6597	74.1918	69.9176	36.1308	61.3104	65.3604	60.3877
PcyM_0411100	7.40488	38.1379	33.7964	23.6743	0.769368	0.480017	25.7534	0.624693		46.5038	127.53	121.71	103.861	55.977	111.248	87.0169	98.1991
PcyM_0411200	1.09796	6.62914	1.72612	5.1984	0.321726	0.493556	3.6629	0.407641		38.2182	52.8746	54.255	45.8863	20.2482	30.3172	45.5464	37.6767
PcyM_0411300	0.263683	0.368669	0.524305	0.0306176	0.799627	0.211499	0.296819	0.505563		53.463	52.141	53.5483	56.6872	30.9153	51.7117	52.802	48.2156
PcyM_0411400	0.0821889	0.125834	2.37482	0.91552	0.468292	0.70503	0.874591	0.586661		70.0518	66.0147	58.566	66.7896	104.863	100.928	68.0333	82.7865
PcyM_0411500	1.25699	0.466614	0.145757	0.0161307	0.396436	0.274361	0.471372	0.335398		65.2965	78.8126	58.0218	60.0736	67.0762	60.1694	72.0546	61.3352
PcyM_0411600	0.0261587	0.0125769	0.0407417	0.740121	0.0435039	0.12294	0.2049	0.0832217		28.6972	49.522	45.8033	52.0322	22.8253	57.3394	39.1096	44.5001
PcyM_0411700	19.3224	0.678844	0.180449	3.54906	0.877389	1.54733	5.93268	1.21236		197.996	174.68	148.193	152.025	268.393	160.907	186.338	182.379
PcyM_0411800	5.89594	19.9593	6.28924	11.9343	0.546516	0.514808	11.0197	0.530662		59.1978	58.9873	59.1386	61.8844	93.3239	44.319	59.0925	64.6665
PcyM_0411900	6.06243	5.30615	2.89135	1.44624	1.33988	0.710504	3.92654	1.02519		83.4585	74.8568	89.0246	96.6431	151.573	85.4992	79.1577	105.685
PcyM_0412000	0.0228308	1.1048	2.96935	1.63587	0.128408	0.172798	1.43321	0.150603		29.9187	23.4688	19.529	19.2444	16.81	27.9441	26.6938	20.8819
PcyM_0412200	1.13933	0.183751	1.04823	1.16604	1.40236	1.49157	0.884338	1.44697		229.145	161.088	186.035	192.643	342.299	180.717	195.117	225.423
PcyM_0412300	2.16339	4.76045	1.44837	5.26892	0	0	3.41028	0		40.6795	36.4277	49.3081	28.1901	3.99488	13.902	38.5536	23.8488
PcyM_0412400	0.206901	0.0660019	0.0265261	0.1268	0.336114	0.271383	0.106557	0.303749		74.4532	58.5889	57.7162	51.9123	17.1423	39.5913	66.521	41.5905
PcyM_0412500	2.44822	18.2085	2.72667	1.98096	0.596575	0.331157	6.34107	0.463866		53.7763	52.9342	75.3791	91.7674	76.9583	53.1628	53.3552	74.3169
PcyM_0412600	0.0446832	0.145031	0.257766	0.515891	0.162906	0.10961	0.240843	0.136258		18.4779	37.2368	49.4598	140.361	165.596	38.7958	27.8573	98.5532
PcyM_0412700	0.307544	0.00329591	0.0555971	0.0354558	0	0.281771	0.100473	0.140886		32.8075	25.6577	26.3781	20.3559	8.25726	20.2917	29.2326	18.8207
PcyM_0412800	13.0046	0.0577466	4.98923	5.58393	1.54971	1.25125	5.90887	1.40048		132.215	136.91	111.293	116.628	229.538	142.913	134.562	150.093
PcyM_0412900	0.376769	1.74864	10.1097	2.18758	0.241615	0.292625	3.60567	0.26712		38.7193	31.236	39.2347	45.2632	26.0423	32.6145	34.9777	35.7887
PcyM_0413000	0.0706836	0.540614	3.36766	1.00507	0.0485682	0.127447	1.24601	0.0880078		40.5125	52.1416	38.2703	41.4693	52.9806	63.4347	46.3271	49.0387
PcyM_0413100	0.656336	0.344881	0.060768	0.257867	1.84588	1.32153	0.329963	1.58371		111.055	110.708	95.5655	108.34	127.242	17.9563	110.882	87.2758
PcyM_0413200	1.52664	0.397044	0.315669	0.571517	5.47412	3.13075	0.702717	4.30243		402.682	320.202	341.539	384.943	779.304	361.034	361.442	466.705
PcyM_0413300	0.0654709	0.0463821	0.0221453	0.924157	0.174818	0.141151	0.264539	0.157985		34.0353	48.7757	35.497	41.7014	55.9865	3.36472	41.4055	34.1374
PcyM_0413400	0.0663309	0.0302287	0.049821	0.126399	0.372465	0.169162	0.0681948	0.270814		43.5439	37.5045	41.355	41.2067	41.0687	44.3033	40.5242	41.9834
PcyM_0413500	0.0470819	1.83773	10.0484	0.417869	0.203839	0.0705354	3.08776	0.137187		37.5506	28.4233	48.2659	54.4309	43.9413	39.0983	32.9869	46.4341
PcyM_0413600	0.700355	0.286093	0.380834	4.01353	0	0	1.3452	0		7.65121	9.79519	10.9335	11.4477	16.7081	17.467	8.7232	14.1391
PcyM_0413700	0.0103775	0.0542939	0.222589	0.104059	0.00366587	0.00256143	0.09783	0.00311365		0.337479	0.356102	0.827064	0.961449	1.83936	1.01602	0.34679	1.16097
PcyM_0413800	11.2735	1.76302	0.0665734	4.52711	1.17993	1.77929	4.40756	1.47961		249.019	226.627	192.395	196.223	231.955	180.985	237.823	200.389
PcyM_0413900	38.3813	58.5864	16.4787	26.33	0.899217	1.24032	34.9441	1.06977		116.464	106.923	101.708	95.9886	102.863	119.309	111.693	104.967
PcyM_0414000	0.705576	0.201582	1.14461	2.00481	0.233504	0.606004	1.01414	0.419754		44.8037	50.7658	43.517	36.6294	49.0677	30.225	47.7848	39.8598
PcyM_0414100	0.013291	0.0490046	0.673838	0.0230616	0	0.379355	0.189799	0.189678		52.5786	51.7968	48.3517	53.1712	41.5425	82.0183	52.1877	56.2709
PcyM_0414200	1.13861	0.74493	1.18713	52.0448	0.564891	0	13.7789	0.282445		11.9416	17.0717	19.3529	15.5209	26.594	11.3073	14.5067	18.1938
PcyM_0414300	0.0768445	0.0694539	0.0143537	0.039305	0.0667673	0	0.0499893	0.0333836		2.80218	3.02702	3.96201	3.57171	3.10944	7.40198	2.9146	4.51128
PcyM_0414400	0.044387	0.0172261	0.719835	0.0253508	0.0220531	0.00890299	0.2017	0.0154781		3.95514	3.49106	3.92508	4.0579	1.28461	9.57571	3.7231	4.71083
PcyM_0414500	0.0753562	0.079691	0.0849266	0.12146	0.146862	0.177867	0.0903584	0.162365		41.8621	35.0842	46.3874	46.3434	59.6786	15.1538	38.4732	41.8908
PcyM_0414600	0.197505	0.074984	0.0755232	0.158657	0	0	0.126667	0		30.0634	26.9241	26.9442	27.1442	42.6848	11.4087	28.4937	27.0455
PcyM_0414700	12.2328	7.22076	6.09761	3.81827	3.40921	1.88435	7.34237	2.64678		342.727	258.481	264.707	289.529	533.959	405.581	300.604	373.444
PcyM_0414800	0.538508	2.6468	0.334084	0.363535	0.191832	0.645364	0.970733	0.418598		70.1602	72.1455	71.1708	76.9318	31.7672	45.0937	71.1529	56.2409
PcyM_0414900	28.2815	11.7901	18.6647	12.5022	1.07576	1.1943	17.8096	1.13503		300.771	278.088	201.58	180.934	345.851	245.149	289.43	243.378
PcyM_0415000	22.1979	4.51695	14.9103	13.1428	6.11441	3.62036	13.692	4.86738		847.185	757.255	523.75	534.939	894.37	730.998	802.22	671.014
PcyM_0415100	0.0853821	0.26975	0.130905	0.271446	0.713514	0.672118	0.189371	0.692816		86.3017	88.1359	78.1192	70.893	106.666	52.7346	87.2188	77.1032
PcyM_0415200	0.122082	0.05222	0.466896	0.0112119	0.0883825	0.299717	0.163103	0.19405		55.0989	76.7477	49.9538	43.0022	9.37293	47.304	65.9233	37.4082
PcyM_0415300	48.2481	30.6033	10.4844	15.9621	0.233394	0.384743	26.3245	0.309069		55.5641	52.2294	47.1309	42.2658	33.132	33.0021	53.8968	38.8827
PcyM_0415400	2.6963	0.116777	2.65445	0.93682	0.788013	1.22356	1.60109	1.00579		169.346	155.719	137.589	145.049	111.52	159.182	162.532	138.335
PcyM_0415500	1.06014	0.0773999	4.64805	0.0571515	0.253469	0.0767454	1.46069	0.165107		33.8348	41.4926	42.2019	45.6374	62.0195	66.4453	37.6637	54.076
PcyM_0415600	1.73778	3.71464	3.16228	1.02523	0.632325	0.00709093	2.40998	0.319708		18.1462	27.7798	27.4753	38.4467	29.7687	45.7604	22.963	35.3627
PcyM_0415700	0.0110665	0.040608	0.0378204	0.0727582	1.1679	0.471491	0.0405633	0.819697		58.3379	57.7755	64.1655	76.3336	86.0914	79.1246	58.0567	76.4288
PcyM_0415800	0.439164	0.101404	0.156266	0.286363	0	0	0.245799	0		0.185927	0.78475	0.227827	0.227011	0	0	0.485338	0.113709
PcyM_0415900	0.676073	0.471518	0.438269	27.1748	0.58096	0.469075	7.19017	0.525017		38.4285	46.123	46.846	54.6593	35.9875	63.5121	42.2757	50.2512
PcyM_0416000	0.0813619	0.115415	0.0111313	0.0536326	0	0	0.0653852	0		6.98964	23.5713	36.054	64.334	10.3071	20.0628	15.2805	32.6895
PcyM_0416100	0.0558379	0.472293	0.73912	0.602778	0	0	0.467507	0		0.550639	2.09169	1.76656	1.32017	0.327398	0	1.32117	0.853534
PcyM_0416200	11.9975	39.7284	25.3097	0.815189	0.0774246	0.39071	19.4627	0.234067		25.4799	32.3868	34.8334	30.8708	2.12625	15.9069	28.9333	20.9343
PcyM_0416300	0.216378	0.96872	0.0896578	9.12087	0.794323	0.518422	2.59891	0.656373		100.353	81.9281	189.415	216.792	98.302	59.5999	91.1406	141.027
PcyM_0416400	0.0589085	0.305289	0.236919	0.492762	5.28079	4.65902	0.273469	4.9699		1212.01	905.616	1077.38	1112.96	213.08	492.984	1058.81	724.1
PcyM_0416500	3.92518	0.875641	0.18572	0.566885	4.03762	4.84303	1.38836	4.44032		1019.91	798.716	935.312	942.603	267.833	473.43	909.314	654.794
PcyM_0416600	0.372635	8.78656	0.50525	2.1708	2.26734	1.01907	2.95881	1.64321		239.209	193.872	489.066	563.878	304.306	190.892	216.541	387.035
PcyM_0416700	0.104769	0.0538804	0.00749075	0.0411322	1.37354	0.991447	0.0518181	1.18249		174.631	151.932	336.146	389.072	68.9391	136.586	163.282	232.685
PcyM_0416800	0.00772133	0.0708473	0.0115577	0.0825624	0.160187	0.0661385	0.0431722	0.113163		12.8079	21.2662	54.2458	57.2059	1.58765	31.3245	17.037	36.0909
PcyM_0416900	0.0559014	0.442571	0.0398442	0.0398091	0	0.00603129	0.144531	0.00301565		4.23812	6.9875	14.2813	19.0813	2.88739	11.969	5.61281	12.0548
PcyM_0417000	0.424999	0.223526	0.0938527	0.234857	0.438209	0.178516	0.244309	0.308362		28.3884	34.6231	110.363	121.424	38.437	16.1936	31.5057	71.6043
PcyM_0417100	0.077161	0.277815	0.0265484	0.0520161	0.535055	0.120003	0.108385	0.327529		19.6258	22.3782	80.7051	91.4197	24.2135	14.0055	21.002	52.5859
PcyM_0417200	0.152614	0.138608	0.0117066	0.0235969	0.22072	0.0793701	0.0816315	0.150045		32.4219	44.2384	118.683	133.976	18.4822	10.1514	38.3301	70.3234
PcyM_0417300	0.0349148	0.146497	0.0170781	0.0102688	0	0.0923694	0.0521897	0.0461847		15.7587	13.8569	32.1833	29.1469	10.7716	24.1326	14.8078	24.0586
PcyM_0417400	1.51906	0.0062555	0.00289986	0.00883623	0.238598	0.173382	0.384264	0.20599		41.3597	47.5222	54.7078	57.5512	55.2769	22.0429	44.441	47.3947
PcyM_0417500	0.0688898	0.353425	0.142032	7.70484	0.767969	0	2.0673	0.383984		15.0825	16.2463	29.9105	33.889	32.3488	53.2118	15.6644	37.34
PcyM_0417600	1.0576	3.0952	1.50635	1.75464	0.495722	0.736829	1.85345	0.616275		49.3545	54.575	57.5773	53.106	15.149	39.4367	51.9648	41.3173
PcyM_0417700	2.15282	3.84904	0.123815	1.35272	0.364409	0.609474	1.8696	0.486942		71.5619	86.807	106.843	122.892	83.5643	65.8359	79.1845	94.7839
PcyM_0417800	0.595947	0.502904	0.0492798	0.206206	0.17285	0	0.338584	0.0864252		19.0951	21.6426	25.0232	28.0636	8.77991	6.38753	20.3689	17.0636
PcyM_0417900	0.421656	0.824468	0.137211	1.32549	0.122936	0.349321	0.677206	0.236129		25.5738	43.699	82.3861	90.5864	67.7761	22.5258	34.6364	65.8186
PcyM_0418000	3.88292	87.0981	45.3956	56.4371	0.639584	0.23625	48.2034	0.437917		69.2132	63.9283	69.5039	68.5239	55.7924	66.3513	66.5707	65.0429
PcyM_0418100	0.758622	1.23031	0.313995	0.889299	0	0	0.798056	0		4.00123	6.00086	8.36236	7.63802	3.0996	0	5.00104	4.775
PcyM_0418200	0.340812	0.933987	11.2495	3.8775	0.583959	0.314331	4.10044	0.449145		114.022	98.6047	86.2056	94.4862	185.693	116.291	106.314	120.669
PcyM_0418300	0.770953	14.4987	72.9353	11.8273	0.0074952	0.369835	25.0081	0.188665		29.2725	39.3165	33.5696	30.4694	64.5691	16.8011	34.2945	36.3523
PcyM_0418400	0.0466565	0.10637	0.995141	0.190085	0.167437	0.112659	0.334563	0.140048		18.7825	23.8802	22.6655	23.5717	15.1775	19.7226	21.3313	20.2843
PcyM_0418500	2.64186	0.0262142	0.0399443	0.244798	0.0802682	0.248437	0.738205	0.164353		26.6568	22.4869	21.9102	22.656	13.3918	20.8873	24.5719	19.7113
PcyM_0418600	0.394519	1.03968	0.302514	0.532199	0	0.259714	0.567227	0.129857		37.7333	37.6112	31.6087	27.987	16.538	28.8501	37.6723	26.2459
PcyM_0418700	0.131216	0.21357	0.0577378	0.139645	0.0651003	0.157688	0.135542	0.111394		17.6686	26.6545	42.2317	57.1117	33.2289	28.8687	22.1616	40.3602
PcyM_0418800	0.253023	0.179376	0.300407	0.0858957	1.1155	0.18764	0.204675	0.651572		62.7251	59.0963	51.9363	58.4354	132.787	74.7157	60.9107	79.4685
PcyM_0418900	0.223462	4.57818	7.28188	2.65739	0.0968636	0.297597	3.68523	0.19723		52.9133	70.2432	62.9496	57.9339	22.514	70.0274	61.5783	53.3563
PcyM_0419000	0.874303	9.98787	4.02342	7.32035	0.716266	0.793512	5.55149	0.754889		190.671	164.731	179.806	188.341	159.254	176.819	177.701	176.055
PcyM_0419100	2.00469	0.457769	20.6418	25.7952	1.42109	1.29409	12.2249	1.35759		154.81	150.956	176.487	220.892	305.572	157.546	152.883	215.124
PcyM_0419200	14.1541	12.8115	14.0704	19.4338	0.936734	0.692022	15.1175	0.814378		93.0807	90.3775	93.6895	112.427	182.926	103.417	91.7291	123.115
PcyM_0419300	0.0491802	0.011059	0.00471512	0.0617523	0.230682	0.353885	0.0316766	0.292283		35.5829	37.4137	43.1006	35.8012	5.60151	43.298	36.4983	31.9503
PcyM_0419400	3.09224	77.8568	18.3434	3.48196	1.55587	0.967639	25.6936	1.26176		194.543	177.477	173.755	187.02	261.333	180.678	186.01	200.697
PcyM_0419500	2.19838	0.477554	3.62955	0.120207	0	0	1.60642	0		12.1744	14.3143	17.4753	16.1386	4.4236	54.5857	13.2443	23.1558
PcyM_0419600	0.243977	0.773819	0.173307	0.7823	0	0.00979068	0.493351	0.00489534		0.929328	3.26871	4.93463	5.29516	0.562792	23.0822	2.09902	8.4687
PcyM_0419700	0.215512	0.00376421	0.0574159	0.0639835	0.000720729	0	0.0851689	0.000360365		0.442334	0.513418	0.788447	0.621514	0.281267	0.0998772	0.477876	0.447776
PcyM_0419800	0.117215	0.060914	0.0507672	0.137113	0	0.0734645	0.0915023	0.0367323		7.65241	7.90011	7.35098	7.37365	5.18532	8.9663	7.77626	7.21906
PcyM_0419900	0.535775	0.0276485	0.0198748	0.0998471	0.175006	0.211954	0.170786	0.19348		30.0142	53.0151	47.3449	43.2034	9.21464	22.3657	41.5147	30.5322
PcyM_0420000	1.79556	0.744239	7.06475	0.873882	0.696827	0.993976	2.61961	0.845401		77.123	76.2583	107.196	83.153	61.4093	85.6924	76.6906	84.3626
PcyM_0420100	0.398766	3.86735	6.55488	0.47345	0.189974	0.402643	2.82361	0.296309		58.1508	60.0612	66.705	72.6214	81.846	39.5991	59.106	65.1929
PcyM_0420200	0.203306	0.089872	0.024861	0.0242565	0.306121	0.170172	0.0855738	0.238146		34.8223	48.5559	49.0806	36.575	3.79252	40.4773	41.6891	32.4813
PcyM_0420300	0.0173112	0.00162801	0.0314253	0.0665008	0.174395	0.176012	0.0292163	0.175203		29.85	36.5795	37.4877	38.8417	19.0131	18.9311	33.2148	28.5684
PcyM_0420400	0.275634	0.13034	0.238129	0.511293	0	0	0.288849	0		0	0	0.781095	0	0	0.0224894	0	0.200896
PcyM_0420500	0.00719711	0.0621833	2.34399	0.0446706	0	0.187013	0.614509	0.0935064		7.68675	8.8887	8.13026	13.1136	8.9912	15.4543	8.28773	11.4223
PcyM_0420600	0.421251	10.7887	15.8223	15.8028	0.455822	0	10.7088	0.227911		27.3535	24.9305	17.9602	25.8073	59.2953	22.4593	26.142	31.3805
PcyM_0420700	15.0384	0.103076	8.12217	3.34324	0.917887	0.688177	6.65173	0.803032		134.181	137.472	122.992	150.036	279.053	168.69	135.827	180.193
PcyM_0420800	0.696236	0.500192	7.40369	0.608676	0.401388	0.324086	2.3022	0.362737		45.1631	46.789	44.6322	49.4613	108.904	38.3184	45.9761	60.329
PcyM_0420900	0.0560257	0.00058206	0.00890469	0.0140333	0.0797422	0.0505882	0.0198865	0.0651652		11.8389	18.6604	24.2162	20.6105	6.18159	12.4625	15.2496	15.8677
PcyM_0421000	0.0390904	0.0317569	0.0204558	0.0296891	0.369108	0.0894068	0.030248	0.229257		24.1635	18.2197	19.5543	20.7135	9.96887	36.0325	21.1916	21.5673
PcyM_0421100	1.01837	0.0291263	0.0956524	0.0429742	0.145205	0.42672	0.29653	0.285962		79.9265	79.2379	69.6751	70.5254	88.8689	77.9734	79.5822	76.7607
PcyM_0421200	0.15436	0.0602283	0.0151945	5.46507	0.510347	0.0343384	1.42371	0.272343		27.7834	32.0096	30.9884	33.1435	22.5509	30.7775	29.8965	29.3651
PcyM_0421300	0	0.00785423	0.238639	0.0107946	0.193111	0.701641	0.064322	0.447376		48.5924	63.9188	51.475	44.6983	41.3893	42.2228	56.2556	44.9463
PcyM_0421400	0.324681	0.337945	0.11826	0.507695	0	0	0.322145	0		8.91236	13.551	16.124	16.2288	10.9131	57.0594	11.2317	25.0813
PcyM_0421500	7.26855	1.97969	1.16822	3.09653	0.0327467	0	3.37825	0.0163734		0	0	0.0362159	0	0	0	0	0.00905398
PcyM_0421600	0.348606	0.142932	0.0828018	0.0658102	0.582158	2.23722	0.160038	1.40969		95.4754	99.9762	92.1825	107.12	126.577	77.5369	97.7258	100.854
PcyM_0421700	11.0349	18.7564	9.77507	5.15276	1.76604	0.606017	11.1798	1.18603		98.0905	93.7187	96.5109	100.539	202.385	107.683	95.9046	126.779
PcyM_0421800	0.314264	0.0312415	2.36731	0.0339535	0.591306	0.358071	0.686693	0.474688		70.766	67.509	83.358	81.7879	16.8491	82.3213	69.1375	66.079
PcyM_0421900	0.00279915	0.0225629	7.17259	0.233125	0	0	1.85777	0		13.9149	21.6832	18.356	18.8928	18.0277	35.8832	17.7991	22.7899
PcyM_0422000	1.09669	4.2367	1.43286	2.1882	0.165524	0.201452	2.23861	0.183488		29.4602	48.8923	33.9901	42.654	43.8843	35.1078	39.1763	38.909
PcyM_0422100	0.355067	0.00669135	3.14405	2.23865	0.23982	0.968675	1.43612	0.604248		74.7374	58.155	66.9316	71.4173	103.197	82.8403	66.4462	81.0966
PcyM_0422200	0.196495	0.316616	0.118738	0.305207	1.13809	0.722002	0.234264	0.930047		109.207	105.992	120.039	137.941	211.094	106.144	107.6	143.805
PcyM_0422300	65.3621	165.622	64.1005	23.1077	0	0.262942	79.548	0.131471		27.1672	26.7136	28.8751	30.3684	39.9425	41.4521	26.9404	35.1595
PcyM_0422400	11.0936	0.124487	0.105696	0.214237	0.0557019	0.0899489	2.88451	0.0728254		8.47053	18.0162	15.3713	11.664	4.17504	7.67617	13.2434	9.72163
PcyM_0422500	1.66398	1.85117	0.395509	0.991586	0.636366	1.28453	1.22556	0.960445		181.446	61.5876	247.041	331.416	1328.54	339.272	121.517	561.567
PcyM_0422600	0.99166	0.50925	0.189454	0.200335	0	0	0.472674	0		4.76375	2.6456	21.3522	20.2042	29.1524	58.5937	3.70467	32.3256
PcyM_0422700	0.89076	1.23223	0.0936814	0.335131	0	0	0.637952	0		1.73186	4.41629	8.017	3.53011	3.49599	41.2337	3.07407	14.0692
PcyM_0422800	0.391215	0.943052	0.58708	1.97302	0	0	0.973593	0		0	0	0	0	0	0	0	0
PcyM_0422900	0.181426	0.0933247	0.0304486	0.00981812	0.179656	0.108792	0.0787544	0.144224		7.23226	0	31.9006	34.4787	80.4609	93.6378	3.61613	60.1195
PcyM_0423000	0.0912358	0.251315	0.0466443	0.0553555	0	0.101283	0.111138	0.0506416		5.90593	2.70983	8.70127	9.92647	44.4471	33.8011	4.30788	24.219
PcyM_0423100	0.00641591	0.0908715	0.00299889	0.0963179	0	0	0.0491511	0		21.4863	1.79581	19.616	22.8587	99.4735	52.3581	11.6411	48.5766
PcyM_0423200	0.653974	1.09738	0.264144	0.131771	0	0	0.536817	0		1.0663	1.57409	3.34891	5.77793	8.21283	2.60027	1.32019	4.98498
PcyM_0423300	0.365752	0.328933	0.143883	0.42363	0.553773	1.78058	0.31555	1.16718		346.41	8.48954	370.253	393.025	2206.22	1984.97	177.45	1238.62
PcyM_0423400	0.318166	0.353208	0.119938	0.197877	0	0	0.247297	0		1.74369	3.03586	4.56327	3.98932	4.45767	2.78415	2.38978	3.9486
PcyM_0423500	0.041296	0.117168	0.0134609	0.0258362	0	0.0598888	0.0494404	0.0299444		15.0809	19.9637	39.9822	38.2023	84.4688	30.6081	17.5223	48.3154
PcyM_0423600	6.79157	5.85144	1.89772	7.60325	0	0	5.536	0		1.10422	0.116516	2.57082	3.10089	5.01529	25.9301	0.610368	9.15429
PcyM_0423700	0.174917	0.00805564	0.0322473	0.112003	0	0.112072	0.0818056	0.0560358		1.98772	1.39827	2.66763	4.04489	7.6237	22.2272	1.693	9.14085
PcyM_0423800	1.33637	4.80307	1.71034	3.12468	0	0	2.74362	0		0	0	0	0.0102583	0	0	0	0.00256457
PcyM_0423900	0.0445102	0.00928029	0.0230335	0.0626387	0.288349	0.232817	0.0348657	0.260583		6.68549	8.09184	17.728	18.7263	18.9335	1.77595	7.38867	14.2909
PcyM_0424000	0.125769	0.0763649	0.0203368	0.0440936	0	0.0422676	0.0666412	0.0211338		3.89825	9.35679	15.4326	13.782	39.951	6.8998	6.62752	19.0163
PcyM_0424100	0.0599552	0.115968	0.00599879	0.0113089	0	0	0.0483077	0		0.719293	1.26498	4.40696	5.19621	3.92037	4.06033	0.992136	4.39597
PcyM_0424200	0.20435	0.376919	0.253314	0.49813	0	0	0.333178	0		0.00136011	0	0.449987	0.448374	0	0.552792	0.000680054	0.362788
PcyM_0424300	0.0808864	0.0527708	0.0699238	0.554774	0	0	0.189589	0		0.269309	1.70503	1.32	0	0	0	0.987168	0.33
PcyM_0424400	0.0275024	0.0483763	0.0405556	0.2403	0	0	0.0891836	0		0.591659	0.650323	1.08749	0.421398	0.0895758	0	0.620991	0.399616
PcyM_0424500	2.13396	2.45456	1.56571	2.25048	0	0	2.10118	0		0.759826	0.572683	0.997562	0.993987	0.595227	0	0.666254	0.646694
PcyM_0424600	2.98329	14.3515	1.46581	1.417	0.0260046	0.109356	5.05439	0.0676805		21.2069	23.5808	18.9113	16.2225	10.4571	25.9747	22.3939	17.8914
PcyM_0424700	1.56725	0.449982	0.475795	1.57558	0.683512	0.0919795	1.01715	0.387746		21.4407	8.85285	11.4375	9.29523	11.2907	8.41953	15.1468	10.1107
PcyM_0424800	0.374165	0.0643672	0.0670265	0.256668	0.0524486	0	0.190557	0.0262243		0.321894	0.339657	0.262956	0.43669	0	0	0.330775	0.174912
PcyM_0424900	0.24208	1.82566	0.112651	0.427806	0	0	0.652049	0		0	0	0.449876	1.34479	0	0	0	0.448666
PcyM_0425000	0.411529	0.151768	0.200966	0.821236	0	0	0.396375	0		0	0.219491	0.637224	1.39687	0	0.00978506	0.109746	0.510969
PcyM_0425100	0.3858	0.194404	0.138505	0.257441	0	0	0.244037	0		0	0.0152078	0	0.020949	0	0	0.00760392	0.00523725
PcyM_0425200	0.253297	0.0976646	0.169081	1.16561	0	0.00309744	0.421413	0.00154872		0	0	0.179512	0	0	0	0	0.044878
PcyM_0425300	0.0134526	0.0792459	0.00857989	0.0366574	0	0	0.034484	0		0.0714474	0.263866	0.15321	0	0.0757187	0	0.167656	0.0572322
PcyM_0425400	0.0147885	0.0820301	0.0445198	0.0987533	0	0	0.0600229	0		0	0.341793	0	0	0.0294242	0	0.170896	0.00735605
PcyM_0425500	0.0673823	0.618672	0.201949	0.170808	0.00294439	0.000526626	0.264703	0.00173551		0.386511	0.111229	0.559725	0.644666	0.127673	3.09421	0.24887	1.10657
PcyM_0425600	0.273401	0.14269	0.306136	0.961484	0	0	0.420928	0		0	0	0	0	0	0.0189297	0	0.00473243
PcyM_0500100	0.225984	0.353043	0.288977	0.919319	0	0.0176838	0.446831	0.00884191		0	0	0.00994137	0	1.79085	0	0	0.450198
PcyM_0500200	0	0.153366	0.0442771	0.0587682	0	0	0.0641029	0		0	0	0.212345	0	0	0	0	0.0530861
PcyM_0500300	0.426802	1.38909	0.278597	0.545516	0	0.00335108	0.660001	0.00167554		0	0	0	0.511435	0	0	0	0.127859
PcyM_0500400	0.274958	0.689732	0.266058	0.345026	0	0	0.393944	0		0.0396007	0.167144	0	0	0.579673	0	0.103372	0.144918
PcyM_0500500	0.118987	0.12852	0.138665	0.424975	0	0	0.202787	0		0	0	0.00586225	0	0	0	0	0.00146556
PcyM_0500600	1.44844	1.23554	0.614934	0.938247	0	0	1.05929	0		0	0	0	0	0	0	0	0
PcyM_0500700	5.84978	28.9489	8.58376	11.0325	0	0	13.6038	0		0	0.050613	0	0	0	0	0.0253065	0
PcyM_0500800	0.290571	0.0478523	0.316558	0.367499	0	0	0.25562	0		0	0	0	0.138646	0.0038925	0	0	0.0356347
PcyM_0500900	0.0449368	0.0906553	0.0827541	0.10321	0	0	0.0803891	0		0.148369	0.0208742	0.303008	0.221409	0.152433	0.55835	0.0846214	0.3088
PcyM_0501000	0.901361	1.42252	0.42079	0.903139	0	0	0.911953	0		0	0	0.252643	0	0	0	0	0.0631609
PcyM_0501100	0.116394	0.0598058	0.0421417	0.0586997	0	0	0.0692603	0		0.0997723	0.263196	0.0305642	0.243637	0.498474	0	0.181484	0.193169
PcyM_0501200	0.065958	0.284379	0.03952	0.231841	0.101302	0	0.155425	0.0506509		0.27632	0.606804	0.826324	0.857501	0.125503	14.1162	0.441562	3.98138
PcyM_0501300	0.804197	1.62961	0.808671	2.39662	0	0.0125573	1.40977	0.00627866		0	0	0	0	0	1.05367	0	0.263418
PcyM_0501400	0.136034	0.202098	0.0453425	0.16397	0	0	0.136861	0		0.271488	0.9549	1.27523	1.54689	2.21954	0	0.613194	1.26042
PcyM_0501500	0.0766652	0.0149624	0.0167703	0.00464278	0	0	0.0282602	0		0.153446	0.161914	0.219365	0.0624509	0.511091	0.00390129	0.15768	0.199202
PcyM_0501600	0.717108	0.277263	0.261577	0.877257	0	0.000216197	0.533301	0.000108099		0.0540482	0.0285154	0.0662284	0.527928	0	0	0.0412818	0.148539
PcyM_0501700	0.0240821	0.00776725	0.0369804	0.147223	0	0	0.0540131	0		0.0854715	0	0.366566	0.417431	0.232923	1.35094	0.0427358	0.591965
PcyM_0501800	0.621039	3.3125	0.300343	1.24545	0	0	1.36983	0		0.148525	0.0783608	0	0	0.539672	0.670727	0.113443	0.3026
PcyM_0501900	5.1897	7.01881	9.47664	7.688	0	0	7.34329	0		12.6553	0	7.92593	5.37947	23.673	30.9035	6.32765	16.9705
PcyM_0502000	0.00969708	0.0192637	0.00950501	0.0639553	0	0	0.0256053	0		0.912538	1.37557	3.07501	3.10378	1.18419	3.09071	1.14405	2.61342
PcyM_0502100	0.142702	1.25095	0.0796076	0.115987	0	0.150879	0.397312	0.0754394		8.66516	2.95814	21.5481	20.8486	36.1154	80.5641	5.81165	39.7691
PcyM_0502200	0.0321482	0.0199273	0.0233772	0.00754106	0	0	0.0207484	0		3.38995	3.06602	6.40887	10.8797	37.8323	10.2787	3.22798	16.3499
PcyM_0502300	0.036863	0.0534819	0.0115604	0.0586672	0	0.104161	0.0401431	0.0520806		5.27834	0.92827	36.5516	24.9194	48.2673	178.575	3.1033	72.0784
PcyM_0502400	13.481	63.78	13.4103	24.2986	0	0	28.7425	0		18.4268	1.90858	19.1164	20.7042	98.5835	94.4454	10.1677	58.2123
PcyM_0502500	0.55719	0.536288	0.120064	0.21262	0.226406	0.201084	0.356541	0.213745		29.2418	17.627	52.2529	99.0353	187.52	57.7995	23.4344	99.1519
PcyM_0502600	0.500064	0.37995	2.20406	0.837524	0.114365	0.140159	0.980399	0.127262		8.59172	7.07713	15.8636	36.9934	67.0268	5.10674	7.83442	31.2476
PcyM_0502700	0.0859539	0.147399	0.0489931	0.00934309	0	0.0650465	0.0729223	0.0325232		17.3326	4.11576	20.7337	32.2636	78.1494	64.1313	10.7242	48.8195
PcyM_0502800	0.122575	0.115329	0.0481841	0.104406	0.00512184	0	0.0976234	0.00256092		0.101288	0.748145	0.620572	1.2367	0.73607	2.05834	0.424717	1.16292
PcyM_0502900	0.110332	1.97465	1.27657	2.83862	0.335518	0.338627	1.55004	0.337073		35.1205	52.1023	57.6372	60.8294	101.788	83.3043	43.6114	75.8897
PcyM_0503000	206.905	54.6692	101.78	97.2718	164.934	37.5275	115.156	101.231		767.573	1026.39	793.688	670.274	2011.93	330.247	896.981	951.535
PcyM_0503100	469.928	127.942	185.648	205.417	241.305	54.1072	247.234	147.706		991.839	1144.13	938.609	824.415	2689.36	365.786	1067.98	1204.54
PcyM_0503200	688.916	217.41	250.536	222.538	1.58004	0.932278	344.85	1.25616		151.235	172.711	142.286	119.614	502.931	29.9966	161.973	198.707
PcyM_0503300	0.878676	0.496509	0.0681385	0.282773	0	0	0.431524	0		1.97332	0.416442	0	0.96374	2.15104	0	1.19488	0.778694
PcyM_0503400	88.3368	18.7003	75.065	64.0563	8.44365	2.80707	61.5396	5.62536		332.116	417.159	353.255	274.076	431.857	37.4766	374.637	274.166
PcyM_0503500	26.9615	39.5662	74.4054	57.7232	0	0	49.6641	0		14.1273	12.2021	12.1712	8.46442	51.5967	2.30198	13.1647	18.6336
PcyM_0503600	25.1858	22.5309	5.91165	7.22325	1.14375	0.818849	15.2129	0.9813		70.8872	81.1387	91.9997	91.406	115.593	142.105	76.0129	110.276
PcyM_0503700	7.56518	0.279855	0.0792334	1.07368	0.100514	0.081156	2.24949	0.0908348		11.241	15.4053	28.2204	23.5283	32.3795	43.6506	13.3231	31.9447
PcyM_0503800	0.36867	8.0152	0.564641	0.739777	0.428435	0.345924	2.42207	0.38718		72.6885	60.6169	51.9101	54.224	48.9652	36.695	66.6527	47.9486
PcyM_0503900	0.756363	0.994798	7.6481	4.30245	1.447	1.83014	3.42543	1.63857		209.231	198.388	189.575	183.577	299.198	159.911	203.809	208.065
PcyM_0504000	0.147046	3.28457	0.41031	1.34168	0	0.377782	1.2959	0.188891		10.7419	18.1804	11.4685	17.5306	28.6139	10.0861	14.4611	16.9248
PcyM_0504100	0.777411	1.03794	1.05777	0.217676	0.931712	0.82222	0.7727	0.876966		150.233	142.738	123.363	124.014	164.225	145.635	146.486	139.309
PcyM_0504200	0.0461087	28.0017	0.0196201	0.0236835	0.248785	0.261134	7.02277	0.254959		15.8455	26.7985	20.2704	14.1683	5.97945	9.57669	21.322	12.4987
PcyM_0504300	0.280084	0.248983	0.0678773	0.132919	0	0.164599	0.182466	0.0822996		29.4716	37.3567	63.8228	98.8989	114.916	51.4787	33.4141	82.279
PcyM_0504400	0.97272	2.01167	0.676512	0.827386	0.1856	0.0763423	1.12207	0.130971		19.9973	32.8616	52.8598	85.1562	66.6251	54.4409	26.4294	64.7705
PcyM_0504500	0.0736626	0.0834382	0.0335319	0.250332	0	0.21274	0.110241	0.10637		9.34313	16.5892	18.6041	18.4277	22.034	42.5985	12.9662	25.4161
PcyM_0504600	0.266064	0.271031	0.0839972	0.186296	0	0	0.201847	0		9.45282	17.0717	22.6093	39.8406	15.192	14.3662	13.2623	23.002
PcyM_0504700	0.225711	0.0288258	5.33396	0.540942	0.757897	0.356963	1.53236	0.55743		79.8499	66.8961	69.5837	77.1433	123.473	97.4424	73.373	91.9106
PcyM_0504800	0.041326	0.201707	15.0867	0.530794	1.0735	0.849422	3.96513	0.96146		98.329	94.2688	92.8416	93.3664	134.538	92.8613	96.2989	103.402
PcyM_0504900	8.31127	35.2999	2.11866	3.08328	0.441888	0.558138	12.2033	0.500013		121.338	128.168	126.147	143.97	58.1994	112.054	124.753	110.093
PcyM_0505000	63.2657	13.1864	5.1469	2.59303	0.335863	0.325416	21.048	0.330639		36.8857	40.6814	39.459	32.69	40.9442	39.0962	38.7836	38.0474
PcyM_0505100	0.172339	0.298502	3.05546	0.149843	0	0.0998307	0.919035	0.0499153		35.1468	33.6588	29.7004	27.0089	24.047	37.8015	34.4028	29.6395
PcyM_0505200	0.958023	0.571473	15.1052	2.27265	0	0.357867	4.72684	0.178933		19.7211	21.1263	19.7494	21.512	20.7334	42.043	20.4237	26.0094
PcyM_0505300	30.7571	39.5197	19.793	13.1154	3.87563	4.27765	25.7963	4.07664		981.459	987.282	756.325	851.857	1331.86	878.926	984.371	954.741
PcyM_0505400	0.0205481	0.0559021	0.0127953	0.228659	0.156924	0.139372	0.079476	0.148148		28.1115	43.5627	37.869	33.6046	26.5567	37.0168	35.8371	33.7618
PcyM_0505500	0.115051	0.0214803	0.779984	0.0267216	0.118935	0.0480148	0.235809	0.0834748		17.7619	21.2239	35.4794	27.8288	31.9745	28.019	19.4929	30.8254
PcyM_0505600	2.86833	0.104401	3.92733	0.060679	0	0.434933	1.74019	0.217467		34.856	57.8825	48.3125	34.0862	48.495	39.2595	46.3693	42.5383
PcyM_0505700	3.22594	0.173008	0.173939	0.0979247	0.0358851	0.18899	0.917703	0.112438		29.1204	46.4009	32.5694	31.7903	15.2491	42.8221	37.7607	30.6077
PcyM_0505800	7.88974	24.2956	5.56469	95.369	0	0	33.2797	0		6.61535	2.57885	2.27906	1.50541	4.36517	0.0376751	4.5971	2.04683
PcyM_0505900	3.79802	0.269074	0.0757325	0.0904401	0.417961	0.337467	1.05832	0.377714		35.9122	58.2455	45.9843	39.1496	31.5865	28.102	47.0789	36.2056
PcyM_0506000	90.7087	0.320706	1.15637	0.283892	0.254254	0	23.1174	0.127127		17.446	16.0625	14.8866	15.6624	22.3731	30.1235	16.7542	20.7614
PcyM_0506100	0.00566925	0.00253418	0.0267225	0.0139136	0.158115	0.272011	0.0122099	0.215063		46.8891	58.2229	41.651	45.8132	19.6867	54.9606	52.556	40.5279
PcyM_0506200	0.454386	0.0436443	0.0558238	1.34729	0.16477	0.022173	0.475285	0.0934717		10.8241	12.3045	13.0798	19.0692	5.17139	37.3794	11.5643	18.675
PcyM_0506300	0.231812	0.0490881	0.409174	0.143228	0.362022	0.146151	0.208325	0.254086		26.6288	41.307	34.7449	21.1533	9.41867	28.4287	33.9679	23.4364
PcyM_0506400	0.368329	0.710785	1.62019	0.0650249	0.145587	0.394628	0.691083	0.270107		69.4745	81.4048	68.8379	53.9419	20.8067	70.9012	75.4396	53.6219
PcyM_0506500	0.880973	3.23101	5.60928	0.480591	0.191889	0.077467	2.55046	0.134678		18.4522	21.3326	27.501	22.849	14.0262	27.6257	19.8924	23.0005
PcyM_0506600	0.273062	0.587718	0.522397	2.12427	0	0.00282407	0.876862	0.00141203		6.43989	3.02012	2.63674	4.36827	2.59996	4.847	4.73001	3.61299
PcyM_0506700	0.211543	0.429772	0.0847029	0.170298	0	0.0659106	0.224079	0.0329553		25.05	47.1084	31.6502	22.2956	100.53	17.3456	36.0792	42.9554
PcyM_0506800	33.7805	181.343	29.3383	34.3224	1.34734	1.18455	69.696	1.26594		170.829	157.699	167.608	179.341	252.375	139.538	164.264	184.715
PcyM_0506900	14.3711	1.28556	17.5538	17.6805	0.517238	0.480268	12.7228	0.498753		92.9976	84.0261	89.8465	77.0082	21.0825	63.6737	88.5119	62.9027
PcyM_0507000	0.475503	0.121635	5.83355	1.78324	0.167192	0.17004	2.05348	0.168616		62.9407	46.4374	50.0148	56.4825	106.493	50.8435	54.6891	65.9584
PcyM_0507100	2.85374	0.0206659	0.00825999	0.150443	0.313402	0.231958	0.758278	0.27268		63.8121	71.4867	66.5827	72.8023	92.0855	82.5182	67.6494	78.4972
PcyM_0507200	2.16871	14.3664	4.05206	27.4844	0.417307	0.16847	12.0179	0.292889		48.6902	45.702	44.8655	49.4077	20.9386	64.7692	47.1961	44.9952
PcyM_0507300	0.117804	0.0637583	1.72915	0.474566	0.0911064	0.243158	0.59632	0.167132		41.0467	65.3501	28.931	25.5676	31.6824	43.8541	53.1984	32.5088
PcyM_0507400	1.70984	0.0283633	0.0537361	0.112156	0.113056	0.0456416	0.476023	0.0793489		21.0086	28.9214	27.8458	27.1098	20.0994	21.8469	24.965	24.2255
PcyM_0507500	0.0841989	0.195089	0.0197099	0.0423882	0	0.44612	0.0853464	0.22306		31.6153	33.8886	36.8043	35.664	9.90935	22.93	32.7519	26.3269
PcyM_0507600	0.232862	0.142741	0.0453392	0.0540618	0.189917	0.153342	0.118751	0.171629		16.3226	19.6785	23.4868	26.0908	9.41153	34.5063	18.0005	23.3739
PcyM_0507700	0.0815001	0.683029	0.0300489	0.0805101	0	0	0.218772	0		1.61977	1.3984	2.62235	1.97769	2.40771	0.664979	1.50909	1.91818
PcyM_0507800	0.630542	0.0722687	4.02414	2.26573	0.519128	0.628726	1.74817	0.573927		80.0151	63.8756	71.7912	75.9642	148.567	54.7594	71.9454	87.7704
PcyM_0507900	0.520821	0.0852734	10.2118	0.0883119	0.650476	0.581475	2.72654	0.615976		117.56	150.004	111.387	94.8556	53.0726	133.782	133.782	98.2741
PcyM_0508000	0.845969	0.178306	0.340094	0.59939	0.843511	1.02349	0.49094	0.933498		142.431	129.773	132.063	125.296	215.484	124.685	136.102	149.382
PcyM_0508100	42.2704	70.2439	15.3368	10.8675	1.18352	0.716692	34.6797	0.950105		131.23	154.184	133.706	134.557	255.745	129.021	142.707	163.257
PcyM_0508200	2.94158	15.7121	0.644739	27.3751	0.593979	0.299742	11.6684	0.44686		38.8847	46.2661	60.9865	67.7534	102.103	51.6739	42.5754	70.6293
PcyM_0508300	0.0110539	0.00837326	0.0334992	1.78785	1.05391	0.243125	0.460193	0.648516		55.9547	49.8341	51.3919	62.9285	66.7764	106.638	52.8944	71.9338
PcyM_0508400	0.0886667	5.5436	0.430846	0.235993	0.267401	0.233895	1.57478	0.250648		35.7914	45.5454	38.8409	35.8056	19.0856	37.6079	40.6684	32.835
PcyM_0508500	0.162116	0.65927	3.14337	5.23718	0.407461	0.503493	2.30048	0.455477		75.428	71.685	60.398	68.1432	31.8025	61.1889	73.5565	55.3832
PcyM_0508600	3.49585	3.19634	4.06697	1.75834	0.622961	0.37724	3.12937	0.500101		105.707	142.127	112.872	110.157	59.1488	116.97	123.917	99.787
PcyM_0508700	9.80917	7.91526	2.52124	0.756972	1.20342	0.81897	5.25066	1.0112		95.6726	76.6842	92.1399	116.945	108.667	109.22	86.1784	106.743
PcyM_0508800	0.00877841	0.0654766	2.5251	1.68993	0.361353	0.0972538	1.07232	0.229304		47.9962	41.2555	42.4739	52.551	47.1556	40.0605	44.6259	45.5602
PcyM_0508900	0.192256	0.0844651	2.483	1.33611	1.36008	0.512469	1.02396	0.936275		95.004	93.3309	74.4776	79.1932	41.114	142.963	94.1674	84.4371
PcyM_0509000	154.573	0.188121	0.274269	0.859165	0.83218	0.751087	38.9737	0.791633		76.3337	76.0094	58.3845	60.9864	31.757	88.4868	76.1715	59.9037
PcyM_0509100	0.128795	31.0969	0.0687217	0.292488	1.12458	1.12887	7.89673	1.12672		166.877	147.241	146.775	147.499	50.7972	123.602	157.059	117.168
PcyM_0509200	8.15837	1.64549	0.0565507	2.2837	0.418896	0.135151	3.03603	0.277024		47.5416	62.9123	59.6892	43.727	12.65	43.9145	55.227	39.9951
PcyM_0509300	0.950723	2.49357	2.52319	0.875236	0.412534	0.543075	1.71068	0.477804		125.205	107.36	104.618	101.986	66.1096	98.5207	116.282	92.8087
PcyM_0509400	0.703965	108.133	0.441924	14.0812	0.127513	0.386082	30.8399	0.256797		51.2701	54.5926	51.3614	50.0049	47.0766	58.0179	52.9314	51.6152
PcyM_0509500	0.0874381	0.180415	0.104767	0.152896	0	0.148056	0.131379	0.074028		1.9382	4.61809	7.89107	3.74055	0.113589	3.38815	3.27814	3.78334
PcyM_0509600	0.0961638	0.0274157	20.4615	0.0712767	0	0	5.16408	0		23.4734	26.4055	34.3386	31.1853	28.5557	10.5167	24.9394	26.1491
PcyM_0509700	11.1143	2.06244	3.6225	0.42031	0.305482	0.280284	4.30489	0.292883		113.295	106.801	95.9797	103.632	143.127	90.6953	110.048	108.359
PcyM_0509800	11.6057	0.847898	3.66175	1.27744	3.06281	1.75167	4.3482	2.40724		316.423	234.071	251.03	262.024	606.014	367.846	275.247	371.728
PcyM_0509900	12.7018	5.35412	0.982306	1.94217	0.834433	0.538986	5.2451	0.68671		70.47	65.646	61.8231	66.156	65.8172	73.2349	68.058	66.7578
PcyM_0510000	0.211554	0.214644	0.0360965	0.725446	0.00375537	0.131898	0.296935	0.0678266		21.7969	24.4494	26.2084	27.2933	19.1591	53.6601	23.1232	31.5802
PcyM_0510100	8.39585	8.34384	1.23029	8.66336	0.217196	0.0857773	6.65834	0.151487		34.782	31.8005	31.6059	30.428	35.5366	48.0923	33.2912	36.4157
PcyM_0510200	0.0245716	0.104464	0.084022	0.564073	0.233998	0.125955	0.194283	0.179976		29.0681	31.2615	27.6999	33.5753	18.8434	24.7405	30.1648	26.2148
PcyM_0510300	0.0148579	0.00225868	0.00188555	0.00247665	0.260783	0.514014	0.00536969	0.387398		71.5017	104.107	93.5114	76.992	15.8501	77.7575	87.8041	66.0278
PcyM_0510400	0.368359	0.513844	0.0152172	0.247513	0	0.479511	0.286233	0.239756		70.8273	56.5979	73.5554	97.0264	96.1398	54.0535	63.7126	80.1938
PcyM_0510500	0.0519818	0.00621028	0.026875	0.0633515	0.430498	0.173795	0.0371046	0.302147		59.4473	47.3944	63.3115	90.3257	98.1352	44.4117	53.4209	74.046
PcyM_0510600	0.0530323	0.631109	8.4366	5.07801	1.7304	0.372572	3.54969	1.05148		153.714	141.279	129.747	147.083	192.655	153.38	147.497	155.716
PcyM_0510700	1.51461	0.141935	0.817918	2.66455	0.350693	0.0954573	1.28475	0.223075		25.9673	36.5267	32.8021	29.2962	14.3376	27.584	31.247	26.005
PcyM_0510800	0.45359	0.0631226	0.0168165	0.0769806	0	0.141743	0.152627	0.0708717		12.0928	35.7485	62.8574	90.5864	18.0518	13.3802	23.9206	46.219
PcyM_0510900	75.3761	22.6541	8.6103	14.3676	0.720404	1.16333	30.252	0.941865		239.576	239.847	210.395	202.237	139.172	218.028	239.711	192.458
PcyM_0511000	0.131165	0.208742	2.13809	0.267793	0	0.307184	0.686448	0.153592		30.9442	33.7469	41.1546	38.1274	35.3937	46.1189	32.3456	40.1987
PcyM_0511100	15.7655	0.0203069	0.0190311	0.0769055	0.892191	0.933202	3.97044	0.912696		190.382	179.208	217.428	244.688	143.681	116.27	184.795	180.517
PcyM_0511200	0.66114	7.74023	0.438124	2.67862	0.306008	0.370613	2.87953	0.33831		17.32	18.9363	21.7345	24.714	37.5545	81.0425	18.1281	41.2614
PcyM_0511300	0.0597451	0.110888	0.0707666	0.249781	0	0.0236735	0.122795	0.0118368		7.93054	9.49389	5.292	8.78838	5.23077	21.1283	8.71221	10.1099
PcyM_0511400	4.30849	3.14056	0.323359	0.443363	0	0.676843	2.05394	0.338422		26.4863	34.5831	40.8901	58.1634	19.7325	56.7932	30.5347	43.8948
PcyM_0511500	0.14006	0.33333	0.0794514	0.201386	0	0.306569	0.188557	0.153284		33.6598	37.2932	30.1652	35.0909	44.6881	28.6471	35.4765	34.6478
PcyM_0511600	0.0704302	0.0936934	2.01451	3.18158	0.0492326	0.198755	1.34006	0.123994		45.6274	43.0775	49.2431	41.5488	13.4797	40.4426	44.3524	36.1785
PcyM_0511700	8.70512	121.339	20.1342	22.1222	0.765846	0.206118	43.0751	0.485982		20.2806	27.829	20.6914	28.0565	53.1331	21.6189	24.0548	30.875
PcyM_0511800	6.42607	0.494301	0.260925	0.0450575	0.899857	0.345114	1.80659	0.622486		88.2201	95.2468	86.4521	92.9227	71.4793	139.13	91.7335	97.496
PcyM_0511900	83.0541	84.5327	26.6421	4.51678	3.61485	2.99975	49.6864	3.3073		219.025	218.35	181.906	185.434	405.547	198.211	218.687	242.774
PcyM_0512000	45.9537	29.6094	61.9572	23.9612	1.7237	1.11339	40.3704	1.41855		195.122	213.579	196.748	231.922	424.963	125.272	204.351	244.726
PcyM_0512100	1.74833	3.68442	1.45726	2.78919	7.69552	3.72808	2.4198	5.7118		681.467	535.747	433.803	478.825	779.145	535.281	608.607	556.763
PcyM_0512200	0	0.822777	5.41715	0.897347	0.218666	0.464302	1.78432	0.341484		37.4088	40.4369	39.1015	32.2738	24.8555	12.8223	38.9229	27.2633
PcyM_0512300	0.425543	24.8701	7.95987	11.6782	0.304246	0.327536	11.2334	0.315891		67.0482	67.9387	52.8827	55.603	77.2706	87.6028	67.4935	68.3398
PcyM_0512400	0.0632946	0.00403916	0.140641	0.0402912	0.302056	0.365826	0.0620665	0.333941		43.4844	53.9017	50.4796	68.4061	83.8289	22.3244	48.6931	56.2597
PcyM_0512500	0.016882	0.115345	0.110751	0.249677	0	0	0.123164	0		1.04446	3.82436	2.85501	1.89652	3.76264	0	2.43441	2.12854
PcyM_0512600	0.317117	0.351227	0.115008	0.177302	0.0669791	0.270399	0.240163	0.168689		38.2297	37.7368	42.6474	37.3268	1.90855	18.6668	37.9832	25.1374
PcyM_0512700	1.57355	2.35012	68.9751	10.2478	0.0832922	0.526314	20.7867	0.304803		60.4538	54.1759	64.92	60.9899	41.0856	44.1625	57.3149	52.7895
PcyM_0512800	4.00389	0.182038	10.4304	11.6229	0.648527	0.752718	6.55981	0.700623		108.96	112.594	113.191	110.491	111.48	92.4929	110.777	106.914
[truncated: 5,181 more rows]

## Sheet: Sheet1
Gene Id	PAC-27-F1-day9-GFPhigh	PAC-27-F2-day9-GFPhigh		PAC-27-F1-day10-GFPhigh	PAC-27-F2-day10-GFPhigh	PAC-30-F2-day10-GFPhigh	PAC-31-F1+F2-day10-GFPhigh
PcyM_0000100	0	0		0.0811663	0.0808754	0.240682	0.646149
PcyM_0000200	0	0		0.0432854	0	0.119186	0
PcyM_0000300	0.0217482	0.0689148		0.0207273	0.132909	0.0790231	0.229164
PcyM_0000400	0.052519	0		0	0	0.0198781	0
PcyM_0000500	10.4612	4.68475		7.59125	6.13225	9.47755	4.69911
PcyM_0000600	0	0		0	0.14973	0	0
PcyM_0000700	0	0		0	0.00431433	0.0128392	0
PcyM_0000800	0	0		0	0	0	0
PcyM_0000900	0.142702	0		0	0.464626	0	0
PcyM_0001000	0	0		0	0	0.0516703	0.064218
PcyM_0001100	4.41896	2.9049		5.12351	3.55558	4.06362	14.3109
PcyM_0001200	0.0719586	0.414161		0.412511	0.0958461	0.0831932	1.7725
PcyM_0001300	0	0		0.151841	0.252161	0	0.373061
PcyM_0001400	0.228926	0.215464		0.654537	0.46585	0	2.92912
PcyM_0001500	0.163751	0.12342		0.114659	0.173753	0.25854	0.0528205
PcyM_0001600	0.00929887	0		0	0	0	0
PcyM_0001700	0	0.153987		0.0131612	0.393421	0	0
PcyM_0001800	0.104941	0.0554983		0.0644487	0.159474	0	0
PcyM_0001900	0	0		0	0.233387	0	0
PcyM_0002000	0	0.0136546		0	0.0363649	0	0
PcyM_0002100	0	0		0	0	0	0
PcyM_0002200	0	0		0	0	0	0
PcyM_0002300	0	0.0189894		0	0	0	0
PcyM_0002400	3.03291	2.97505		4.86422	2.80386	1.32748	13.1988
PcyM_0002500	0.280231	0		0.755443	0.136861	0	1.0124
PcyM_0002600	0	0		0	0.334871	0	0
PcyM_0002700	0.265212	0		0	0.64763	0	0
PcyM_0002800	0	0		0	0.0118119	0	0
PcyM_0002900	0	0.140323		0.48886	0.162369	0	0
PcyM_0003000	1.15485	0.270796		0.327571	0.15876	0	0
PcyM_0003100	0.136516	0		0	0	0.0637759	2.21937
PcyM_0003200	0	0		0	0	5.69089	0
PcyM_0003300	0	0		0	0.0451727	0	0.0232053
PcyM_0003400	0.195541	0.0606614		0.115011	0.481595	0	0.00772664
PcyM_0003500	0.358005	0.419735		0.243714	0.194272	0.00218994	1.08416
PcyM_0003600	0.055994	0		0.0131947	0	0.0211934	0
PcyM_0003700	0.042681	0.167968		0.454563	0.418697	0.21623	1.44558
PcyM_0003800	0	0.00690282		0	0	0	0
PcyM_0003900	0	0		0	0	1.27942	0
PcyM_0004000	0.138503	0		0	0	0.00867681	0
PcyM_0004100	0.0851557	0.0854234		0.00421274	0.00419764	0.014471	0
PcyM_0004200	0.0119584	0		0.00603374	0	0	2.83517
PcyM_0004300	0	0		0	0.00812704	0.0241857	0
PcyM_0004400	0	0		0.0175351	0	0	0
PcyM_0004500	0	0.351638		0.00160136	0	0	0
PcyM_0004600	0	0		0	0	0	16.4145
PcyM_0004700	1.73368	2.80133		5.35777	3.95768	5.41514	6.78466
PcyM_0004800	0.314533	0.778669		0.226162	0.313975	0.800894	0.0334099
PcyM_0004900	0.498678	0.703034		0.799628	0.586986	0.902556	0.327494
PcyM_0005000	0.26353	0.449582		0.181165	0.474774	0	1.42112
PcyM_0005100	0	0		0.653419	0.434051	0.00615104	0.0111486
PcyM_0005200	0	0.00393639		0	0	0	0.00842336
PcyM_0005300	0.018704	0		0	0	0	0
PcyM_0005400	0	0		1.77667	0	0	3.27386
PcyM_0005500	0.109543	0.231177		0.0103254	0	0	0
PcyM_0005600	0	0.227381		0	0.263105	0	2.43283
PcyM_0005700	0.531098	0.819055		0.183555	0.847975	0.89066	1.93716
PcyM_0005800	3.45144	5.0582		5.89531	10.6132	13.9344	22.553
PcyM_0005900	0	0.0589423		0.0586699	0.0682028	0	0
PcyM_0006000	0.182933	0.123209		0.228927	0.370673	0.848544	6.45947
PcyM_0006100	0	0		0.45931	0	0	0.987429
PcyM_0006200	0.046416	0		0.00387793	0.0779245	0.0105409	0
PcyM_0006300	0.38317	0.336382		0.0243907	0.388852	0.201677	0.809704
PcyM_0006400	0.00327704	0		0.254397	0	0	0
PcyM_0006500	0.930349	1.79977		3.80004	0.189321	0	11.2037
PcyM_0006600	1.66888	0.0176097		0	0.0242576	0	0
PcyM_0006700	0	0		0	0	0.00983989	0
PcyM_0006800	0.0400899	2.21281		0.027766	0.0276665	0.0953779	0
PcyM_0006900	21.6009	20.0411		32.9965	33.324	32.069	68.1445
PcyM_0007000	5.1075	4.74236		4.72258	1.21089	16.4996	5.33705
PcyM_0007100	0.68555	0.471844		1.00206	0.915141	0.0346932	2.33916
PcyM_0007200	0.959972	1.2563		0.812552	1.20763	0	2.76857
PcyM_0007300	0.162159	0.541841		0.397405	0	0.204821	0
PcyM_0007400	0	0.0040108		0	0	0	0.00858258
PcyM_0007500	0.0681429	0		0	0.0332801	0	0
PcyM_0007600	0.40799	0		0	0.249071	0	0
PcyM_0007700	0.717473	0.757066		0	0.876009	0	0
PcyM_0007800	0.225464	0.312777		0.388873	0.140187	0	0.0486629
PcyM_0007900	0.0856907	0.00199907		0.0042392	0.00422401	0.0145619	0
PcyM_0008000	0	0		0.0363333	0	0	0
PcyM_0008100	0	0		0.259885	0.00304652	0.0090663	0
PcyM_0008200	0	0.0152078		0	0.020949	0	0
PcyM_0008300	0.152067	0.0267431		0.00456706	0.127647	0	0.1073
PcyM_0008400	0.258447	0.00545418		0	0.0075132	0	0
PcyM_0008500	0	0		0	0	0	0
PcyM_0008600	0	0		0	0.0455477	0	0
PcyM_0008700	0.154808	0.001089		0.189695	0.12751	0	0
PcyM_0008800	0.119892	0.256632		0.0710339	0.418241	0.0435633	0.0464077
PcyM_0008900	0.178508	0		0	0	0.162154	0
PcyM_0009000	0.208942	0.00247081		0.0145096	0.00522079	0.0179983	0
PcyM_0009100	0.0213775	0		0	0	0	0
PcyM_0009200	0	0.202222		0.00230231	0.0815433	0.00644773	0
PcyM_0009300	0	1.40356		0	0	0	0.0393594
PcyM_0009400	0.0168652	0		0	0	0	0
PcyM_0009500	0	0.205645		0.0140476	0	0.0202326	0
PcyM_0009600	0	0.010645		0	0.0146637	0	0
PcyM_0009700	0.162099	0		0.0993147	0.692711	0	3.29412
PcyM_0009800	0.0687625	0		0.168517	0.419783	0	0.621051
PcyM_0009900	0.329738	0		0	0	0	7.07308
PcyM_0010000	0	0.117147		0.226734	0	0	0
PcyM_0010100	0	0		0.160571	0	0	0
PcyM_0010200	0.216377	0.250899		0.452097	0.926114	0.0863973	0.76475
PcyM_0010300	0.270384	0.0798855		0.569204	0	0.0261987	0.109893
PcyM_0010400	2.46988	2.12431		9.7918	10.2916	18.678	30.0121
PcyM_0010500	0	0		0.133024	0	0	0
PcyM_0010600	0.312923	0		0.260544	0	0.00541437	0
PcyM_0010700	0.0837949	0		0.449219	0.358087	1.15446	0
PcyM_0010800	0	0.022029		0	0.00400965	0	0
PcyM_0010900	0.0408182	0		0.900304	0	0	0
PcyM_0011000	0.0305503	0		0	0	0	0
PcyM_0011100	0.00310406	0		0.351198	0	0	0
PcyM_0011200	0	0		0	0	0.193076	0.0799877
PcyM_0011300	0	0.0228677		0	0	0	0
PcyM_0011400	0	0.985361		0.0220052	0	0.0242364	0
PcyM_0011500	0	0		0.0225853	0	0.0248753	0
PcyM_0011600	0	0		0.185704	0	0	0
PcyM_0011700	0	0		0	0	0	0.0127668
PcyM_0011800	0	0		0	0	0	0
PcyM_0011900	0.612519	0		0	0	0	0
PcyM_0012000	19.878	14.5963		26.6743	37.5312	25.6118	25.0505
PcyM_0012100	40.8388	36.8593		38.3114	41.8057	67.2327	43.8927
PcyM_0012200	47.115	36.855		37.1583	39.0159	41.8535	58.3936
PcyM_0012300	79.9877	66.4433		68.8619	65.8791	74.25	94.6139
PcyM_0012400	0	0		0	0.00406185	0	0
PcyM_0012500	1.49852	0		8.16097	5.6922	11.1923	53.7614
PcyM_0012600	0	0		0.539669	0.806602	0.400069	29.3361
PcyM_0012700	11.4012	7.2564		21.111	30.3156	54.7094	9.1532
PcyM_0012800	2.23821	2.05367		3.33882	5.58436	6.18786	9.00891
PcyM_0012900	0.135124	0.00151682		0.165575	0	0	0
PcyM_0013000	0	0		0	0	0.0179393	0
PcyM_0013100	7.00581	0.616035		15.7385	13.8287	31.8199	85.0262
PcyM_0013200	0.130462	0.0917744		0.21315	0.318579	0.0790065	0.687348
PcyM_0013300	2.27129	2.6032		2.05566	2.65281	3.40638	0.891282
PcyM_0013400	7.46275	4.88767		16.8701	18.0664	34.5965	151.655
PcyM_0013500	0.405517	0		0.248451	0	0	0.68673
PcyM_0013600	0.125091	0.263988		0.153281	0.458196	0.00946924	0.141225
PcyM_0013700	0.133067	0		0.163055	0.162471	0	0
PcyM_0013800	0	0		0	0.00478273	0	0
PcyM_0013900	0.107191	0.131958		0.658422	0.436256	0.129828	0.564745
PcyM_0014000	0.273884	0.0642217		0.118648	0.495411	0.0276435	0.0229044
PcyM_0014100	7.20058	5.40637		6.77389	5.93749	10.0018	7.61857
PcyM_0014200	0.0587928	0		0.0720422	0.287136	0	0
PcyM_0014300	0.0275954	0		0	0.00832417	0.0247724	0
PcyM_0014400	0	0		0	0	0	0
PcyM_0014500	0	0		0.489678	0	0	0
PcyM_0014600	0	0		0	0	0	0
PcyM_0014700	9.94978	5.82115		6.72495	5.39258	6.80104	6.04288
PcyM_0014800	0	0		0	0.67401	0.0052235	0
PcyM_0014900	0.0389378	0.114113		0.135761	0.509009	0.273331	0.222606
PcyM_0015000	0.137317	0		0.00701095	0.788001	0	0
PcyM_0015100	0.0066243	0		0.441572	1.85216	0.866508	0.00385997
PcyM_0015200	0	0		0	1.36446	0	0
PcyM_0015300	0.609997	0		0	0	0	0
PcyM_0015400	0.0379218	0.13268		0.0440222	0.285118	0.849731	0
PcyM_0015500	0.0558012	0.176642		0	0.476919	0.107171	0
PcyM_0015600	0	0.846515		0	0	0	0.00943454
PcyM_0015700	0	0		0	0	0	0
PcyM_0015800	0	0		0	0	0	0.033112
PcyM_0015900	0.0822546	0.260381		0.201583	0.102005	0.00468824	0
PcyM_0016000	38.5985	35.7866		34.462	31.268	25.1493	59.4917
PcyM_0016100	0.813072	0.83929		3.1246	4.3522	0.107041	4.88903
PcyM_0016200	0.128568	0.0417423		0.145423	0.217352	0	0.803908
PcyM_0016300	0.336505	0		0.41234	0.205431	0	1.89954
PcyM_0016400	0.467806	0		0.540782	0.788614	1.50736	6.93561
PcyM_0016500	0	0.00352878		0.540919	0.146995	0.218725	3.53393
PcyM_0016600	0.0443987	0		0.0148375	0	0.0403311	0
PcyM_0016700	0.192129	0.107328		0.23081	0.105792	0.0615976	0.165872
PcyM_0016800	0	0.0396649		0.260727	0.00309277	0	1.04095
PcyM_0016900	0.191676	0		0.359216	0	0.00994948	0.432797
PcyM_0017000	0	0		0.285635	0.284612	0	0.701784
PcyM_0017100	0	0		0.00603717	0.222575	0.00895098	0
PcyM_0017200	0.227046	0.158543		0.285012	0.0917258	0	0
PcyM_0017300	0.133334	0		0.528765	0.17365	0.500625	3.01064
PcyM_0017400	7.62324	5.4962		7.46211	6.54812	10.4215	8.59298
PcyM_0017500	0	0		0.780107	0	0	0
PcyM_0017600	0	0		0	0	0	0
PcyM_0017700	0	0		0	0	0	0
PcyM_0017800	0	0.096534		0.0560512	0.223401	0	0.00111059
PcyM_0017900	0	0		0	0	0	0
PcyM_0018000	0	0		0.527568	0.0584085	0	0
PcyM_0018100	0.428986	0.0565824		0	0	0	0
PcyM_0018200	0.229284	0.0806456		0.88969	0.699869	0	1.55314
PcyM_0018300	0	0		0.0187223	0	0	0
PcyM_0018400	1.94594	0		0	0	0	0
PcyM_0018500	0.0729186	0.153885		0.178703	0	0	0
PcyM_0018600	0.146049	0		0.313183	0.04458	0.0216862	0.333207
PcyM_0018700	0.38591	0.0435336		0.398213	0.198393	0	2.6614
PcyM_0018800	0.0442798	0.0934466		1.95331	0.0512186	0	0
PcyM_0018900	0	0		0.213252	0	0	0
PcyM_0019000	0	0		0	0	0	0
PcyM_0019100	0.0633126	0		0.137762	0.270559	0.905817	0
PcyM_0019200	0	0		0	0	0.0408343	0.0507505
PcyM_0019300	0.00412507	0		0	0.424261	0	0
PcyM_0019400	0.0134318	0.00480053		0	0	0.00966888	0
PcyM_0019500	0	0		0	0	0	0
PcyM_0019600	0	0		0	0	1.05909	0
PcyM_0019700	0	0		0	0.00795796	0.0236825	0
PcyM_0019800	0.0397052	0.0129679		0.0274996	0.027401	0.0944628	0
PcyM_0019900	0	0		0.0328346	0.0654339	0	0
PcyM_0020000	0	0		0.0270585	0.00250756	0	0.210922
PcyM_0020100	0	0		0	0	0.0129796	0.0488557
PcyM_0020200	0	0.00977934		0	0	0	0.0209265
PcyM_0020300	0.16928	0		0.207428	0.207901	0.00361815	0
PcyM_0020400	0	0		1.157	0	0	0
PcyM_0020500	0.205132	0		0	0.187845	0	0
PcyM_0020600	0	0		0.191823	0	0	1.59062
PcyM_0020700	0.170763	0		0.941607	0.364868	0	0
PcyM_0020800	0.0439732	0.0319999		0.0805147	0.122808	0	0
PcyM_0020900	0	0.169905		0.0145218	0.434091	0	0
PcyM_0021000	0.142947	0.150835		0.140129	0.212349	0.315971	0.0645537
PcyM_0021100	0.231039	0.217454		0.66058	0.470152	0	2.95617
PcyM_0021200	0.0931375	0.0327591		0.228253	0.189529	0	0.420601
PcyM_0021300	0.0835202	0.480705		0.474495	0.111246	0.0965599	2.05729
PcyM_0021400	2.49933	1.79334		2.24829	1.56068	0.908143	5.4929
PcyM_0021500	0.0223157	0		0.00965108	0	0	0
PcyM_0021600	0.0284666	0.006675		0.395326	0.185369	0.00861954	0
PcyM_0021700	0.254266	0.288171		1.08471	1.77071	0.119763	4.08264
PcyM_0021800	0	0		0	0.584277	0	0.0684368
PcyM_0021900	0	0		0	0	0	0
PcyM_0022000	0.298774	0		0	0	0	0.0374789
PcyM_0022100	0	0		0	0	0.0830969	0
PcyM_0022200	0	0		0	0	0	0
PcyM_0022300	0	0		0	0	0	0
PcyM_0022400	0	0		0.82822	0	0	0
PcyM_0022500	0.251553	0		0.246593	0.614274	1.83066	0
PcyM_0022600	0	0.022846		0	0	0	0
PcyM_0022700	0	0		0.132505	0	0.266856	0
PcyM_0022800	0.279189	0.257771		0.598686	0.55393	0	0
PcyM_0022900	0.0608568	0.192646		0.447428	0.965953	0	0
PcyM_0023000	0	0		0	0	0.0054907	0.00341203
PcyM_0023100	0	0		0.869271	2.02443	0.0101084	0
PcyM_0023200	0.104445	0		0	0	0	0
PcyM_0023300	0.149816	0		0.357233	0.0889881	0	0.65827
PcyM_0023400	0.0608338	0.0106985		0.205881	0.19241	0	0.732588
PcyM_0023500	0	0		0.0196177	0.0059792	0.0177938	0
PcyM_0023600	0	0		0.15775	0	0	0
PcyM_0023700	0	0		0	0	0	0.030784
PcyM_0023800	0.0428295	0		0	0	0.0162107	0
PcyM_0023900	0	0.19839		0.172788	0.230403	0	0.849056
PcyM_0024000	0	0.0561806		0.18485	0	0.0483647	0
PcyM_0024100	0	0.00899712		0.522406	0.0123936	0	0
PcyM_0024200	0.202307	0		0	0.123505	0.0262532	0
PcyM_0024300	0.19406	0		0	0	0	0
PcyM_0024400	0.668749	0.00750695		1.63891	0	0	0
PcyM_0024500	0	0		0	0	0	0
PcyM_0024600	0	0		0	0	0.0562061	0
PcyM_0024700	0	0		0	0	0	0
PcyM_0024800	0	0		0	0	0	0
PcyM_0024900	0.15901	0.00167785		0	0.194146	0	0
PcyM_0025000	0	0		0.929572	0	0	0
PcyM_0025100	0.568923	0		0	0	0	1.92691
PcyM_0025200	0.0184705	0		0	0.0225518	0	0.0107627
PcyM_0025300	0.0455482	0.0173022		0	0	0	0
PcyM_0025400	0.133526	0.105671		0.122713	0.448335	0	0
PcyM_0025500	0	0		0.0247611	0.0822411	0.00917797	0
PcyM_0025600	0.0203084	0.0534771		0.0835138	0.0832144	0.00905922	0
PcyM_0025700	1.04294	0.74146		2.49297	3.34638	2.54189	1.14066
PcyM_0025800	1.18557	1.17325		0.807802	1.47999	1.12685	1.54855
PcyM_0025900	0.248236	0.67487		0.717257	0.515481	0.267316	0.871457
PcyM_0026000	0.816731	0.78918		1.2628	2.29261	0.258697	2.63493
PcyM_0026100	0	0		0	0	0	0
PcyM_0026200	0	0		0	0.0483264	0.00410907	0
PcyM_0026300	0.284054	0		0	0	0	0
PcyM_0026400	0.238532	0		0	0	0	0
PcyM_0026500	0	0		0.0279051	0	0.941245	0
PcyM_0026600	0.280705	0		0	0.916637	0.00799963	0
PcyM_0026700	0.372517	0.0294806		0.114117	0.730888	0	1.46029
PcyM_0026800	0.300375	0.528251		1.30868	0.957617	0.272856	3.12741
PcyM_0026900	0.200104	0		0.00240391	0	0	0
PcyM_0027000	0	0		0	0	0	0
PcyM_0027100	0	0		0	0	0	0
PcyM_0027200	0	0.163105		0.0473523	0.0471826	0	0
PcyM_0027300	0	0		0.917217	0	0	0.0352115
PcyM_0027400	0.232315	0		0.0813341	0.0405213	0	0
PcyM_0027500	0.53196	0		0	1.94851	0.0402687	0
PcyM_0027600	0.00382864	0		0	0.182311	1.89892	0
PcyM_0027700	0	0.00928272		0.215596	0	0	0
PcyM_0027800	0.0260186	0		0	0.00784851	0.0233568	0
PcyM_0027900	0	0		0.202429	0	0	0
PcyM_0028000	0.127557	0.188434		0.500168	0.186891	0	0.115207
PcyM_0028100	0.00988297	0		0.217983	0.223784	0	0
PcyM_0028200	0	0		0.28015	0	0.276909	0.00370058
PcyM_0028300	0.118668	0		0.266989	0.0941784	0.0107796	0
PcyM_0028400	2.89491	2.24819		2.53459	2.5757	2.88527	7.69576
PcyM_0028500	0.0830456	0		0.0339202	0.23659	0	0
PcyM_0028600	0.453031	0.00121947		0.0793036	0.395097	0	0
PcyM_0028700	0.00311953	0.00504039		0	0	0	0.0107858
PcyM_0028800	0	0		0.0256999	0.0147956	0	0
PcyM_0028900	0.190836	0.000508503		0	0	0	0
PcyM_0029000	0.475555	0		0.017139	0	0	13.9592
PcyM_0029100	0.676647	0.203996		0.594814	0.35407	0	1.09131
PcyM_0029200	0.396688	0.104645		0.121521	1.45303	0	0
PcyM_0029300	0.0736384	0		0.00657571	0.255533	0.380228	0
PcyM_0029400	0.00895044	0		0.520956	0.00244277	0.00726958	3.07188
PcyM_0029500	0.163629	0		0.200504	0	0	0
PcyM_0029600	0.998247	1.83484		1.34158	2.04448	3.62717	9.88852
PcyM_0029700	0.163822	0		0	0	0	0
PcyM_0029800	1.15009	0.334167		1.4357	1.29362	0.442871	2.63919
PcyM_0029900	0.774782	0.534993		0.215982	0.853833	0.273073	2.22615
PcyM_0030000	0.415774	0.194986		0	0.169215	1.25894	0
PcyM_0030100	0.206483	0.192301		0.404197	0.739154	0.0543671	4.21046
PcyM_0030200	0.381575	0.18583		0.0498327	1.60355	0.176817	1.18249
PcyM_0030300	2.23337	0.589155		4.37869	5.59008	3.65757	1.00857
PcyM_0030400	4.59434	3.00335		2.50725	2.42887	1.44564	0
PcyM_0030500	2.0812	2.56206		5.10044	3.17635	3.78107	2.34964
PcyM_0030600	0.156607	0		0.19284	0.0956057	0	0
PcyM_0030700	0	0		0.0744871	0	0	0
PcyM_0030800	0	0		0.1997	0.450531	0	0.00223972
PcyM_0030900	0	0		0	0	0	0
PcyM_0031000	0.130416	0.131791		0.512201	0.779467	0.218711	3.80552
PcyM_0031100	0	0		0	1.53821	0	0
PcyM_0031200	3.20366	0		0	0	0	0
PcyM_0031300	2.83658	0		0	0	0	64.0488
PcyM_0031400	0.340408	0.578792		0.521401	1.03906	0	9.60783
PcyM_0031500	2.98763	3.28386		4.28091	3.04948	0.90464	12.3676
PcyM_0031600	0	0.0133802		0.352198	0.169838	0.130546	0.019088
PcyM_0031700	0.00827094	0		0.138992	0.129838	0.772786	0
PcyM_0031800	0	0		0.428594	0	0.00599317	0
PcyM_0031900	0	0		0	0	0	0
PcyM_0032000	0.112048	0		0	0	0	0
PcyM_0032100	0.0552515	0.00108272		0	0	0	0.810911
PcyM_0032200	0.245701	0		0	0	0	0.0231159
PcyM_0032300	0	0.00442835		0	0.0061001	0	0
PcyM_0032400	0	0		0	0	0	0
PcyM_0032500	0.0268004	0		0.702903	0	0	6.98938
PcyM_0032600	0	0.00934709		0.0108545	0.304415	0	0
PcyM_0032700	0	0.00501477		0	0	0	0.010731
PcyM_0032800	0	0		0	0	0	0
PcyM_0032900	0	0.0245368		0	0	0	0
PcyM_0033000	0	0		0	0	0	0
PcyM_0033100	0.0964398	0		0.297955	0.181486	0.540093	0
PcyM_0033200	0	0.751033		1.21871	0	3.07175	1.79657
PcyM_0033300	1.12291	2.06291		1.36891	0.0106563	2.02961	0.00650125
PcyM_0033400	36.8333	34.326		41.7907	41.0003	90.7487	73.4533
PcyM_0033500	41.2449	29.4684		44.0122	40.4082	52.7597	51.1201
PcyM_0033600	31.4171	23.8313		26.5925	30.1174	32.3211	36.8463
PcyM_0033700	0.131278	0.21471		0.488775	0	0	0
PcyM_0033800	0.0318254	0.359254		0.118211	0.00180734	0.231278	0
PcyM_0033900	0.130894	0		0.160392	0.479452	0	0
PcyM_0034000	0	0		0	0	0.241604	0
PcyM_0034100	0	0		0.0208478	0	0.0229616	0
PcyM_0034200	0	0		0.0121575	0	0	0
PcyM_0034300	0.182192	0.0516483		0.179934	0.0193518	0	0.116661
PcyM_0034400	0.0902827	0		0.3168	0	0	0
PcyM_0034500	0	0		0	0	0	0
PcyM_0034600	0	0		0	0.983082	0	0
PcyM_0034700	0	0		0	5.04896	0.044063	0.0969767
PcyM_0034800	0.120453	0.222424		0	0	0	0.135988
PcyM_0034900	0	0		0	0	0.0120067	0
PcyM_0035000	0	0		0	0	0.0463887	0
PcyM_0035100	0.304057	0		0	0	0	0.00738224
PcyM_0035200	0	0.00628421		0	0	0	0
PcyM_0035300	0	0.00506079		0	0	0.0101931	0
PcyM_0035400	0.215064	0.25082		0.37449	0.373148	0.320803	0.00102233
PcyM_0035500	41.1536	41.7434		50.5707	48.3492	45.4671	98.1
PcyM_0035600	0.00450948	0.008565		0	0.198213	0	0
PcyM_0035700	0	0.124186		0.0288428	0	0	0.00857233
PcyM_0035800	0.0724072	0		0.0443624	0.13261	0.460415	0
PcyM_0035900	0.0242233	0		0	0	0.0330061	0
PcyM_0036000	0.067342	0.0449374		0.0279383	0.124924	0	0.433358
PcyM_0036100	0	0		0.0614962	0.159317	0.0179591	0
PcyM_0036200	0.0279541	0		0	0	0	0
PcyM_0036300	0	0.0156306		0	0.0215313	0	0
PcyM_0036400	0	0		0.219971	0	0.019766	0.012283
PcyM_0036500	0	0		0	0.0092209	0	0
PcyM_0036600	0	0		1.51872	0	0	0
PcyM_0036700	0	0		1.33998	0	0	0
PcyM_0036800	0	0		0.945893	0.471251	0.0100173	0
PcyM_0036900	0	0		0	0	0	0
PcyM_0037000	0	0		0	0.00804375	0	0
PcyM_0037100	0.0325192	0.617648		0.0137934	0	0	3.30422
PcyM_0037200	0	0.0657903		0	0.00179122	0.00533058	0
PcyM_0037300	0	0		0	0.0639103	0	0
PcyM_0037400	0.275125	0.0902093		0.0171793	0.324422	0.0344717	0
PcyM_0037500	0.11544	0.239109		0.586777	1.02318	0.10098	0.810937
PcyM_0037600	0.261504	0		0.234987	0.0851434	0.0475093	0
PcyM_0037700	0	0		0	0.502439	0	0
PcyM_0037800	0.171354	0.181859		0.0763525	0.0570591	0	0
PcyM_0037900	0.171475	0.28146		0.204282	0.20355	0.424029	0
PcyM_0038000	0	0		0	0.269113	0	0
PcyM_0038100	0	0.0189894		0	0	0	0
PcyM_0038200	0	0		0.00939252	0	0	0
PcyM_0038300	0.44404	0.937088		0.544108	1.09722	0	0.919071
PcyM_0038400	0	0		0	0.00705506	0.0209956	0
PcyM_0038500	0.279568	0		0.11419	0.227562	0	0
PcyM_0038600	0	0		0	0	0	0
PcyM_0038700	0.0493911	0		0	0	0	0
PcyM_0038800	0	0		0	0	0.863972	0
PcyM_0038900	0.218599	0.576657		0.100448	0.220089	0.148929	0
PcyM_0039000	0.0357628	0.0135851		0	0.0187136	0	0
PcyM_0039100	0	0		0	0	0	0
PcyM_0039200	0	0		0.00751811	0	0	0
PcyM_0039300	0.0247011	0		0	0.00674147	0.0200623	0
PcyM_0039400	0	0		0	0	0	0
PcyM_0039500	0.0219724	0.142115		0.500274	0.38778	0.0729943	0.0793804
PcyM_0039600	0	0		0	0	0.0305056	0
PcyM_0039700	0.122461	0		0	0	0	0
PcyM_0039800	0	0		0	0	0	0
PcyM_0039900	0	0		0	0	0	0
PcyM_0040000	0	0		0	0	0	0
PcyM_0040100	0	0.197444		0	0.15231	0	0.00151436
PcyM_0040200	0	0		0.00635611	0.234333	0.00942386	0
PcyM_0040300	0	0.199427		0.173692	0.288449	0.343365	1.28025
PcyM_0040400	0	0		0.485768	1.1528	0.571778	0
PcyM_0040500	0	0		0	0	0.00970786	0
PcyM_0040600	0	0		0	0	0	0
PcyM_0040700	0	0		0	0	0	0
PcyM_0040800	0	0		0.153145	0	0	0
PcyM_0040900	0	0		0	0	0.831438	0
PcyM_0041000	0.77134	0.432388		0.420327	0.264875	0.788258	2.14078
PcyM_0041100	0.193891	0		0	0.246204	0	0
PcyM_0041200	0.974977	0.576858		0.949165	0.96054	0	4.55474
PcyM_0041300	0.284237	0.0333247		0.587316	1.38817	0.229508	0
PcyM_0041400	0.378908	0		0	0	0	0
PcyM_0041500	0	0.0981111		0.0835515	0.0454102	0	0
PcyM_0041600	0.053748	0.226856		0.131721	0.39543	0	0
PcyM_0041700	0	0		0	0	0	0
PcyM_0041800	0	0		0.179645	0	0	0
PcyM_0041900	0	0		0.434812	0	0	0
PcyM_0042000	0	0.0972655		0.338856	0	0.837337	1.35288
PcyM_0042100	0.095814	0.0773129		0.186469	0.13763	0	0.381784
PcyM_0042200	0	0.133296		0	0	0	0
PcyM_0042300	0.131828	0.255022		0.376919	0.0268263	0	1.38909
PcyM_0042400	0	0.0394947		0.259608	0.0030795	0	1.03649
PcyM_0042500	0	0.0200043		0.74035	0	0	0
PcyM_0042600	0	0.0142494		0	0	0	0
PcyM_0042700	0.143544	0		0	0.0876312	0	0
PcyM_0042800	0	0		0.0657093	0	0	0
PcyM_0042900	0.0470243	0		0.139196	0.137796	0	0.0035393
PcyM_0043000	0.0714103	0.226053		0.175006	0.0885571	0.00407015	0
PcyM_0043100	1.68462	0.882664		0.768761	0.638338	1.7097	1.18049
PcyM_0043200	0.147659	0		0.585377	0.807532	0.13972	2.29217
PcyM_0043300	0.13877	0.181292		0.161946	0.0322731	0	0.089525
PcyM_0043400	0.228993	0.370874		1.57918	2.34843	1.08361	0.793622
PcyM_0043500	0.0298144	0		0.265697	0.0546036	0.108332	1.31273
PcyM_0043600	0.142143	0.095446		0.248068	0.12096	0.0469528	0.189653
PcyM_0043700	0	0.0415823		0.273331	0.00324227	0	1.11226
PcyM_0043800	0.050746	0.0160639		1.06331	0.446105	0.110633	0
PcyM_0043900	0.966076	0.360683		0.930703	0.951771	0	4.51316
PcyM_0044000	0	0.0353355		0.0351721	0.0408871	0	0.00540096
PcyM_0044100	0.00359758	0.170825		0.277724	0.204252	0	0
PcyM_0044200	0	0		0.483105	0	0	0.900105
PcyM_0044300	0	0		0.0109408	0	0.029739	0
PcyM_0044400	2.87121	2.07644		3.85669	0.772788	0.418142	11.0433
PcyM_0044500	0.156004	0		0.4779	0	0.708556	0
PcyM_0044600	0	0.0665908		0.15466	0.308212	0	0.00593732
PcyM_0044700	0.00846472	0		0	0.186032	0.00522287	0
PcyM_0044800	0	0		0	0.220445	0	0
PcyM_0044900	1.44679	0.0291448		0	0	0	0
PcyM_0045000	0	0		1.64652	0	0	0
PcyM_0045100	0.0330184	0.010784		0.0228683	0.0227864	0.0785543	3.87682
PcyM_0045200	0	0.0726498		0	0.588942	0.00147159	1.24477
PcyM_0045300	1.4969	0.402773		4.58558	3.67635	0	0
PcyM_0045400	0.240144	0		0.588524	0.293207	1.527	1.6267
PcyM_0045500	0	0.0216991		0.571168	0.27543	0.21171	0.0309555
PcyM_0045600	0	0		0	0.498451	0	0.00991178
PcyM_0045700	0.0438615	0		0.0454774	0	0	0
PcyM_0045800	0.791653	0.443775		0.424401	0.271851	0.809017	2.19716
PcyM_0045900	0	0		0	0	1.0739	0
PcyM_0046000	0.0677203	0.571659		0	0.00440982	0	1.83491
PcyM_0046100	0.103552	1.20194		0.634443	0.505735	0.564392	3.03962
PcyM_0046200	0	0		0.00803823	0	0	0
PcyM_0046300	0	0		0	0.53786	0	0
PcyM_0046400	0.118858	0.250834		0.485479	0	0	0.00263114
PcyM_0046500	0	0		0.886306	0	0	0
PcyM_0046600	33.7665	36.1593		33.3861	41.8403	34.7009	47.5673
PcyM_0046700	0	0		0	0.0116418	0.0346454	0
PcyM_0046800	0	0		0	0.172734	0.0107093	0
PcyM_0046900	0	0		0.678046	0.257325	0	0.413118
PcyM_0047000	0	0		0.0718604	0.0716028	0.213087	0.572066
PcyM_0047100	0	0		0	0	0	0
PcyM_0047200	0	0		0	2.05452	0	0
PcyM_0047300	0.317514	0		0	0	0	0.358466
PcyM_0047400	0	0		0	0	0	0
PcyM_0047500	0	0		0	0	0	0.00766687
PcyM_0047600	0.16035	0		0.196486	0	0	0
PcyM_0047700	0.0247433	0		2.22004	0	0	0
PcyM_0047800	0	0		0	0	0	0
PcyM_0047900	0	0		0	0	0	0
PcyM_0048000	0	0		0.103367	0.377654	0	0
PcyM_0048100	0	0		0	0	0	0
PcyM_0048200	0.00117055	0.0197656		0.017499	0.189501	0	0.230323
PcyM_0048300	0.152053	0		0	0	0.828738	0
PcyM_0048400	0	0		0	0.00927074	0.0275893	0
PcyM_0048500	0	0		0.0827708	0	0	0
PcyM_0048600	0	0		0.299	0	0	0
PcyM_0048700	0.0176233	0		0.00762172	0	0	0
PcyM_0048800	0.0501778	0.0137662		0	0	0	0
PcyM_0048900	0	0.0321646		0.0343637	0	0	0
PcyM_0049000	0.0215033	0.0680699		0.237143	0.131274	0	0
PcyM_0049100	0	0		0.607493	0	0	0
PcyM_0049200	0	0		0	0.00748974	0.0222892	0
PcyM_0049300	0	0		0.118631	0	0	0
PcyM_0049400	0	0.00533766		0	0	0	0
PcyM_0049500	0.3879	0		0	0	0.0213553	0.0132706
PcyM_0049600	0	0.0784555		0	0.0929178	0.00635677	0
PcyM_0049700	0	0		0	0	0	0.386121
PcyM_0049800	0	0		0	0	0	0
PcyM_0049900	0	0		1.10292	0	0	0
PcyM_0050000	0.0990062	0.417879		0.426397	0.725299	0.0899357	0.00120189
PcyM_0050100	0	0		0	0	0	0
PcyM_0050200	0.132354	0		1.45963	0.161599	0.00687018	0
PcyM_0050300	0.00187272	0		0.103264	0	0	0.0079285
PcyM_0050400	0.08807	0		0	0	0	0
PcyM_0050500	1.47542	0.0169222		0.0695353	0	0	0
PcyM_0050600	0	0		0	0	0	0
PcyM_0050700	0.16406	1.8177		0.175904	0	0	0.972409
PcyM_0050800	0.0771853	0.01253		0.126106	0.062827	0.430032	1.87415
PcyM_0050900	10.0673	2.21481		12.2885	14.1902	65.5334	34.2364
PcyM_0051000	0.0796762	0.252219		0.408051	0.162136	0.616129	6.73887
PcyM_0051100	0.052453	0		0.796102	0	0	3.31623
PcyM_0051200	0.0801299	0.0507311		0.0785502	0.0596223	0.00274028	0
PcyM_0051300	0.86962	0.714769		1.44799	0.637065	0.33261	0.0413382
PcyM_0051400	0.00702279	2.00079		0.542142	0.398718	0	0
PcyM_0051500	0	0		0	0	0	0
PcyM_0051600	0	0		0	0	0	0
PcyM_0051700	0	0		0.565601	0	0	0
PcyM_0051800	0	0		0.328568	0.0818476	0	0
PcyM_0051900	0	0		0	0.258603	0	0
PcyM_0052000	0.119677	0.378844		0	1.02285	0.22985	0
PcyM_0052100	0	0		0	0	0	0
PcyM_0052200	0	0		0	0.0030262	0	0
PcyM_0052300	1.05219	0.88427		1.37732	1.41912	2.90523	1.60839
PcyM_0052400	0	0.0125441		0	0.181716	0.0128757	0
PcyM_0052500	0	0		0	0	0	0
PcyM_0052600	0.180862	0		0.225883	0.110413	0.492877	0
PcyM_0052700	0.227969	0.0687285		0	0.178935	0	0.0700334
PcyM_0052800	0.278665	0.00588086		0	0.00810096	0	0
PcyM_0052900	0	0		0	0	0	0
PcyM_0053000	0	0.056214		0.0652798	0.00948585	0	0
PcyM_0053100	0	0.057762		0.0670775	0.00974707	0	0
PcyM_0053200	0	0		0	0.351547	0.00493486	0
PcyM_0053300	0	0		0	0	0	0
PcyM_0053400	0.123018	0		0	0	0	0
PcyM_0053500	0.0858302	0		0.192054	0.478415	0	0
PcyM_0053600	0.0875253	0.0593828		0.173194	0.0479357	0.174679	0.285588
PcyM_0053700	0	0		0.512258	0	0	0
PcyM_0053800	0.0270341	0.0054535		0.0115646	0.0115232	0.0397252	0
PcyM_0053900	0.738809	0		0	0.902061	0	0
PcyM_0054000	0	0		0.439756	0	0	0
PcyM_0054100	0	0.0155135		0.0692899	0	0	0
PcyM_0054200	0.053857	0		0.198797	0	0	0
PcyM_0054300	0	0		0	0	0	0
PcyM_0054400	0	0		0.171249	0	0.24571	0.00164182
PcyM_0054500	0	0.0461593		0	0	0	0
PcyM_0054600	0	0		0	0	0	0
PcyM_0054700	7.76819	5.10371		5.02881	6.9793	4.52682	23.8283
PcyM_0054800	51.6747	35.8927		34.3924	40.8973	25.4958	102.755
PcyM_0054900	14.9652	13.9072		16.9221	14.9167	7.2502	24.3056
PcyM_0055000	0.101971	0.215196		0.124951	0.374973	0.745389	0
PcyM_0055100	0	0		0.38885	0.0276755	0	0
PcyM_0055200	0.0774964	0.327092		0	0.283861	0	0
PcyM_0055300	0	0		0.881728	0	0	0
PcyM_0055400	0.0815536	0		0.199865	0	0	0.368289
PcyM_0055500	0	0		0.0995905	0	0	0
PcyM_0055600	0	0.000933001		0.101846	0	0	0
PcyM_0055700	0	0		0	0	0	0.00846825
PcyM_0055800	18.0985	21.6276		25.4248	19.6012	18.7104	29.7515
PcyM_0055900	10.9111	13.6947		15.9737	11.3588	8.13786	7.00205
PcyM_0056000	0.283199	0		0.954304	0.345776	0	0.319725
PcyM_0056100	0.255497	0		0.782688	0	0.00580224	0
PcyM_0056200	0	0		0.0256688	0	0	0
PcyM_0056300	0	0		0.0250059	0	0	0.0163193
PcyM_0056400	0	0		0	0.196627	0	0.0117299
PcyM_0056500	0	0		0	0.00744089	0.0221438	0
PcyM_0056600	0.340989	0.179903		0.208917	0	0.309749	0
PcyM_0056700	0	0		0	0	0	0
PcyM_0056800	0	0		0	0	0	0
PcyM_0056900	0	0		0	0	0	0
PcyM_0057000	0	0		0	0	0	0.0236252
PcyM_0057100	0.418377	0		0.512661	0	0	0
PcyM_0057200	0.648758	0		1.58992	0	0	0
PcyM_0057300	0.0199325	0		0	0.00544	0.0161892	0
PcyM_0057400	0	0.276572		0.160588	0.106675	0.00198412	0
PcyM_0057500	0.23524	0		0.0053951	0.822492	0	2.02807
PcyM_0057600	0	0		0.0462601	0.32266	0	0
PcyM_0057700	0.0171196	0		0.189539	0.501658	0	0
PcyM_0057800	0.291726	0.153912		0.714936	0	0	0
PcyM_0057900	0.344145	0		0	0	0.00504219	0
PcyM_0058000	0	0		0.152939	0	0	0
PcyM_0058100	0	0		0	0	0.0352692	0
PcyM_0058200	0.166059	0		0.135654	0.067584	0	0
PcyM_0058300	0	0		0.108274	0	0	0
PcyM_0058400	0	0		0.447191	0	0	5.76825
PcyM_0058500	0.0395116	0		0	0	0	0
PcyM_0058600	0	0.125324		0.546282	0.320191	0	0
PcyM_0058700	0.233402	0.0568343		0.124667	0.289847	0	1.74995
PcyM_0058800	0.0246617	0		0	3.79399	0	0
PcyM_0058900	0	0		2.98562	0	0	0.0143271
PcyM_0059000	0	0		0	0.334785	0.0124538	0
PcyM_0059100	0.398957	0.00200463		0.209513	0	0	0
PcyM_0059200	0.00953446	0		0.105148	0.209543	0.00890842	0
PcyM_0059300	0.30224	0.166679		0.405429	0.516497	0.000728379	0.367535
PcyM_0059400	0.230122	0.193424		0.226588	0.421874	0	0.463463
PcyM_0059500	0.520042	0.0634789		0.87231	1.39069	1.18363	1.82927
PcyM_0059600	1.10678	0.96855		3.16299	3.50237	4.6619	6.11051
PcyM_0059700	0.0206969	0.0545		0.0851112	0.0848061	0.0092325	0
PcyM_0059800	0.0111099	0		0.0285886	0.0949537	0.0105967	0
PcyM_0059900	0	0		0.571704	0	0	0
PcyM_0060000	0	0		0.00939252	0	0	0
PcyM_0060100	0	0.00566364		0	0	0	0.0121195
PcyM_0060200	0.0540068	0.0832742		0.0499118	0.0379657	0.146681	0.474779
PcyM_0060300	0.0678835	0.14543		0.0788604	0.0943138	0.161769	0.386181
PcyM_0060400	0.0884595	0.0421141		0.0341807	0.0425529	0.140161	0.499845
PcyM_0060500	0	0		0	0.0306603	0	0
PcyM_0060600	0.13711	0.0348889		0.00839647	0.0714051	0.0208725	0.245861
PcyM_0060700	0	0.0427844		0.00368033	0	0	0
PcyM_0060800	0.0191522	0.0504324		0.0787589	0.0784766	0.00854343	0
PcyM_0060900	0.0127071	0		0.0280274	0.0930898	0.0103887	0
PcyM_0061000	0	0		0.189247	0.188568	0	0
PcyM_0061100	0.0251629	0.018586		0.0190442	0	0	0
PcyM_0061200	0.0147694	0.0524205		0.173258	0.0606563	0.0584005	0.0725826
PcyM_0061300	0	0		0	0.235607	0.0100165	0.0181547
PcyM_0061400	0	0		0.0332053	0	0	0
PcyM_0061500	0.133768	0.002823		0	0	0	0
PcyM_0061600	0	0.0115498		0	0	0	0
PcyM_0061700	0	0		0	0	0	0
PcyM_0061800	0	0		0	0	0	0
PcyM_0061900	0.270878	0.357283		0	0.578782	1.47637	0
PcyM_0062000	0.0611839	0.193681		0.299889	0	0.555785	0.00148549
PcyM_0062100	0	0		0.00476135	0.161306	0.00727331	0.00451979
PcyM_0062200	0.172096	0.00208176		0.309018	0.307911	0.0151643	0
PcyM_0062300	0	0		0	0	0	0
PcyM_0062400	0.141846	0		0	0.692758	0.00780916	0.00485278
PcyM_0062500	0.373196	0		0.228649	0.45566	0	3.37065
PcyM_0062600	0	0		0	0	0	0
PcyM_0062700	0.690588	0.388639		0.112829	0.0562123	0	1.24746
PcyM_0062800	0	0.0632672		0.589205	0	0	0
PcyM_0062900	24.0026	11.1757		13.6348	13.2587	28.0977	31.694
PcyM_0063000	0.133573	0.246652		0.443905	0.557216	0.111224	1.08074
PcyM_0063100	0.251073	0.778778		0.194719	0.432023	0.364913	0
PcyM_0063200	0.480365	0.0586072		0.0337229	1.78396	0.036363	0
PcyM_0063300	11.6528	8.89489		10.3294	11.0996	16.516	31.7232
PcyM_0063400	10.5558	6.6057		10.8537	11.7092	12.7043	16.2406
PcyM_0063500	14.0074	11.7305		17.2374	15.4737	12.7241	28.1139
PcyM_0063600	0.0930835	0		0	0.113652	0.0552864	0
PcyM_0063700	0.12079	0		0.444033	0.294961	1.09724	0
PcyM_0063800	0.363806	0		0	0.59226	0	0
PcyM_0063900	0.0206252	0		0	0.00562907	0.0167519	0
PcyM_0064000	0	0		0	0.493781	0	0
PcyM_0064100	0	0		0.034659	0	0	0
PcyM_0064200	0	0		0	0	0.886621	0.0459138
PcyM_0064300	0.288986	0		0	0.0811766	0.00823562	0
PcyM_0064400	0.207023	0		0	0	0	0
PcyM_0064500	0	0		0	0	0	0
PcyM_0064600	1.00953	0.39894		0.617704	1.8483	0	1.99527
PcyM_0064700	0.0105298	0		0.0903197	0.179992	0	0
PcyM_0064800	0	0		0.235925	0.23508	0	0
PcyM_0064900	0	0		0	0	0	3.31981
PcyM_0065000	0.166711	0.0879555		0	0.306466	0.454314	0
PcyM_0065100	0	0		0.231343	0	0.0207879	0.012918
PcyM_0065200	0	0.00638013		0	0	0	0.0136526
PcyM_0065300	0.0206957	0		0	0.00564832	0.0168091	0
PcyM_0065400	0	0		0	0.0256661	0.0466774	0
PcyM_0065500	0	0		0	0	0	0
PcyM_0065600	0	0		0.00851886	0.0066908	0.0199115	0
PcyM_0065700	0	0		0	0	0	0
PcyM_0065800	0	0		0	0	0.0180264	0.011202
PcyM_0065900	0	0		0	0	0	0
PcyM_0066000	0	0.0228696		0.254472	0.00660959	0.162276	3.76476
PcyM_0066100	0	2.50175		0	1.4474	6.50596	0
PcyM_0066200	0.052306	0.166427		0.128187	0.258816	0	0
PcyM_0066300	0.112208	0.2368		0	0.068501	0.512552	0
PcyM_0066400	0.101988	0		0.00245043	0.498096	0.555867	0
PcyM_0066500	0.213435	0.000643466		0.18681	0.168481	0	0
PcyM_0066600	0.0818144	0		0.150378	0	0	0
PcyM_0066700	0	0		0.383333	0.19098	0.568347	0.0185136
PcyM_0066800	0	0.0532297		0.0529836	0.0615927	0	0
PcyM_0066900	3.23983	3.66998		4.68645	9.83112	10.993	21.5452
PcyM_0067000	0.257389	0.318826		0.106476	0.49189	0.457451	0.227416
PcyM_0067100	0	0		0	0.230212	1.37734	0
PcyM_0067200	0	0		0.00457523	0	1.43017	0
PcyM_0067300	0	0		0.0233756	0.00931674	0.0277262	0
PcyM_0067400	0.580315	0		0.711093	0	0	0
PcyM_0067500	0	0		0	0	0	0
PcyM_0067600	0	0.156583		0	0.449448	0	0.00259742
PcyM_0067700	0	0		0.840313	0.55347	0	0
PcyM_0067800	0.157661	0.166361		0	0.769994	0	0
PcyM_0067900	0.235583	0.0128238		0.200866	0.140395	0.147196	0.704525
PcyM_0068000	0.598353	1.23102		0.77689	0.301572	3.92588	3.83323
PcyM_0068100	0.967981	0.340466		1.35557	1.85723	0.837428	7.07846
PcyM_0068200	0.476995	0		0.43441	0.167425	0.818446	0.339066
PcyM_0068300	0.00548217	0.0017905		0.0911259	0.351847	0.0130426	0
PcyM_0068400	0	0		0	0.509621	0	0
PcyM_0068500	0	0		0	0	0	0
PcyM_0068600	0	0.634593		0	1.22382	0.00827738	0
PcyM_0068700	0	0		0	0.147287	0	0
PcyM_0068800	0.0957444	0.151542		0.117321	0.175351	0.60881	0
PcyM_0068900	0	0		0.0085952	0	0	0
PcyM_0069000	0	0		0.0392722	1.01742	0.0182397	0
PcyM_0069100	0.17445	0.214005		0.248924	0.17668	0.262896	0.0985319
PcyM_0069200	0.0441592	0		0	0.0155904	0.481362	0.0385972
PcyM_0069300	0	0.0621483		0.217737	0.0719125	0.642025	0.398968
PcyM_0069400	0	0.01223		0	0.0168469	0	0
PcyM_0069500	0	0		0.146784	0	0	0
PcyM_0069600	0.0447067	0.0641564		0.115824	0.0525232	0	0.06922
PcyM_0069700	0	0		0	0	0	0
PcyM_0069800	0.0567593	0.0793369		0.0139101	0.144526	0	0.512641
PcyM_0069900	0	0		0	0	0	0
PcyM_0070000	0	0		0.434011	0	0	0
PcyM_0070100	0.00901602	0.126621		0.00624444	0.435544	0.02145	0
PcyM_0070200	0	0		0	0	0	0
PcyM_0070300	0	0		0	0.308941	0	0
PcyM_0070400	0	0		0	0	0.0415314	0
PcyM_0070500	0.144255	0.153099		0.160694	0.0480354	0	0
PcyM_0070600	0	0		0	0.00912535	0.0271566	0
PcyM_0070700	0	0		0	0.532101	0	0.0410011
PcyM_0070800	0	0		0	0	0	0
PcyM_0070900	0.0143519	0.00468739		0.247354	0.0099044	0.0341446	2.94894
PcyM_0071000	0	0		0.0350146	0	0	0
PcyM_0071100	0.0680512	0		0	0	0	0
PcyM_0071200	0	0		0	0	0.00856429	0.0177401
PcyM_0071300	0	0		0.0246708	0	0	0
PcyM_0071400	0	0		0.297786	0	0.0142423	0
PcyM_0071500	0.0214279	0.00547025		0	0	0	0
PcyM_0071600	0.174138	0		0.640144	0	0.0090391	0
PcyM_0071700	0	0		0.389223	0	0	0
PcyM_0071800	0	0		0	0	0	0
PcyM_0071900	0	0		0.021505	0	0	0
PcyM_0072000	0	0.000589558		0.128712	0	0	0
PcyM_0072100	0	0		0	0	0	0
PcyM_0072200	0.228214	0.176331		0.186383	0.333875	0.000520753	0.102907
PcyM_0072300	0.322097	0		0	0	0.00705031	0
PcyM_0072400	0.119026	0.094196		0.182312	0.18259	0	0.201567
PcyM_0072500	0.463424	0		0.578781	0	0	3.13918
PcyM_0072600	0.269539	0		0.224422	0	0.00307981	1.62295
PcyM_0072700	0.197434	0		0	0.00270854	0	0
PcyM_0072800	0.332455	0		0.141015	0.541221	0	0
PcyM_0072900	0.220079	0.00247046		0.829769	0.268708	0	0
PcyM_0073000	0	0		0	0	0.0771923	15.5419
PcyM_0073100	0	0		0	0	0	0
PcyM_0073200	0.377366	0		0	0	0	0
PcyM_0073300	0.492906	0.129504		0	0.152435	0	0
PcyM_0073400	0	0.00638049		0.74095	0	0	0
PcyM_0073500	0	0		0.663554	0	0	0
PcyM_0073600	0.16889	0		0.00795963	0.00429601	0	0
PcyM_0073700	0	0.00835674		0	0	0	0
PcyM_0073800	0.168309	0		0	0.10275	0	0
PcyM_0073900	0	0		1.09546	0	0	0
PcyM_0074000	0	0		0	0	0.8002	0
PcyM_0074100	0.0515905	0.0168497		0.0599023	0.0356031	0.122739	0
PcyM_0074200	0	0		0	0.00729329	0.0217045	1.19422
PcyM_0074300	0	0		0.0219826	0	0	0
PcyM_0074400	0	0		0	0	0.111162	0
PcyM_0074500	0	0		0	0	0	0
PcyM_0074600	0.0796143	0.00168016		0	0	0	0
PcyM_0074700	0.0420148	0		0	0	0	0
PcyM_0074800	0	0		0	0.249912	0.00701629	0
PcyM_0074900	0.138115	0		0	0	0.00865252	0
PcyM_0075000	0	0		0	0	0	0.0076601
PcyM_0075100	0.0406175	0.0132659		0.0281314	0.0280306	0.0966332	0
PcyM_0075200	0	0.0144237		0.0246322	0.0198689	0	0
PcyM_0075300	0	0		0.0244861	0	0	0.00727748
PcyM_0075400	0	0.0501821		0	0	0	0
PcyM_0075500	0	0		0	0	0	0
PcyM_0075600	0	0		0	0	0	0
PcyM_0075700	0	0		0	0.275205	0	0
PcyM_0075800	0	0		0	0	0	0
PcyM_0075900	0	0		0	0	0.0178596	0.0110984
PcyM_0076000	0.211906	0.1118		0	0	0	0.00257245
PcyM_0076100	0	0		0	0.050419	0.304377	0
PcyM_0076200	0.109284	0.0487698		0.171544	0.119911	0.286435	0.633053
PcyM_0076300	0.418355	0.223058		0.764558	1.2797	0.19672	1.67771
PcyM_0076400	0.65688	0.314051		0.36604	0.83794	0.234153	0.52438
PcyM_0076500	2.58942	2.53327		4.34769	5.26809	6.6644	3.56874
PcyM_0076600	0	0.00823489		0.239442	0.357875	1.07347	0
PcyM_0076700	0.0471436	0.0179083		0	0	0	0
PcyM_0076800	0	0		0.0455818	0	0	0.0454964
PcyM_0076900	0	0		0	0.791342	0	0
PcyM_0077000	0	0		0.750827	0.561102	0	0
PcyM_0077100	0	0		0	0.325651	0	0
PcyM_0077200	0	0		0	0	0	0
PcyM_0077300	0.043949	0.0463743		0.0538533	0	0	0
PcyM_0077400	0.765584	0		0	10.2823	0	0
PcyM_0077500	0	0		0	0	0	0
PcyM_0077600	0	0		0.0605395	0	0	0
PcyM_0077700	0	0		0	0.330382	0	0
PcyM_0077800	0	0		0	0	0	0
PcyM_0077900	0	0		0.0431514	0	0	0
PcyM_0078000	0	0		0	0	0	0
PcyM_0078100	0	0.00464647		0	0	0	0
PcyM_0078200	0	0.0173651		0	0	0	0
PcyM_0078300	0.00975796	0.00197166		0	0	0	0
PcyM_0078400	0.0285797	0		0	3.76865	0	0
PcyM_0078500	0	0		0.977991	0.974485	0	0
PcyM_0078600	0	0		0	0	0.0128914	0
PcyM_0078700	8.27524	9.60509		25.9689	20.8845	27.9636	29.8962
PcyM_0078800	0.315944	0.614543		0.447782	0.65997	0.435685	1.34083
PcyM_0078900	0	0.00298454		0.0816833	0.0794293	0	0
PcyM_0079000	0.560108	0.31824		0.686332	0.420844	0	0.389138
PcyM_0079100	0.277815	0.293146		0.170212	0.0848007	0	0
PcyM_0079200	0	0.00208216		0	0.725876	0	0
PcyM_0079300	0	0		0	0.137432	0.204496	0
PcyM_0079400	0.0188037	1.88493		0.0230413	1.74486	0.0118014	4.84021
PcyM_0079500	0	0		0.497935	0	0	0
PcyM_0079600	0	0		0.208033	0.207288	0	0
PcyM_0079700	0	0		0.0319724	0.00926312	0	0
PcyM_0079800	0.115678	0.0317361		0.0708736	0	0	0
PcyM_0079900	0.0484325	0.0851753		0.199345	0.0788458	0.0293302	0
PcyM_0080000	0	0		0.116581	0.175734	0	0
PcyM_0080100	0	0		0	0.0108948	0	0
PcyM_0080200	0.0804345	0.848732		0.197122	0.196415	0.592642	0.726471
PcyM_0080300	0.177789	0		0.50833	0.434149	0	0.936696
PcyM_0080400	0	0		0	0	0	0
PcyM_0080500	0	0		0.0151677	0	0	0
PcyM_0080600	0.179008	0		0	0.221365	0	1.81887
PcyM_0080700	0.0104548	0.0330954		0.0640546	0	0	0
PcyM_0080800	0	0.0798263		0.0174906	0.0348558	0.0855768	0.0322298
PcyM_0080900	0	0.0209845		0.609218	0	0	0
PcyM_0081000	0	0		0.00505105	0	0	0.0197785
PcyM_0081100	0.068114	0		0.199176	0	0.413429	0
PcyM_0081200	0	0.0783009		0	0.0922207	0.00240741	0.0186171
PcyM_0100100	0.268921	0		0.49928	0.218896	1.41142	2.83366
PcyM_0100200	0.00637718	0.141311		0	0	0	0
PcyM_0100300	20.316	0.0638962		17.4372	17.2269	44.7206	115.126
PcyM_0100400	1.36789	0.00784443		0.00838077	0.835073	9.31927	3.08864
PcyM_0100500	0	0		0	0.0923086	0	0
PcyM_0100600	0.003923	0		0	0.0104312	0	0.00933421
PcyM_0100700	0	0		0	0.00404673	0	0
PcyM_0100800	0	0.241104		0.0559974	0.113024	0	0
PcyM_0100900	0.0575185	0		0.0759023	0	0	0
PcyM_0101000	0.198736	0		0.243523	0.24265	0	0
PcyM_0101100	7.68601	6.50343		15.4599	12.0403	11.5925	25.8683
PcyM_0101200	0.171604	0		0.52569	0.471425	0	3.87603
PcyM_0101300	0	0		0	0	0.197583	0
PcyM_0101400	0.0694756	0.146619		0.170265	1.35724	0.378663	0.00168681
PcyM_0101500	0.613357	0.647205		1.50316	0	0	0
PcyM_0101600	0.214701	0.00739367		0.0873525	0	0.639945	1.5907
PcyM_0101700	0.112891	0		0	0	0	0
PcyM_0101800	0	0		0	0	0	0
PcyM_0101900	0	0.203995		0	0	0	0
PcyM_0102000	0.047584	0		0.117485	0.116197	0	2.36374
PcyM_0102100	0.160896	0		0.39431	0.0982241	0	0
PcyM_0102200	0	1.1878		0	0	0	0
PcyM_0102300	12.6978	25.3899		59.2838	97.7603	110.184	26.6301
PcyM_0102400	10.0401	17.5924		37.3819	44.4809	20.1073	15.0582
PcyM_0102500	4.18267	6.27537		10.0448	10.5976	24.5295	7.62157
PcyM_0102600	28.3575	41.0278		30.9784	20.6366	31.4088	61.2215
PcyM_0102700	2.21123	0.777751		10.3866	7.19955	24.1118	47.4322
PcyM_0102800	1.7408	0.459216		2.43783	5.3228	6.72059	2.96846
PcyM_0102900	2.0537	3.28791		5.29336	8.81946	4.11707	7.6753
PcyM_0103000	0	0		0	0	0	0
PcyM_0103100	0	0.0108149		0	0	0	0
PcyM_0103200	119.871	97.9617		104.894	96.683	106.416	103.271
PcyM_0103300	73.1707	61.0964		59.9228	50.4259	82.1478	72.2772
PcyM_0103400	68.984	71.3944		72.9756	76.1477	150.123	87.7801
PcyM_0103500	67.4672	68.1741		69.7668	52.1564	19.278	49.449
PcyM_0103600	47.618	44.0635		41.0661	44.6536	55.3294	41.4396
PcyM_0103700	39.0849	46.9079		42.5741	32.8574	23.3182	56.6098
PcyM_0103800	86.1758	93.9551		74.759	60.3972	61.0448	49.0333
PcyM_0103900	45.7103	47.8685		74.4576	91.0521	122.817	53.4769
PcyM_0104000	48.6953	31.8702		34.7441	35.3721	91.0279	63.8239
PcyM_0104100	9.35937	12.1135		11.2785	8.14444	13.8097	16.346
PcyM_0104200	46.9496	67.3525		38.1025	29.5385	23.5019	57.6803
PcyM_0104300	30.6334	41.0509		32.3932	28.3114	32.9868	36.0154
PcyM_0104400	33.8119	46.1396		47.7236	42.7686	26.2227	48.3987
PcyM_0104500	95.183	89.105		91.8035	95.0762	77.6288	148.538
PcyM_0104600	65.2474	53.6434		71.6987	68.7256	31.9513	50.1351
PcyM_0104700	96.1036	68.222		89.7635	95.858	64.9907	106.993
PcyM_0104800	12.8994	16.4274		34.4743	33.5741	11.9601	26.3141
PcyM_0104900	52.3385	58.3338		66.8383	48.6044	158.69	69.9128
PcyM_0105000	38.1977	53.0985		36.5633	44.151	124.5	65.6621
PcyM_0105100	31.7961	49.6294		25.2936	25.434	15.1601	43.8557
PcyM_0105200	91.8101	119.901		65.1304	64.6806	6.7263	84.3988
PcyM_0105300	35.1512	43.6084		38.5727	30.9513	26.5152	37.917
PcyM_0105400	75.9886	83.9973		95.0324	95.0795	114.028	63.4502
PcyM_0105500	46.2009	39.7724		44.8224	39.8072	35.8283	27.2919
PcyM_0105600	47.6954	62.4947		43.1292	46.9508	33.761	56.9985
PcyM_0105700	14.5503	14.8067		35.4162	33.9439	17.0413	9.69668
PcyM_0105800	35.8972	34.3573		34.2195	35.4948	22.8814	26.3451
PcyM_0105900	72.7832	87.7024		103.993	95.4226	64.4589	111.015
PcyM_0106000	193.077	165.596		185.499	185.463	203.448	200.464
PcyM_0106100	52.1483	60.7394		43.754	48.7477	26.8722	54.1359
PcyM_0106200	34.3405	58.0163		42.9792	27.1264	16.4462	38.5888
PcyM_0106300	1211	1016.75		866.414	881.586	1728.62	694.146
PcyM_0106400	9.99123	16.6438		20.1105	12.1802	19.8779	33.4358
PcyM_0106500	1281.07	1090.75		932.725	992.172	2034.99	797.034
PcyM_0106600	192.711	177.838		140.932	153.026	243.954	149.131
PcyM_0106700	33.755	25.7613		25.7537	32.66	33.941	56.5639
PcyM_0106800	70.1467	73.2991		67.262	62.6509	17.834	66.9187
PcyM_0106900	86.3184	71.1806		78.1727	73.421	10.6454	64.3338
PcyM_0107000	86.4177	90.8747		82.4135	75.0888	18.3395	54.9293
PcyM_0107100	197.583	192.346		148.813	173.65	356.419	206.363
PcyM_0107200	9.52446	11.7251		26.3984	35.164	14.8318	5.12044
PcyM_0107300	74.1564	91.7968		69.072	65.9567	60.7628	26.7341
PcyM_0107400	38.0467	68.516		42.7143	37.9053	22.4907	24.4179
PcyM_0107500	40.9786	42.0527		49.6065	42.1161	25.5253	48.0942
PcyM_0107600	12.2312	13.0346		19.8344	12.9279	5.52769	9.48067
PcyM_0107700	0	0		0	0	0	0
PcyM_0107800	0.0130196	0		0	0	0	0.052713
PcyM_0107900	0	0		0	0	0	0
PcyM_0108000	0	0.00986533		0	0	0	0
PcyM_0108100	47.5371	54.0957		51.6643	48.9163	47.7404	60.9852
PcyM_0108200	36.2604	88.6057		196.866	213.164	103.203	83.3559
PcyM_0108300	80.6248	108.445		85.9198	58.9091	66.2421	75.6939
PcyM_0108400	76.4594	71.2054		91.9166	97.3881	120.902	77.8666
PcyM_0108500	28.9803	36.7835		43.4817	34.0321	15.3654	12.1223
PcyM_0108600	24.1207	40.0322		30.3656	30.6335	7.75823	21.5927
PcyM_0108700	82.5143	65.2115		70.5038	65.71	17.7154	73.5395
PcyM_0108800	95.9986	59.2473		67.6804	70.7583	187.352	54.4051
PcyM_0108900	22.9197	20.9006		19.9414	21.374	2.59144	6.00231
PcyM_0109000	83.0474	75.4718		95.3918	80.8096	52.335	54.2563
PcyM_0109100	73.7393	88.9572		87.39	72.1609	64.3843	83.4986
PcyM_0109200	7.94016	9.60528		18.2378	14.5623	5.07003	18.3036
PcyM_0109300	105.546	98.1558		93.0747	100.327	147.38	124.77
PcyM_0109400	995.226	981.133		771.439	757.552	1558.56	953.439
PcyM_0109500	7.65935	14.8649		6.00424	7.12484	15.8004	17.7484
PcyM_0109600	50.9312	75.0205		62.998	49.1994	7.03038	67.2691
PcyM_0109700	51.6493	50.6012		47.6907	46.9838	64.0629	53.6857
PcyM_0109800	379.02	336.453		366.4	373.594	568.183	291.037
PcyM_0109900	327.323	303.113		237.27	226.124	189.005	284.006
PcyM_0110000	40.596	38.3383		33.635	34.1468	25.7667	34.7226
PcyM_0110100	31.4247	24.8506		25.4229	34.2606	46.8617	3.81198
PcyM_0110200	165.89	128.631		135.516	137.332	186.082	62.4288
PcyM_0110300	21.6736	24.0181		16.8416	27.7536	33.6137	7.16168
PcyM_0110400	130.636	109.687		110.679	111.437	74.8439	97.7403
PcyM_0110500	95.1007	94.1721		82.93	86.1025	42.1305	102.385
PcyM_0110600	38.9098	40.8155		41.095	33.8842	17.9324	25.4784
PcyM_0110700	36.995	39.1525		50.445	45.6647	23.2325	39.8595
PcyM_0110800	81.0159	84.2522		80.9956	93.8586	111.055	131.419
PcyM_0110900	50.7285	71.9379		60.6067	52.8306	72.2828	58.8581
PcyM_0111000	203.151	178.398		163.32	154.201	142.971	126.772
PcyM_0111100	30.3352	32.4176		45.7293	58.511	27.4242	32.773
PcyM_0111200	20.634	18.7168		22.6225	18.5635	35.5141	7.35641
PcyM_0111300	37.6446	42.1549		33.8941	29.0808	8.93667	33.189
PcyM_0111400	41.7857	53.6157		52.3786	52.564	48.3266	64.5524
PcyM_0111500	97.395	112.786		109.99	128.032	104.932	48.3087
PcyM_0111600	90.0286	97.1582		96.6744	102.443	186.406	63.916
PcyM_0111700	43.5676	59.3625		54.4423	52.3558	4.73112	42.0802
PcyM_0111800	128.199	146.754		115.301	141.407	258.456	111.864
PcyM_0111900	77.5328	87.0206		77.5167	86.0484	56.4587	81.2091
PcyM_0112000	64.1563	78.7326		58.1437	62.9061	56.1107	43.744
PcyM_0112100	684.634	569.234		512.794	558.449	1148.83	600.272
PcyM_0112200	104.296	125.125		98.7878	90.7958	15.1719	117.696
PcyM_0112300	58.9008	72.2796		67.2416	68.5673	80.3049	71.5824
PcyM_0112400	220.194	196.916		181.868	170.1	219.177	229.904
PcyM_0112500	104.325	119.943		97.7757	88.4864	22.0568	71.7625
PcyM_0112600	11.2191	1.77573		8.94298	11.8717	23.7796	17.3104
PcyM_0112700	18.4962	19.7663		24.9092	22.6193	8.58872	13.4765
PcyM_0112800	47.5951	67.9322		53.6711	49.0666	22.7794	85.3889
PcyM_0112900	81.5457	85.9747		92.4623	91.7004	33.583	85.7374
PcyM_0113000	243.814	223.259		221.257	230.173	428.574	288.5
PcyM_0113100	168.179	183.463		193.596	213.117	102.942	191.731
PcyM_0113200	19.8968	31.7567		56.8444	93.0629	24.5205	36.4324
PcyM_0113300	47.6741	52.9771		60.9378	49.9908	46.4405	40.1418
PcyM_0113400	11.295	19.5741		16.3393	15.7061	24.5104	7.79275
PcyM_0113500	39.8719	44.4839		50.4181	33.0398	10.6078	40.5998
PcyM_0113600	158.557	163.253		136.563	167.472	114.512	203.011
PcyM_0113700	216.085	217.655		231.755	232.781	228.965	207.456
PcyM_0113800	20.0406	28.6685		48.8745	47.6954	14.6728	45.7043
PcyM_0113900	130.563	164.904		125.026	116.894	14.3784	120.804
PcyM_0114000	350.557	308.593		281.107	280.504	226.172	399.896
PcyM_0114100	71.1714	65.1765		59.6465	72.0396	102.169	74.9561
PcyM_0114200	89.7318	83.7801		81.026	81.7394	114.798	84.0675
PcyM_0114300	111.435	120.457		104.443	101.576	76.0353	99.8779
PcyM_0114400	49.49	55.7351		41.4404	44.6399	27.7244	44.3276
PcyM_0114500	41.9123	47.665		50.4065	51.2051	23.9716	15.5975
PcyM_0114600	57.9586	83.3565		55.8931	50.8095	11.3799	89.675
PcyM_0114700	0.799115	3.13194		1.25897	1.11508	0.622203	0.773301
PcyM_0114800	84.4354	92.8107		81.6296	84.5712	135.867	103.914
PcyM_0114900	153.496	166.735		147.639	128.397	191.052	167.171
PcyM_0115000	79.1985	86.8931		82.6818	75.1305	43.7104	89.1048
PcyM_0115100	122.668	92.57		128.874	133.269	76.1136	78.3271
PcyM_0115200	59.6609	75.3085		81.9732	82.6011	34.5654	80.8398
PcyM_0115300	43.2417	50.8457		40.5288	30.6029	13.4911	50.9524
PcyM_0115400	28.8837	39.5735		35.3922	32.0286	8.70173	56.1498
PcyM_0115500	110.068	87.4371		107.785	121.707	15.2806	87.4078
PcyM_0115600	87.289	107.325		82.0615	79.5952	126.193	103.641
PcyM_0115700	40.2092	46.6065		52.5226	41.0825	5.49151	25.8687
PcyM_0115800	24.2008	37.0711		31.845	29.1286	41.3442	36.4813
PcyM_0115900	0.68378	2.40986		1.40467	0.834872	2.89863	1.54395
PcyM_0116000	36.0896	50.4878		44.0726	43.1171	16.1691	42.035
PcyM_0116100	13.7197	22.161		16.6636	14.1723	2.41215	10.5381
PcyM_0116200	75.6472	81.073		78.4684	91.6176	78.7072	122.956
PcyM_0116300	14.0879	15.2088		20.4375	24.0219	30.8899	57.7698
PcyM_0116400	26.7773	36.3664		59.0713	49.3033	25.5079	20.2474
PcyM_0116500	15.7275	10.1081		18.9234	23.9161	58.1854	19.3702
PcyM_0116600	36.8301	33.2669		54.7732	77.4601	115.699	44.6148
PcyM_0116700	25.2717	28.7389		28.8037	26.2393	50.7055	39.4315
PcyM_0116800	100.811	81.8146		70.2166	66.8554	135.467	96.9608
PcyM_0117000	0.887713	1.17843		2.77205	2.4824	3.95389	6.53052
PcyM_0117100	0.335721	0.361194		0.411378	0	1.82978	3.03217
PcyM_0117200	19.5631	3.21484		20.2385	24.0816	92.35	78.9314
PcyM_0117300	27.2415	21.8852		24.6561	34.9617	14.6225	31.1045
PcyM_0117400	116.442	89.9123		75.987	80.3432	127.053	75.7594
PcyM_0117500	24.5996	21.631		37.486	32.3457	28.0757	18.515
PcyM_0117600	81.5459	81.6185		83.0762	90.4668	207.83	51.6599
PcyM_0117700	56.1866	58.3008		70.887	88.889	81.0148	62.7603
PcyM_0117800	92.688	100.462		101.901	88.8543	84.3068	30.3222
PcyM_0117900	35.4222	77.4631		50.4835	39.8413	12.3437	82.0179
PcyM_0118000	42.4893	50.3971		39.7816	34.5571	12.2249	40.141
PcyM_0118100	43.8889	47.3627		39.7917	40.1685	68.014	51.1506
PcyM_0118200	46.7034	61.1866		42.0839	41.7306	31.0405	53.9794
PcyM_0118300	87.3212	105.738		98.4575	79.5322	40.5562	123.071
PcyM_0118400	66.7055	79.9365		66.8465	63.0901	49.807	87.0549
PcyM_0118500	60.2027	64.8761		58.3368	59.3733	56.472	70.7545
PcyM_0118600	641.006	516.316		493.335	594.349	1020.53	498.37
PcyM_0118700	141.129	119.38		138.754	128.878	146.785	104.597
PcyM_0118800	40.6627	41.5152		39.2815	32.8647	9.02184	25.4796
PcyM_0118900	60.3042	69.9441		57.6834	50.139	7.44099	51.959
PcyM_0119000	35.518	42.3118		37.4346	40.0108	6.35891	16.0714
PcyM_0119100	30.4295	39.9402		38.9375	31.4142	13.6336	16.572
PcyM_0119200	37.8874	42.7659		33.1489	29.8987	11.6486	28.4535
PcyM_0119300	74.1762	68.0897		65.6785	65.2997	51.0887	44.1417
PcyM_0119400	22.0031	27.711		45.5393	46.9299	29.7427	46.1011
PcyM_0119500	34.854	58.4543		44.5318	36.8019	13.335	53.986
PcyM_0119600	31.7361	35.3588		44.2068	22.3928	16.6234	23.9368
PcyM_0119700	76.406	62.2547		77.8008	88.5702	67.0393	71.1233
PcyM_0119800	46.169	51.8246		50.8014	52.8413	95.8914	75.0477
PcyM_0119900	9.57435	16.8378		15.2872	13.4612	17.9215	24.894
PcyM_0120000	33.3605	47.0519		50.3385	47.4051	14.255	35.1127
PcyM_0120100	43.5769	47.4813		52.8406	47.4432	9.95531	35.1721
PcyM_0120200	38.4971	47.0444		37.2938	36.1916	48.1759	44.888
PcyM_0120300	24.6057	36.8423		27.8066	24.6871	14.3969	30.3639
PcyM_0120400	579.365	624.377		458.052	442.622	666.794	459.727
PcyM_0120500	18.0413	41.4061		37.275	32.8629	8.44151	17.5951
PcyM_0120600	4.52764	8.43087		12.075	13.0073	39.6768	18.6423
PcyM_0120700	99.5753	87.1646		85.9769	77.6903	30.9906	81.7845
PcyM_0120800	33.3501	54.5813		32.6445	25.7677	19.0736	48.301
PcyM_0120900	23.7215	42.458		26.1457	24.0926	20.0843	16.9094
PcyM_0121000	57.5457	72.9312		60.6555	51.4871	34.1296	57.3401
PcyM_0121100	296.053	233.545		206.117	216.621	455.042	282.773
PcyM_0121200	75.4181	62.4755		55.3252	52.7666	13.3031	49.538
PcyM_0121300	10.4167	15.1684		28.0302	31.4909	17.4865	19.7572
PcyM_0121400	2.29428	2.42295		3.88744	7.33657	0.396969	31.0823
PcyM_0121500	0.593359	0.626103		0.363539	0	1.078	0.66989
PcyM_0121600	29.1538	28.0611		31.9982	28.9624	40.1522	41.496
PcyM_0121700	20.7725	0.815199		52.0538	31.77	57.5844	165.94
PcyM_0121800	5.39991	2.85686		5.1556	2.39	6.27601	7.79495
PcyM_0121900	1.30854	0		1.20258	2.40165	2.97766	5.17062
PcyM_0122000	9.55812	8.74084		15.0956	11.1515	16.5931	26.3778
PcyM_0122100	0.758178	0.320007		0.371616	0	0.826461	0
PcyM_0122200	5.20858	3.84172		9.33687	11.6293	5.06561	22.6956
PcyM_0122300	0.611067	0.21493		1.49755	0.130566	0	1.37976
PcyM_0122400	0.0777745	0.164133		0.285905	0.289009	0.0122868	0
PcyM_0122500	1.15965	0.563265		1.19919	1.30352	4.04085	27.3204
PcyM_0122600	0.0514765	0.144518		0	0.21005	0	0
PcyM_0122700	0.858716	0.0751354		1.04321	0.0106613	0.237956	15.2307
PcyM_0122800	5.01538	2.41997		3.83215	1.27281	2.27269	25.4998
PcyM_0122900	0.0689583	0.254673		1.05623	0.294685	0	2.25772
PcyM_0123000	0.313436	0		0	0	0	0
PcyM_0123100	0	0.114809		0.266649	0	0.790692	0.985347
PcyM_0123200	0.267079	0.915908		0.572718	0.411694	0.00933118	0.761355
PcyM_0123300	0.10055	0		0.338826	0.644532	1.00472	0.794631
PcyM_0123400	4.34643	0.254794		22.4873	19.7533	57.9075	37.0754
PcyM_0123500	0.0760386	0		0.41505	0.280632	0.505484	0.819439
PcyM_0123600	0	0		1.46739	1.46213	6.96196	18.4087
PcyM_0123700	0.0334136	0.0388124		0.0901436	0.0449103	0	0
PcyM_0123800	0.0173158	0		0	0	0	0
PcyM_0123900	0	0		0	0	0.423914	0
PcyM_0124000	0.418852	0		0.0102649	0	0	0
PcyM_0124100	0.107496	0.180776		0.263441	0.276989	0.0244119	0.83652
PcyM_0124200	0.0907648	0.0294688		0.179662	0	0.152214	5.12808
PcyM_0200100	0	0		0	0	0	0
PcyM_0200200	0.179335	0.0920587		0.213811	0.852177	0	8.86472
PcyM_0200300	0.0266683	0.33768		0.490173	0.195366	0.654077	6.50331
PcyM_0200400	0.40731	0.530375		1.03006	0.698352	0.0314889	3.09172
PcyM_0200500	0.0408583	0.538913		0.50066	0.299319	0.51961	1.56836
PcyM_0200600	0	0		0.0890692	0	0	0
PcyM_0200700	0.134513	0.0709681		0.329653	0.328472	0	0
PcyM_0200800	0.346209	0.726503		1.1437	0.179937	1.51721	1.66554
PcyM_0200900	0.208917	0.188954		0.0731425	0.218641	0	2.83036
PcyM_0201000	0.160752	0.0678491		0.63033	0.314036	0.175229	0.145188
PcyM_0201100	0	0		0	0	0	18.9106
PcyM_0201200	0	0		0.588809	0	0	0
PcyM_0201300	0.0972657	0.052343		0.238371	0.417067	0.176709	0.219622
PcyM_0201400	0.0986437	0.338284		0.382767	0.391432	0	1.3364
PcyM_0201500	0	0.111075		0	0	0	0
PcyM_0201600	0	0		0	0	0	0
PcyM_0201700	0.0290398	0		0.214551	0.177283	0	0
PcyM_0201800	0	0.614882		0.704265	0	0	0
PcyM_0201900	0.239386	0.196464		0.391112	0.227331	0.00166632	0.360349
PcyM_0202000	0.0852946	0.0900015		0.15778	0.130845	0.000624841	0
PcyM_0202100	1.34695	0.636281		0.496594	3.84528	1.40705	0.104299
PcyM_0202200	0	0.00355321		0.268206	0	0	0
PcyM_0202300	4.70417	3.37536		13.1426	14.4739	22.2206	62.4563
PcyM_0202400	1.06872	0		1.30956	0	0.647204	0
PcyM_0202500	18.5827	30.0613		68.3447	71.3045	60.0038	52.3508
PcyM_0202600	8.86697	19.3948		48.8935	74.205	117.967	33.3688
PcyM_0202700	3.50998	9.829		12.903	18.6257	17.9042	66.1466
PcyM_0202800	0.383251	0.4044		1.16023	1.01845	0.204788	1.93434
PcyM_0202900	20.3452	21.6755		33.3201	42.2771	29.8544	58.7484
PcyM_0203000	23.102	25.6034		36.1419	30.6903	12.1426	79.2292
PcyM_0203100	5.13979	9.1342		17.2369	20.8127	37.8428	87.3462
PcyM_0203200	0	0		0.591873	0	0	0
PcyM_0203300	0.666221	0.615113		1.12249	2.4403	6.95963	74.2747
PcyM_0203400	13.2021	11.1769		19.7513	22.6794	16.4549	46.7943
PcyM_0203500	3.48615	1.57651		11.8999	14.2896	13.3456	39.639
PcyM_0203600	1.24566	0.788642		3.15452	4.10646	3.31918	16.3134
PcyM_0203700	52.7011	48.3622		48.4957	44.7932	104.764	56.1972
PcyM_0203800	6.7093	1.74939		11.7447	12.525	29.9319	30.8836
PcyM_0203900	27.6841	31.3947		29.1565	28.8983	45.2109	37.5058
PcyM_0204000	199.488	280.068		226.89	169.036	421.343	26.8442
PcyM_0204100	44.2649	38.9767		50.6867	55.9096	109.814	64.7941
PcyM_0204200	8.20103	7.11955		10.8257	7.14576	4.46981	5.72361
PcyM_0204400	5.23157	3.44061		4.26186	4.24658	5.52897	11.7799
PcyM_0204500	99.048	91.7776		73.9003	65.974	106.633	76.9253
PcyM_0204600	110.988	87.1936		77.7076	76.9059	99.7161	99.2556
PcyM_0204700	151.898	156.501		107.867	112.159	119.54	127.58
PcyM_0204800	143.267	139.275		111.861	109.924	174.556	131.88
PcyM_0204900	92.6098	94.9245		77.399	78.2695	100.314	66.1969
PcyM_0205000	134.86	139.555		101.808	109.11	126.042	132.871
PcyM_0205100	75.8298	82.538		86.98	80.9605	34.5065	79.3204
PcyM_0205200	12.1125	18.1773		17.4807	19.3899	16.1374	18.866
PcyM_0205300	46.144	66.438		54.4618	52.4499	29.8688	64.3984
PcyM_0205400	105.634	118.475		83.953	83.4656	207.107	70.365
PcyM_0205500	58.7097	46.8399		24.565	40.2122	78.0454	22.6329
PcyM_0205600	22.8389	26.4837		32.1228	31.2686	3.4211	15.975
PcyM_0205700	114.237	96.4099		88.7696	90.0539	118.539	99.2636
PcyM_0205800	213.58	184.035		191.02	207.238	204.897	237.144
PcyM_0205900	39.1544	51.8239		44.8019	44.9745	38.6655	22.1793
PcyM_0206000	177.287	165.263		127.083	133.083	166.294	111.414
PcyM_0206100	44.4929	60.1479		53.411	54.4575	26.4332	49.3299
PcyM_0206200	18.5819	24.5922		20.4836	13.4589	42.3418	17.7784
PcyM_0206300	23.7745	44.3084		28.9047	26.6903	4.04734	22.5835
PcyM_0206400	196.103	201.752		187.604	190.152	202.613	216.83
PcyM_0206500	51.9442	48.8116		46.7146	36.6018	71.1302	55.7426
PcyM_0206600	29.1629	28.0378		29.6473	23.4521	8.06929	25.6
PcyM_0206700	30.2184	29.6465		34.7992	27.5175	30.8467	32.4044
PcyM_0206800	156.381	148.6		143.597	158.22	247.052	116.994
PcyM_0206900	50.3146	53.9406		74.4772	76.6676	47.5332	89.9777
PcyM_0207000	58.6665	68.6327		75.5339	78.1179	54.0774	49.4349
PcyM_0207100	41.112	34.0849		46.3324	39.7388	28.4537	32.0482
PcyM_0207200	38.8535	40.6722		63.8638	52.7098	28.5713	26.4581
PcyM_0207300	41.2287	39.8673		57.2481	44.5725	19.7113	38.0441
PcyM_0207400	126.144	133.643		125.29	133.035	102.909	155.543
PcyM_0207500	60.9924	43.9666		35.9248	41.3209	59.2581	21.0728
PcyM_0207600	57.7356	57.8333		44.7735	59.788	72.5789	27.5013
PcyM_0207700	141.915	125.916		106.705	108.644	173.929	122.611
PcyM_0207800	98.6431	107.798		91.7854	94.8376	170.17	85.4928
PcyM_0207900	14.9741	15.6167		15.6259	15.5699	7.19103	25.6624
PcyM_0208000	201.771	200.612		151.452	160.083	235.284	171.189
PcyM_0208100	22.0098	17.1407		26.5902	44.6072	14.4777	51.3506
PcyM_0208200	27.5171	30.7595		92.178	139.834	142.279	35.7396
PcyM_0208300	7.24784	10.9729		18.6656	28.9236	45.8006	13.282
PcyM_0208400	111.608	112.346		93.2452	106.485	147.039	85.0807
PcyM_0208500	35.7092	60.1866		47.9894	46.0896	4.83995	42.2884
PcyM_0208600	171.705	190.675		180.817	184.867	252.797	209.946
PcyM_0208700	282.055	203.455		275.824	293.871	465.894	485.562
PcyM_0208800	128.73	114.906		103.446	117.016	163.667	132.261
PcyM_0208900	74.5772	91.0715		66.7574	66.7733	32.1109	77.8311
PcyM_0209000	109.457	97.2069		114.828	95.534	31.2374	76.5689
PcyM_0209100	519.627	446.837		421.722	477.911	805.309	436.021
PcyM_0209200	72.3289	70.5711		86.7927	73.9252	58.5259	85.8099
PcyM_0209300	59.1074	64.1084		64.8067	54.2865	17.1891	59.7824
PcyM_0209400	33.0064	32.8987		34.4738	32.3172	7.06129	15.7451
PcyM_0209500	23.9063	54.1508		30.0479	28.4924	6.05348	71.8868
PcyM_0209600	44.2384	50.5877		48.4247	48.7445	33.173	31.0186
PcyM_0209700	207.216	190.771		151.563	180.267	289.088	130.511
PcyM_0209800	104.422	122.593		92.4983	90.2166	134.745	97.5337
PcyM_0209900	65.5526	67.1489		66.2454	57.1696	96.6672	47.0957
PcyM_0210000	134.716	124.475		136.603	150.84	205.541	165.82
PcyM_0210100	75.6752	82.4106		68.9524	86.079	158.636	123.804
PcyM_0210200	200.459	175.887		226.275	263.811	453.386	204.206
PcyM_0210300	53.692	59.846		63.2077	56.066	25.7841	102.726
PcyM_0210400	19.8955	29.1046		27.7036	33.1251	50.111	13.2728
PcyM_0210500	95.0407	106.553		112.81	128.36	206.104	60.3506
PcyM_0210600	2.52731	2.28581		2.65445	3.9674	3.93561	0
PcyM_0210700	125.548	145.451		176.838	197.538	323.326	204.575
PcyM_0210800	2.35965	7.96758		8.67425	5.76211	15.433	6.3936
PcyM_0210900	42.1865	54.7265		36.2114	33.1196	20.3774	31.8135
PcyM_0211000	14.6254	32.7666		31.3623	34.9146	20.0274	36.4737
PcyM_0211100	24.2952	40.0244		34.4984	28.8194	3.69858	25.8892
PcyM_0211200	121.474	128.226		99.6981	113.594	198.74	133.962
PcyM_0211300	95.3613	94.7104		92.7513	90.6547	33.9104	40.1735
PcyM_0211400	40.4882	53.4939		64.4896	71.0558	96.9718	60.3238
PcyM_0211500	105.155	113.655		98.0006	110.411	94.0232	73.5168
PcyM_0211600	80.8016	70.9512		85.3299	100.044	111.933	92.9717
PcyM_0211700	260.974	195.201		261.789	262.272	273.958	209.787
PcyM_0211800	130.592	142.729		183.947	196.344	158.479	135.313
PcyM_0211900	35.2915	56.9268		34.9615	30.2	6.1542	42.1829
PcyM_0212000	10.6981	20.5712		10.8068	17.0106	22.7691	50.3082
PcyM_0212100	56.329	49.3801		53.6303	46.2836	17.8398	50.604
PcyM_0212200	81.3582	86.5063		77.7803	69.8137	110.915	96.6868
PcyM_0212300	30.3889	44.8289		78.8841	100.327	146.196	56.8797
PcyM_0212400	184.853	172.206		244.182	293.934	363.244	218.063
PcyM_0212500	137.786	124.962		114.622	111.59	130.613	64.7524
PcyM_0212600	147.126	142.539		126.621	125.295	178.323	135.114
PcyM_0212700	119.695	117.109		138.062	141.341	209.036	89.2164
PcyM_0212800	230.866	182.995		178.593	215.6	251.385	147.217
PcyM_0212900	18.4635	12.6509		14.3974	11.4181	20.0393	4.87285
PcyM_0213000	27.9154	26.3968		32.0291	33.6841	22.9368	32.8357
PcyM_0213100	10.1826	13.6226		10.8137	6.63075	33.2991	12.2624
PcyM_0213200	23.1156	24.4539		35.7587	18.5469	11.5397	39.1024
PcyM_0213300	37.4124	42.0707		33.6664	28.6508	41.6963	48.8322
PcyM_0213400	130.743	131.625		155.204	149.304	122.624	126.8
PcyM_0213500	19.9239	40.3454		23.426	22.4984	45.6126	25.4841
PcyM_0213600	34.8757	65.9471		36.3394	34.8766	18.3002	55.1111
PcyM_0213700	277.378	288.806		334.789	397.436	328.819	161.056
PcyM_0213800	34.2884	24.9805		48.2749	45.3888	27.8702	37.2311
PcyM_0213900	14.575	21.2692		25.0794	29.1544	37.1838	22.4066
PcyM_0214000	64.1236	64.18		64.5999	69.2648	43.6393	25.9393
PcyM_0214100	16.3078	22.6984		33.7211	30.3909	5.4577	26.4055
PcyM_0214200	63.3233	68.4573		66.0336	58.4818	23.361	56.1544
PcyM_0214300	35.907	36.9611		35.3837	30.0194	10.7584	34.8213
PcyM_0214400	49.3641	75.561		52.4303	43.9225	61.2791	50.2832
PcyM_0214500	47.3846	52.7197		59.8651	54.3155	14.1476	44.9275
PcyM_0214600	9.49009	11.5159		14.2452	14.7735	6.46549	4.82135
PcyM_0214700	74.3479	84.5855		80.0927	69.0502	64.3357	41.7918
PcyM_0214800	92.3722	86.8909		91.0507	86.1515	30.8167	63.8192
PcyM_0214900	565.086	402.108		376.529	368.715	586.679	302.636
PcyM_0215000	37.6884	51.6144		52.2264	46.1594	11.2653	49.9143
PcyM_0215100	71.451	68.5724		74.8052	83.0618	106.139	122.752
PcyM_0215200	129.574	107.293		104.772	100.09	78.9801	114.137
PcyM_0215300	84.4508	77.5264		69.9082	65.7785	40.7814	80.2979
PcyM_0215400	43.1438	48.978		53.3968	48.6811	11.0055	38.2278
PcyM_0215500	37.8599	42.6471		36.3717	24.5559	13.9492	24.8921
PcyM_0215600	105.861	116.247		77.7774	75.2136	102.139	91.0741
PcyM_0215700	46.5097	60.2211		64.8268	72.7885	47.1124	90.1305
PcyM_0215800	81.1437	74.8121		70.7798	75.4796	144.832	85.9015
PcyM_0215900	64.0302	56.129		49.7185	57.2089	97.849	51.9576
PcyM_0216000	107.89	102.889		103.536	96.6354	49.5646	86.9793
PcyM_0216100	53.7953	58.4453		49.0483	51.5185	36.129	28.7838
PcyM_0216200	51.4626	52.8124		58.4604	49.6417	61.0974	65.3303
PcyM_0216300	40.0663	49.6721		50.7653	42.0051	18.9694	9.75009
PcyM_0216400	58.6237	48.6776		48.9392	49.4083	18.6673	80.3277
PcyM_0216500	71.4442	65.3877		68.6386	67.0488	68.1581	65.0442
PcyM_0216600	358.037	291.18		281.766	297.423	499.424	299.166
PcyM_0216700	44.7462	43.9211		47.5173	49.1538	19.5944	54.137
PcyM_0216800	87.6281	67.0735		81.1414	71.8884	21.2464	80.5259
PcyM_0216900	46.0228	45.8293		43.5086	39.6883	19.7747	35.6515
PcyM_0217000	75.0841	87.5212		87.6009	68.1579	37.4565	78.3136
PcyM_0217100	45.6313	49.3758		41.4833	35.8061	34.3609	28.7111
PcyM_0217200	290.453	228.878		195.376	217.442	351.076	205.624
PcyM_0217300	15.6934	23.3414		16.4039	16.5376	27.9015	14.9185
PcyM_0217400	37.9532	33.712		46.3134	50.6743	42.42	51.9828
PcyM_0217500	128.776	116.829		116.467	113.282	178.958	139.705
PcyM_0217600	67.2938	59.1019		51.6674	45.2776	102.875	44.4818
PcyM_0217700	13.0286	10.777		11.2636	9.35266	6.03051	8.0715
PcyM_0217800	52.0451	69.5322		58.1246	58.0862	105.375	76.2576
PcyM_0217900	11.9953	26.8923		63.9019	76.4105	69.2637	43.1735
PcyM_0218000	125.001	125.702		121.402	113.888	69.2739	110.495
PcyM_0218100	120.767	132.541		109.427	118.198	264.398	130.356
PcyM_0218200	164.993	167.823		134.848	138.282	312.268	121.944
PcyM_0218300	39.7424	62.2757		35.0005	36.826	16.1486	65.4484
PcyM_0218400	149.588	137.281		113.564	112.323	109.737	188.094
PcyM_0218500	64.9215	65.6602		71.8316	46.5909	18.8313	65.4773
PcyM_0218600	134.014	106.219		104.337	98.2802	78.597	127.738
PcyM_0218700	85.5037	86.734		78.203	78.4039	67.8524	103.555
PcyM_0218800	254.405	252.14		214.032	232.597	389.689	300.735
PcyM_0218900	98.7181	83.4435		101.995	113.323	165.516	119.47
PcyM_0219000	38.8735	40.9022		46.822	44.5237	56.9808	85.7798
PcyM_0219100	36.5129	30.455		33.8357	32.0045	33.4156	36.5443
PcyM_0219200	72.3591	68.2184		52.7555	56.2963	60.1475	47.4831
PcyM_0219300	59.8125	59.0383		53.9095	43.7027	10.3463	33.7599
PcyM_0219400	103.873	81.5646		82.8372	83.9091	73.4927	73.6534
PcyM_0219500	85.1361	76.6296		77.4187	65.0396	43.8733	63.6428
PcyM_0219600	15.0026	13.5325		24.0172	28.9537	39.5656	10.3811
PcyM_0219700	58.0127	64.2978		44.8801	38.6019	85.8489	45.8197
PcyM_0219800	0.247915	0.966659		1.24728	4.47413	0.0387058	2.79503
PcyM_0219900	0	0.086084		0	0	0	0
PcyM_0220000	0	0		0	0	0	0
PcyM_0220100	6.65147	1.47758		10.0808	12.6092	34.3445	20.1732
PcyM_0220200	17.9745	21.8177		56.1516	73.1163	81.7235	15.9868
PcyM_0220300	6.3975	11.2534		59.3287	49.7088	67.6235	96.7488
PcyM_0220400	1.39818	3.58295		6.05762	4.93847	4.44529	10.0348
PcyM_0220500	6.73598	20.543		28.2016	42.9902	87.3075	21.4077
PcyM_0220600	0	0.0025736		0	0	0	0
PcyM_0220700	8.21447	0.50248		10.9409	17.9515	37.7421	24.4618
PcyM_0220800	0.238431	0.441513		1.53385	2.11059	1.73269	0
PcyM_0220900	0.918423	0.193821		0.675238	1.27088	1.00114	16.5901
PcyM_0221000	0	0		0.152017	0.530153	0.225388	0.280121
PcyM_0221100	0.0305117	0		0.33649	0.223523	0	0
PcyM_0221200	0.409261	0.104239		0.484198	1.20616	2.6921	0
PcyM_0221300	2.39587	2.27676		3.9395	3.60489	1.01125	4.20761
PcyM_0221400	4.43255	5.08036		7.03785	7.2782	3.05456	16.5658
PcyM_0221500	10.295	10.5127		20.0756	22.9771	4.42452	21.496
PcyM_0221600	0	0.0812947		0.251748	0	0	0.0579867
PcyM_0221700	0	0		0	0.506383	0	25.2846
PcyM_0221800	0.134811	0.160032		0.371682	0.0823	0	0.799045
PcyM_0221900	0.015599	0.11061		0	0.22398	0	0.355038
PcyM_0222000	0.190339	0		0.218656	0	0.0202619	0
PcyM_0222100	0.159163	0.104243		0.860831	1.01305	1.95434	3.64341
PcyM_0222200	0.288194	0.221162		1.06234	0.415852	0.666377	0
PcyM_0222300	3.68745	4.52361		6.07969	5.60036	5.0186	2.88658
PcyM_0222400	0.141966	0.149801		0.637851	0.115557	0	0.106851
PcyM_0222500	0.027003	0.0119671		0	0.0164849	0	0
PcyM_0222600	0	0.106444		0.329628	1.47801	0.36654	0
PcyM_0222700	0.764329	0.492642		1.27129	2.46921	0	3.05555
PcyM_0222800	0	0		0	0	0	0
PcyM_0300100	0.258013	0.369935		0.356344	0.299487	0.462403	1.47577
PcyM_0300200	1.29203	1.22378		1.82418	1.31946	1.27869	0.687609
PcyM_0300300	0.992039	0.486876		4.25532	2.56302	1.74842	3.71594
PcyM_0300400	0	0		0.0291512	0	0	0
PcyM_0300500	0	0		0	0	0	0
PcyM_0300600	0.0421035	0.0137512		0.0291606	0.0290561	0.100169	0
PcyM_0300700	0	0		0	0	0	0
PcyM_0300800	0	0		0	0	0	0
PcyM_0300900	0	0		0	1.39831	0.0297237	0
PcyM_0301000	0	0		0	0	0	0
PcyM_0301100	0.0155594	0		0.171592	0	0	0
PcyM_0301200	0	0		0.0100433	0	0	0
PcyM_0301300	0.118157	0.124677		1.01775	0.0721328	0.00258631	0
PcyM_0301400	0.0746798	0.0776938		0.126819	0.233654	0.187479	1.93151
PcyM_0301500	0	0		0.0135618	0	0.0108915	0
PcyM_0301600	0	0		0	0.00858375	0.0255449	0
PcyM_0301700	0.00335928	0.446628		0	0	0	0
PcyM_0301800	0.453978	2.15564		0.834429	0.277146	0	0
PcyM_0301900	0	0		0.403193	0	0	0.00260505
PcyM_0302000	0	0		0	0	0	0.263008
PcyM_0302100	0.16644	0		0.122369	0.0406434	0	0
PcyM_0302200	0	0		0.00808351	0	0	0
PcyM_0302300	0	0		0	0.161646	0.00559362	0
PcyM_0302400	0.0760028	0		0.558784	0.0927968	0	0
PcyM_0302500	23.4829	18.0563		23.7426	17.6145	11.675	51.7514
PcyM_0302600	22.2715	19.0059		17.4481	16.9893	26.9748	32.4263
PcyM_0302700	11.393	13.9827		14.0133	14.0428	13.7258	31.3138
PcyM_0302800	8.84732	8.70263		9.37115	10.253	9.53515	16.9296
PcyM_0302900	13.9738	14.4133		15.7451	14.9043	9.62959	21.3974
PcyM_0303000	0.33215	0.934612		1.22923	0.946269	0.0309457	5.78831
PcyM_0303100	0.0132171	0		0.68022	1.01667	0	15.0412
PcyM_0303200	0.749215	0		0	0	0.0234681	0
PcyM_0303300	0	0		1.35561	0	0	0
PcyM_0303400	0.372489	0		0.00894966	0	0	2.5232
PcyM_0303500	0	0.197531		3.21142	0.685694	3.06089	66.3623
PcyM_0303600	11.1324	20.9311		54.0968	75.7905	122.441	18.6111
PcyM_0303700	6.57249	4.20032		11.2188	12.1538	28.9277	48.5359
PcyM_0303800	0	0		0	0	0	16.186
PcyM_0303900	0.0532612	0.281002		0.130528	0.013006	0	0.962093
PcyM_0304000	0.0878057	0.00102946		0.430374	0	0	0
PcyM_0304100	0.399327	0.00951218		0.872653	0.374226	0	4.26349
PcyM_0304200	0	0		0	0.190642	0	0
PcyM_0304300	0	0		2.09327	1.04288	0	0
PcyM_0304400	0	0.293584		0.170466	0.509564	0	0
PcyM_0304500	0	0.224607		0.0372614	0.525565	0	0.485797
PcyM_0304600	22.5887	6.28252		18.992	15.1161	91.6867	36.4903
PcyM_0304700	0	0		0	0	0	0
PcyM_0304800	97.2986	78.2007		74.1416	64.2751	75.0471	81.9059
PcyM_0304900	61.686	71.6766		66.7742	61.076	88.5253	49.8968
PcyM_0305000	70.485	60.3603		61.672	64.5804	95.0359	79.9707
PcyM_0305100	41.2554	47.2796		32.7732	26.484	48.1724	43.3121
PcyM_0305200	47.1636	49.0993		40.3056	47.4038	66.4282	67.8484
PcyM_0305300	32.0342	33.3974		27.3791	25.9829	18.1119	18.5749
PcyM_0305400	70.4883	56.1728		77.2198	99.1696	43.6117	65.4182
PcyM_0305500	124.601	95.962		106.157	100.455	80.6985	115.127
PcyM_0305600	20.8296	28.6929		31.845	31.485	2.25109	9.53061
PcyM_0305700	63.2889	77.1544		77.6819	74.572	61.3198	89.69
PcyM_0305800	46.1134	45.7371		66.0431	57.385	17.6025	67.9343
PcyM_0305900	15.099	23.2914		21.4972	17.6014	6.0088	29.0602
PcyM_0306000	8.72381	6.83817		7.63556	8.52117	8.15099	5.0652
PcyM_0306100	153.291	132.406		108.358	110.002	189.694	158.513
PcyM_0306200	13.1723	8.55337		7.4496	7.43272	11.9655	1.19161
PcyM_0306300	144.909	201.546		155.65	157.546	52.2804	179.336
PcyM_0306400	183.011	126.884		125.099	133.914	231.265	112.891
PcyM_0306500	26.1754	22.1188		30.6103	36.1365	48.1467	74.0627
PcyM_0306600	72.4556	69.5901		65.2803	61.3765	57.9301	99.8332
PcyM_0306700	145.696	197.835		72.1269	62.3624	85.6845	53.8763
PcyM_0306800	44.5857	98.3087		74.7655	82.7837	112.926	32.8297
PcyM_0306900	1.95485	2.29916		4.24327	4.15986	3.14563	3.15284
PcyM_0307000	20.9016	49.3911		92.5703	127.651	158.415	45.5738
PcyM_0307100	79.4167	75.531		64.3922	62.9764	34.785	96.4398
PcyM_0307200	80.7093	77.8113		79.629	81.3349	59.7979	63.4458
PcyM_0307300	6.82751	8.05091		6.01027	7.65226	9.40615	7.38338
PcyM_0307400	15.3598	29.9452		42.3479	40.5951	18.0363	39.1228
PcyM_0307500	2051.58	3036.36		1824.81	1616.24	1122.45	1259.71
PcyM_0307600	84.3423	95.8207		68.2478	56.2121	91.5629	76.9844
PcyM_0307700	66.3391	54.8293		40.615	42.187	52.7104	51.813
PcyM_0307800	125.226	108.944		96.3917	117.233	223.484	92.7282
PcyM_0307900	126.416	101.755		90.3265	115.971	232.278	123.878
PcyM_0308000	54.8571	87.409		49.9835	38.0446	12.5111	40.1597
PcyM_0308100	111.01	97.7456		104.178	102.877	159.876	88.5344
PcyM_0308200	39.5411	51.8528		54.6983	52.3036	42.2975	54.8492
PcyM_0308300	67.1838	58.2655		70.7821	75.056	100.093	98.0484
PcyM_0308400	206.529	167.176		159.59	168.166	118.174	153.789
PcyM_0308500	36.4521	43.7797		79.4955	91.0838	91.6717	38.6944
PcyM_0308600	140.58	139.186		109.507	109.172	145.439	113.228
PcyM_0308700	84.4567	91.0768		68.4178	77.8668	108.884	87.4703
PcyM_0308800	14.6838	19.7488		17.9949	18.0327	17.6344	15.6711
PcyM_0308900	69.1033	72.6808		69.8635	67.7132	116.171	77.6385
PcyM_0309000	77.8662	74.6373		101.879	109.454	96.3348	83.5107
PcyM_0309100	166.303	157.887		154.562	137.972	110.207	117.253
PcyM_0309200	4.82444	7.74998		6.41165	7.86568	2.09311	17.7763
PcyM_0309300	66.5449	62.6491		60.922	53.7342	38.4742	86.4353
PcyM_0309400	134.395	133.22		110.867	99.0685	159.976	154.613
PcyM_0309500	45.9834	49.7683		50.4073	40.9174	59.5956	34.0312
PcyM_0309600	49.5295	60.3761		55.5039	60.7478	57.7272	27.5749
PcyM_0309700	18.6262	20.9994		16.9551	16.7322	14.2499	15.9114
PcyM_0309800	68.1467	69.7008		76.4198	87.4101	54.0817	64.1598
PcyM_0309900	8.67547	9.20452		4.90641	7.10043	9.87249	3.22893
PcyM_0310000	3.57962	7.00156		7.75747	9.32748	3.33098	16.5636
PcyM_0310100	31.8652	45.2742		45.7632	42.8807	16.7635	33.9858
PcyM_0310200	59.2291	76.7896		85.7676	88.1934	41.4993	87.3794
PcyM_0310300	74.661	69.2862		85.3803	77.2774	37.0176	66.0935
PcyM_0310400	24.6943	42.9758		46.0297	97.7695	105.511	29.968
PcyM_0310500	94.5013	110.584		95.579	90.4592	127.071	100.804
PcyM_0310600	26.6835	40.7566		31.0024	29.2391	30.0574	70.2071
PcyM_0310700	34.5847	39.4032		38.2793	33.7814	22.094	20.3138
PcyM_0310800	77.2376	86.6584		86.8449	69.7729	11.1274	63.276
PcyM_0310900	94.0221	102.869		92.3354	94.625	135.804	90.5728
PcyM_0311000	0	0		0	0.37996	0	0
PcyM_0311100	42.879	39.3977		56.9784	63.585	39.071	61.1273
PcyM_0311200	33.8689	35.4481		43.2809	42.8702	58.181	66.8747
PcyM_0311300	2.47031	2.53423		3.69969	3.68642	0.249333	8.05691
PcyM_0311400	66.5889	60.9118		64.4763	59.2632	50.107	75.5462
PcyM_0311500	19.3917	23.5755		19.5001	20.0307	44.8355	23.1619
PcyM_0311600	90.7341	89.0767		101.965	101.532	43.6296	60.3769
PcyM_0311700	92.2822	77.3353		81.98	78.7321	74.3131	105.128
PcyM_0311800	54.0561	56.6109		43.5188	38.3279	25.371	47.1382
PcyM_0311900	160.244	137.758		141.652	138.771	71.6568	130.1
PcyM_0312000	54.7487	57.0876		47.1365	49.6455	63.9606	26.54
PcyM_0312100	28.5851	23.4598		22.2899	25.9116	32.5234	7.17155
PcyM_0312200	55.5412	59.3111		64.2035	56.3424	12.7829	31.3022
PcyM_0312300	67.0438	74.3365		72.1893	80.6396	75.2737	134.017
PcyM_0312400	202.567	164.307		179.869	200.299	198.212	173.251
PcyM_0312500	25.7315	22.6485		29.7182	30.4371	26.7132	64.8742
PcyM_0312600	22.9386	15.3234		28.1221	30.9975	44.1809	92.607
PcyM_0312700	66.9287	70.3603		76.6726	73.0953	9.9266	46.29
PcyM_0312800	146.088	120.561		128.481	120.992	136.662	115.002
PcyM_0312900	102.486	85.507		94.1861	88.8079	129.747	65.7322
PcyM_0313000	175.416	162.739		146.271	167.916	216.109	206.095
PcyM_0313100	29.9641	36.2701		39.9624	23.5325	16.1561	21.2269
PcyM_0313200	21.9991	40.7244		48.9996	31.6455	8.24776	18.6648
PcyM_0313300	62.4672	63.1705		46.9421	53.4645	73.5436	67.3813
PcyM_0313400	8.22077	8.46789		13.0314	10.6347	1.068	35.5038
PcyM_0313500	28.7453	36.0895		36.5367	34.6212	26.0233	12.3211
PcyM_0313600	29.5252	49.8936		39.1854	44.2727	17.3807	29.2985
PcyM_0313700	71.169	77.93		77.8289	62.5262	12.3601	72.5885
PcyM_0313800	42.4612	45.2236		46.5733	36.273	13.6674	42.3067
PcyM_0313900	0	0		0	0	0	0
PcyM_0314000	0.0720587	0		0.300582	0.0619388	0.0378895	0
PcyM_0314100	10.8563	13.0175		10.2795	13.2552	15.2409	20.0562
PcyM_0314200	14.3657	21.3241		16.1681	13.9416	7.54794	12.9918
PcyM_0314300	8.34445	5.93376		6.89072	10.1883	8.2391	7.78233
PcyM_0314400	43.2542	52.4809		33.9596	31.5545	19.8266	28.6051
PcyM_0314500	38.1731	36.8059		37.5908	38.455	74.9713	65.6926
PcyM_0314600	49.4393	65.3508		64.3549	53.4256	20.541	56.7567
PcyM_0314700	53.1781	81.2243		71.6509	64.1548	13.1862	58.3981
PcyM_0314800	26.5619	39.8173		44.1058	43.0564	46.622	21.1742
PcyM_0314900	283.431	264.696		206.854	222.411	282.763	243.099
PcyM_0315000	32.1131	31.1504		31.8363	31.4135	30.0898	34.1139
PcyM_0315100	157.17	145.385		106.493	117.866	160.608	122.265
PcyM_0315200	40.1194	57.8034		43.4154	36.0539	6.14187	28.3525
PcyM_0315300	105.003	101.697		80.9243	71.4116	54.6205	97.9257
PcyM_0315400	55.7052	62.2131		48.7898	37.6298	25.7356	41.0622
PcyM_0315500	55.2236	59.695		62.2562	45.5776	7.79078	39.633
PcyM_0315600	793.947	753.525		654.668	683.409	774.716	379.87
PcyM_0315700	122.945	148.491		123.59	142.167	102.457	90.8285
PcyM_0315800	95.276	105.317		103.854	115.862	75.8136	100.226
PcyM_0315900	95.6201	106.15		90.441	94.6432	163.233	74.4805
PcyM_0316000	28.9153	27.0785		28.4401	21.9077	4.59659	19.82
PcyM_0316100	481.225	401.506		337.155	356.018	453.021	478.437
PcyM_0316200	96.9188	87.4969		79.5627	92.435	90.2653	127.861
PcyM_0316300	192.995	188.038		166.475	182.564	302.854	178.209
PcyM_0316400	53.5823	62.4568		68.6748	71.6943	46.0178	60.8223
PcyM_0316500	143.066	177.133		190.53	174.929	61.9089	184.606
PcyM_0316600	106.8	95.8183		95.403	107.584	172.026	88.3463
PcyM_0316700	103.471	104.506		81.2229	76.1569	23.8615	62.6239
PcyM_0316800	67.7134	73.7642		66.4904	74.5323	66.4319	110.676
PcyM_0316900	119.825	102.726		113.093	119.254	64.572	80.1658
PcyM_0317000	107.616	98.712		104.474	104.687	65.7679	54.3785
PcyM_0317100	1.35576	2.12351		1.81704	1.26737	1.84733	1.57846
PcyM_0317200	175.862	158.133		133.51	120.352	253.432	163.556
PcyM_0317300	16.5178	22.8709		15.7851	13.5956	15.3405	16.2825
PcyM_0317400	3.16372	3.08359		2.41162	1.31071	1.95031	0.942641
PcyM_0317500	15.9304	15.3387		12.2003	6.80767	11.5768	18.4347
PcyM_0317600	22.614	25.7592		17.8006	13.3483	11.8356	30.7722
PcyM_0317700	14.6118	19.9864		15.7495	11.7285	8.35715	28.1049
PcyM_0317800	26.0376	36.6593		30.7858	34.9773	39.5585	32.089
PcyM_0318000	13.7308	12.4872		11.2926	11.3276	2.77175	31.8416
PcyM_0318100	133.056	152.306		121.828	130.889	138.133	109.092
PcyM_0318200	231.941	215.569		195.821	220.655	375.789	235.442
PcyM_0318300	5.80829	11.0416		15.929	19.0251	1.59122	18.2151
PcyM_0318400	75.2138	67.2521		61.63	60.3396	54.5615	59.1497
PcyM_0318500	84.925	65.5256		60.9922	55.3868	63.6617	50.7614
PcyM_0318600	100.647	76.5414		85.8191	86.757	106.525	66.6167
PcyM_0318700	135.06	131.559		114.966	106.369	186.897	66.3162
PcyM_0318800	34.2496	33.4684		29.704	34.0179	62.057	29.8557
PcyM_0318900	36.9889	48.6675		34.414	34.5171	9.77336	23.0369
PcyM_0319000	0.092001	0.551812		1.06801	0.00236484	0.475043	0
PcyM_0319100	50.2916	34.9215		27.3669	27.9291	23.5819	21.2479
PcyM_0319200	56.3558	46.4468		41.2882	32.0141	32.2604	23.7532
PcyM_0319300	2.17181	2.29166		6.65311	6.09892	0.394568	19.6154
PcyM_0319400	11.9147	9.5543		15.8502	19.8997	15.9802	38.5534
PcyM_0319500	327.346	288.006		237.636	258.735	489.04	224.862
PcyM_0319600	257.046	228.907		199.08	207.425	469.363	311.074
PcyM_0319700	28.1394	26.0281		33.1624	24.4179	16.3251	20.8187
PcyM_0319800	101.862	99.3743		104.858	83.6999	8.96319	81.7393
PcyM_0319900	43.0254	59.2095		63.8447	37.0616	7.60845	42.5881
PcyM_0320000	123.208	150.99		135.795	148.131	261.135	136.418
PcyM_0320100	1153.36	954.096		735.265	839.38	2016.94	1006.6
PcyM_0320200	94.6844	86.9275		102.279	109.344	130.074	112.574
PcyM_0320300	61.6164	98.016		62.8045	56.4441	30.268	62.6804
PcyM_0320400	61.9123	63.1328		51.583	44.5514	62.247	57.5562
PcyM_0320500	39.71	44.2293		30.6602	36.2138	32.9547	21.0322
PcyM_0320600	21.3558	13.9838		22.0129	16.9152	11.7849	22.6089
PcyM_0320700	108.611	117.552		107.489	97.36	64.6117	98.1197
PcyM_0320800	181.565	202.726		171.793	210.696	330.806	272.79
PcyM_0320900	21.6947	31.6501		25.6231	20.9013	4.46246	15.1488
PcyM_0321000	0.340145	0		0	1.24591	1.85389	2.3361
PcyM_0321100	97.388	92.1092		91.82	80.6109	50.2371	84.5895
PcyM_0321200	84.1799	81.897		94.1076	80.7172	51.9981	78.6909
PcyM_0321300	135.262	125.828		145.486	151.66	159.071	139.754
PcyM_0321400	24.6807	35.2403		23.4776	21.4946	15.7026	32.6738
PcyM_0321500	615.886	606.742		487.073	523.988	840.215	304.009
PcyM_0321600	75.0555	85.7258		85.488	70.4473	34.738	28.2616
PcyM_0321700	57.7418	48.5471		48.2884	50.9218	19.543	25.4341
PcyM_0321800	137.239	139.506		134.73	139.077	257.614	194.677
PcyM_0321900	651.272	429.759		371.943	364.321	892.078	175.855
PcyM_0322000	36.9847	38.0777		45.3446	37.6613	28.3823	73.8178
PcyM_0322100	421.477	387.058		383.55	411.711	714.283	539.722
PcyM_0322200	128.824	149.391		155.523	160.389	238.655	256.49
PcyM_0322300	117.725	125.211		123.623	116.488	24.3287	101.363
PcyM_0322400	46.8352	65.3146		68.5669	73.2738	97.5182	94.2657
PcyM_0322500	23.2412	36.503		51.8947	44.9047	36.3096	23.2614
PcyM_0322600	59.2629	67.453		68.4819	56.2998	3.53609	33.0784
PcyM_0322700	70.4715	52.4579		58.9554	52.6689	35.5382	26.6167
PcyM_0322800	122.034	126.368		131.995	132.24	97.3644	107.536
PcyM_0322900	83.8925	93.4046		104.672	67.0093	44.226	91.7421
PcyM_0323000	278.052	335.019		281.429	296.143	602.775	299.207
PcyM_0323100	25.5403	32.6837		36.7247	34.1695	3.86674	58.3846
PcyM_0323200	28.1993	29.7735		40.8368	48.2025	84.7651	65.9882
PcyM_0323300	43.9279	54.3774		63.2942	67.6172	46.2477	62.6235
PcyM_0323400	14.9076	16.772		48.1048	37.6726	18.2645	63.5991
PcyM_0323500	19.5761	23.2475		45.4295	48.8862	17.4729	101.033
PcyM_0323600	8.15608	12.6262		16.4377	19.9166	5.65413	14.7813
PcyM_0323700	64.649	54.5945		61.8405	57.9728	6.55041	34.8938
PcyM_0323800	24.9019	30.4623		42.106	49.4817	18.6287	78.8287
PcyM_0323900	183.933	171.175		145.583	141.372	261.579	222.635
PcyM_0324000	177.342	178.634		140.909	143.043	263.896	233.882
PcyM_0324100	65.2359	74.9615		67.5264	63.1733	20.0161	68.6068
PcyM_0324200	26.8614	52.1774		38.0512	36.6557	10.1907	22.9805
PcyM_0324300	4.57323	8.04268		2.98872	7.07276	9.97022	2.06523
PcyM_0324400	27.4326	31.9038		31.48	27.3466	8.30633	13.4574
PcyM_0324500	30.5774	35.5719		31.0063	25.5859	17.1867	28.1497
PcyM_0324600	30.1804	27.5287		20.7987	23.8007	41.1161	28.3893
PcyM_0324700	48.5044	74.9156		52.0318	50.6236	10.7211	39.6649
PcyM_0324800	43.8543	40.3849		47.5958	34.4447	21.2117	28.0346
PcyM_0324900	30.9692	39.0188		36.8183	38.5883	38.9439	39.3993
PcyM_0325000	6.41053	8.45537		8.34614	6.35947	0.727904	4.52335
PcyM_0325100	89.8307	91.5845		77.4052	71.0925	48.9322	67.6699
PcyM_0325200	41.688	51.0877		55.9137	54.6388	27.0426	31.2668
PcyM_0325300	30.9021	48.6699		32.314	25.1218	31.8697	49.5283
PcyM_0325400	90.6565	94.0458		89.4046	86.458	76.291	89.3161
PcyM_0325500	3.26938	6.50272		4.46977	4.52169	0.588715	16.6597
PcyM_0325600	82.645	79.8861		78.8278	79.8421	53.0071	68.4036
PcyM_0325700	39.2042	39.592		39.9843	33.4718	16.9642	23.8642
PcyM_0325800	272.331	226.022		182.643	184.167	471.71	252.304
PcyM_0325900	66.0218	64.3814		63.9985	59.9469	36.9676	35.6756
PcyM_0326000	31.9468	47.506		173.211	230.421	302.749	41.7767
PcyM_0326100	1545.25	1765.28		1575.61	1293.84	1585.9	137.871
PcyM_0326200	199.703	280.369		227.154	169.218	421.796	26.873
PcyM_0326300	23.4308	27.2152		16.7693	13.5611	6.58894	13.4351
PcyM_0326400	39.352	9.45253		45.574	61.6218	187.017	50.0262
PcyM_0326500	31.6411	30.5876		28.7777	45.2714	77.6577	34.169
PcyM_0326600	1037.6	926.228		745.721	767.516	1372.29	462.226
PcyM_0326700	2.6907	0.405598		16.4854	14.5542	26.1878	39.0567
PcyM_0326800	3.28356	1.73238		7.24237	4.00912	7.15858	71.1759
PcyM_0326900	0.394707	0.639608		1.42218	0.481924	0.179273	35.0922
PcyM_0327000	8.70282	0.258678		13.073	14.8911	25.164	47.881
PcyM_0327100	5.60634	3.32759		4.2936	5.9895	11.4586	33.2295
PcyM_0327200	0.371649	0.294119		0.796956	0.907542	0.675201	15.5246
PcyM_0327300	1.2947	1.43446		1.58647	1.8179	1.05848	4.96975
PcyM_0327400	0.00811139	0.359478		0	0	0	0
PcyM_0327500	0	0		0	0	0	0
PcyM_0327600	0.810275	0.00483937		1.28694	3.24502	0.01285	0
PcyM_0327700	22.7712	26.1197		22.4488	18.0462	10.8873	33.2646
PcyM_0327800	23.9326	17.8904		21.4481	19.3945	23.0398	29.9183
PcyM_0327900	5.91035	3.40173		1.84349	2.0993	3.51417	7.76455
PcyM_0328000	0.265608	0		0.929901	0.555941	0.275743	14.3803
PcyM_0328100	1.12719	0.0258564		0	0	0	0
PcyM_0328200	0	0.130484		0	0.150984	0	0
PcyM_0328300	0	0.148981		0.173008	0	0	0
PcyM_0328400	0	0		0.0054826	0	0	0
PcyM_0328500	0.288576	1.1165		0.353609	0.254469	1.57283	0
PcyM_0328600	0.0181828	0		0	0.0251078	0	0.0458862
PcyM_0328700	0	0		0	3.42287	0	0
PcyM_0328800	0	0		0	0	0	0
PcyM_0328900	0.0387659	0.245431		0.0475021	0.0946636	0	0.787786
PcyM_0329000	0	0.00517778		0.04579	0	0	0
PcyM_0329100	0	0.682663		0.396379	1.18487	0	15.3385
PcyM_0329200	0.0967271	0		1.06673	0	0	4.14971
PcyM_0329300	0.705139	0		0	0	0.327415	0
PcyM_0329400	0.0248583	0		0.0220574	0	0.0243179	0
PcyM_0329500	0.159542	0		0.173775	0.10822	0.273749	0.840559
PcyM_0329600	2.09008	2.76661		1.32739	0.956966	0.949296	0
PcyM_0329700	0	0.0860305		0.0756856	0.0248639	0.110991	0
PcyM_0329800	0	0		0.287902	0	0.0118571	0
PcyM_0329900	0	0		0	0	0	0
PcyM_0330000	0.037298	0.0759361		0.883546	0	0.142158	0.0659093
PcyM_0330100	0.0347462	0		0	0	2.27253	0
PcyM_0330200	3.93774	0		4.81995	3.21268	10.5006	28.8655
PcyM_0330300	0.385012	0.00446438		0.539174	1.00733	2.71797	0.620957
PcyM_0330400	0	0		0.220083	0.112227	0.00767776	1.21664
PcyM_0330500	0.0272093	0.0215332		0	0.314578	0.0123583	0.0552207
PcyM_0330600	0	0.410597		0.018242	1.41778	0	0
PcyM_0330700	0	0		0	0	0	0
PcyM_0330800	0.0341427	0.0360268		0.0434461	0	0	0
PcyM_0330900	0	0		0.0139273	0.00748935	0	0
PcyM_0331000	0	0		0	0	0	0
PcyM_0331100	0.409364	0		0	0	0	0
PcyM_0331200	0	0.00500137		0	0	0	0
PcyM_0331300	0	0		0	0	0	0.0478113
PcyM_0331400	0	0		0	0	0	0
PcyM_0331500	0	0		0	0	0.0307385	0.0382031
PcyM_0331600	0	0		0	0.00759524	0.0226031	0
PcyM_0331700	0.0943896	0.012769		0.0889701	0.593118	0	0.0273241
PcyM_0331800	0.110437	0		0.00433735	0	0.0057655	0
PcyM_0331900	0	0		0	0.882793	0	0
PcyM_0332000	0	0.0883128		0.205111	0.204375	0.00760265	0.944889
PcyM_0332100	10.2394	11.8657		14.7315	13.7299	9.13525	33.4417
PcyM_0332200	18.6129	16.003		26.0174	19.0223	25.5494	61.9512
PcyM_0332300	0.00656969	0.131712		0.313959	0	0.00412321	0
PcyM_0332400	0.0412723	0.0435499		0.15172	0.151176	0	0
PcyM_0332500	0.000502598	0.268879		0.144112	0	0.534166	0.132777
PcyM_0332600	0.013648	0		0	0	0	0.0190337
PcyM_0332700	0	0		0	0.232325	0	0.0173994
PcyM_0332800	0	0		0	0	0	0
PcyM_0332900	4.72792	0		0	0.0597211	0	0.036435
PcyM_0333000	0.621073	0		0.0585413	0	0	0
PcyM_0333100	0	0		0	0.00817001	0.0243136	0
PcyM_0333200	0.154091	0		0	0	0.00848326	0.00527168
PcyM_0333300	0	0		0.00641708	0.332492	0	0
PcyM_0333400	0.00969847	0		0	0	0	0.00494487
PcyM_0333500	0	0		0	0	0	0
PcyM_0400100	0.117762	0		0.0967092	0.0884591	0.0198098	0.191102
PcyM_0400200	0.602737	0.411529		1.36852	1.21211	1.51372	4.20295
PcyM_0400300	0	0.226985		0	0	0.00542796	0
PcyM_0400400	19.1348	0.259688		12.5151	10.6673	29.0627	199.138
PcyM_0400500	0	0		0	0	0	0
PcyM_0400600	0	0		0	0	0	0
PcyM_0400700	0.00381994	0		0.0285528	0.00466401	0	0.00626358
PcyM_0400800	0.621232	0.280935		0.924353	0.650146	0.241851	0.400776
PcyM_0400900	0.227849	0		0	0	0	0
PcyM_0401000	0.13801	0.00260047		0	0.168506	0	0
PcyM_0401100	0.574811	0.82999		0.852633	0.960391	0.549631	0.956346
PcyM_0401200	0	0		0	0.370334	0	2.0546
PcyM_0401300	0.186234	0.0982556		0	0.113693	0	2.10254
PcyM_0401400	0.0840138	0.221625		0.463261	0.256445	0.305268	0
PcyM_0401500	8.10815	24.3658		37.9056	55.6324	87.5833	25.2728
PcyM_0401600	0.690691	0.624691		6.28712	5.18033	6.81191	12.6992
PcyM_0401700	1.36643	2.88368		11.0508	8.175	13.4055	53.3765
PcyM_0401800	0.51007	0.400879		1.00865	2.31931	1.2654	8.43533
PcyM_0401900	0.110152	0		0.639357	0.254826	0.758351	22.1588
PcyM_0402000	1.06617	0.803578		1.95966	2.13997	2.07535	6.5343
PcyM_0402100	24.1543	16.9811		35.6838	49.3717	51.1907	36.0106
PcyM_0402200	19.8342	5.19213		16.9891	21.1388	54.9619	34.1545
PcyM_0402300	14.5106	1.8252		16.7209	20.5329	88.6896	55.7645
PcyM_0402400	8.8987	3.88007		8.11048	15.7139	28.0582	31.2187
PcyM_0402500	82.7032	77.7881		79.0501	78.7782	55.0825	38.5398
PcyM_0402600	110.079	136.677		95.99	100.253	130.133	113.482
PcyM_0402700	50.3625	45.0854		39.1345	55.6823	100.3	67.1821
PcyM_0402800	23.1602	23.8635		22.2982	21.2084	33.5612	0
PcyM_0402900	61.7783	63.5163		59.5407	56.9334	56.2006	63.6626
PcyM_0403000	8.10997	6.33216		3.53984	10.6175	13.4937	0.229584
PcyM_0403100	13.6745	18.871		15.5707	14.3657	29.0711	7.43868
PcyM_0403200	165.493	179.158		136.506	129.43	235.632	165.611
PcyM_0403300	112.554	117.262		120.879	122.037	139.832	106.411
PcyM_0403400	20.486	44.3151		26.1498	20.2427	3.4601	29.8269
PcyM_0403500	90.8774	91.3091		65.6853	73.5532	147.009	47.2624
PcyM_0403600	61.0153	55.6862		51.8551	52.2862	44.3336	56.0124
PcyM_0403700	94.6588	118.685		88.6725	87.571	160.426	111.346
PcyM_0403800	34.0158	47.9571		37.5204	34.4545	31.1011	38.069
PcyM_0403900	11.4084	7.22277		9.08658	6.96462	11.3995	5.15193
PcyM_0404000	214.447	182.883		198.085	192.174	266.04	223.899
PcyM_0404100	39.874	33.3109		42.2619	39.919	10.2301	23.4422
PcyM_0404200	757.859	624.387		545.485	568.529	1086.62	494.774
PcyM_0404300	77.6475	64.049		58.996	64.4818	69.8665	53.5413
PcyM_0404400	67.3566	66.7109		63.6266	57.9471	65.3661	82.0265
PcyM_0404500	59.3604	59.0461		79.4389	100.03	83.3081	65.3041
PcyM_0404600	52.7355	65.1595		54.3665	47.519	79.6634	38.6732
PcyM_0404700	52.4836	64.8411		54.496	57.512	70.5899	48.86
PcyM_0404800	79.1649	71.9741		79.1492	74.7014	132.596	84.0241
PcyM_0404900	93.0783	101.678		87.2327	75.9607	57.4231	69.4369
PcyM_0405000	347.392	307.115		303.19	297.586	118.927	266.716
PcyM_0405100	22.9517	20.9126		21.1334	17.2729	8.62716	20.6998
PcyM_0405200	10.0422	15.9844		12.0272	12.3998	2.5769	12.8107
PcyM_0405300	63.6791	59.8124		80.1969	94.6253	29.5658	42.8286
PcyM_0405400	37.5741	53.6668		33.6859	33.8838	21.0661	45.6164
PcyM_0405500	21.437	29.1598		19.2632	19.7758	30.2914	21.5128
PcyM_0405600	47.1933	67.6627		64.3489	69.1188	68.5492	34.7774
PcyM_0405700	41.1327	57.2758		63.9437	44.5313	7.07783	33.5954
PcyM_0405800	96.6369	80.6127		86.6522	91.7342	105.78	79.002
PcyM_0405900	84.7988	69.9816		68.9617	73.1765	23.2125	67.4702
PcyM_0406000	38.63	44.1652		25.9688	26.8583	76.0303	24.2291
PcyM_0406100	54.0401	60.5609		58.9392	53.6389	51.3522	53.2217
PcyM_0406200	66.1309	70.9865		62.3538	53.4468	14.3895	70.7609
PcyM_0406300	19.1544	16.9787		17.4604	14.604	18.2373	18.9335
PcyM_0406400	32.7915	29.9432		40.6964	52.0998	76.3777	62.4609
PcyM_0406500	31.6129	27.9855		42.51	49.6157	22.7629	33.8662
PcyM_0406600	91.7089	76.8032		93.1171	82.9696	12.0824	74.8572
PcyM_0406700	76.9922	70.4309		87.3649	101.787	53.1377	64.2759
PcyM_0406800	66.1699	47.8454		51.3083	50.6572	33.716	58.7514
PcyM_0406900	57.2713	63.9006		61.7904	63.1386	23.2499	63.3768
PcyM_0407000	17.3939	23.3335		27.2618	26.6702	18.3725	33.1857
PcyM_0407100	0.92182	0.477813		1.10974	1.10576	4.93606	0
PcyM_0407200	17.2765	16.7455		29.4551	24.2205	42.1875	8.43134
PcyM_0407300	198.688	159.25		175.829	157.201	181.192	251.566
PcyM_0407400	24.6463	44.0823		77.4512	84.1386	18.2674	66.9639
PcyM_0407500	22.4518	40.8506		28.5381	27.8221	87.6677	31.4008
PcyM_0407600	50.3614	48.1067		46.9567	46.8471	11.134	30.0632
PcyM_0407700	77.6785	119.042		97.6284	91.3628	171.587	56.3573
PcyM_0407800	25.2179	33.5989		53.7923	64.0632	69.6317	60.3483
PcyM_0407900	11.8486	21.7636		21.115	24.6114	1.32878	24.6399
PcyM_0408000	59.3674	68.1835		56.5959	50.5487	40.9226	68.6662
PcyM_0408100	128.91	136.969		108.939	109.337	92.1794	153.571
PcyM_0408200	33.358	34.3389		42.0215	34.1044	17.4327	34.1062
PcyM_0408300	84.7816	89.5764		75.0421	80.5807	144.747	77.1203
PcyM_0408400	0.819892	0.865137		2.26049	1.75185	1.86194	0
PcyM_0408500	67.5811	74.1405		64.5945	63.0487	32.9029	41.2959
PcyM_0408600	296.222	259.155		231.099	225.756	289.161	251.572
PcyM_0408700	54.8942	54.9045		55.0569	49.8789	9.0868	29.9095
PcyM_0408800	40.8147	44.5064		49.0096	45.8526	42.6268	71.4593
PcyM_0408900	75.9859	68.2992		62.5968	68.6459	56.3674	67.267
PcyM_0409000	35.049	46.2762		40.0396	33.5523	4.06238	60.6344
PcyM_0409100	16.8069	24.3848		18.0202	17.6349	14.79	72.3408
PcyM_0409200	5.48275	7.04299		7.30614	5.82108	2.16541	9.68855
PcyM_0409300	21.5619	32.7709		20.3611	21.4958	35.5791	40.6707
PcyM_0409400	71.8572	68.1723		69.688	67.3778	81.9576	83.8668
PcyM_0409500	104.659	102.967		117.42	114.286	171.523	155.093
PcyM_0409600	180.917	178.627		157.55	175.994	269.515	172.533
PcyM_0409700	192.444	186.782		160.241	190.059	313.835	200.721
PcyM_0409800	114.658	126.566		113.45	124.807	186.278	86.5155
PcyM_0409900	118.992	114.897		98.3141	99.5269	177.959	99.946
PcyM_0410000	71.0508	69.9125		73.7504	74.6773	34.6161	50.3875
PcyM_0410100	25.9419	34.8817		22.3425	25.1583	50.9009	20.4178
PcyM_0410200	33.7768	31.2072		34.8253	30.9251	11.4809	39.2207
PcyM_0410300	114.518	115.104		109.046	99.2753	59.8983	108.596
PcyM_0410400	68.3049	66.8965		53.1644	63.8266	72.626	34.7164
PcyM_0410500	29.4402	58.9446		33.2893	26.7089	35.2828	36.8557
PcyM_0410600	60.3345	74.9139		52.4304	42.993	36.7288	66.6165
PcyM_0410700	142.016	115.382		97.7935	120.997	177.209	160.183
PcyM_0410800	193.79	206.274		195.003	159.012	180.056	206.665
PcyM_0410900	30.8924	40.7597		39.2059	36.1147	2.45379	27.3115
PcyM_0411000	68.0611	62.6597		74.1918	69.9176	36.1308	61.3104
PcyM_0411100	46.5038	127.53		121.71	103.861	55.977	111.248
PcyM_0411200	38.2182	52.8746		54.255	45.8863	20.2482	30.3172
PcyM_0411300	53.463	52.141		53.5483	56.6872	30.9153	51.7117
PcyM_0411400	70.0518	66.0147		58.566	66.7896	104.863	100.928
PcyM_0411500	65.2965	78.8126		58.0218	60.0736	67.0762	60.1694
PcyM_0411600	28.6972	49.522		45.8033	52.0322	22.8253	57.3394
PcyM_0411700	197.996	174.68		148.193	152.025	268.393	160.907
PcyM_0411800	59.1978	58.9873		59.1386	61.8844	93.3239	44.319
PcyM_0411900	83.4585	74.8568		89.0246	96.6431	151.573	85.4992
PcyM_0412000	29.9187	23.4688		19.529	19.2444	16.81	27.9441
PcyM_0412200	229.145	161.088		186.035	192.643	342.299	180.717
PcyM_0412300	40.6795	36.4277		49.3081	28.1901	3.99488	13.902
PcyM_0412400	74.4532	58.5889		57.7162	51.9123	17.1423	39.5913
PcyM_0412500	53.7763	52.9342		75.3791	91.7674	76.9583	53.1628
PcyM_0412600	18.4779	37.2368		49.4598	140.361	165.596	38.7958
PcyM_0412700	32.8075	25.6577		26.3781	20.3559	8.25726	20.2917
PcyM_0412800	132.215	136.91		111.293	116.628	229.538	142.913
PcyM_0412900	38.7193	31.236		39.2347	45.2632	26.0423	32.6145
PcyM_0413000	40.5125	52.1416		38.2703	41.4693	52.9806	63.4347
PcyM_0413100	111.055	110.708		95.5655	108.34	127.242	17.9563
PcyM_0413200	402.682	320.202		341.539	384.943	779.304	361.034
PcyM_0413300	34.0353	48.7757		35.497	41.7014	55.9865	3.36472
PcyM_0413400	43.5439	37.5045		41.355	41.2067	41.0687	44.3033
PcyM_0413500	37.5506	28.4233		48.2659	54.4309	43.9413	39.0983
PcyM_0413600	7.65121	9.79519		10.9335	11.4477	16.7081	17.467
PcyM_0413700	0.337479	0.356102		0.827064	0.961449	1.83936	1.01602
PcyM_0413800	249.019	226.627		192.395	196.223	231.955	180.985
PcyM_0413900	116.464	106.923		101.708	95.9886	102.863	119.309
PcyM_0414000	44.8037	50.7658		43.517	36.6294	49.0677	30.225
PcyM_0414100	52.5786	51.7968		48.3517	53.1712	41.5425	82.0183
PcyM_0414200	11.9416	17.0717		19.3529	15.5209	26.594	11.3073
PcyM_0414300	2.80218	3.02702		3.96201	3.57171	3.10944	7.40198
PcyM_0414400	3.95514	3.49106		3.92508	4.0579	1.28461	9.57571
PcyM_0414500	41.8621	35.0842		46.3874	46.3434	59.6786	15.1538
PcyM_0414600	30.0634	26.9241		26.9442	27.1442	42.6848	11.4087
PcyM_0414700	342.727	258.481		264.707	289.529	533.959	405.581
PcyM_0414800	70.1602	72.1455		71.1708	76.9318	31.7672	45.0937
PcyM_0414900	300.771	278.088		201.58	180.934	345.851	245.149
PcyM_0415000	847.185	757.255		523.75	534.939	894.37	730.998
PcyM_0415100	86.3017	88.1359		78.1192	70.893	106.666	52.7346
PcyM_0415200	55.0989	76.7477		49.9538	43.0022	9.37293	47.304
PcyM_0415300	55.5641	52.2294		47.1309	42.2658	33.132	33.0021
PcyM_0415400	169.346	155.719		137.589	145.049	111.52	159.182
PcyM_0415500	33.8348	41.4926		42.2019	45.6374	62.0195	66.4453
PcyM_0415600	18.1462	27.7798		27.4753	38.4467	29.7687	45.7604
PcyM_0415700	58.3379	57.7755		64.1655	76.3336	86.0914	79.1246
PcyM_0415800	0.185927	0.78475		0.227827	0.227011	0	0
PcyM_0415900	38.4285	46.123		46.846	54.6593	35.9875	63.5121
PcyM_0416000	6.98964	23.5713		36.054	64.334	10.3071	20.0628
PcyM_0416100	0.550639	2.09169		1.76656	1.32017	0.327398	0
PcyM_0416200	25.4799	32.3868		34.8334	30.8708	2.12625	15.9069
PcyM_0416300	100.353	81.9281		189.415	216.792	98.302	59.5999
PcyM_0416400	1212.01	905.616		1077.38	1112.96	213.08	492.984
PcyM_0416500	1019.91	798.716		935.312	942.603	267.833	473.43
PcyM_0416600	239.209	193.872		489.066	563.878	304.306	190.892
PcyM_0416700	174.631	151.932		336.146	389.072	68.9391	136.586
PcyM_0416800	12.8079	21.2662		54.2458	57.2059	1.58765	31.3245
PcyM_0416900	4.23812	6.9875		14.2813	19.0813	2.88739	11.969
PcyM_0417000	28.3884	34.6231		110.363	121.424	38.437	16.1936
PcyM_0417100	19.6258	22.3782		80.7051	91.4197	24.2135	14.0055
PcyM_0417200	32.4219	44.2384		118.683	133.976	18.4822	10.1514
PcyM_0417300	15.7587	13.8569		32.1833	29.1469	10.7716	24.1326
PcyM_0417400	41.3597	47.5222		54.7078	57.5512	55.2769	22.0429
PcyM_0417500	15.0825	16.2463		29.9105	33.889	32.3488	53.2118
PcyM_0417600	49.3545	54.575		57.5773	53.106	15.149	39.4367
PcyM_0417700	71.5619	86.807		106.843	122.892	83.5643	65.8359
PcyM_0417800	19.0951	21.6426		25.0232	28.0636	8.77991	6.38753
PcyM_0417900	25.5738	43.699		82.3861	90.5864	67.7761	22.5258
PcyM_0418000	69.2132	63.9283		69.5039	68.5239	55.7924	66.3513
PcyM_0418100	4.00123	6.00086		8.36236	7.63802	3.0996	0
PcyM_0418200	114.022	98.6047		86.2056	94.4862	185.693	116.291
PcyM_0418300	29.2725	39.3165		33.5696	30.4694	64.5691	16.8011
PcyM_0418400	18.7825	23.8802		22.6655	23.5717	15.1775	19.7226
PcyM_0418500	26.6568	22.4869		21.9102	22.656	13.3918	20.8873
PcyM_0418600	37.7333	37.6112		31.6087	27.987	16.538	28.8501
PcyM_0418700	17.6686	26.6545		42.2317	57.1117	33.2289	28.8687
PcyM_0418800	62.7251	59.0963		51.9363	58.4354	132.787	74.7157
PcyM_0418900	52.9133	70.2432		62.9496	57.9339	22.514	70.0274
PcyM_0419000	190.671	164.731		179.806	188.341	159.254	176.819
PcyM_0419100	154.81	150.956		176.487	220.892	305.572	157.546
PcyM_0419200	93.0807	90.3775		93.6895	112.427	182.926	103.417
PcyM_0419300	35.5829	37.4137		43.1006	35.8012	5.60151	43.298
PcyM_0419400	194.543	177.477		173.755	187.02	261.333	180.678
PcyM_0419500	12.1744	14.3143		17.4753	16.1386	4.4236	54.5857
PcyM_0419600	0.929328	3.26871		4.93463	5.29516	0.562792	23.0822
PcyM_0419700	0.442334	0.513418		0.788447	0.621514	0.281267	0.0998772
PcyM_0419800	7.65241	7.90011		7.35098	7.37365	5.18532	8.9663
PcyM_0419900	30.0142	53.0151		47.3449	43.2034	9.21464	22.3657
PcyM_0420000	77.123	76.2583		107.196	83.153	61.4093	85.6924
PcyM_0420100	58.1508	60.0612		66.705	72.6214	81.846	39.5991
PcyM_0420200	34.8223	48.5559		49.0806	36.575	3.79252	40.4773
PcyM_0420300	29.85	36.5795		37.4877	38.8417	19.0131	18.9311
PcyM_0420400	0	0		0.781095	0	0	0.0224894
PcyM_0420500	7.68675	8.8887		8.13026	13.1136	8.9912	15.4543
PcyM_0420600	27.3535	24.9305		17.9602	25.8073	59.2953	22.4593
PcyM_0420700	134.181	137.472		122.992	150.036	279.053	168.69
PcyM_0420800	45.1631	46.789		44.6322	49.4613	108.904	38.3184
PcyM_0420900	11.8389	18.6604		24.2162	20.6105	6.18159	12.4625
PcyM_0421000	24.1635	18.2197		19.5543	20.7135	9.96887	36.0325
PcyM_0421100	79.9265	79.2379		69.6751	70.5254	88.8689	77.9734
PcyM_0421200	27.7834	32.0096		30.9884	33.1435	22.5509	30.7775
PcyM_0421300	48.5924	63.9188		51.475	44.6983	41.3893	42.2228
PcyM_0421400	8.91236	13.551		16.124	16.2288	10.9131	57.0594
PcyM_0421500	0	0		0.0362159	0	0	0
PcyM_0421600	95.4754	99.9762		92.1825	107.12	126.577	77.5369
PcyM_0421700	98.0905	93.7187		96.5109	100.539	202.385	107.683
PcyM_0421800	70.766	67.509		83.358	81.7879	16.8491	82.3213
PcyM_0421900	13.9149	21.6832		18.356	18.8928	18.0277	35.8832
PcyM_0422000	29.4602	48.8923		33.9901	42.654	43.8843	35.1078
PcyM_0422100	74.7374	58.155		66.9316	71.4173	103.197	82.8403
PcyM_0422200	109.207	105.992		120.039	137.941	211.094	106.144
PcyM_0422300	27.1672	26.7136		28.8751	30.3684	39.9425	41.4521
PcyM_0422400	8.47053	18.0162		15.3713	11.664	4.17504	7.67617
PcyM_0422500	181.446	61.5876		247.041	331.416	1328.54	339.272
PcyM_0422600	4.76375	2.6456		21.3522	20.2042	29.1524	58.5937
PcyM_0422700	1.73186	4.41629		8.017	3.53011	3.49599	41.2337
PcyM_0422800	0	0		0	0	0	0
PcyM_0422900	7.23226	0		31.9006	34.4787	80.4609	93.6378
PcyM_0423000	5.90593	2.70983		8.70127	9.92647	44.4471	33.8011
PcyM_0423100	21.4863	1.79581		19.616	22.8587	99.4735	52.3581
PcyM_0423200	1.0663	1.57409		3.34891	5.77793	8.21283	2.60027
PcyM_0423300	346.41	8.48954		370.253	393.025	2206.22	1984.97
PcyM_0423400	1.74369	3.03586		4.56327	3.98932	4.45767	2.78415
PcyM_0423500	15.0809	19.9637		39.9822	38.2023	84.4688	30.6081
PcyM_0423600	1.10422	0.116516		2.57082	3.10089	5.01529	25.9301
PcyM_0423700	1.98772	1.39827		2.66763	4.04489	7.6237	22.2272
PcyM_0423800	0	0		0	0.0102583	0	0
PcyM_0423900	6.68549	8.09184		17.728	18.7263	18.9335	1.77595
PcyM_0424000	3.89825	9.35679		15.4326	13.782	39.951	6.8998
PcyM_0424100	0.719293	1.26498		4.40696	5.19621	3.92037	4.06033
PcyM_0424200	0.00136011	0		0.449987	0.448374	0	0.552792
PcyM_0424300	0.269309	1.70503		1.32	0	0	0
PcyM_0424400	0.591659	0.650323		1.08749	0.421398	0.0895758	0
PcyM_0424500	0.759826	0.572683		0.997562	0.993987	0.595227	0
PcyM_0424600	21.2069	23.5808		18.9113	16.2225	10.4571	25.9747
PcyM_0424700	21.4407	8.85285		11.4375	9.29523	11.2907	8.41953
PcyM_0424800	0.321894	0.339657		0.262956	0.43669	0	0
PcyM_0424900	0	0		0.449876	1.34479	0	0
PcyM_0425000	0	0.219491		0.637224	1.39687	0	0.00978506
PcyM_0425100	0	0.0152078		0	0.020949	0	0
PcyM_0425200	0	0		0.179512	0	0	0
PcyM_0425300	0.0714474	0.263866		0.15321	0	0.0757187	0
PcyM_0425400	0	0.341793		0	0	0.0294242	0
PcyM_0425500	0.386511	0.111229		0.559725	0.644666	0.127673	3.09421
PcyM_0425600	0	0		0	0	0	0.0189297
PcyM_0500100	0	0		0.00994137	0	1.79085	0
PcyM_0500200	0	0		0.212345	0	0	0
PcyM_0500300	0	0		0	0.511435	0	0
PcyM_0500400	0.0396007	0.167144		0	0	0.579673	0
PcyM_0500500	0	0		0.00586225	0	0	0
PcyM_0500600	0	0		0	0	0	0
PcyM_0500700	0	0.050613		0	0	0	0
PcyM_0500800	0	0		0	0.138646	0.0038925	0
PcyM_0500900	0.148369	0.0208742		0.303008	0.221409	0.152433	0.55835
PcyM_0501000	0	0		0.252643	0	0	0
PcyM_0501100	0.0997723	0.263196		0.0305642	0.243637	0.498474	0
PcyM_0501200	0.27632	0.606804		0.826324	0.857501	0.125503	14.1162
PcyM_0501300	0	0		0	0	0	1.05367
PcyM_0501400	0.271488	0.9549		1.27523	1.54689	2.21954	0
PcyM_0501500	0.153446	0.161914		0.219365	0.0624509	0.511091	0.00390129
PcyM_0501600	0.0540482	0.0285154		0.0662284	0.527928	0	0
PcyM_0501700	0.0854715	0		0.366566	0.417431	0.232923	1.35094
PcyM_0501800	0.148525	0.0783608		0	0	0.539672	0.670727
PcyM_0501900	12.6553	0		7.92593	5.37947	23.673	30.9035
PcyM_0502000	0.912538	1.37557		3.07501	3.10378	1.18419	3.09071
PcyM_0502100	8.66516	2.95814		21.5481	20.8486	36.1154	80.5641
PcyM_0502200	3.38995	3.06602		6.40887	10.8797	37.8323	10.2787
PcyM_0502300	5.27834	0.92827		36.5516	24.9194	48.2673	178.575
PcyM_0502400	18.4268	1.90858		19.1164	20.7042	98.5835	94.4454
PcyM_0502500	29.2418	17.627		52.2529	99.0353	187.52	57.7995
PcyM_0502600	8.59172	7.07713		15.8636	36.9934	67.0268	5.10674
PcyM_0502700	17.3326	4.11576		20.7337	32.2636	78.1494	64.1313
PcyM_0502800	0.101288	0.748145		0.620572	1.2367	0.73607	2.05834
PcyM_0502900	35.1205	52.1023		57.6372	60.8294	101.788	83.3043
PcyM_0503000	767.573	1026.39		793.688	670.274	2011.93	330.247
PcyM_0503100	991.839	1144.13		938.609	824.415	2689.36	365.786
PcyM_0503200	151.235	172.711		142.286	119.614	502.931	29.9966
PcyM_0503300	1.97332	0.416442		0	0.96374	2.15104	0
PcyM_0503400	332.116	417.159		353.255	274.076	431.857	37.4766
PcyM_0503500	14.1273	12.2021		12.1712	8.46442	51.5967	2.30198
PcyM_0503600	70.8872	81.1387		91.9997	91.406	115.593	142.105
PcyM_0503700	11.241	15.4053		28.2204	23.5283	32.3795	43.6506
PcyM_0503800	72.6885	60.6169		51.9101	54.224	48.9652	36.695
PcyM_0503900	209.231	198.388		189.575	183.577	299.198	159.911
PcyM_0504000	10.7419	18.1804		11.4685	17.5306	28.6139	10.0861
PcyM_0504100	150.233	142.738		123.363	124.014	164.225	145.635
PcyM_0504200	15.8455	26.7985		20.2704	14.1683	5.97945	9.57669
PcyM_0504300	29.4716	37.3567		63.8228	98.8989	114.916	51.4787
PcyM_0504400	19.9973	32.8616		52.8598	85.1562	66.6251	54.4409
PcyM_0504500	9.34313	16.5892		18.6041	18.4277	22.034	42.5985
PcyM_0504600	9.45282	17.0717		22.6093	39.8406	15.192	14.3662
PcyM_0504700	79.8499	66.8961		69.5837	77.1433	123.473	97.4424
PcyM_0504800	98.329	94.2688		92.8416	93.3664	134.538	92.8613
PcyM_0504900	121.338	128.168		126.147	143.97	58.1994	112.054
PcyM_0505000	36.8857	40.6814		39.459	32.69	40.9442	39.0962
PcyM_0505100	35.1468	33.6588		29.7004	27.0089	24.047	37.8015
PcyM_0505200	19.7211	21.1263		19.7494	21.512	20.7334	42.043
PcyM_0505300	981.459	987.282		756.325	851.857	1331.86	878.926
PcyM_0505400	28.1115	43.5627		37.869	33.6046	26.5567	37.0168
PcyM_0505500	17.7619	21.2239		35.4794	27.8288	31.9745	28.019
PcyM_0505600	34.856	57.8825		48.3125	34.0862	48.495	39.2595
PcyM_0505700	29.1204	46.4009		32.5694	31.7903	15.2491	42.8221
PcyM_0505800	6.61535	2.57885		2.27906	1.50541	4.36517	0.0376751
PcyM_0505900	35.9122	58.2455		45.9843	39.1496	31.5865	28.102
PcyM_0506000	17.446	16.0625		14.8866	15.6624	22.3731	30.1235
PcyM_0506100	46.8891	58.2229		41.651	45.8132	19.6867	54.9606
PcyM_0506200	10.8241	12.3045		13.0798	19.0692	5.17139	37.3794
PcyM_0506300	26.6288	41.307		34.7449	21.1533	9.41867	28.4287
PcyM_0506400	69.4745	81.4048		68.8379	53.9419	20.8067	70.9012
PcyM_0506500	18.4522	21.3326		27.501	22.849	14.0262	27.6257
PcyM_0506600	6.43989	3.02012		2.63674	4.36827	2.59996	4.847
PcyM_0506700	25.05	47.1084		31.6502	22.2956	100.53	17.3456
PcyM_0506800	170.829	157.699		167.608	179.341	252.375	139.538
PcyM_0506900	92.9976	84.0261		89.8465	77.0082	21.0825	63.6737
PcyM_0507000	62.9407	46.4374		50.0148	56.4825	106.493	50.8435
PcyM_0507100	63.8121	71.4867		66.5827	72.8023	92.0855	82.5182
PcyM_0507200	48.6902	45.702		44.8655	49.4077	20.9386	64.7692
PcyM_0507300	41.0467	65.3501		28.931	25.5676	31.6824	43.8541
PcyM_0507400	21.0086	28.9214		27.8458	27.1098	20.0994	21.8469
PcyM_0507500	31.6153	33.8886		36.8043	35.664	9.90935	22.93
PcyM_0507600	16.3226	19.6785		23.4868	26.0908	9.41153	34.5063
PcyM_0507700	1.61977	1.3984		2.62235	1.97769	2.40771	0.664979
PcyM_0507800	80.0151	63.8756		71.7912	75.9642	148.567	54.7594
PcyM_0507900	117.56	150.004		111.387	94.8556	53.0726	133.782
PcyM_0508000	142.431	129.773		132.063	125.296	215.484	124.685
PcyM_0508100	131.23	154.184		133.706	134.557	255.745	129.021
PcyM_0508200	38.8847	46.2661		60.9865	67.7534	102.103	51.6739
PcyM_0508300	55.9547	49.8341		51.3919	62.9285	66.7764	106.638
PcyM_0508400	35.7914	45.5454		38.8409	35.8056	19.0856	37.6079
PcyM_0508500	75.428	71.685		60.398	68.1432	31.8025	61.1889
PcyM_0508600	105.707	142.127		112.872	110.157	59.1488	116.97
PcyM_0508700	95.6726	76.6842		92.1399	116.945	108.667	109.22
PcyM_0508800	47.9962	41.2555		42.4739	52.551	47.1556	40.0605
PcyM_0508900	95.004	93.3309		74.4776	79.1932	41.114	142.963
PcyM_0509000	76.3337	76.0094		58.3845	60.9864	31.757	88.4868
PcyM_0509100	166.877	147.241		146.775	147.499	50.7972	123.602
PcyM_0509200	47.5416	62.9123		59.6892	43.727	12.65	43.9145
PcyM_0509300	125.205	107.36		104.618	101.986	66.1096	98.5207
PcyM_0509400	51.2701	54.5926		51.3614	50.0049	47.0766	58.0179
PcyM_0509500	1.9382	4.61809		7.89107	3.74055	0.113589	3.38815
PcyM_0509600	23.4734	26.4055		34.3386	31.1853	28.5557	10.5167
PcyM_0509700	113.295	106.801		95.9797	103.632	143.127	90.6953
PcyM_0509800	316.423	234.071		251.03	262.024	606.014	367.846
PcyM_0509900	70.47	65.646		61.8231	66.156	65.8172	73.2349
PcyM_0510000	21.7969	24.4494		26.2084	27.2933	19.1591	53.6601
PcyM_0510100	34.782	31.8005		31.6059	30.428	35.5366	48.0923
PcyM_0510200	29.0681	31.2615		27.6999	33.5753	18.8434	24.7405
PcyM_0510300	71.5017	104.107		93.5114	76.992	15.8501	77.7575
PcyM_0510400	70.8273	56.5979		73.5554	97.0264	96.1398	54.0535
PcyM_0510500	59.4473	47.3944		63.3115	90.3257	98.1352	44.4117
PcyM_0510600	153.714	141.279		129.747	147.083	192.655	153.38
PcyM_0510700	25.9673	36.5267		32.8021	29.2962	14.3376	27.584
PcyM_0510800	12.0928	35.7485		62.8574	90.5864	18.0518	13.3802
PcyM_0510900	239.576	239.847		210.395	202.237	139.172	218.028
PcyM_0511000	30.9442	33.7469		41.1546	38.1274	35.3937	46.1189
PcyM_0511100	190.382	179.208		217.428	244.688	143.681	116.27
PcyM_0511200	17.32	18.9363		21.7345	24.714	37.5545	81.0425
PcyM_0511300	7.93054	9.49389		5.292	8.78838	5.23077	21.1283
PcyM_0511400	26.4863	34.5831		40.8901	58.1634	19.7325	56.7932
PcyM_0511500	33.6598	37.2932		30.1652	35.0909	44.6881	28.6471
PcyM_0511600	45.6274	43.0775		49.2431	41.5488	13.4797	40.4426
PcyM_0511700	20.2806	27.829		20.6914	28.0565	53.1331	21.6189
PcyM_0511800	88.2201	95.2468		86.4521	92.9227	71.4793	139.13
PcyM_0511900	219.025	218.35		181.906	185.434	405.547	198.211
PcyM_0512000	195.122	213.579		196.748	231.922	424.963	125.272
PcyM_0512100	681.467	535.747		433.803	478.825	779.145	535.281
PcyM_0512200	37.4088	40.4369		39.1015	32.2738	24.8555	12.8223
PcyM_0512300	67.0482	67.9387		52.8827	55.603	77.2706	87.6028
PcyM_0512400	43.4844	53.9017		50.4796	68.4061	83.8289	22.3244
PcyM_0512500	1.04446	3.82436		2.85501	1.89652	3.76264	0
PcyM_0512600	38.2297	37.7368		42.6474	37.3268	1.90855	18.6668
PcyM_0512700	60.4538	54.1759		64.92	60.9899	41.0856	44.1625
PcyM_0512800	108.96	112.594		113.191	110.491	111.48	92.4929
PcyM_0512900	36.3547	42.6403		55.4091	45.2428	11.383	35.9167
PcyM_0513000	391.827	334.539		337.028	419.399	468.927	331.526
[truncated: 5,179 more rows]
