# Supplementary figures and images for: Transcriptomic analysis reveals reduced transcriptional activity in the malaria parasite Plasmodium cynomolgi during progression into dormancy
Source: eLife journal article supplement (doi:10.7554/elife.41081), 2018-12-27

Figure 1 - Figure supplement 1

A.

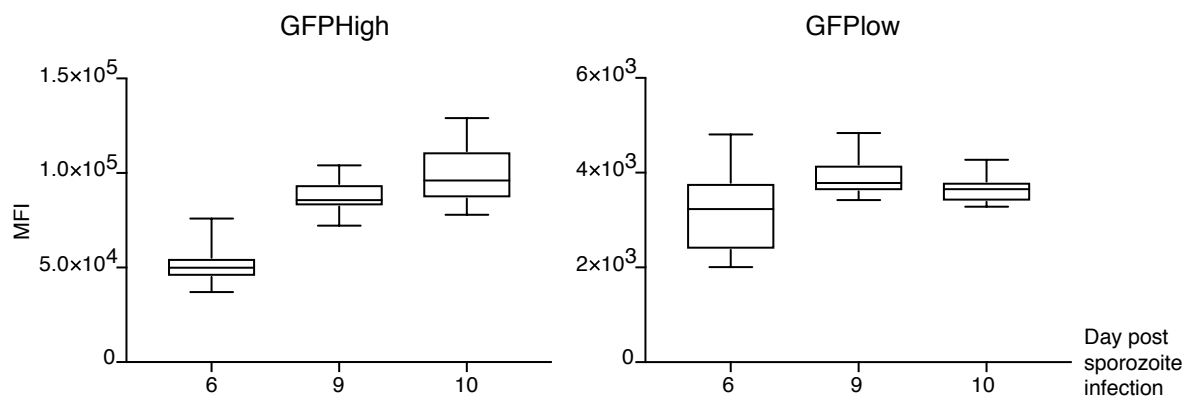

B.

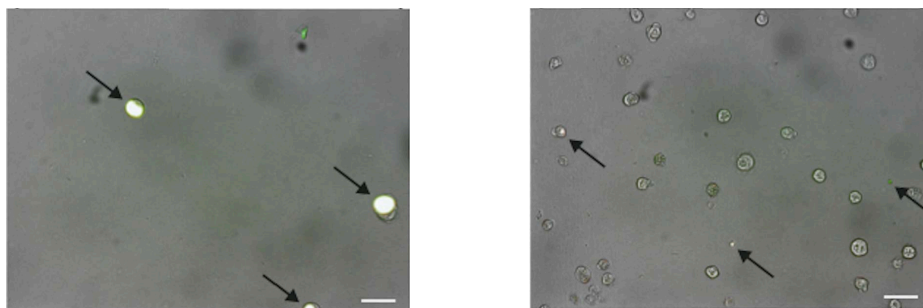

Supplement: supp [file elife-41081-supp-v1.zip]

Figure 1- Figure supplement 2

A.

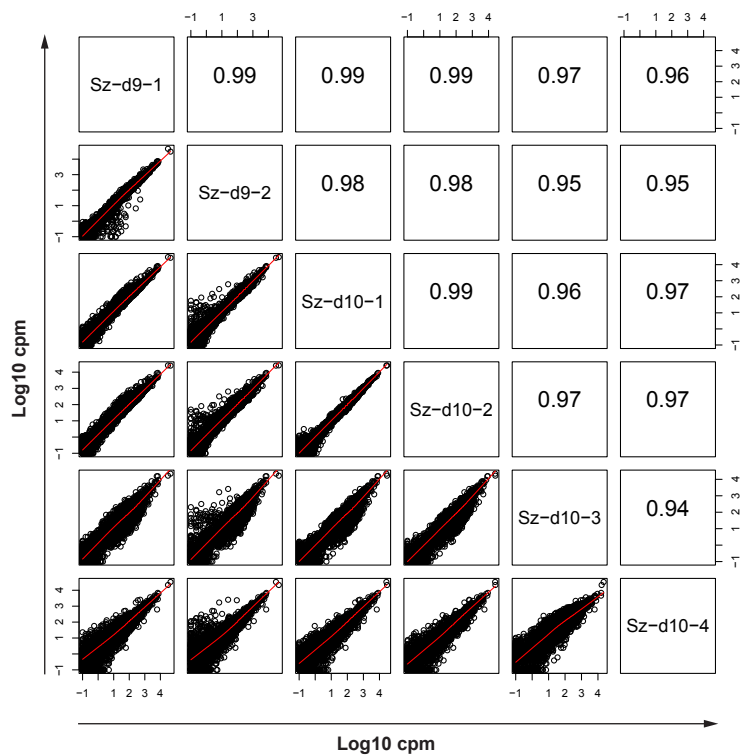

B.

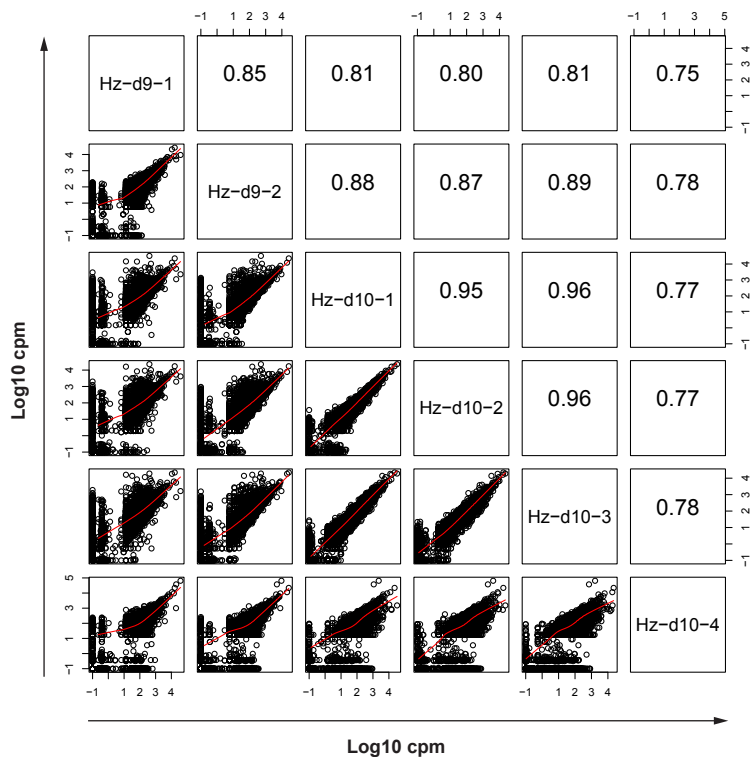

Supplement: supp [file elife-41081-supp-v1.zip]

Figure 2 -Figure Supplement 1

A.

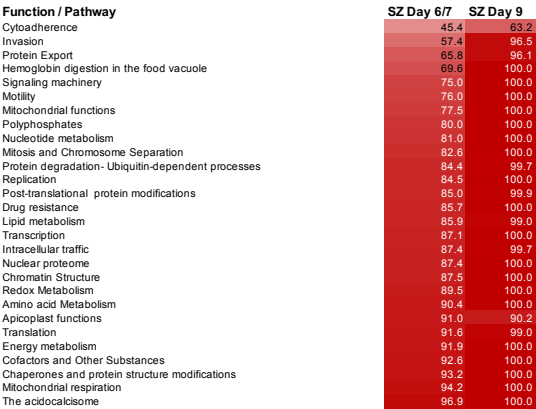

100 % 0 %

B.

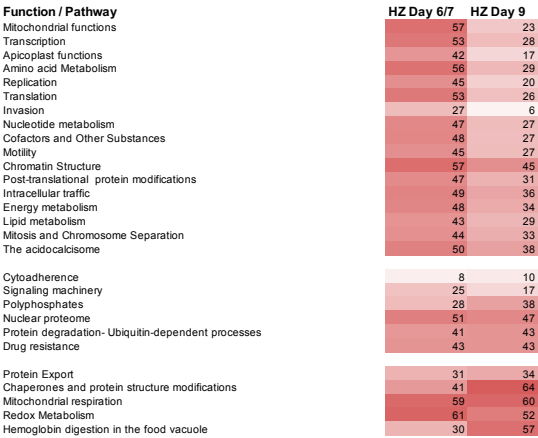

100 % 0 %

C.

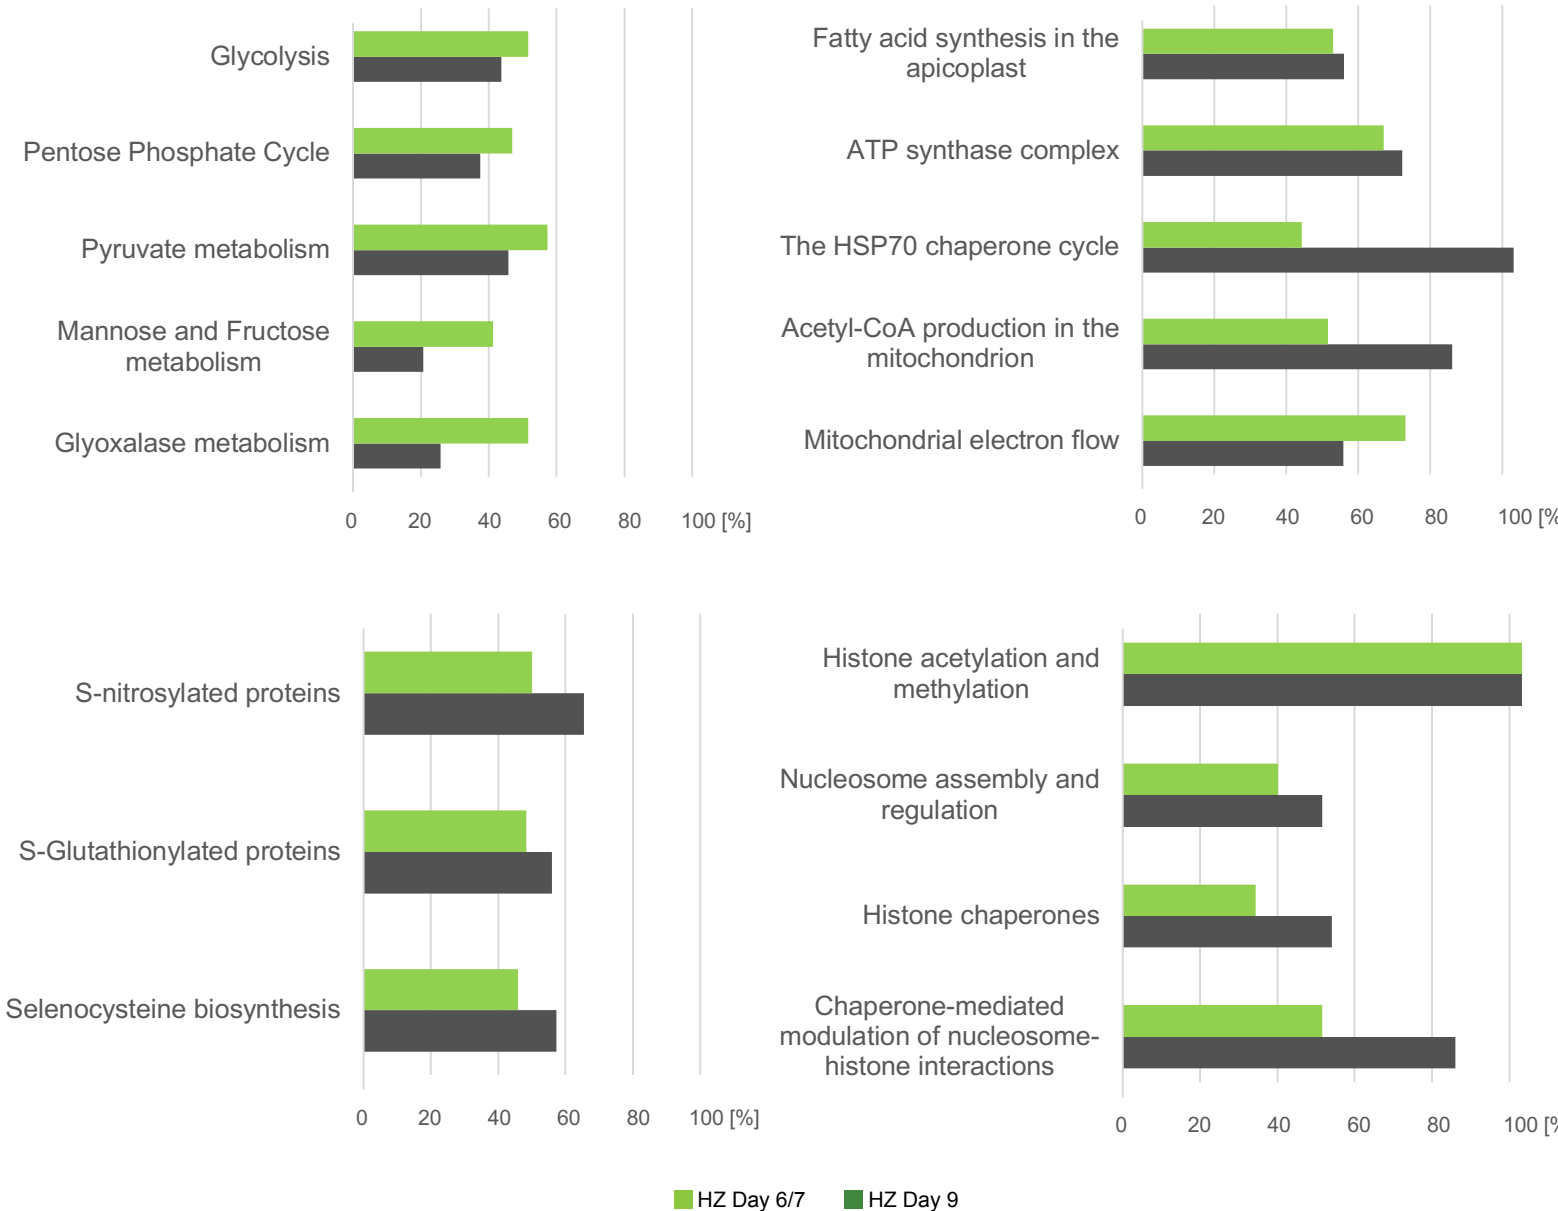

Supplement: supp [file elife-41081-supp-v1.zip]

Figure 1 - Figure Supplement 4

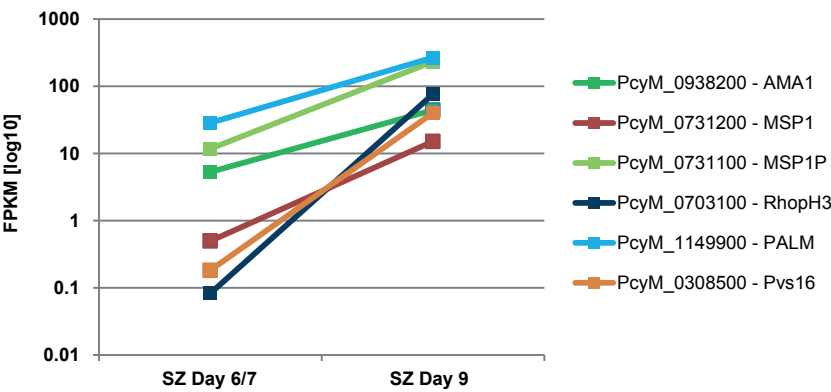

Supplement: supp [file elife-41081-supp-v1.zip]

Figure 3 - Figure Supplement 1

A.

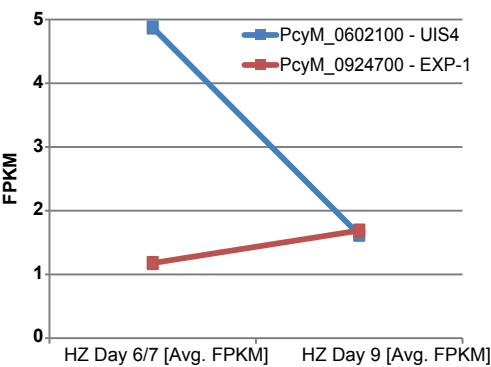

C.

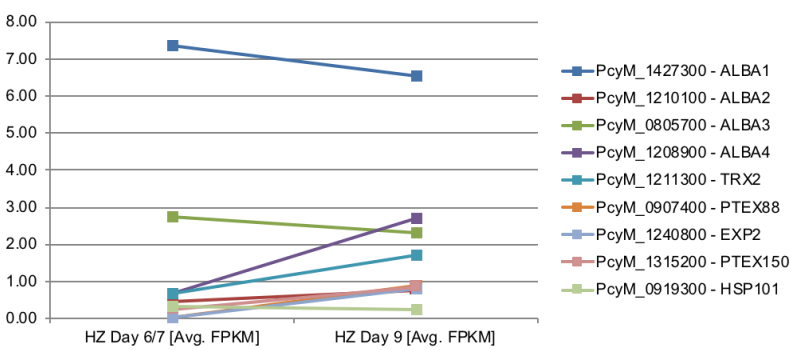

B.

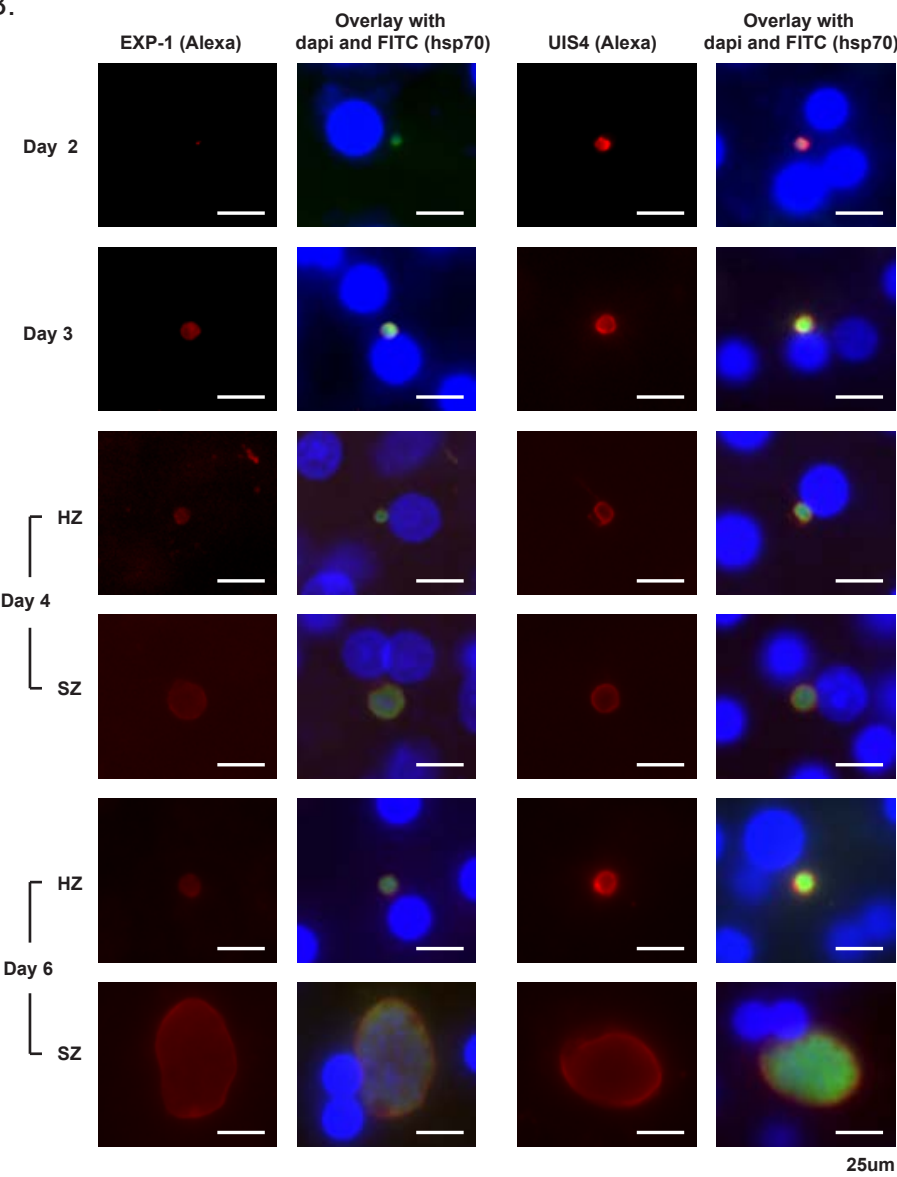

Supplement: supp [file elife-41081-supp-v1.zip]
